# Supplementary material
Source: publisher figshare collection journal article supplement (https://acs.figshare.com/ndownloader/files/22748447)
Supplement: Supplementary file 1 [file 22748447]

## Sheet: SUPPLEMNTARY TABLE 5
Ensembl_ID	Gene_name	NPC_LN_B1	NPC_LN_B2	NPC_VDP_B1	NPC_VDP_B2	Neuron_LN_B1	Neuron_LN_B2	Neuron_VDP_B1	Neuron_VDP_B2	Astrocyte_LN_B1	Astrocyte_LN_B2	Astrocyte_VDP_B1	Astrocyte_VDP_B2	FC NPC VS NEUR LN	FC NPC VS NEUR VDP	FC NPC VS ASRO LN	FC NPC VS ASTRO VDP	FC NEUR VS ASTRO LN	FC NEUR VS ASTRO VDP	FDR_3_group_comparison
ENSG00000149054	ZNF215	7.94718	7.22433	7.12425	6.27106	1.96604	2.83016	1.90713	2.42132	0.597614	0.420986	0.310182	0.719668	-1.6614	-1.62981	-3.8967	-3.70122	-2.23531	-2.07142	3.63704e-09
ENSG00000239064	snoU13	27.0667	28.1327	29.8855	15.4474	1.62692	8.05844	3.36675	1.68729	0.01	2.97275	0.01	0.01	-2.51077	-3.16504	-4.20993	-11.1463	-1.69916	-7.9813	1.52034e-05
ENSG00000132837	DMGDH	0.745172	0.876431	1.15477	1.28704	0.188592	0.116767	0.146353	0.195591	0.0218385	0.0646127	0.01	0.0441817	-2.40884	-2.83612	-4.22939	-5.494	-1.82055	-2.65788	1.03887e-07
ENSG00000162998	FRZB	63.3644	43.0389	54.5916	59.3745	18.887	18.3616	15.5774	21.4941	1.12297	4.037	2.29725	1.50238	-1.51428	-1.62022	-4.36604	-4.9066	-2.85175	-3.28638	5.8171e-08
ENSG00000231274	SBK3	2.03134	1.33718	1.99368	1.80338	0.244198	0.403187	0.421121	0.0844203	0.150813	0.01	0.0747193	0.0762781	-2.37942	-2.90898	-4.38866	-4.65229	-2.00924	-1.74331	7.2643e-07
ENSG00000178803	ADORA2A-AS1	4.46301	5.30147	5.44405	5.67642	0.827779	1.33635	1.14201	0.985685	0.142007	0.308111	0.0844274	0.229837	-2.17376	-2.38586	-4.43917	-5.1451	-2.26541	-2.75924	2.90292e-09
ENSG00000171243	SOSTDC1	3.70156	3.41506	2.98492	3.40221	0.749973	0.495302	0.620801	0.362976	0.185269	0.137038	0.0458951	0.140558	-2.51473	-2.69876	-4.46468	-5.09829	-1.94996	-2.39952	3.16056e-09
ENSG00000104313	EYA1	3.8976	3.56006	3.47758	3.46396	0.733591	0.890824	0.856992	1.03078	0.153454	0.15134	0.0217222	0.0221754	-2.1988	-1.87857	-4.61281	-7.30497	-2.41401	-5.4264	9.69559e-09
ENSG00000141401	IMPA2	45.946	40.5894	34.123	44.7282	13.6629	15.2028	13.0985	14.002	1.43966	1.92268	1.24822	2.18444	-1.58394	-1.54081	-4.68576	-4.52173	-3.10182	-2.98092	1.09269e-11
ENSG00000212464	SNORA12	24.4889	16.7265	29.6144	20.6315	5.04676	3.33301	6.09222	2.61703	0.779202	0.768467	0.772099	0.788207	-2.2982	-2.52839	-4.73501	-5.00911	-2.43681	-2.48072	5.24251e-08
ENSG00000167994	RAB3IL1	9.95686	13.443	12.4987	13.116	3.3729	1.99665	2.46851	3.19946	0.228628	0.638855	0.377573	0.269815	-2.12363	-2.17607	-4.75352	-5.3062	-2.62989	-3.13013	1.92119e-09
ENSG00000233672	RNASEH2B-AS1	0.981308	1.14745	0.90292	0.816736	0.221191	0.438241	0.305156	0.2294	0.0683022	0.01	0.01	0.01	-1.69072	-1.68571	-4.76482	-6.42598	-3.0741	-4.74027	2.64928e-06
ENSG00000180921	FAM83H	9.95061	9.96436	9.77506	10.8319	2.88667	2.9463	3.21313	2.97112	0.425433	0.279714	0.20074	0.163943	-1.77155	-1.73646	-4.81979	-5.82035	-3.04823	-4.08388	4.74627e-11
ENSG00000121570	DPPA4	15.4198	13.8873	16.2528	16.6058	2.3264	2.52528	2.76564	3.36243	0.802441	0.203499	0.136307	0.208727	-2.59469	-2.42276	-4.86463	-6.57339	-2.26994	-4.15062	1.33365e-08
ENSG00000203952	CCDC160	27.7532	24.9045	29.8716	31.1536	3.38471	3.42146	4.07396	3.22377	1.08784	0.631087	0.190221	0.453109	-2.95173	-3.06389	-4.93707	-6.5677	-1.98534	-3.50382	2.79492e-10
ENSG00000064300	NGFR	85.2072	77.7696	97.6703	103.963	11.3218	11.3634	15.6607	16.5314	2.76007	2.39539	0.519632	0.195437	-2.84485	-2.64695	-4.98242	-8.13943	-2.13757	-5.49248	5.35951e-07
ENSG00000267480	RP11-703I16.1	8.78254	5.67992	7.54225	5.56926	2.11159	2.55668	2.67041	1.94663	0.01	0.428708	0.01	0.21986	-1.63135	-1.5058	-5.04291	-5.83393	-3.41156	-4.32814	3.62887e-07
ENSG00000175445	LPL	1.80733	1.00024	1.31741	1.18329	0.310384	0.670862	0.408743	0.204847	0.0261394	0.0515585	0.129505	0.0793244	-1.51664	-2.02698	-5.1753	-3.58193	-3.65867	-1.55495	9.79596e-07
ENSG00000145703	IQGAP2	70.6336	64.2859	61.2556	65.8989	16.9105	17.2791	15.814	16.37	1.89842	1.55784	2.26882	3.26901	-1.98047	-1.98217	-5.28675	-4.52112	-3.30628	-2.53895	1.34508e-11
ENSG00000128271	ADORA2A	41.6025	46.5045	41.4842	48.4383	6.16311	5.14141	6.04137	6.78942	0.628305	1.50871	1.86773	1.85143	-2.96236	-2.80907	-5.36559	-4.59563	-2.40323	-1.78656	2.59437e-10
ENSG00000144668	ITGA9	4.67233	2.98355	3.79601	4.24334	0.985938	0.947112	1.0047	1.00704	0.110709	0.0545921	0.137125	0.111989	-1.98569	-1.99864	-5.5334	-5.0122	-3.54771	-3.01356	3.7559e-11
ENSG00000152578	GRIA4	21.7682	20.1446	22.2726	22.7919	6.0946	5.15075	6.433	6.06643	0.30672	0.571377	0.900514	0.344738	-1.89806	-1.85013	-5.57687	-5.17748	-3.67881	-3.32735	8.03557e-10
ENSG00000071909	MYO3B	1.24883	1.46675	1.32143	1.79369	0.465397	0.490786	0.559218	0.482669	0.0139076	0.0411479	0.01	0.01	-1.5059	-1.58009	-5.62423	-7.28314	-4.11833	-5.70306	1.10486e-08
ENSG00000179294	C17orf96	85.5464	76.7908	74.7245	84.9486	16.0544	17.802	15.3825	18.6371	2.52015	0.700122	2.18064	2.6929	-2.2615	-2.23068	-5.65567	-5.03401	-3.39417	-2.80333	9.85085e-10
ENSG00000110195	FOLR1	2.21751	1.89811	1.38025	1.79909	0.392028	0.155343	0.24338	0.487892	0.01	0.0716326	0.01	0.01	-2.91052	-2.12025	-5.65582	-7.31259	-2.7453	-5.19234	1.89734e-07
ENSG00000111452	GPR133	1.83068	1.73574	2.16663	2.24644	0.369593	0.332848	0.417185	0.574964	0.05447	0.0153485	0.115658	0.0550995	-2.34403	-2.15316	-5.67472	-4.69177	-3.3307	-2.53861	6.84677e-09
ENSG00000196092	PAX5	0.722441	0.531402	0.419292	0.58146	0.120252	0.132362	0.124425	0.207858	0.01	0.01	0.0122648	0.01	-2.31135	-1.5906	-5.97021	-5.49018	-3.65886	-3.89957	2.13829e-08
ENSG00000164946	FREM1	0.649701	0.645497	0.685714	0.845193	0.160802	0.284459	0.285228	0.238243	0.01	0.01	0.01	0.01	-1.54045	-1.5482	-6.01703	-6.25824	-4.47658	-4.71004	6.20148e-08
ENSG00000075673	ATP12A	0.716556	0.744777	0.735392	0.786442	0.0331312	0.0328211	0.068562	0.0343608	0.01	0.01	0.01	0.01	-4.46972	-3.88618	-6.19114	-6.24967	-1.72142	-2.36349	9.38228e-08
ENSG00000182022	CHST15	51.1403	52.7848	59.7958	66.1178	10.472	10.3269	12.9976	12.7323	0.219978	1.10643	0.261568	0.289277	-2.32096	-2.29092	-6.29187	-7.83657	-3.97091	-5.54566	6.63445e-09
ENSG00000214491	SEC14L6	2.91094	3.37227	3.37592	4.1533	0.51033	0.252776	1.05608	0.907319	0.01	0.0666065	0.01	0.102476	-3.04155	-1.93915	-6.35789	-6.06481	-3.31635	-4.12566	1.60987e-07
ENSG00000127578	WFIKKN1	34.6429	30.6599	40.1792	39.8313	7.90845	6.70446	9.20578	9.51637	0.281778	0.509475	0.302477	0.237529	-2.1599	-2.09544	-6.36686	-7.21107	-4.20696	-5.11563	3.83163e-12
ENSG00000178394	HTR1A	1.03313	0.715876	0.844976	2.02	0.206996	0.01	0.285573	0.0715594	0.01	0.01	0.01	0.01	-3.01079	-3.00399	-6.45039	-7.16238	-3.4396	-4.15839	5.94491e-05
ENSG00000175084	DES	0.918333	0.867729	0.57612	0.436756	0.100362	0.0994223	0.103845	0.208173	0.01	0.01	0.01	0.01	-3.16027	-1.69876	-6.48064	-5.66231	-3.32037	-3.96355	9.30197e-06
ENSG00000160202	CRYAA	0.847227	0.939301	1.29925	1.55803	0.2037	0.134529	0.351281	0.422519	0.01	0.01	0.01	0.01	-2.40109	-1.88461	-6.48101	-7.1585	-4.07992	-5.27389	7.7366e-06
ENSG00000229425	AJ006998.2	1.13139	0.962138	2.36593	1.85883	0.01	0.122488	0.127937	0.256469	0.01	0.01	0.01	0.01	-3.982	-3.45817	-6.70979	-7.72273	-2.72779	-4.26456	2.88048e-05
ENSG00000116039	ATP6V1B1	56.1758	58.5495	67.6694	71.3929	8.94834	8.81841	11.2361	10.7305	0.388573	0.638699	0.0855625	0.262043	-2.69093	-2.66235	-6.80322	-8.64407	-4.11229	-5.98172	2.73066e-11
ENSG00000008196	TFAP2B	116.419	111.094	133.976	133.982	17.0116	12.211	15.6046	16.0997	1.04316	0.90019	0.203039	0.30149	-2.96079	-3.07926	-6.87126	-9.05285	-3.91046	-5.9736	1.37249e-09
ENSG00000134817	APLNR	1.32116	1.0518	1.18976	0.748656	0.168961	0.334759	0.13986	0.210278	0.01	0.01	0.01	0.01	-2.23599	-2.46888	-6.89054	-6.59873	-4.65455	-4.12985	8.78266e-07
ENSG00000124253	PCK1	1.51372	0.952284	1.53941	1.7998	0.19155	0.189757	0.222973	0.148994	0.01	0.01	0.01	0.01	-2.69315	-3.16626	-6.94603	-7.38336	-4.25288	-4.2171	3.52086e-08
ENSG00000245552	RP11-712B9.2	2.146	1.96929	3.18423	2.6849	0.2789	0.78282	0.649303	0.626709	0.0215306	0.01	0.213343	0.174235	-1.95459	-2.2015	-7.0281	-3.92059	-5.07351	-1.71908	3.28367e-06
ENSG00000166450	PRTG	101.867	89.02	90.6711	88.001	15.7522	14.3363	17.0991	16.2744	0.96328	0.463227	1.22271	1.57839	-2.66544	-2.42054	-7.06409	-5.99518	-4.39865	-3.57464	2.96872e-10
ENSG00000228271	RP11-513G11.2	1.91652	0.905456	1.70999	2.26492	0.01	0.138327	0.433439	0.144816	0.01	0.01	0.01	0.01	-4.24986	-2.78114	-7.14056	-7.63478	-2.89071	-4.85363	1.62189e-05
ENSG00000244342	LINC00698	1.64865	1.51886	2.172	1.74639	0.0900879	0.133867	0.0466072	0.01	0.01	0.01	0.01	0.01	-3.82207	-6.11313	-7.3072	-7.61412	-3.48514	-1.50098	3.09888e-07
ENSG00000254031	RP11-326E22.1	1.78967	1.42247	1.35611	1.20164	0.126556	0.250744	0.261897	0.131253	0.01	0.01	0.01	0.01	-3.08975	-2.70172	-7.32739	-6.99873	-4.23764	-4.29701	2.81599e-06
ENSG00000172987	HPSE2	1.91355	1.31088	1.08043	1.24101	0.522814	0.207168	0.0540958	0.108443	0.01	0.01	0.01	0.01	-2.14311	-3.83616	-7.3329	-6.85888	-5.18979	-3.02272	1.16777e-05
ENSG00000182168	UNC5C	45.6506	33.0098	37.8939	41.3438	8.95748	7.41762	8.99293	8.43774	0.192977	0.274905	4.01558	1.3773	-2.26413	-2.18456	-7.39335	-3.87706	-5.12922	-1.6925	4.47851e-05
ENSG00000165694	FRMD7	3.68217	4.02016	4.52688	4.29713	0.260385	0.147399	0.0769775	0.154313	0.0344593	0.01	0.0341452	0.01	-4.23942	-5.25365	-7.43667	-7.64303	-3.19725	-2.38938	2.70084e-10
ENSG00000150394	CDH8	2.70647	2.01497	2.63717	2.15495	0.639751	0.398365	0.34989	0.350704	0.0169329	0.01	0.0419464	0.01	-2.18526	-2.77401	-7.45371	-6.5275	-5.26845	-3.75348	6.1896e-09
ENSG00000187773	FAM69C	2.18343	1.54514	1.96627	1.90011	0.111694	0.0553244	0.173356	0.173759	0.01	0.01	0.01	0.01	-4.48054	-3.47749	-7.54248	-7.59484	-3.06194	-4.11734	5.84489e-08
ENSG00000186047	DLEU7	4.07925	3.8013	2.79563	2.99708	0.811678	0.435544	0.629885	0.385826	0.01	0.0308984	0.01	0.01	-2.65958	-2.51175	-7.59011	-8.1781	-4.93053	-5.66635	2.04641e-09
ENSG00000174004	NRROS	8.48275	10.47	7.87018	10.1195	0.467389	0.926028	0.571538	0.661002	0.0787235	0.01	0.039003	0.35835	-3.76571	-3.86747	-7.73887	-5.50061	-3.97317	-1.63314	1.06858e-08
ENSG00000248329	RP11-366M4.3	2.29747	2.24952	1.96076	2.53372	0.320222	0.237918	0.372752	0.0415132	0.01	0.01	0.01	0.01	-3.02621	-3.43953	-7.82877	-7.81201	-4.80255	-4.37248	3.72402e-07
ENSG00000121904	CSMD2	2.3408	1.3785	1.8722	1.76291	0.109017	0.0944969	0.1128	0.105996	0.01	0.00622497	0.0062544	0.00638488	-4.19183	-4.05434	-7.84067	-8.16794	-3.64884	-4.1136	4.07822e-12
ENSG00000137090	DMRT1	2.33973	2.36616	3.0256	2.85711	0.0760194	0.301231	0.0786577	0.315363	0.01	0.01	0.0348904	0.01	-3.64087	-3.90014	-7.87832	-7.03393	-4.23745	-3.13379	1.1906e-08
ENSG00000263818	CTD-2206N4.4	9.69105	9.91895	11.4581	12.15	1.2747	0.939732	1.31893	1.16828	0.0274617	0.0541667	0.136057	0.0833372	-3.14658	-3.24668	-7.9083	-6.74962	-4.76172	-3.50294	9.36648e-12
ENSG00000106066	CPVL	6.65159	4.16094	6.20526	5.7997	1.888	1.79698	1.80031	2.22682	0.0342942	0.01	0.0679632	0.0346906	-1.55297	-1.57581	-7.93137	-6.8697	-6.3784	-5.29389	2.70301e-10
ENSG00000230006	ANKRD36BP2	2.239	2.65964	3.23738	2.14189	0.138426	0.152368	0.159145	0.462594	0.01	0.01	0.01	0.01	-4.07431	-3.11303	-7.93624	-8.07127	-3.86193	-4.95824	1.75331e-07
ENSG00000262179	RP1-302G2.5	3.41624	1.7754	3.36788	3.24951	0.01	0.435901	0.607054	1.21693	0.01	0.01	0.01	0.549782	-3.54139	-1.85916	-8.02005	-3.56332	-4.47865	-1.70416	0.000120009
ENSG00000139117	CPNE8	3.11857	2.45686	2.22977	2.83411	0.477581	0.331177	0.247077	0.272418	0.01	0.01	0.0219194	0.01	-2.7853	-3.28506	-8.12294	-7.30967	-5.33764	-4.0246	4.28755e-10
ENSG00000206384	COL6A6	3.87827	2.89969	4.63804	4.02069	0.0762225	0.0503394	0.0525785	0.0395256	0.0117685	0.01	0.0116612	0.01	-5.74294	-6.55474	-8.28247	-8.6429	-2.53953	-2.08815	6.63313e-12
ENSG00000130300	PLVAP	10.3969	8.25551	10.757	11.6296	0.107285	0.159421	0.055504	0.01	0.0496932	0.01	0.01	0.01	-6.12797	-8.41684	-8.28758	-10.1284	-2.15961	-1.71158	6.7436e-11
ENSG00000108813	DLX4	23.7354	20.8082	25.8182	27.8784	0.885658	1.10625	1.31483	0.798719	0.071344	0.070361	0.141387	0.0360842	-4.483	-4.66709	-8.29618	-8.2411	-3.81319	-3.57401	8.25744e-13
ENSG00000134215	VAV3	3.47984	3.92565	3.57932	3.8213	0.748234	0.724384	1.00294	0.776002	0.01	0.01	0.0312195	0.01	-2.33021	-2.05663	-8.53245	-7.48817	-6.20224	-5.43155	2.20332e-10
ENSG00000169071	ROR2	54.2022	48.9687	51.3364	54.9198	10.1373	9.2003	10.4891	11.4393	0.0787506	0.155331	0.01	0.0796607	-2.41555	-2.27668	-8.78381	-10.2108	-6.36825	-7.93411	1.74573e-12
ENSG00000170412	GPRC5C	10.3688	9.62872	11.5858	13.3704	2.33235	1.92798	3.3882	3.09172	0.0143089	0.0282235	0.0141785	0.01	-2.23079	-1.94535	-8.87705	-10.0115	-6.64626	-8.06611	1.41127e-11
ENSG00000251226	RP11-469N6.1	5.27668	5.19431	6.70476	7.01086	0.369192	0.432233	0.416732	0.45251	0.01	0.01	0.01	0.01	-3.70769	-3.97992	-9.03218	-9.4216	-5.3245	-5.44169	5.87024e-10
ENSG00000197245	FAM110D	22.8113	21.7456	20.927	25.2929	0.973587	1.04485	1.59501	2.01944	0.01	0.0741238	0.0744741	0.01	-4.46434	-3.67667	-9.04892	-9.09579	-4.58458	-5.41912	2.18552e-11
ENSG00000268027	AC006129.2	4.21413	6.90423	5.52051	6.38634	0.01	0.255184	0.17769	0.0890516	0.01	0.01	0.0788185	0.01	-5.38981	-5.48021	-9.11873	-7.06672	-3.72892	-1.58651	5.84045e-09
ENSG00000222040	ADRA2B	5.36544	5.80505	5.572	6.20785	0.414918	0.1121	0.312231	0.312958	0.01	0.01	0.01	0.01	-4.4057	-4.23589	-9.12548	-9.20211	-4.71978	-4.96622	4.48051e-09
ENSG00000143318	CASQ1	17.8855	16.1527	19.5028	18.7182	2.32146	2.19022	2.05888	2.57959	0.01	0.0504983	0.01	0.103591	-2.91542	-3.04264	-9.13605	-8.39438	-6.22063	-5.35173	1.6253e-11
ENSG00000120594	PLXDC2	6.87489	4.7978	5.58019	5.87763	2.18424	1.87139	1.62886	2.05102	0.01	0.00898899	0.01	0.01	-1.52514	-1.6386	-9.26376	-9.16212	-7.73862	-7.52351	2.6133e-12
ENSG00000169418	NPR1	29.789	37.6718	39.7049	42.9426	0.197714	0.514142	0.12786	0.230683	0.01	0.0903175	0.01	0.0231594	-6.56632	-7.84868	-9.39333	-11.2833	-2.82701	-3.43466	5.18146e-11
ENSG00000161381	PLXDC1	32.4181	33.2455	41.56	41.118	2.34576	2.35021	3.35115	2.55722	0.012347	0.0852379	0.146813	0.224814	-3.8056	-3.80667	-9.39422	-7.79751	-5.58862	-3.99084	8.6129e-11
ENSG00000166426	CRABP1	903.307	800.759	822.763	945.821	160.876	143.828	172.128	169.688	0.2307	2.27522	0.800091	0.116683	-2.4835	-2.3713	-9.40943	-10.9137	-6.92593	-8.54244	7.90694e-11
ENSG00000101197	BIRC7	7.44073	7.80223	6.78578	6.3886	1.18738	0.392088	0.327623	0.492578	0.01	0.01	0.01	0.01	-3.27063	-4.00561	-9.57393	-9.36352	-6.30329	-5.3579	8.70096e-08
ENSG00000250105	CTD-3074O7.2	5.852	10.8747	7.34255	8.43391	0.852728	0.844747	0.441161	0.221094	0.01	0.01	0.01	0.01	-3.30069	-4.57424	-9.70794	-9.62356	-6.40725	-5.04931	4.86543e-07
ENSG00000050555	LAMC3	10.0497	7.55959	6.53015	7.51078	0.260512	0.467759	0.421177	0.523475	0.01	0.01	0.0298916	0.01	-4.59572	-3.89371	-9.78212	-8.45934	-5.1864	-4.56562	2.3112e-11
ENSG00000118733	OLFM3	8.87601	9.22559	12.0531	12.0304	0.27151	0.0537937	0.0561865	0.01	0.01	0.01	0.01	0.01	-5.79819	-8.50729	-9.8219	-10.2338	-4.02371	-1.72654	6.77363e-08
ENSG00000007129	CEACAM21	9.82607	12.2113	12.1368	11.9371	0.256793	0.445181	0.132852	0.0665807	0.01	0.01	0.01	0.01	-4.97239	-6.91542	-10.1057	-10.2333	-5.13334	-3.31783	7.22991e-09
ENSG00000106538	RARRES2	11.1483	12.9243	11.5399	10.1453	2.70616	2.617	1.46671	2.94024	0.01	0.01	0.01	0.01	-2.17704	-2.29886	-10.2332	-10.0825	-8.05614	-7.78363	1.19351e-08
ENSG00000170290	SLN	13.1689	12.5076	14.6239	17.0614	0.409423	0.675984	0.282421	0.849234	0.01	0.01	0.01	0.01	-4.56414	-4.80731	-10.3262	-10.6296	-5.76209	-5.82229	5.25401e-09
ENSG00000088992	TESC	49.2906	42.3509	45.1075	51.5581	11.3631	12.9738	15.0123	12.7169	0.01	0.0586524	0.353578	0.180477	-1.91286	-1.8016	-10.3825	-7.49987	-8.46962	-5.69827	2.59536e-11
ENSG00000147257	GPC3	77.7755	52.8803	61.2298	70.5872	17.2401	18.7053	17.98	15.2311	0.0845022	0.01	0.01	0.01	-1.86189	-1.9888	-10.4331	-12.6862	-8.57125	-10.6975	1.12875e-12
ENSG00000258910	RP11-19E11.1	11.5737	16.4555	14.4669	15.8901	0.131259	0.13003	0.407442	0.01	0.01	0.01	0.01	0.01	-6.74515	-6.18431	-10.4527	-10.5678	-3.70757	-4.3835	1.60677e-08
ENSG00000124205	EDN3	16.6872	14.507	19.5643	19.0546	1.20179	1.00738	1.29132	0.719071	0.01	0.01	0.01	0.01	-3.8197	-4.26376	-10.6071	-10.9151	-6.78736	-6.65134	3.73501e-10
ENSG00000145824	CXCL14	186.868	149.915	216.067	212.344	12.9856	11.8076	8.63297	11.6458	0.174342	0.01	0.115169	0.0587856	-3.76381	-4.40095	-10.8352	-11.2661	-7.07142	-6.86512	7.80221e-13
ENSG00000237412	PRSS56	17.1135	20.0277	37.0855	43.0532	2.79835	2.56681	1.66221	1.9348	0.01	0.01	0.01	0.01	-2.79133	-4.47763	-10.8588	-11.9683	-8.06748	-7.49066	2.24672e-07
ENSG00000263371	AP000673.1	20.3167	22.4367	18.6938	24.1564	6.10596	4.5366	3.15893	4.74942	0.01	0.01	0.01	0.01	-2.00619	-2.43785	-11.0618	-11.0651	-9.05563	-8.62723	1.54334e-06
ENSG00000135547	HEY2	20.4131	27.2623	29.3131	30.5171	2.48103	3.30687	2.14706	2.85381	0.01	0.01	0.0828155	0.01	-3.04213	-3.58062	-11.219	-9.33229	-8.1769	-5.75167	3.98777e-11
ENSG00000018625	ATP1A2	171.901	131.975	140.378	159.162	46.0186	43.079	44.853	41.2516	0.0363743	0.0896829	0.0180214	0.0183973	-1.77003	-1.79859	-11.2352	-13.0058	-9.46516	-11.2072	1.59163e-14
ENSG00000148123	LPPR1	28.2013	26.9519	30.643	33.2244	9.67192	8.07908	8.50819	8.59789	0.01	0.01	0.01	0.01	-1.63554	-1.90057	-11.4292	-11.6409	-9.79369	-9.74029	1.34426e-11
ENSG00000064195	DLX3	33.1858	26.3421	24.3652	33.9083	0.81975	0.315808	0.706832	0.614014	0.01	0.01	0.167217	0.01	-5.7121	-5.46331	-11.5394	-8.36118	-5.82726	-2.89787	4.87625e-11
ENSG00000131668	BARX1	279.14	307.53	285.83	339.552	3.62025	2.27596	3.38571	4.76547	0.12899	0.0636062	0.0639069	0.13048	-6.63662	-6.26159	-11.5728	-11.6516	-4.93614	-5.39	2.54805e-14
ENSG00000272234	CTD-2325A15.5	32.014	34.6908	39.0144	38.3882	1.22827	2.02795	2.7536	2.33539	0.01	0.01	0.187912	0.01	-4.35652	-3.92693	-11.7036	-8.61138	-7.34705	-4.68445	6.13098e-11
ENSG00000131914	LIN28A	277.868	236.667	239.403	280.416	26.4999	22.3706	28.9517	29.531	0.0571571	0.0281848	0.14159	0.23127	-3.39623	-3.15193	-12.5577	-10.4452	-9.1615	-7.29323	4.76303e-14
ENSG00000064218	DMRT3	63.7286	64.4919	73.7434	80.8652	15.1255	17.2931	14.0425	15.3108	0.01	0.01	0.01	0.01	-1.98374	-2.39703	-12.6463	-12.9163	-10.6626	-10.5193	2.32411e-11
ENSG00000092068	SLC7A8	103.113	121.747	121.506	131.471	14.4621	12.5127	15.6314	16.5095	0.01	0.0190112	0.0955054	0.0584987	-3.05934	-2.97652	-12.9201	-10.6818	-9.86078	-7.7053	4.61828e-13
ENSG00000163064	EN1	91.342	125.24	137.464	153.767	0.771178	0.466864	0.664952	0.577632	0.01	0.01	0.0786546	0.0401478	-7.45071	-7.87268	-13.4026	-11.2594	-5.95192	-3.38671	7.51378e-13
ENSG00000139219	COL2A1	430.203	362.738	360.213	411.149	92.603	100.26	109.181	116.064	0.0173655	0.0513787	0.0860359	0.0351323	-2.03964	-1.77591	-13.4937	-12.6362	-11.4541	-10.8603	4.60621e-15
ENSG00000254087	LYN	40.8023	41.4655	41.6092	45.692	3.16573	2.70354	3.46385	2.8681	13.0116	8.64355	11.1227	11.6276	-3.80907	-3.78528	-1.92562	-1.94012	1.88346	1.84516	3.71642e-12
ENSG00000227507	LTB	0.938076	1.04467	1.23306	1.01976	0.0805509	0.0797969	0.0833464	0.0835403	0.298483	0.220778	0.443643	0.150966	-3.62822	-3.75479	-1.93297	-1.92172	1.69525	1.83307	1.22808e-06
ENSG00000205086	C2orf91	0.280741	0.238744	0.281799	0.267039	0.01	0.0303941	0.01	0.0318199	0.01	0.112124	0.0844903	0.086253	-3.68487	-3.71412	-2.08874	-1.68455	1.59613	2.02957	0.000107718
ENSG00000170961	HAS2	10.629	8.26658	12.0386	14.3598	0.0295097	0.116934	0.0916014	0.336653	0.38272	4.04408	2.38374	1.355	-7.01156	-5.94584	-2.09371	-2.81982	4.91785	3.12601	4.52698e-06
ENSG00000125845	BMP2	3.77024	3.62186	3.75816	4.86314	0.137346	0.0680301	0.248697	0.106832	0.954258	0.690148	1.38682	0.418291	-5.16965	-4.59987	-2.16842	-2.25582	3.00123	2.34405	3.78987e-08
ENSG00000248690	HAS2-AS1	1.6035	0.952376	2.16043	2.34233	0.01	0.01	0.01	0.01	0.0637766	0.503183	0.568757	0.322568	-6.99768	-7.81467	-2.1725	-2.33679	4.82517	5.47788	1.99452e-05
ENSG00000162878	PKDCC	173.685	178.319	198.341	227.247	11.4668	13.2006	12.3536	13.4932	19.0564	53.8776	38.8931	42.6566	-3.83491	-4.0414	-2.27093	-2.38371	1.56399	1.65769	2.75685e-08
ENSG00000166387	PPFIBP2	10.3206	10.8716	11.3954	11.3937	0.102856	0.229259	0.159638	0.146675	2.09624	2.06736	1.85289	1.75902	-5.99571	-6.21719	-2.34763	-2.65751	3.64807	3.55968	1.71357e-12
ENSG00000150540	HNMT	4.48035	4.36435	4.52077	4.52932	0.0260197	0.128881	0.107691	0.080956	0.867748	0.855792	1.43306	1.4142	-5.8354	-5.58417	-2.35944	-1.66836	3.47596	3.91581	6.67968e-10
ENSG00000236013	RP3-332B22.1	1.39937	1.8181	2.43721	2.56706	0.01	0.01	0.0621655	0.01	0.222629	0.384233	0.2206	0.112601	-7.32978	-6.1157	-2.40648	-3.90869	4.9233	2.20701	1.05692e-07
ENSG00000077943	ITGA8	0.560174	0.340821	0.678854	0.6368	0.0164248	0.01	0.0169948	0.01	0.0608622	0.0750296	0.211076	0.0307828	-5.09156	-5.60696	-2.72906	-2.44354	2.3625	3.16341	1.46212e-06
ENSG00000163380	LMOD3	1.10647	1.15005	1.08448	0.983824	0.0289162	0.0286455	0.01	0.01	0.107149	0.15851	0.0796295	0.0541939	-5.29284	-6.6923	-3.08645	-3.95005	2.2064	2.74226	1.4813e-08
ENSG00000240563	L1TD1	17.7435	19.5255	22.5467	21.046	0.385489	0.477351	0.465345	1.19939	2.32121	1.99574	2.86032	2.16742	-5.43274	-4.71073	-3.10989	-3.11611	2.32285	1.59462	4.57901e-10
ENSG00000111058	ACSS3	13.9636	14.4437	15.3219	14.3689	0.484805	0.560312	0.81515	1.11035	1.16021	2.08544	3.26348	2.68797	-4.76452	-3.94672	-3.12968	-2.31871	1.63484	1.62801	1.22421e-08
ENSG00000171227	TMEM37	11.2636	12.127	14.4929	18.3544	0.0539466	0.01	0.01	0.01	1.3993	1.13359	3.96156	3.79144	-8.51485	-10.6816	-3.20707	-2.08295	5.30777	8.59861	3.15329e-08
ENSG00000261265	CTD-2515H24.4	2.05707	1.20267	1.53786	3.17958	0.01	0.01	0.01	0.01	0.01	0.282412	0.283746	0.434499	-7.34861	-7.88186	-3.47868	-2.71545	3.86993	5.16641	4.19639e-05
ENSG00000121075	TBX4	1.23548	2.14022	2.03674	2.22794	0.01	0.01	0.01	0.0320907	0.114657	0.169617	0.142015	0.115982	-7.39904	-6.66279	-3.56983	-4.04701	3.82921	2.61579	4.33151e-09
ENSG00000005102	MEOX1	14.7042	17.9688	21.6753	25.407	0.319734	0.226244	0.0945229	0.189486	1.77717	0.876342	6.45688	2.43974	-5.90311	-7.37311	-3.62212	-2.40386	2.28099	4.96925	8.6364e-07
ENSG00000158104	HPD	20.5983	30.0788	29.4258	34.8027	0.01	0.164635	0.01	0.229811	0.923732	2.27751	0.355954	0.467204	-8.18085	-8.06517	-3.98463	-6.2859	4.19622	1.77927	6.56041e-08
ENSG00000133636	NTS	11.1121	11.0685	10.7114	12.2685	0.15903	0.0787706	0.01	0.01	0.147322	0.726461	0.0729894	0.01	-6.54341	-10.1662	-4.66588	-8.11323	1.87752	2.05293	2.28547e-08
ENSG00000145681	HAPLN1	95.9777	79.8554	102.025	105.442	0.23108	0.211308	0.147138	0.276526	3.01342	2.09494	0.668983	3.31475	-8.63468	-8.93575	-5.1052	-5.70262	3.52948	3.23313	1.02612e-09
ENSG00000267045	AC006126.4	27.9493	40.6701	39.7065	52.3196	0.01	0.01	0.01	0.01	0.01	0.245575	0.493472	0.01	-11.7444	-12.1678	-8.06872	-7.51399	3.67568	4.65384	1.66053e-08
ENSG00000226539	AC012512.1	3.00825	4.31786	2.63614	3.81523	0.861042	0.341193	0.712739	0.892997	1.43577	1.10133	0.158076	0.484122	-2.60733	-2.00637	-1.52987	-3.32851	1.07746	-1.32215	6.69895e-05
ENSG00000152661	GJA1	348.692	282.485	323.518	350.873	37.3746	38.5977	41.0729	37.1149	115.561	101.062	85.0212	128.685	-3.0545	-3.10857	-1.54286	-1.65795	1.51164	1.45062	7.59256e-12
ENSG00000248309	MEF2C-AS1	0.478223	0.533877	0.73337	0.640204	0.127755	0.147652	0.0660944	0.110414	0.11835	0.213985	0.136816	0.13967	-1.87771	-2.96013	-1.60664	-2.31266	0.271069	0.647474	1.45853e-06
ENSG00000204882	GPR20	1.22202	1.62297	1.74907	2.00187	0.5713	0.242551	0.168893	0.253929	0.604846	0.298256	0.299666	0.0764795	-1.80559	-3.14913	-1.65546	-3.31789	0.150125	-0.168761	2.9427e-05
ENSG00000139679	LPAR6	36.9398	31.5515	35.33	38.8656	3.77613	3.86049	4.28227	4.69953	9.71081	11.7022	9.42818	10.8421	-3.16491	-3.04626	-1.67743	-1.87197	1.48748	1.17429	2.94563e-12
ENSG00000180066	C10orf91	3.32761	5.76444	6.35555	6.80997	1.09099	0.900649	2.06956	1.32006	1.57216	1.21825	1.27964	1.24954	-2.19065	-1.95757	-1.70413	-2.38002	0.486516	-0.422455	1.48876e-06
ENSG00000251323	RP11-452H21.4	1.00222	1.0417	1.55616	1.48955	0.150604	0.149194	0.15583	0.390482	0.558064	0.068797	0.0691222	0.211693	-2.76928	-2.47898	-1.70512	-3.43908	1.06416	-0.960107	6.12845e-05
ENSG00000135114	OASL	1.76119	1.78479	0.850764	0.879495	0.264652	0.41948	0.164302	0.01	0.343236	0.725372	0.01	0.01	-2.37383	-3.31132	-1.73045	-6.43484	0.643385	-3.12352	0.00453295
ENSG00000136960	ENPP2	37.9987	30.2172	37.6777	40.0551	3.91388	3.0035	4.44898	4.09725	4.39174	14.4878	6.07215	2.42788	-3.30181	-3.18516	-1.85329	-3.19299	1.44853	-0.00782093	1.23178e-05
ENSG00000107104	KANK1	17.9276	17.0611	18.6759	20.2082	3.25412	2.94145	3.26502	2.90899	5.14605	4.40447	5.16954	4.68189	-2.49758	-2.6549	-1.87324	-1.98077	0.624341	0.674124	1.64616e-12
ENSG00000124097	HMGB1P1	1.77891	2.35324	2.08321	1.99974	0.194411	0.01	0.201158	0.01	1.08059	0.01	0.01	0.18218	-4.33734	-4.27321	-1.92178	-4.40908	2.41556	-0.135867	0.000223861
ENSG00000184260	HIST2H2AC	11.2974	14.9226	14.7262	16.7906	2.82942	4.2044	2.63485	3.22787	4.4559	2.3265	2.59722	5.30281	-1.89828	-2.42648	-1.9508	-1.99619	-0.0525131	0.430289	9.93286e-07
ENSG00000112312	GMNN	102.23	95.1171	90.7769	95.9367	33.3583	32.2546	30.0207	30.6602	33.123	16.379	23.1031	39.9168	-1.58869	-1.62151	-1.99518	-1.56695	-0.406494	0.0545656	3.95431e-07
ENSG00000267783	CTB-55O6.10	28.0806	14.2539	26.7388	16.1503	7.06546	2.33311	5.68607	5.69931	9.09069	1.43447	5.76501	5.51745	-2.17132	-1.91343	-2.00799	-1.92653	0.163329	-0.013101	7.42616e-05
ENSG00000163535	SGOL2	49.1551	39.7473	42.8241	46.0736	14.4753	14.8483	14.659	13.5219	15.3687	6.34042	10.3472	17.1626	-1.60016	-1.65743	-2.03392	-1.6922	-0.433757	-0.0347734	1.25478e-06
ENSG00000111602	TIMELESS	108.268	79.4194	86.1476	101.498	30.9845	31.5398	29.1086	30.9462	32.0006	13.7419	23.8992	38.6526	-1.58584	-1.64366	-2.03672	-1.58489	-0.45088	0.0587718	2.23743e-06
ENSG00000100206	DMC1	1.42805	2.19109	2.06481	1.97284	0.44962	0.445412	0.761276	0.381524	0.605846	0.261406	0.375202	0.880968	-2.01564	-1.82094	-2.06112	-1.68448	-0.045489	0.136459	1.48908e-05
ENSG00000197153	HIST1H3J	5.0083	4.69769	6.40657	7.66865	1.46848	1.30926	1.82333	2.89365	0.816219	1.47578	1.21317	1.92652	-1.80497	-1.57722	-2.08227	-2.16446	-0.277298	-0.587241	5.63159e-06
ENSG00000062822	POLD1	88.514	79.0114	67.9378	83.6499	25.6407	26.8384	25.2659	25.5624	25.0975	14.2136	18.8619	30.3028	-1.67456	-1.57645	-2.09137	-1.62446	-0.416806	-0.0480087	5.71783e-08
ENSG00000134057	CCNB1	304.419	250.168	256.535	313.197	87.973	89.1128	92.5765	90.7366	95.6463	31.8403	60.3433	104.452	-1.64696	-1.63597	-2.12107	-1.78961	-0.474103	-0.153636	7.48462e-06
ENSG00000188486	H2AFX	1009.35	839.933	914.945	975.181	250.509	254.008	231.776	269.34	285.008	137.951	240.921	340.205	-1.87399	-1.91527	-2.12838	-1.70156	-0.254381	0.213706	1.31744e-07
ENSG00000160957	RECQL4	69.1671	62.8922	56.9698	60.0703	18.6882	17.4158	15.928	18.8678	18.8519	9.80216	14.6925	23.0859	-1.87095	-1.75002	-2.20438	-1.63137	-0.333422	0.118647	8.95459e-08
ENSG00000173207	CKS1B	22.216	17.604	15.7864	17.7422	4.91832	4.87229	4.76069	5.59449	5.3401	3.28554	2.57289	4.60889	-2.02402	-1.69504	-2.20679	-2.22298	-0.182767	-0.527938	1.98277e-08
ENSG00000100479	POLE2	31.4303	29.8464	27.5105	28.8368	8.70331	8.04153	9.13524	9.37348	9.72935	3.44055	7.52816	11.9199	-1.87162	-1.60614	-2.21809	-1.53472	-0.346473	0.0714241	2.46641e-06
ENSG00000080986	NDC80	66.169	52.0267	52.6815	63.9993	17.6538	17.2845	19.8657	20.0901	19.8541	5.42858	12.8947	24.1388	-1.7583	-1.54609	-2.22496	-1.65566	-0.466662	-0.109571	3.37694e-05
ENSG00000197261	C6orf141	0.742507	0.805305	0.653491	0.644852	0.232854	0.0384458	0.120468	0.0402493	0.287615	0.0354566	0.106872	0.181837	-2.51227	-3.01408	-2.2603	-2.16898	0.251965	0.845095	4.92781e-05
ENSG00000156970	BUB1B	142.722	113.783	108.571	124.915	40.2207	41.6504	40.902	37.9317	39.9978	12.7956	25.7121	48.0706	-1.64756	-1.56645	-2.28055	-1.66198	-0.632996	-0.0955291	1.62023e-05
ENSG00000196154	S100A4	29.5013	25.657	24.9289	25.4844	3.37764	4.06302	5.11747	5.12937	4.58171	6.72277	6.2009	3.95642	-2.89008	-2.29862	-2.28668	-2.31128	0.603392	-0.0126603	3.6588e-09
ENSG00000172889	EGFL7	59.6992	56.9877	45.3	48.1317	9.19478	11.6016	9.86439	11.4432	11.8353	11.7607	15.6366	13.1058	-2.48824	-2.13254	-2.30603	-1.70073	0.18221	0.431813	1.41691e-10
ENSG00000105173	CCNE1	40.0119	40.9217	41.7171	47.469	9.77417	9.53958	10.5119	9.288	8.38553	7.91808	7.38094	13.0395	-2.06711	-2.17132	-2.31155	-2.1268	-0.244437	0.0445178	9.10609e-10
ENSG00000100526	CDKN3	83.0587	77.2703	87.0829	88.2586	19.9428	20.7607	22.3137	20.8933	24.111	7.78214	19.2991	32.6884	-1.97781	-2.02083	-2.32972	-1.75393	-0.35191	0.266899	6.05508e-06
ENSG00000024526	DEPDC1	54.1443	43.6562	47.1423	52.6451	13.7175	14.2322	14.9303	14.2265	14.4148	4.89819	9.66968	16.7009	-1.80701	-1.77502	-2.34027	-1.91993	-0.533256	-0.144902	3.26764e-06
ENSG00000223414	LINC00473	0.211536	0.586312	1.03807	1.54262	0.169532	0.111964	0.087708	0.29304	0.0261752	0.129073	0.0518732	0.01	-1.503	-2.76085	-2.36154	-5.3823	-0.858539	-2.62145	0.000193919
ENSG00000186777	ZNF732	5.95639	4.48481	3.40919	5.13034	1.29678	1.11708	1.22511	1.05254	1.61916	0.412092	0.983344	1.95488	-2.11287	-1.90661	-2.36185	-1.53921	-0.248976	0.367399	7.43542e-06
ENSG00000130203	APOE	143.131	150.525	150.4	156.328	14.3905	16.9952	18.2183	19.3727	11.3968	45.6808	41.5972	17.1869	-3.22595	-3.0285	-2.36313	-2.38346	0.862817	0.64504	3.69943e-06
ENSG00000138646	HERC5	2.35229	2.33278	1.42969	1.97063	0.389149	0.488308	0.563716	0.295967	0.3605	0.521448	0.0476284	0.291733	-2.41667	-1.98379	-2.40931	-3.32477	0.00736437	-1.34098	7.75167e-06
ENSG00000214826	DDX12P	9.17179	8.31879	7.95887	6.78544	3.07769	2.24966	1.88597	2.69608	2.18678	1.03737	1.53599	3.02406	-1.71509	-1.68609	-2.43959	-1.69304	-0.724501	-0.00694295	1.26383e-06
ENSG00000073111	MCM2	148.265	119.299	106.595	132.861	44.3196	43.1797	38.1799	36.672	35.422	13.6046	27.1757	44.1802	-1.61254	-1.67765	-2.44825	-1.74666	-0.835706	-0.0690081	4.09772e-06
ENSG00000151725	CENPU	57.3094	48.2701	56.8586	60.4525	13.107	18.2438	13.8623	17.9812	14.6396	4.58528	11.1938	16.83	-1.75175	-1.88127	-2.45728	-2.06562	-0.705525	-0.18435	5.07701e-06
ENSG00000164707	SLC13A4	6.44197	6.61566	9.5641	9.30118	0.555364	0.504318	0.606562	1.00796	1.17187	1.198	1.03374	1.3878	-3.62319	-3.54656	-2.46201	-2.96174	1.16118	0.584817	1.01301e-09
ENSG00000160298	C21orf58	27.0728	22.6279	30.9107	28.4573	7.58391	8.4578	8.30445	9.91615	5.88338	3.01806	4.33494	8.61096	-1.63144	-1.70411	-2.48115	-2.19719	-0.849717	-0.493075	5.90027e-07
ENSG00000075702	WDR62	24.1061	19.4013	18.0852	19.1863	6.8685	6.97964	5.58864	5.54917	5.69491	2.06861	3.971	7.68097	-1.65157	-1.74261	-2.48648	-1.6775	-0.834908	0.065108	9.66724e-06
ENSG00000144354	CDCA7	83.4801	80.2189	70.8216	82.0666	21.7496	21.1101	19.7401	17.3739	21.1965	7.43717	14.5407	31.4554	-1.93335	-2.04244	-2.51526	-1.73289	-0.581906	0.309548	9.2417e-06
ENSG00000072571	HMMR	91.7623	75.7193	86.454	90.4685	25.5341	23.2391	26.0624	27.5906	22.7804	6.40669	15.9914	26.3145	-1.77984	-1.72139	-2.5206	-2.06419	-0.740761	-0.342798	7.72889e-06
ENSG00000161570	CCL5	4.14951	7.07038	3.69286	3.36464	0.817762	1.05314	0.930756	0.424055	0.833314	1.12068	0.375326	0.61305	-2.58425	-2.38106	-2.52156	-2.83602	0.0626925	-0.45496	3.07584e-06
ENSG00000244125	AC078882.1	5.43936	5.65359	6.59731	7.99599	0.297225	0.883329	0.92262	1.23302	0.01	1.90085	0.272833	0.278525	-3.23211	-2.75912	-2.53736	-4.72617	0.694748	-1.96706	2.10725e-05
ENSG00000183763	TRAIP	26.5886	18.7189	20.2856	23.2808	7.46954	7.58743	5.88485	7.35352	5.1985	2.5288	4.10697	6.5377	-1.58932	-1.71849	-2.55171	-2.03309	-0.962395	-0.314595	1.02485e-07
ENSG00000126787	DLGAP5	167.757	126.029	135.388	148.604	47.0035	46.5636	47.5183	46.5448	36.2963	13.4313	27.1443	45.5946	-1.65069	-1.59415	-2.56265	-1.96505	-0.911954	-0.370903	2.85067e-06
ENSG00000161267	BDH1	9.18817	10.8054	10.0225	10.4254	0.447795	0.766224	0.842428	0.844388	1.961	1.4009	1.43243	2.32699	-4.04167	-3.59958	-2.57219	-2.44337	1.46949	1.15621	3.44859e-10
ENSG00000197459	HIST1H2BH	54.2098	45.2771	42.7538	59.1604	4.94582	5.47594	3.61233	5.73283	10.511	6.11338	10.1481	11.1777	-3.25491	-3.44699	-2.58121	-2.25668	0.673699	1.19031	1.01812e-09
ENSG00000261655	CTD-3064M3.3	3.14376	4.90136	4.43537	4.28613	0.692869	1.31037	0.651741	0.979886	0.466807	0.863204	0.115638	0.177076	-2.00578	-2.41827	-2.59668	-4.89701	-0.590895	-2.47875	3.78944e-06
ENSG00000132780	NASP	176.263	164.037	160.392	170.173	43.2379	46.3042	43.1804	43.7911	37.32	18.7571	31.4917	44.1503	-1.92617	-1.92632	-2.60133	-2.12768	-0.675157	-0.201357	2.25331e-08
ENSG00000183801	OLFML1	4.90918	4.20025	5.23315	4.755	0.01	0.0356485	0.01	0.0373208	0.400033	1.08493	0.01	0.01	-7.64065	-7.7216	-2.61693	-8.96407	5.02372	-1.24248	1.68037e-05
ENSG00000152253	SPC25	61.6226	40.4157	47.6014	55.7453	15.3801	17.0326	15.9834	13.6523	12.6924	3.92707	11.3437	17.1188	-1.65448	-1.80208	-2.61816	-1.86036	-0.963686	-0.0582762	7.88168e-06
ENSG00000239474	KLHL41	6.63443	4.85557	3.82884	3.43537	0.707895	1.02853	1.22077	1.27255	0.786935	1.07791	0.649801	0.353791	-2.72619	-1.54273	-2.62325	-2.85563	0.102935	-1.3129	6.67352e-07
ENSG00000245864	CTC-467M3.1	40.2083	29.3236	27.3896	36.3441	5.60812	5.55562	5.2501	4.15446	6.18481	4.87968	7.35412	7.50755	-2.63886	-2.76063	-2.65174	-2.10046	-0.0128828	0.660163	1.40883e-09
ENSG00000161896	IP6K3	7.72676	8.63719	8.78632	10.1924	0.394334	0.607667	0.362684	0.45441	0.852373	1.72129	0.442411	0.697991	-4.02957	-4.53774	-2.66863	-4.05677	1.36094	0.48097	1.56911e-08
ENSG00000143228	NUF2	97.6525	88.1753	94.5529	93.7303	23.9789	27.507	26.904	26.013	22.3157	6.61928	16.9134	25.6409	-1.85172	-1.8311	-2.68308	-2.14553	-0.831361	-0.314428	3.23048e-06
ENSG00000065361	ERBB3	0.903578	0.741446	1.02831	0.949948	0.157219	0.141589	0.295773	0.103761	0.105923	0.143638	0.170556	0.147328	-2.46082	-2.30784	-2.72064	-2.63766	-0.259824	-0.329821	1.33456e-07
ENSG00000200174	Y_RNA	10.2853	10.6904	14.6258	17.7879	0.01	1.11353	0.01	2.33153	3.12389	0.01	6.19083	5.26666	-4.22261	-3.79108	-2.74269	-1.50031	1.47992	2.29077	0.000198943
ENSG00000134343	ANO3	0.902572	1.07608	1.36784	1.42666	0.430821	0.189684	0.379732	0.364067	0.147816	0.14578	0.0292937	0.149524	-1.673	-1.9096	-2.75261	-3.96602	-1.07961	-2.05642	1.05674e-06
ENSG00000081189	MEF2C	31.7092	32.7928	32.6051	36.0945	3.03207	3.20664	3.27862	2.87546	4.6308	4.44222	6.26856	6.30975	-3.37002	-3.48069	-2.82969	-2.44936	0.540335	1.03132	2.72521e-12
ENSG00000140451	PIF1	47.5829	39.0559	43.9039	46.143	9.98513	11.5753	10.9911	12.3112	7.60174	4.17309	3.85154	8.68501	-2.00662	-1.95021	-2.87931	-2.84454	-0.872683	-0.894331	2.61226e-08
ENSG00000111247	RAD51AP1	67.9824	60.6012	58.2836	61.8115	17.2104	17.2874	17.9072	18.1483	13.7612	3.29407	10.3261	15.0014	-1.89813	-1.73589	-2.91442	-2.2454	-1.01629	-0.509514	4.69337e-06
ENSG00000070182	SPTB	1.93577	1.70804	2.51794	2.35128	0.544104	0.580474	0.770859	0.850787	0.294674	0.183546	0.737652	0.800107	-1.69606	-1.58623	-2.9297	-1.66286	-1.23364	-0.0766291	5.00248e-05
ENSG00000141524	TMC6	14.0357	13.8486	12.0848	13.8134	0.912829	1.18687	1.16588	1.02067	1.82338	1.70704	3.86228	2.15186	-3.73119	-3.56613	-2.98154	-2.10642	0.749656	1.4597	2.24747e-09
ENSG00000231607	DLEU2	14.7041	15.4792	20.2596	19.2941	4.03389	5.20844	4.68976	5.07673	2.98113	0.828186	2.4547	2.59086	-1.70742	-2.0179	-2.98614	-2.97073	-1.27872	-0.952827	1.88825e-07
ENSG00000115085	ZAP70	0.704337	0.77391	0.685107	0.976228	0.193536	0.0239656	0.0750949	0.125449	0.134466	0.0442045	0.0666202	0.0680101	-2.76479	-3.05035	-3.04851	-3.62527	-0.283727	-0.574918	8.13189e-07
ENSG00000267374	LINC00669	9.79732	8.2234	10.0352	8.58064	1.77779	2.15741	2.06943	2.07424	1.3587	0.812111	1.38711	1.49935	-2.19514	-2.16755	-3.05335	-2.68916	-0.858204	-0.521606	9.49999e-10
ENSG00000104147	OIP5	67.1542	49.4735	50.9939	59.6815	20.2075	19.1264	17.493	20.8536	9.73057	3.65581	10.4683	13.3115	-1.56807	-1.52916	-3.12307	-2.21852	-1.55501	-0.68936	4.24497e-07
ENSG00000158402	CDC25C	62.3815	46.8453	51.3008	61.0735	19.8353	17.5156	16.6965	19.7705	8.96159	3.41642	8.13369	11.9599	-1.54811	-1.62365	-3.14147	-2.4835	-1.59336	-0.859857	4.76163e-07
ENSG00000183671	GPR1	3.08487	1.69749	3.00542	4.00447	0.567182	0.605094	1.12859	0.950219	0.404173	0.119581	0.280342	0.490613	-2.02841	-1.75364	-3.19076	-3.18467	-1.16235	-1.43104	1.39891e-06
ENSG00000273338	RP11-386I14.4	15.7479	9.20706	14.4899	10.7663	2.36642	1.17214	2.44855	1.84068	1.64415	1.081	5.43055	2.77193	-2.81809	-2.55785	-3.19492	-1.62251	-0.376824	0.93534	8.98878e-06
ENSG00000135476	ESPL1	50.3044	34.7409	35.7684	41.9506	11.1684	12.0973	10.045	10.7319	6.84164	2.1983	6.19199	10.8177	-1.87003	-1.90329	-3.23385	-2.19191	-1.36382	-0.288621	6.3763e-06
ENSG00000136770	DNAJC1	202.376	178.63	211.865	206.307	56.261	56.8608	68.649	70.2956	19.6477	19.648	27.8187	24.1832	-1.75193	-1.58959	-3.27737	-3.00746	-1.52543	-1.41787	1.87328e-11
ENSG00000164104	HMGB2	659.262	560.948	604.929	677.5	167.802	180.267	183.676	184.611	90.0657	35.4159	79.4286	117.578	-1.80969	-1.79998	-3.28158	-2.70256	-1.4719	-0.902584	3.43124e-07
ENSG00000170312	CDK1	201.207	165.484	163.079	166.459	48.0791	50.5432	49.4531	51.4053	29.0093	8.265	20.8763	37.8811	-1.89458	-1.70812	-3.29831	-2.4876	-1.40373	-0.779488	3.72696e-06
ENSG00000196562	SULF2	54.2	47.6789	54.6045	56.4779	13.7632	12.8431	14.8558	12.9063	3.26921	5.93925	7.22899	10.6868	-1.93702	-2.00044	-3.46775	-2.63233	-1.53074	-0.631883	2.06797e-07
ENSG00000100290	BIK	6.15177	8.74977	8.83811	8.00734	1.81641	1.41382	1.34246	1.88382	0.841342	0.474143	1.78644	0.01	-2.20575	-2.38441	-3.50179	-3.22915	-1.29604	-0.844731	9.8443e-06
ENSG00000129009	ISLR	24.0286	23.1739	23.4556	24.3576	2.63864	2.29293	2.05963	4.22487	1.67247	2.36841	2.71955	1.9087	-3.25875	-2.92754	-3.54612	-3.36887	-0.287377	-0.441334	4.72096e-10
ENSG00000129195	FAM64A	178.673	151.362	154.108	174.249	46.1207	47.0341	46.2711	47.8324	19.5165	8.48335	14.1923	23.8875	-1.82492	-1.80295	-3.55913	-3.10817	-1.73421	-1.30522	2.69593e-08
ENSG00000152413	HOMER1	22.964	20.0467	18.9459	22.2247	6.14812	6.28961	6.94359	6.04289	2.10324	1.52357	2.23161	2.61707	-1.78997	-1.66461	-3.56792	-3.08595	-1.77795	-1.42135	1.51461e-11
ENSG00000255438	CTD-2653D5.1	9.96036	10.0894	9.78605	10.1567	2.73979	2.66388	2.88737	3.26243	0.141005	1.48333	1.81635	1.90179	-1.89158	-1.69725	-3.62567	-2.42321	-1.73409	-0.725958	1.14074e-05
ENSG00000270110	RP5-1139B12.4	1.6155	2.23883	2.1058	1.53665	0.32368	0.01	0.01	0.01	0.29985	0.01	0.742792	0.01	-3.52994	-7.50877	-3.63684	-2.27459	-0.106893	5.23418	0.000175265
ENSG00000235601	RP11-231K24.2	0.845039	1.06653	0.777537	1.55018	0.01	0.0718828	0.0750802	0.15051	0.13444	0.01	0.01	0.0679968	-4.54506	-3.36714	-3.72622	-4.89936	0.818837	-1.53222	5.52798e-06
ENSG00000121211	MND1	66.6201	66.2764	63.9881	69.2528	11.2777	17.082	14.0367	14.8321	6.6621	2.76252	5.32611	7.27516	-2.22839	-2.20645	-3.81772	-3.4024	-1.58933	-1.19594	2.44929e-09
ENSG00000242583	RP11-379K17.9	2.61492	2.11392	2.67337	3.45457	0.01	0.01	0.01	0.01	0.323567	0.01	0.01	0.01	-7.88534	-8.25926	-3.82544	-8.25926	4.0599	0	7.3734e-06
ENSG00000251898	SCARNA11	14.3692	9.43272	11.8297	9.35171	0.909159	3.6026	0.01	1.8858	0.842226	0.830622	0.834548	0.01	-2.39932	-3.48192	-3.8307	-4.64847	-1.43138	-1.16655	1.43136e-05
ENSG00000128849	CGNL1	12.7155	7.76924	9.10837	10.8741	0.857162	0.509483	0.813	0.622281	0.569074	0.835325	1.90148	1.27179	-3.90584	-3.79933	-3.86653	-2.6547	0.0393142	1.14463	2.44883e-08
ENSG00000064989	CALCRL	23.1855	23.3157	28.3111	28.678	2.25396	1.97369	1.95736	2.48371	1.06265	2.05925	2.36455	1.50868	-3.45934	-3.68171	-3.89677	-3.87908	-0.437428	-0.19737	1.86249e-10
ENSG00000178718	RPP25	56.8746	60.2366	49.1965	52.9115	17.1133	15.3864	14.3924	16.3184	4.95889	2.85283	8.04057	11.7425	-1.84938	-1.73328	-3.9061	-2.36776	-2.05671	-0.634483	1.48592e-06
ENSG00000179399	GPC5	0.442893	0.920672	0.720987	1.00458	0.409558	0.0405725	0.0847543	0.01	0.01	0.0748358	0.0751895	0.01	-1.59897	-4.18674	-4.00657	-4.34025	-2.4076	-0.153516	0.000203649
ENSG00000105894	PTN	308.14	270.724	316.784	326.168	32.337	27.5295	25.3932	29.2701	16.6498	18.7945	37.5678	37.6752	-3.2734	-3.55607	-4.0296	-3.09508	-0.756194	0.460987	5.95801e-09
ENSG00000236714	AC005592.1	1.0575	1.43367	1.01533	1.22456	0.055273	0.109511	0.228765	0.171973	0.0512037	0.100997	0.050737	0.103591	-3.91818	-2.4827	-4.03278	-3.85936	-0.114607	-1.37666	1.37406e-07
ENSG00000205181	LINC00654	0.310488	0.169851	0.255614	0.310878	0.03929	0.0583833	0.0203268	0.0407481	0.01	0.017948	0.0180328	0.018409	-2.29802	-3.2134	-4.10324	-3.95839	-1.80522	-0.744983	1.16308e-06
ENSG00000164438	TLX3	1.17114	1.64688	1.71146	3.21087	0.165634	0.0820417	0.01	0.171781	0.0767198	0.0756628	0.01	0.01	-3.50816	-4.75907	-4.20891	-7.9432	-0.700752	-3.18413	1.04472e-06
ENSG00000144152	FBLN7	6.19372	4.68194	5.48309	4.93927	1.37259	1.09897	1.18676	1.32602	0.243856	0.343566	0.552305	0.669545	-2.13761	-2.05232	-4.21056	-3.09254	-2.07295	-1.04022	3.79915e-09
ENSG00000196502	SULT1A1	2.2084	2.48352	2.63159	3.0763	0.261131	0.186829	0.465333	0.315959	0.0268785	0.22532	0.173118	0.14954	-3.38873	-2.86902	-4.21755	-4.14488	-0.828815	-1.27586	4.9614e-08
ENSG00000256811	RP11-7M8.2	13.5084	13.0551	13.5196	18.2592	0.01	0.564462	0.01	0.01	0.01	1.30144	0.261517	0.266973	-5.53109	-10.6339	-4.34023	-5.91004	1.19086	4.72381	9.53452e-08
ENSG00000249906	RP5-1029K10.2	11.2878	8.14258	9.53349	13.4611	0.911393	1.50477	1.78126	2.10048	0.750485	0.185036	0.01	0.01	-3.00752	-2.56652	-4.3764	-10.1671	-1.36888	-7.60056	3.68272e-07
ENSG00000043462	LCP2	0.739645	0.946186	1.37421	1.54239	0.256491	0.101636	0.194621	0.106404	0.063362	0.0156223	0.0627845	0.112165	-2.23492	-3.27633	-4.41575	-4.05928	-2.18083	-0.782944	2.97613e-07
ENSG00000121316	PLBD1	2.46182	2.67166	2.13192	3.03039	0.217609	0.732946	0.315226	0.586782	0.120953	0.119287	0.239701	0.0815674	-2.4331	-2.51681	-4.41739	-4.00616	-1.98429	-1.48936	1.10062e-07
ENSG00000170381	SEMA3E	137.255	105.415	127.988	138.501	14.9885	12.7426	15.5465	16.5709	5.10927	5.30673	9.36851	12.0193	-3.12942	-3.05264	-4.54212	-3.63921	-1.4127	-0.586565	3.16175e-09
ENSG00000101306	MYLK2	2.73031	3.87959	3.65702	3.25454	0.415476	0.411587	0.300926	0.301627	0.269422	0.01	0.01	0.42827	-2.99856	-3.51985	-4.56411	-3.97912	-1.56555	-0.459268	2.59316e-06
ENSG00000272989	RP13-616I3.1	1.37138	2.04512	2.19449	2.04174	0.01	0.01	0.148332	0.223016	0.0664016	0.0654867	0.01	0.470183	-7.41638	-3.51193	-4.69513	-3.14112	2.72124	0.370809	1.20252e-05
ENSG00000250443	AC128709.1	1.37937	2.05705	2.20728	2.05364	0.01	0.01	0.149197	0.224317	0.0667888	0.0658686	0.01	0.472924	-7.42476	-3.51193	-4.69513	-3.1413	2.72963	0.370635	1.20252e-05
ENSG00000167895	TMC8	0.772483	0.62666	0.34672	0.573487	0.0452997	0.179503	0.11718	0.0704714	0.01	0.0413866	0.0831644	0.106124	-2.63781	-2.29391	-4.76701	-2.28137	-2.1292	0.0125363	1.57711e-05
ENSG00000175899	A2M	13.7589	6.5308	7.44172	9.04161	0.290521	0.211054	0.340684	0.281216	0.125595	0.619324	0.0533358	0.072598	-5.33814	-4.72818	-4.76752	-7.0322	0.570617	-2.30401	1.66501e-07
ENSG00000182759	MAFA	8.54373	15.6685	13.9084	17.7382	0.592551	0.83159	0.562022	0.512118	0.320207	0.451137	0.634577	0.0925451	-4.08757	-4.88079	-4.97222	-5.44371	-0.884645	-0.562913	4.21981e-09
ENSG00000169550	MUC15	1.70178	1.89293	2.38997	2.24349	0.01	0.01	0.01	0.01	0.0997469	0.01	0.01	0.0336332	-7.48973	-7.85595	-5.03363	-6.73052	2.45611	1.12543	2.14149e-07
ENSG00000154783	FGD5	0.823454	0.937399	1.29887	1.05678	0.094278	0.0311318	0.211358	0.114073	0.01	0.0430669	0.0432705	0.0147244	-3.81155	-2.85571	-5.05232	-5.34406	-1.24077	-2.48835	1.67893e-07
ENSG00000228421	AC005013.5	53.5257	46.5433	46.353	73.2086	1.89253	1.24988	0.217579	1.09043	0.974003	1.92117	9.65124	5.7145	-4.99298	-6.51424	-5.1112	-2.95996	-0.118226	3.55427	6.60803e-07
ENSG00000226741	CTA-929C8.6	0.325743	0.380894	0.28099	0.32921	0.0489492	0.01	0.0506479	0.0253829	0.01	0.01	0.0224661	0.0458695	-3.58343	-3.00462	-5.1429	-3.15857	-1.55947	-0.153947	5.7447e-06
ENSG00000189292	FAM150B	2.48801	3.80581	3.4123	3.92941	0.451467	0.614957	0.01	0.175583	0.104557	0.0515585	0.103604	0.0528829	-2.56115	-5.30598	-5.33325	-5.552	-2.77209	-0.246022	4.33597e-07
ENSG00000138653	NDST4	10.3434	8.36492	11.3748	11.2328	3.35795	3.09597	2.71767	1.99989	0.215595	0.243	1.77008	0.841192	-1.53543	-2.2607	-5.35032	-3.11399	-3.81488	-0.853288	1.03064e-05
ENSG00000231680	AP003774.6	2.29723	3.0389	4.70785	4.76751	0.01	0.248707	0.129885	0.01	0.01	0.114685	0.115227	0.01	-4.3664	-6.08187	-5.41944	-6.24156	-1.05303	-0.159695	2.76033e-07
ENSG00000197165	SULT1A2	1.44673	1.22176	2.07994	1.59114	0.108699	0.01	0.28118	0.0563668	0.0503485	0.01	0.0498895	0.0509303	-4.49064	-3.44305	-5.46656	-5.18635	-0.975924	-1.74331	4.4199e-07
ENSG00000213494	CCL14	0.462426	0.455342	0.49267	0.277804	0.01	0.01	0.01	0.01	0.01	0.01	0.01	0.01	-5.52006	-5.26767	-5.52006	-5.26767	0	0	3.85575e-05
ENSG00000183378	OVCH2	1.74888	1.12996	1.26125	1.57361	0.01	0.01	0.01	0.01	0.0526391	0.01	0.01	0.01	-7.16935	-7.14713	-5.52228	-7.14713	1.64706	0	2.76244e-07
ENSG00000187416	LHFPL3	0.536681	0.393754	0.406668	0.420401	0.0379514	0.112788	0.0785369	0.01	0.01	0.01	0.0348369	0.0355637	-2.62584	-3.22366	-5.53983	-3.55435	-2.91399	-0.330692	8.80685e-06
ENSG00000259803	SLC22A31	9.44881	11.2175	5.46368	6.76134	0.416841	0.464557	0.377394	0.756545	0.241346	0.190417	0.143487	0.146481	-4.55134	-3.43042	-5.5809	-5.3978	-1.02956	-1.96738	7.43845e-10
ENSG00000070159	PTPN3	2.17533	2.25039	1.92639	2.15659	0.527928	0.522986	0.660581	0.662118	0.0568676	0.0336505	0.653651	0.655783	-2.07427	-1.62614	-5.61156	-1.64068	-3.5373	-0.014541	0.000919824
ENSG00000176734	TRIL	138.409	123.432	152.686	165.908	2.69174	2.39495	2.86252	2.22297	2.12415	2.82355	16.6096	9.94943	-5.68582	-5.96919	-5.72579	-3.58445	-0.0399698	2.38474	5.9236e-07
ENSG00000255690	AC005013.1	138.149	122.696	152.394	165.309	2.6443	2.377	2.83741	2.18379	2.08672	2.77378	16.5416	9.79703	-5.69899	-5.9835	-5.74595	-3.59243	-0.0469556	2.39107	6.18333e-07
ENSG00000248746	ACTN3	24.2145	30.1532	28.846	29.5419	0.738288	1.21896	2.00072	1.7866	0.227978	0.706631	0.258171	0.164723	-4.79585	-3.94642	-5.86225	-7.10923	-1.06639	-3.16281	1.30523e-09
ENSG00000157554	ERG	1.60708	1.55011	1.49054	1.0884	0.0154557	0.01	0.0159921	0.01	0.01	0.0423617	0.0283746	0.0144833	-6.95451	-6.63256	-5.91399	-5.91107	1.04052	0.721491	1.30519e-09
ENSG00000139330	KERA	0.713599	0.543916	0.612823	1.35754	0.01	0.01	0.01	0.01	0.01	0.01	0.01	0.01	-5.97443	-6.62232	-5.97443	-6.62232	0	0	9.87439e-05
ENSG00000014257	ACPP	0.441536	0.86686	0.609399	0.653311	0.01	0.01	0.01	0.01	0.01	0.01	0.0270686	0.01	-6.03166	-5.98038	-6.03166	-5.09018	0	0.890197	1.53683e-06
ENSG00000115353	TACR1	0.639442	0.704907	0.980605	0.903134	0.01	0.0692285	0.01	0.0241587	0.01	0.01	0.01	0.0218287	-4.08475	-5.7852	-6.07076	-5.88713	-1.98602	-0.101927	1.06918e-07
ENSG00000198842	DUSP27	0.931989	0.471928	0.725612	0.750116	0.01	0.01	0.01	0.01	0.01	0.01	0.01	0.01	-6.13331	-6.20528	-6.13331	-6.20528	0	0	7.34607e-06
ENSG00000130595	TNNT3	1.86214	2.05902	1.34884	1.95968	0.0476293	0.235917	0.0985645	0.0493969	0.0441228	0.01	0.0437206	0.01	-3.78962	-4.48289	-6.1789	-5.94457	-2.38928	-1.46167	3.60696e-08
ENSG00000204103	MAFB	111.462	135.135	151.593	179.635	4.2272	4.58474	5.84444	5.40451	0.877722	2.33054	0.167254	0.102446	-4.80655	-4.87996	-6.26422	-10.2623	-1.45767	-5.38229	4.40888e-08
ENSG00000116329	OPRD1	0.869673	0.783402	0.586816	0.992672	0.139398	0.414278	0.288471	0.01	0.01	0.01	0.191937	0.01	-1.57804	-2.4038	-6.36901	-2.96748	-4.79097	-0.563685	0.000484797
ENSG00000117148	ACTL8	1.27116	0.517	0.559382	0.841125	0.01	0.01	0.01	0.01	0.01	0.01	0.121976	0.186781	-6.48233	-6.12981	-6.48233	-2.18141	0	3.9484	9.23361e-05
ENSG00000256463	SALL3	1.16	0.761486	1.25459	1.10338	0.01	0.0242359	0.01	0.0761185	0.01	0.01	0.01	0.01	-5.81057	-4.77508	-6.58608	-6.8814	-0.77551	-2.10632	5.02298e-07
ENSG00000184347	SLIT3	13.1096	11.4407	13.0197	14.688	0.672831	0.837439	1.09782	0.984078	0.167811	0.0866897	2.16165	1.8915	-4.02286	-3.73431	-6.59193	-2.77317	-2.56907	0.961141	6.35492e-05
ENSG00000188937	NYX	0.929398	1.03756	0.981847	0.982262	0.01	0.0409934	0.01	0.01	0.01	0.01	0.01	0.01	-5.26951	-6.61773	-6.61982	-6.61773	-1.35031	0	2.89933e-07
ENSG00000254042	CTC-558O2.1	3.667	2.98151	3.78223	3.40363	0.284406	0.457834	0.588553	0.258091	0.0329335	0.0324798	0.554766	0.599654	-3.16307	-3.08533	-6.6673	-2.63799	-3.50423	0.447341	8.84443e-06
ENSG00000107623	GDF10	3.6823	2.21811	3.19565	5.17426	0.01	0.0498325	0.104098	0.01	0.0466	0.01	0.01	0.01	-6.62374	-6.19686	-6.70387	-8.70907	-0.0801276	-2.5122	6.60075e-09
ENSG00000166292	TMEM100	20.422	16.4072	17.8788	17.8093	0.127645	0.421501	0.3522	0.35302	0.0788319	0.233237	0.35151	0.2791	-6.06752	-5.66123	-6.88284	-5.82255	-0.815325	-0.161325	1.30936e-11
ENSG00000172752	COL6A5	1.66221	0.880558	1.86492	1.50968	0.0128918	0.0255423	0.053357	0.0267406	0.01	0.01	0.01	0.01	-6.04787	-5.39681	-6.99026	-7.39857	-0.942389	-2.00176	1.73892e-08
ENSG00000267596	CCL15	1.18147	1.36444	1.38906	0.936503	0.01	0.01	0.01	0.01	0.01	0.01	0.01	0.01	-6.99204	-6.86144	-6.99204	-6.86144	0	0	2.30188e-05
ENSG00000254192	CTC-558O2.2	18.539	19.1372	25.2366	22.707	0.152649	0.7561	1.73741	1.26651	0.141411	0.139462	2.24195	4.57744	-5.37363	-3.99642	-7.06759	-2.81362	-1.69396	1.18279	2.12139e-05
ENSG00000188517	COL25A1	64.0608	45.3517	47.0661	50.76	1.81979	1.52541	1.44842	2.01176	0.389034	0.365404	3.35925	2.60479	-5.03154	-4.8213	-7.18016	-4.03586	-2.14862	0.785443	5.9286e-07
ENSG00000130201	EXOC3L2	49.0715	58.8128	58.0442	62.1596	0.215036	0.142015	0.296665	0.0743388	0.332008	0.39292	0.921148	0.201507	-8.23914	-8.33983	-7.21743	-6.74242	1.02171	1.59741	3.36382e-12
ENSG00000164318	EGFLAM	7.63673	5.65897	6.2827	7.6913	0.0216013	0.0427981	0.0894037	0.0448059	0.0400219	0.0394705	0.0198285	0.01	-7.6897	-6.70211	-7.38593	-8.87184	0.303771	-2.16972	4.69864e-12
ENSG00000227718	AC016730.1	1.48346	1.92736	2.72992	1.88141	0.01	0.01	0.46131	0.01	0.01	0.01	0.01	0.01	-7.41398	-3.29044	-7.41398	-7.84904	0	-4.5586	5.59248e-05
ENSG00000161574	CCL15-CCL14	1.86649	1.83789	1.98856	1.1213	0.01	0.01	0.01	0.01	0.01	0.01	0.01	0.01	-7.53309	-7.2807	-7.53309	-7.2807	0	0	3.85575e-05
ENSG00000116996	ZP4	2.57276	1.24791	1.99901	1.90337	0.01	0.01	0.01	0.213843	0.01	0.01	0.01	0.01	-7.57768	-4.1238	-7.57768	-7.60821	0	-3.48441	3.94652e-06
ENSG00000100122	CRYBB1	1.58667	2.32822	1.37404	1.68678	0.224402	0.01	0.01	0.01	0.01	0.01	0.102993	0.105142	-4.06191	-7.25778	-7.61283	-3.87833	-3.55091	3.37945	2.35433e-06
ENSG00000173890	GPR160	50.3654	54.6032	54.4727	58.6166	0.19415	0.302237	0.31568	0.258885	0.154162	0.354757	0.254595	0.311888	-7.72428	-7.62078	-7.68831	-7.64121	0.0359729	-0.0204373	2.54358e-14
ENSG00000196431	CRYBA4	1.6487	3.29544	2.68392	4.82532	0.457382	0.01	0.01	0.01	0.01	0.01	0.01	0.01	-3.40305	-8.55252	-7.94958	-8.55252	-4.54653	0	3.04517e-05
ENSG00000137558	PI15	21.1715	11.4284	13.7274	13.986	0.397408	0.256753	0.143026	0.179198	0.0320131	0.094716	0.174467	0.0809576	-5.63908	-6.42637	-8.00698	-6.76154	-2.3679	-0.335169	4.56299e-11
ENSG00000253660	CTC-353G13.1	2.48213	3.86984	2.85482	4.72197	0.01	0.369497	0.192966	0.193415	0.01	0.01	0.513568	0.01	-4.06504	-4.29349	-8.31106	-3.85514	-4.24602	0.438351	5.33079e-06
ENSG00000145692	BHMT	6.52712	7.94024	12.1192	10.9137	0.246306	0.139429	0.0364077	0.01	0.01	0.032147	0.01	0.01	-5.22905	-8.95511	-8.42316	-10.1695	-3.19411	-1.21436	1.94019e-09
ENSG00000164120	HPGD	4.27858	4.58244	5.11784	5.83921	0.01	0.0443076	0.0694176	0.01	0.01	0.01	0.01	0.01	-7.35018	-7.10819	-8.79133	-9.09764	-1.44115	-1.98946	6.70546e-09
ENSG00000251636	EMCN-IT1	5.77347	3.77832	4.52528	3.45773	0.01	0.254653	0.531961	0.01	0.01	0.01	0.235964	0.01	-5.1736	-3.88067	-8.89963	-5.02041	-3.72603	-1.13974	7.88655e-07
ENSG00000257319	RP11-478B9.1	4.53462	5.35592	6.25858	10.1951	0.01	0.01	0.256386	0.01	0.01	0.01	0.01	0.01	-8.94991	-5.94874	-8.94991	-9.68419	0	-3.73545	1.22318e-06
ENSG00000235857	CTBP2P1	7.13676	3.92709	5.02157	4.39252	2.0187	0.999904	0.522191	1.04681	0.01	0.01	0.926519	1.41877	-1.8739	-2.58497	-9.11164	-2.00505	-7.23774	0.579921	0.000188769
ENSG00000223552	RP11-24F11.2	3.60614	8.47411	7.06895	10.2904	0.01	0.01	0.01	0.01	0.01	0.01	0.01	0.01	-9.23843	-9.7615	-9.23843	-9.7615	0	0	2.39255e-05
ENSG00000249491	EGFLAM-AS1	5.59323	7.75136	6.57601	9.16264	0.01	0.01	0.01	0.01	0.01	0.01	0.01	0.01	-9.38204	-9.6201	-9.38204	-9.6201	0	0	1.36885e-05
ENSG00000198865	CCDC152	52.6408	49.604	65.0408	71.2578	2.34246	2.60613	3.5424	3.06477	0.0333846	0.0987741	4.66433	4.69409	-4.36887	-4.36659	-9.59554	-3.86436	-5.22667	0.502232	2.55553e-05
ENSG00000231486	AC096579.7	7.22285	8.85863	9.10486	9.89326	0.01	0.01	0.01	0.01	0.01	0.01	0.01	0.01	-9.65118	-9.89164	-9.65118	-9.89164	0	0	2.40627e-07
ENSG00000197991	PCDH20	73.4688	56.5821	64.3663	72.4907	0.596051	0.521005	0.779991	0.781806	0.0649611	0.0800827	1.20692	0.394271	-6.86323	-6.45332	-9.80837	-6.41738	-2.94514	0.035937	1.43319e-08
ENSG00000169442	CD52	7.59025	11.0906	9.10948	5.85954	0.01	0.01	0.136831	0.137149	0.01	0.01	0.01	0.01	-9.86734	-5.77177	-9.86734	-9.54776	0	-3.776	9.36033e-08
ENSG00000185610	DBX2	7.03772	11.7343	11.6695	12.7957	0.01	0.01	0.01	0.0457001	0.01	0.01	0.01	0.01	-9.87437	-8.77884	-9.87437	-10.2565	0	-1.47768	3.75243e-09
ENSG00000250722	SEPP1	42.2046	41.3859	51.1953	56.6566	1.73904	2.00271	2.6541	2.34465	0.0201376	0.0595805	1.31697	1.24259	-4.48156	-4.43134	-10.0342	-5.39701	-5.55266	-0.965674	5.19124e-07
ENSG00000251733	SCARNA8	22.7691	13.057	12.2812	8.96183	3.77544	0.935025	1.95323	2.93667	0.01	0.01	0.866401	2.65343	-2.92707	-2.11911	-10.8068	-2.59341	-7.87973	-0.474297	2.92006e-05
ENSG00000221303	SNORA79	27.1827	10.6904	27.7152	23.7595	0.883183	0.874916	0.01	0.01	0.01	0.01	0.01	0.01	-4.42908	-11.3296	-10.887	-11.3296	-6.45787	0	1.88959e-06
ENSG00000259180	RP11-420M1.2	26.2785	15.5657	16.1195	18.8141	4.41591	8.41265	4.92064	3.87521	0.01	0.01	2.49447	1.90989	-1.70567	-1.98972	-11.0308	-2.98761	-9.32514	-0.997891	1.56871e-05
ENSG00000211592	IGKC	18.4861	23.7111	23.5236	25.0663	0.01	0.01	0.01	0.01	0.01	0.01	0.01	0.01	-11.0429	-11.2464	-11.0429	-11.2464	0	0	2.85781e-07
ENSG00000167281	RBFOX3	0.214554	0.138051	0.263221	0.194364	10.3785	10.111	11.8062	12.4833	0.0682682	0.0561064	0.033823	0.0460381	5.86069	5.73015	-1.50336	-2.51848	-7.36405	-8.24863	3.56929e-13
ENSG00000186417	GLDN	0.215957	0.239427	0.291436	0.273889	1.24615	1.20019	1.54011	1.38215	0.0481003	0.110688	0.0317745	0.01	2.42547	2.36993	-1.51998	-3.75839	-3.94545	-6.12832	6.25876e-07
ENSG00000002746	HECW1	0.508191	0.52055	0.372721	0.644516	4.70145	3.91191	4.35159	4.60046	0.106628	0.250763	0.105656	0.0331877	3.0657	3.13756	-1.52531	-2.87313	-4.591	-6.01069	4.06692e-08
ENSG00000136828	RALGPS1	2.65283	1.91282	1.9095	2.11365	18.6404	17.1836	17.8748	16.159	0.512373	1.05363	0.205242	0.49624	2.97203	3.08057	-1.54373	-2.51985	-4.51576	-5.60042	6.40988e-08
ENSG00000232104	RP11-509J21.1	0.924524	1.68164	1.48868	0.989326	5.97389	2.89017	4.59997	5.76334	0.386099	0.507706	0.38258	0.01	1.76604	2.06424	-1.5439	-2.65812	-3.30994	-4.72236	3.36135e-05
ENSG00000129993	CBFA2T3	0.120558	0.214811	0.190162	0.147438	20.4558	19.0747	20.373	18.7026	0.0958998	0.0189157	0.0570154	0.0388032	6.88107	6.85481	-1.54643	-1.81694	-8.4275	-8.67175	4.12346e-13
ENSG00000140067	FAM181A	0.01	0.0485487	0.386801	0.133288	6.40127	7.06449	4.35752	6.34766	0.01	0.01	0.01	0.01	7.84544	4.36341	-1.54964	-4.70069	-9.39508	-9.06409	1.61347e-06
ENSG00000268635	DKFZP434E1119	3.03585	2.57108	2.22433	2.78072	17.6733	15.198	14.7902	14.7194	0.939131	0.926192	0.186114	0.221663	2.55155	2.55973	-1.58778	-3.61753	-4.13933	-6.17726	2.50223e-07
ENSG00000243888	RP11-548B3.3	22.2246	21.7569	14.7425	19.9108	62.1335	75.0933	78.1121	77.6495	6.9071	7.66343	7.12931	3.78458	1.64159	2.16827	-1.59384	-1.66683	-3.23544	-3.8351	2.2562e-08
ENSG00000152954	NRSN1	0.0505795	0.01	0.0232696	0.0481108	25.8114	23.6122	24.9142	24.5938	0.01	0.01	0.01	0.01	9.67216	9.43792	-1.59883	-1.83553	-11.271	-11.2734	2.13445e-11
ENSG00000171291	ZNF439	0.592587	0.739111	0.436201	0.676397	2.58832	2.18771	3.26783	2.33959	0.219978	0.216948	0.0217973	0.0667562	1.84254	2.33341	-1.60781	-3.65124	-3.45035	-5.98464	1.48876e-06
ENSG00000178522	AMBN	0.0512984	0.01	0.0472007	0.0975894	9.4353	9.10262	8.678	7.483	0.01	0.01	0.01	0.01	8.24041	6.80241	-1.61585	-2.85589	-9.85626	-9.6583	3.51111e-09
ENSG00000187260	WDR86	10.1678	11.9225	10.6955	10.9838	47.6954	45.9103	53.9584	57.1417	3.21494	3.98435	3.69307	3.77012	2.08318	2.35747	-1.61749	-1.53845	-3.70067	-3.89592	1.02833e-11
ENSG00000137869	CYP19A1	0.048763	0.0126709	0.0560847	0.0231915	0.175862	0.159698	0.181965	0.243185	0.01	0.01	0.01	0.01	2.44946	2.42301	-1.61903	-1.98689	-4.0685	-4.4099	4.28937e-05
ENSG00000182013	PNMAL1	49.8126	39.5395	37.8959	39.7316	164.225	147.874	161.375	152.244	12.3964	16.6574	12.0991	14.2325	1.80443	2.01437	-1.62078	-1.55977	-3.42521	-3.57414	2.5602e-11
ENSG00000184916	JAG2	2.28313	2.47332	2.33745	2.41639	16.5647	15.3565	16.2396	18.1817	0.483454	1.05954	1.20649	0.452816	2.74656	2.85613	-1.62415	-1.51852	-4.37071	-4.37465	9.39849e-09
ENSG00000172382	PRSS27	0.660096	0.938865	1.13482	0.809632	3.80062	3.35131	3.78127	4.48311	0.212797	0.305258	0.210857	0.254394	2.1612	2.08755	-1.62596	-2.06328	-3.78716	-4.15083	1.29944e-08
ENSG00000047365	ARAP2	0.297934	0.129028	0.137067	0.1968	3.73086	3.07502	3.35592	3.5185	0.101382	0.0363581	0.0913249	0.00932302	3.9946	4.36389	-1.63216	-1.72996	-5.62677	-6.09385	4.44603e-09
ENSG00000140955	ADAD2	0.01	0.0520089	0.138123	0.0713938	0.451152	0.715086	0.622411	0.842211	0.01	0.01	0.01	0.01	4.23324	2.80539	-1.63247	-3.38899	-5.86572	-6.19438	5.41847e-05
ENSG00000270433	RP11-124D2.7	0.105653	0.109814	0.923528	0.301489	1.0796	1.19531	1.77416	1.77829	0.0588304	0.01	0.0582941	0.01	3.40027	1.53601	-1.64635	-4.1649	-5.04662	-5.70091	0.000262847
ENSG00000182771	GRID1	0.119339	0.0885995	0.109806	0.0324327	1.08623	1.3197	0.805834	0.743942	0.01	0.0561734	0.01	0.0384109	3.53236	3.44567	-1.65184	-1.55491	-5.1842	-5.00058	1.47036e-06
ENSG00000215475	SIAH3	0.01	0.0530542	0.234832	0.097105	16.5065	13.5862	11.4921	10.6915	0.01	0.01	0.01	0.01	8.89861	6.06244	-1.65659	-4.05284	-10.5552	-10.1153	9.70504e-08
ENSG00000186462	NAP1L2	0.242008	0.209616	0.185563	0.230196	8.43699	8.16588	9.93391	8.24723	0.01	0.1329	0.01	0.01	5.20017	5.45055	-1.66012	-4.37768	-6.86029	-9.82823	7.48976e-10
ENSG00000152078	TMEM56	0.472442	0.447721	0.409132	0.37008	2.22168	2.38291	2.48891	1.68046	0.0154746	0.274705	0.0766675	0.0939204	2.32311	2.41974	-1.66495	-2.1915	-3.98806	-4.61124	2.55965e-06
ENSG00000198221	MLLT4-AS1	1.08863	1.3578	1.84306	0.786974	10.2602	12.0829	12.7828	17.6444	0.436446	0.334781	0.76883	0.147163	3.19108	3.53221	-1.66545	-1.52167	-4.85653	-5.05388	6.84129e-08
ENSG00000129991	TNNI3	0.303701	0.0526103	0.13972	0.144439	2.92076	2.17007	3.14805	2.90294	0.0563695	0.0555928	0.0558556	0.01	3.83669	4.4124	-1.67012	-2.10932	-5.50682	-6.52172	2.98216e-08
ENSG00000218416	AC110619.2	0.438233	0.63769	0.403227	1.04211	2.00193	2.13976	2.94358	2.45869	0.0488039	0.288789	0.096718	0.197472	1.94464	1.90216	-1.67222	-2.29659	-3.61686	-4.19875	8.15804e-06
ENSG00000256341	RP11-21A7A.3	1.60988	4.09025	2.96256	2.38203	31.1802	27.2669	36.9348	36.1286	0.996024	0.785841	1.18433	0.604521	3.35807	3.773	-1.67761	-1.57904	-5.03567	-5.35204	3.51072e-09
ENSG00000176387	HSD11B2	2.11553	1.83904	1.73419	1.24395	11.1901	11.8182	11.3392	12.1808	0.428357	0.802666	0.0424452	0.01	2.54056	2.9814	-1.68366	-5.82746	-4.22423	-8.80886	5.25648e-06
ENSG00000170616	SCRT1	0.0816728	0.113186	0.100198	0.284851	82.3104	81.0536	83.7785	88.5218	0.0303184	0.0299006	0.01	0.01	9.71144	8.80567	-1.69414	-4.26697	-11.4056	-13.0726	6.34732e-14
ENSG00000079101	CLUL1	0.668573	0.389147	0.688987	0.686817	3.9222	3.69439	3.22669	3.56762	0.238258	0.0881159	0.118043	0.241012	2.84819	2.30405	-1.69636	-1.938	-4.54455	-4.24205	1.68027e-08
ENSG00000166793	YPEL4	2.39837	1.91756	3.96798	3.11487	25.1172	20.7077	27.8822	26.1357	0.744785	0.582553	0.508962	0.597518	3.40839	2.93103	-1.70114	-2.67835	-5.10952	-5.60939	2.34768e-10
ENSG00000246214	RP11-260E18.1	0.245767	0.01	0.0565337	0.01	1.47725	2.19513	3.13346	2.68112	0.0684246	0.01	0.01	0.01	3.84381	6.44945	-1.70545	-1.73408	-5.54926	-8.18353	1.58744e-06
ENSG00000167972	ABCA3	4.62603	3.43836	2.98319	3.47256	74.4345	67.3654	67.3782	66.3355	0.352259	2.11338	1.23621	0.920518	4.13615	4.37242	-1.7096	-1.58174	-5.84575	-5.95416	2.14263e-08
ENSG00000272168	CASC15	0.184308	0.181989	0.305254	0.219141	2.00518	2.28273	2.69377	2.47024	0.01	0.101214	0.122031	0.0622882	3.54919	3.29976	-1.71968	-1.50845	-5.26887	-4.80822	2.043e-07
ENSG00000230002	ALMS1-IT1	2.05023	1.87729	2.06612	2.50736	7.39409	5.8134	7.22566	6.69472	0.706718	0.482526	0.808011	0.714886	1.74966	1.60584	-1.72358	-1.58647	-3.47324	-3.19231	1.18805e-08
ENSG00000196353	CPNE4	0.0324356	0.0337131	0.0298446	0.061705	0.662875	0.90775	0.706052	0.889674	0.01	0.01	0.0178963	0.01	4.56948	4.12351	-1.72571	-1.71448	-6.29519	-5.83799	1.76255e-08
ENSG00000128655	PDE11A	0.0246888	0.0684296	0.0681498	0.0547954	0.771672	0.441028	0.675614	0.595103	0.01	0.0180772	0.01	0.0185416	3.70301	3.36955	-1.72967	-2.10688	-5.43268	-5.47643	1.99952e-07
ENSG00000207332	RNU6-146P	74.283	42.5637	58.7102	72.4691	239.277	200.745	272.458	222.035	22.2722	12.5516	24.171	16.0926	1.91296	1.91441	-1.74647	-1.70399	-3.65943	-3.6184	1.92386e-08
ENSG00000122824	NUDT10	5.85873	4.94445	3.59382	4.57254	32.2056	32.7391	31.081	31.6528	1.84027	1.37493	1.71298	1.1282	2.58776	2.94148	-1.74848	-1.5232	-4.33623	-4.46468	8.64566e-11
ENSG00000131242	RAB11FIP4	2.33332	2.21675	1.58098	1.60257	13.1972	12.0784	12.1001	9.77762	0.923251	0.425894	0.272975	0.384113	2.47379	2.78075	-1.75384	-2.27648	-4.22763	-5.05723	1.12518e-07
ENSG00000250056	LINC01018	0.0584726	0.01	0.107604	0.0834281	1.01925	0.696352	0.945524	1.05708	0.01	0.01	0.01	0.01	4.64704	3.38999	-1.77553	-3.25574	-6.42257	-6.64573	5.64475e-06
ENSG00000270223	RP13-36G14.4	4.546	4.13442	5.22858	4.10792	17.2147	21.114	20.3568	22.3879	1.5188	0.998582	1.63037	1.28029	2.14259	2.19479	-1.78584	-1.68154	-3.92843	-3.87633	2.35964e-09
ENSG00000071073	MGAT4A	0.0534026	0.0222023	0.029482	0.0812738	6.53537	5.58384	6.85517	6.00558	0.0118944	0.01	0.0117859	0.0120318	7.3246	6.85945	-1.78792	-2.21727	-9.11252	-9.07672	2.5045e-12
ENSG00000144285	SCN1A	0.148582	0.0712774	0.136714	0.0543579	0.728216	0.775845	0.469153	0.740992	0.0381852	0.025106	0.0126124	0.0128755	2.77421	2.663	-1.79651	-2.90623	-4.57071	-5.56923	3.90379e-07
ENSG00000215397	SCRT2	0.01	0.0597731	0.01	0.082052	34.152	35.1679	27.0752	34.595	0.01	0.01	0.01	0.01	9.95638	9.38791	-1.80267	-2.20245	-11.7591	-11.5904	3.86389e-10
ENSG00000106415	GLCCI1	24.395	17.8872	20.2333	21.9255	73.8102	69.3122	80.72	74.8732	5.78952	6.26761	4.26959	4.77939	1.75913	1.88388	-1.81016	-2.22001	-3.56929	-4.10388	3.06973e-11
ENSG00000226122	AC018705.5	0.01	0.0601938	0.01	0.220345	3.34177	3.86224	3.38571	2.88816	0.01	0.01	0.01	0.01	6.68131	4.76749	-1.81134	-3.52573	-8.49266	-8.29321	1.59541e-06
ENSG00000253563	NKX2-1-AS1	0.01	0.0602277	0.0533168	0.275587	7.59288	8.00487	6.2707	5.56284	0.01	0.01	0.01	0.01	7.79508	5.16907	-1.81204	-4.03959	-9.60712	-9.20867	1.96053e-07
ENSG00000007350	TKTL1	0.028179	0.117155	0.025928	0.107215	1.21952	1.14099	0.701023	0.456725	0.0313816	0.01	0.0310955	0.01	4.02165	3.12028	-1.81231	-1.69592	-5.83396	-4.8162	6.87725e-06
ENSG00000166546	BEAN1	0.11484	0.164124	0.224541	0.177506	1.32878	0.888959	1.28562	1.48548	0.0319728	0.0472985	0.0633628	0.0646847	2.99094	2.78502	-1.8152	-1.65069	-4.80615	-4.43571	2.67953e-08
ENSG00000142235	LMTK3	3.5659	3.78917	3.70264	3.92243	72.3481	63.4861	69.7296	71.854	0.776486	1.31278	1.31898	1.09964	4.20696	4.21476	-1.81574	-1.65656	-6.02271	-5.87132	2.99659e-13
ENSG00000265945	RN7SL721P	1.39462	0.01	1.60402	0.01	5.44879	7.88907	12.1431	6.0857	0.38828	0.01	0.01	0.392768	3.24727	3.49749	-1.81832	-2.00264	-5.0656	-5.50013	0.000114171
ENSG00000105514	RAB3D	11.6196	11.811	10.6914	12.315	44.4251	45.7286	49.6743	48.3964	2.95628	3.63164	3.0835	3.25276	1.94399	2.09179	-1.8305	-1.86033	-3.77449	-3.95212	1.38568e-12
ENSG00000176490	DIRAS1	4.75162	3.58904	3.42161	4.35127	81.9928	74.231	75.9177	77.1982	1.24896	1.06968	1.20501	0.598449	4.22731	4.30003	-1.84688	-2.10768	-6.07419	-6.40772	9.0646e-13
ENSG00000183762	KREMEN1	4.21625	3.12256	3.67777	4.07179	14.7563	14.7563	16.4873	15.7219	1.10565	0.920484	0.825237	1.00223	2.00771	2.05528	-1.85682	-2.08427	-3.86453	-4.13955	3.95261e-12
ENSG00000119950	MXI1	21.3431	19.5616	16.4953	18.0504	62.7487	58.838	66.1761	63.2961	5.51953	5.73773	6.45466	4.70307	1.57165	1.90606	-1.86141	-1.63046	-3.43306	-3.53653	1.85527e-11
ENSG00000054690	PLEKHH1	1.69251	1.47256	1.50482	1.7727	10.882	10.1007	9.8522	9.78029	0.571814	0.292411	0.556108	0.449884	2.72889	2.58257	-1.87276	-1.70399	-4.60165	-4.28655	4.17257e-11
ENSG00000231249	ITPR1-AS1	1.43851	0.498388	0.6618	0.912199	2.59396	2.99796	3.42954	2.83969	0.1335	0.394981	0.132283	0.405128	1.5296	1.99385	-1.87382	-1.55034	-3.40342	-3.54419	2.2273e-05
ENSG00000109819	PPARGC1A	0.391412	0.162731	0.288117	0.223385	1.58807	1.73635	1.98399	1.7202	0.0326922	0.11822	0.0215962	0.0110234	2.58477	2.85635	-1.87655	-3.97093	-4.46132	-6.82728	2.21047e-07
ENSG00000153982	GDPD1	4.81367	4.7513	4.49288	4.05168	23.8965	23.8378	25.8027	28.367	0.925598	1.67355	1.18467	1.28741	2.31919	2.66441	-1.87972	-1.78929	-4.19891	-4.45369	9.79157e-11
ENSG00000269609	RP11-18I14.10	3.81611	3.24868	3.3608	3.81999	12.9325	13.0063	13.4266	15.0891	1.27495	0.638669	0.922427	1.08497	1.87639	1.98954	-1.88435	-1.83882	-3.76074	-3.82836	3.78964e-10
ENSG00000154646	TMPRSS15	0.048596	0.0252549	0.0447141	0.0924482	0.554989	0.405111	0.66492	0.848231	0.01	0.01	0.0268128	0.01	3.7005	3.4636	-1.88462	-1.8976	-5.58511	-5.3612	1.28807e-06
ENSG00000267767	CTC-523E23.4	0.272339	0.283065	0.41764	0.345396	10.3675	9.13527	11.1225	8.54519	0.0505484	0.099704	0.01	0.01	5.13399	4.68793	-1.88615	-5.25368	-7.02014	-9.94161	2.50355e-10
ENSG00000269813	CTD-3193O13.14	30.3885	26.3211	31.5458	27.423	145.892	146.383	142.717	155.678	8.46054	6.84634	9.88813	8.55832	2.36566	2.3392	-1.88941	-1.67661	-4.25507	-4.01581	9.69912e-12
ENSG00000163013	FBXO41	4.68323	4.0498	3.21141	3.94762	27.5853	22.8381	22.9067	22.0264	0.989387	1.36606	0.924347	1.02942	2.52954	2.64995	-1.89048	-1.87351	-4.42002	-4.52345	2.24362e-11
ENSG00000100218	RTDR1	4.64444	3.37916	2.83601	3.89566	17.3591	15.3865	19.3796	17.7401	1.1285	1.02021	0.372738	0.380514	2.02898	2.46315	-1.90078	-3.15976	-3.92976	-5.62291	2.4783e-08
ENSG00000221857	CTD-2527I21.4	0.139937	1.01814	0.77255	0.532426	13.6262	12.1655	15.6657	15.0043	0.15584	0.153693	0.15442	0.157641	4.47711	4.55473	-1.90356	-2.06412	-6.38067	-6.61886	4.00269e-09
ENSG00000076554	TPD52	5.48732	6.02385	4.32284	5.23123	29.707	28.4156	34.0663	30.6403	1.89508	1.17827	1.31991	1.52803	2.33606	2.75973	-1.90515	-1.7462	-4.24121	-4.50592	2.18439e-11
ENSG00000151640	DPYSL4	44.6583	35.7469	33.9991	37.3652	138.167	135.331	141.069	160.414	11.4687	9.99466	7.9692	10.2149	1.76617	2.0788	-1.90541	-1.97252	-3.67158	-4.05132	6.85159e-12
ENSG00000163630	SYNPR	0.0243497	0.0506175	0.0896187	0.0231613	4.65427	4.14674	6.26962	6.19314	0.01	0.01	0.01	0.01	6.87526	6.78797	-1.90626	-2.49544	-8.78153	-9.28341	4.73408e-09
ENSG00000138944	KIAA1644	1.26453	1.01346	1.00932	1.10137	27.7291	25.1835	24.5602	22.243	0.373269	0.234262	0.0672485	0.137303	4.53778	4.47083	-1.90673	-3.36717	-6.44451	-7.838	3.72515e-11
ENSG00000124613	ZNF391	6.63844	5.77203	5.77534	5.48466	18.0839	18.244	20.3788	20.0549	1.44541	1.84613	1.33832	1.60593	1.54952	1.84435	-1.91472	-1.93524	-3.46424	-3.77959	3.63476e-11
ENSG00000188828	GLRA4	0.0377859	0.314193	0.104303	0.0718834	0.454245	0.629991	0.705015	0.895097	0.01	0.0830012	0.01	0.0425667	1.62312	3.183	-1.92017	-1.74488	-3.54329	-4.92788	0.0004223
ENSG00000099889	ARVCF	19.5972	18.9426	18.3012	20.7641	55.5866	56.5699	56.537	59.9309	4.52384	5.64723	5.9768	6.86418	1.54109	1.57597	-1.92188	-1.60513	-3.46297	-3.18111	2.50656e-11
ENSG00000162374	ELAVL4	0.0296578	0.0462388	0.0818662	0.155157	161.937	156.995	169.789	181.573	0.01	0.01	0.01	0.01	12.0369	10.5337	-1.92404	-3.56695	-13.961	-14.1007	2.62629e-12
ENSG00000145990	GFOD1	2.13676	2.30095	1.51441	1.64795	7.1739	7.11821	7.33906	6.73212	0.493072	0.66599	0.0849699	0.216857	1.68733	2.15367	-1.93686	-3.38921	-3.62419	-5.54288	4.79219e-06
ENSG00000141314	RHBDL3	0.47582	0.336301	0.525374	0.669843	14.735	15.277	15.9092	17.2751	0.148371	0.0627117	0.105014	0.171527	5.2077	4.79516	-1.94388	-2.11171	-7.15158	-6.90687	2.89028e-12
ENSG00000267174	CTC-510F12.4	1.35136	0.624258	1.10525	2.28516	5.59564	6.25852	7.47076	5.05449	0.501647	0.01	0.497074	0.676593	2.58502	1.88531	-1.94908	-1.53044	-4.5341	-3.41574	2.16088e-05
ENSG00000171798	KNDC1	0.643557	0.735794	0.79348	0.808034	43.5568	41.1564	49.5833	52.2823	0.157674	0.197911	0.0142033	0.0869977	5.94052	5.99109	-1.95573	-3.98414	-7.89625	-9.97523	6.63975e-12
ENSG00000229481	CTD-2554C21.3	0.315622	0.533086	0.471916	0.487853	5.07483	4.22859	4.76021	3.93508	0.0878732	0.129994	0.0870722	0.177777	3.45442	3.17947	-1.96182	-1.85751	-5.41624	-5.03699	1.44929e-09
ENSG00000164199	GPR98	0.516477	0.400339	0.463139	0.524575	6.87183	7.20366	5.62401	5.52796	0.0633668	0.168252	0.149728	0.123267	3.94041	3.49706	-1.98488	-1.85522	-5.92529	-5.35228	4.31626e-11
ENSG00000156097	GPR61	0.34576	0.190259	0.31814	0.174115	1.22252	1.08997	1.54323	1.44539	0.067951	0.0670148	0.0673316	0.0916484	2.10909	2.60201	-1.98969	-1.63056	-4.09878	-4.23257	7.21507e-08
ENSG00000131094	C1QL1	25.2566	20.6379	24.5546	23.2685	222.753	224.073	288.475	320.041	2.74195	8.81037	4.99569	3.31047	3.28332	3.66952	-1.99014	-2.52545	-5.27346	-6.19497	4.84732e-09
ENSG00000271755	RP1-153G14.4	0.417679	0.506484	0.704576	0.4304	2.09214	2.11401	2.07816	2.38677	0.193812	0.0382283	0.076818	0.235262	2.18628	1.97597	-1.99377	-1.86267	-4.18006	-3.83865	1.22808e-06
ENSG00000260903	XKR7	0.0524494	0.0272576	0.0482597	0.0873066	25.9618	23.6731	24.5631	24.8164	0.01	0.01	0.01	0.01	9.28243	8.50877	-1.99471	-2.76093	-11.2771	-11.2697	1.94482e-12
ENSG00000254815	RP11-496I9.1	4.16858	5.39384	6.49702	5.66446	28.7893	31.3059	35.9789	42.4796	0.805305	1.58842	2.20613	1.34171	2.6518	2.68961	-1.99812	-1.7773	-4.64992	-4.46691	6.39039e-09
ENSG00000186231	KLHL32	0.299546	0.339648	0.275618	0.155414	3.83017	4.2159	5.35187	4.85505	0.01	0.149543	0.0300499	0.01	3.65396	4.56561	-2.00231	-3.42793	-5.65627	-7.99353	3.31193e-08
ENSG00000175785	PRIMA1	0.0528537	0.0274677	0.0243159	0.100548	0.635383	0.597964	0.493076	0.461275	0.01	0.01	0.01	0.01	3.94065	2.93416	-2.00578	-2.64229	-5.94644	-5.57645	6.75514e-06
ENSG00000204991	SPIRE2	3.92068	3.47187	3.09722	3.82746	13.1165	12.3487	14.0209	15.0022	0.861763	0.977374	0.469649	0.770022	1.78438	2.06738	-2.00704	-2.48179	-3.79142	-4.54917	4.13244e-10
ENSG00000197872	FAM49A	1.66136	1.35396	1.54602	1.6521	34.5654	32.3757	36.3521	31.0935	0.189223	0.559847	0.208331	0.191409	4.47251	4.39843	-2.00914	-3.00009	-6.48165	-7.39852	1.40314e-11
ENSG00000220008	LINGO3	0.0882104	0.504265	0.486985	0.419525	4.66587	5.30502	5.04724	4.89402	0.0491178	0.0968822	0.0486701	0.01	4.0729	3.45503	-2.02079	-3.94963	-6.09368	-7.40466	4.25951e-08
ENSG00000134258	VTCN1	0.01	0.0712457	0.0946058	0.01	1.31845	1.7959	1.61999	1.49557	0.01	0.01	0.01	0.01	5.26049	4.89646	-2.02229	-2.38689	-7.28278	-7.28335	2.63283e-06
ENSG00000101049	SGK2	0.356202	0.617052	0.436998	0.508225	1.5701	2.12101	3.1015	3.40478	0.01	0.228211	0.22929	0.0334391	1.92317	2.78311	-2.03057	-1.84708	-3.95374	-4.63018	1.52527e-05
ENSG00000272983	RP11-508N22.12	0.524242	0.590296	0.576158	0.4571	2.73095	3.38174	3.7133	3.30435	0.0648692	0.20792	0.0642778	0.131238	2.45536	2.76379	-2.03059	-2.40185	-4.48595	-5.16563	1.14338e-08
ENSG00000254427	RP11-430H10.1	0.223594	0.154934	0.548622	0.56715	2.59835	3.55038	2.13228	2.7877	0.01	0.0818584	0.164491	0.01	4.02182	2.14061	-2.04292	-2.67682	-6.06473	-4.81743	4.09801e-06
ENSG00000172995	ARPP21	0.122299	0.0635578	0.140662	0.106636	1.3477	0.922424	1.12826	1.02923	0.0226997	0.022387	0.0337392	0.011481	3.61051	3.12503	-2.04342	-2.45121	-5.65393	-5.57624	2.83779e-09
ENSG00000127415	IDUA	3.93819	4.46542	3.95303	3.16219	13.6188	15.1055	15.2684	12.9765	0.740455	1.29199	0.903022	0.864245	1.77319	1.98901	-2.04779	-2.00939	-3.82099	-3.9984	2.62612e-09
ENSG00000130643	CALY	0.546124	0.567633	0.669999	0.692625	59.9626	56.4385	67.3272	67.9377	0.0675768	0.199937	0.200882	0.0683578	6.70753	6.63326	-2.05775	-2.33942	-8.76527	-8.97268	8.58815e-14
ENSG00000240694	PNMA2	4.44303	2.72099	2.59536	3.10387	144.19	126.374	134.22	126.579	0.718587	0.992161	0.569629	0.830733	5.23906	5.51603	-2.06614	-2.02497	-7.3052	-7.541	1.54578e-13
ENSG00000158528	PPP1R9A	2.6472	2.22417	2.63094	2.26356	15.8008	15.8946	16.2345	17.0312	0.451967	0.709131	0.692127	0.727348	2.70187	2.7648	-2.06884	-1.7858	-4.77071	-4.55061	5.16222e-12
ENSG00000231381	RNF2P1	0.40734	0.105846	0.468502	0.193729	3.06053	2.78934	3.04008	2.92019	0.01	0.111846	0.01	0.01	3.51085	3.16997	-2.07442	-5.04926	-5.58527	-8.21923	5.67188e-07
ENSG00000245526	LINC00461	0.0499773	0.0346305	0.0459851	0.126768	21.9294	26.7435	22.2967	22.9094	0.01	0.01	0.01	0.01	9.16811	8.03166	-2.08079	-3.11064	-11.2489	-11.1423	3.38557e-11
ENSG00000270441	RP11-694I15.7	1.14345	1.01021	1.63077	1.30517	6.73556	6.94486	6.11593	8.69627	0.318351	0.188379	0.378539	0.128812	2.66725	2.33489	-2.0875	-2.53277	-4.75475	-4.86766	1.33701e-08
ENSG00000188385	JAKMIP3	0.14871	0.168619	0.211466	0.18003	6.01326	5.74767	6.64235	6.33756	0.0301111	0.0445444	0.0298366	0.01	5.21188	5.05114	-2.08766	-3.29683	-7.29954	-8.34797	1.54134e-11
ENSG00000248485	PCP4L1	0.01	0.0750732	0.01	0.20611	17.7133	12.2144	14.6444	18.8209	0.01	0.01	0.01	0.01	8.45856	7.27476	-2.0887	-3.43369	-10.5473	-10.7085	2.12941e-08
ENSG00000154655	L3MBTL4	0.0904603	0.0134319	0.0356718	0.0368765	3.09153	2.35466	2.84518	3.04514	0.0143916	0.01	0.01	0.0145579	5.71209	6.34326	-2.09063	-1.56275	-7.80272	-7.90601	2.36439e-10
ENSG00000267034	RP11-384O8.1	0.01	0.0757112	0.268094	0.01	13.3103	13.6194	13.7722	11.9879	0.01	0.01	0.01	0.01	8.2955	6.53342	-2.09948	-3.7975	-10.395	-10.3309	5.63806e-08
ENSG00000185149	NPY2R	0.0566997	0.0294664	0.208682	0.0808986	2.72647	2.97105	2.99741	3.03973	0.01	0.01	0.01	0.01	6.04707	4.38183	-2.10712	-3.85589	-8.15419	-8.23772	1.3249e-07
ENSG00000152969	JAKMIP1	0.0280025	0.0582108	0.0515314	0.106543	0.875248	0.466876	0.62697	0.733167	0.01	0.01	0.01	0.01	3.96046	3.10507	-2.10791	-2.98253	-6.06837	-6.08761	5.40277e-06
ENSG00000015592	STMN4	0.0312245	0.162271	0.172381	0.237604	241.736	219.951	260.34	251.019	0.0347731	0.01	0.0344562	0.01	11.2204	10.2845	-2.11159	-3.20512	-13.332	-13.4897	1.52813e-14
ENSG00000117245	KIF17	1.9098	2.05677	1.22796	1.22565	23.3461	20.8805	25.3584	24.3559	0.486871	0.429619	0.304694	0.362893	3.47895	4.34068	-2.1137	-1.87788	-5.59265	-6.21856	1.57142e-11
ENSG00000187726	DNAJB13	0.236785	0.338402	0.326805	0.197074	1.38768	1.0222	1.17812	1.03326	0.0988858	0.0325078	0.01	0.0333429	2.06686	2.07764	-2.13013	-3.59537	-4.197	-5.67301	2.18592e-06
ENSG00000269707	RP11-13J10.1	0.696524	0.482637	1.28177	0.883371	7.81507	9.4009	5.48713	7.52617	0.258561	0.01	0.01	0.01	3.86792	2.58745	-2.13444	-6.75832	-6.00235	-9.34577	5.02298e-07
ENSG00000165113	GKAP1	5.56704	4.45829	5.03837	4.80341	27.7572	24.6353	28.9475	28.0287	1.35513	0.902113	0.537113	1.3708	2.38571	2.53337	-2.15101	-2.36693	-4.53672	-4.9003	3.65678e-10
ENSG00000178662	CSRNP3	7.28527	5.5728	5.25721	6.11994	53.6011	48.001	51.2459	49.0383	1.17597	1.69919	2.1137	1.73362	2.98218	3.13988	-2.16096	-1.56421	-5.14315	-4.7041	4.24667e-12
ENSG00000268182	SMIM17	1.33824	1.4903	0.879529	0.636462	5.05614	8.9931	9.03642	9.89169	0.106452	0.524928	0.105482	0.215365	2.31236	3.6422	-2.16348	-2.2403	-4.47584	-5.8825	3.28774e-07
ENSG00000224934	RP11-441O15.3	0.960605	0.748829	1.76774	1.37058	4.41297	4.73937	4.56612	4.83338	0.305651	0.07536	0.302865	0.425127	2.42062	1.58259	-2.16561	-2.108	-4.58624	-3.69059	8.83837e-07
ENSG00000137731	FXYD2	0.0367662	0.191071	0.169146	0.104915	0.530383	0.875698	0.800319	0.550067	0.01	0.0403806	0.0608572	0.0207089	2.62561	2.3008	-2.17706	-1.74846	-4.80267	-4.04926	2.66125e-05
ENSG00000134207	SYT6	0.0201515	0.125671	0.0556254	0.0766719	0.363379	0.287982	0.325858	0.301491	0.01	0.0221326	0.01	0.01	2.15924	2.24548	-2.18211	-2.72571	-4.34135	-4.9712	4.29296e-05
ENSG00000152402	GUCY1A2	1.12528	1.14347	1.11059	1.0285	3.72577	3.33902	3.55792	3.87971	0.189026	0.310703	0.0208114	0.00708187	1.63875	1.79785	-2.18268	-6.26094	-3.82143	-8.05878	4.33176e-05
ENSG00000116990	MYCL	0.954414	0.675407	0.560537	0.985094	9.42294	8.70598	8.94168	8.88653	0.135687	0.22303	0.0448168	0.11438	3.47551	3.52789	-2.18379	-3.27932	-5.6593	-6.80721	2.74895e-10
ENSG00000152583	SPARCL1	1.21282	1.01462	0.843761	1.04108	10.8817	11.273	10.3394	10.9905	0.131772	0.35738	0.097928	0.01	3.31415	3.50036	-2.18703	-4.1263	-5.50118	-7.62666	1.17366e-08
ENSG00000269086	CTC-523E23.5	0.0753173	0.0469702	0.180182	0.0716413	0.289738	0.340843	0.393478	0.338052	0.0167754	0.01	0.01	0.01	2.3664	1.5385	-2.19129	-3.65434	-4.5577	-5.19285	1.7845e-05
ENSG00000203900	RP11-261N11.8	0.0603245	0.0313502	0.0277529	0.0860704	1.77673	2.22706	2.32612	2.8204	0.01	0.01	0.01	0.01	5.4487	5.49873	-2.19652	-2.50872	-7.64522	-8.00745	3.13731e-08
ENSG00000228487	RP13-225O21.2	1.55446	2.42352	3.09896	1.47859	18.3755	18.8206	18.0465	20.0265	0.01	0.853637	0.01	0.58371	3.22505	3.05612	-2.20354	-2.94674	-5.42858	-6.00287	2.99335e-07
ENSG00000273287	CTA-268H5.14	0.01	0.0821708	0.145484	0.150397	1.52062	1.41224	0.983372	2.26702	0.01	0.01	0.01	0.0890595	4.99186	3.45752	-2.20431	-1.57865	-7.19617	-5.03617	8.13669e-06
ENSG00000188523	C9orf171	0.335339	0.199169	0.0440789	0.136702	3.85853	4.33587	4.34997	6.68945	0.01	0.10523	0.0528638	0.01	3.93835	5.93228	-2.21369	-1.52394	-6.15205	-7.45622	3.49293e-08
ENSG00000182175	RGMA	18.1284	12.3373	13.7678	14.7973	78.1568	71.878	68.5878	74.4203	1.52216	5.03689	5.02101	4.72056	2.30004	2.32377	-2.21562	-1.55203	-4.51567	-3.8758	2.14801e-07
ENSG00000260931	RP11-65L3.1	0.149932	0.155837	0.0919702	0.0475381	1.98266	1.90458	2.11363	2.67934	0.0556573	0.01	0.01	0.01	3.66823	5.1025	-2.21941	-2.80228	-5.88764	-7.90478	3.77122e-08
ENSG00000258334	RP11-161H23.9	3.38236	2.10421	2.88501	2.11354	45.8848	45.5435	58.8091	70.4581	0.852334	0.32539	0.926297	0.69531	4.05866	4.6927	-2.2199	-1.62408	-6.27857	-6.31679	9.74973e-11
ENSG00000228417	RP11-549L6.3	7.65929	9.32569	11.2759	13.1138	60.2443	49.2559	53.6245	60.0246	1.21854	2.4035	1.6904	1.72567	2.6886	2.22024	-2.22938	-2.83586	-4.91799	-5.0561	1.29034e-09
ENSG00000235944	ZNF815P	0.8352	0.771639	0.569247	0.676742	2.56588	3.02076	2.84731	3.04677	0.0688979	0.271795	0.170675	0.209082	1.79776	2.24198	-2.23768	-1.71414	-4.03544	-3.95612	8.11433e-08
ENSG00000269891	ARHGAP19-SLIT1	11.9677	7.70168	8.03869	9.41762	49.7577	43.3804	43.3341	41.3082	2.64345	1.51664	2.44008	2.68417	2.24342	2.27763	-2.24126	-1.76834	-4.48469	-4.04597	1.6316e-10
ENSG00000075275	CELSR1	4.58214	2.94431	3.93553	3.70968	19.1396	19.9257	19.4845	20.3102	0.741753	0.837297	0.867821	1.08481	2.37585	2.37995	-2.25291	-1.96914	-4.62876	-4.34909	4.8053e-12
ENSG00000136541	ERMN	0.0468047	0.0486481	0.21533	0.0445203	0.393865	0.390179	0.378425	0.496015	0.01	0.01	0.0258245	0.01	3.03808	1.75068	-2.25479	-2.85866	-5.29286	-4.60934	9.81981e-05
ENSG00000100027	YPEL1	25.5769	20.7548	23.1724	25.5118	78.259	68.976	80.2692	80.6192	4.90932	4.79375	4.50334	4.37603	1.66805	1.72454	-2.25549	-2.45492	-3.92354	-4.17946	2.63799e-13
ENSG00000183150	GPR19	2.11745	1.42648	1.84007	1.60382	19.327	16.7645	22.8267	19.262	0.174674	0.55987	0.173082	0.176693	3.34824	3.61132	-2.27043	-3.29954	-5.61866	-6.91086	3.83924e-10
ENSG00000203401	AC009061.1	0.528809	0.183212	0.202736	0.377249	1.11249	1.41696	1.5348	1.59331	0.0981514	0.0483996	0.01	0.01	1.82883	2.43121	-2.28052	-4.85795	-4.10935	-7.28915	5.63359e-06
ENSG00000225968	ELFN1	8.66697	8.063	9.52527	9.97416	52.7061	52.4995	58.3618	64.4674	2.44278	0.998907	0.413259	0.180806	2.65271	2.65515	-2.28124	-5.03667	-4.93395	-7.69182	8.12873e-07
ENSG00000146221	TCTE1	0.331785	0.206911	0.457923	0.220914	17.43	16.6742	17.9937	19.6488	0.0738985	0.0364402	0.14645	0.0373763	5.98434	5.79315	-2.28753	-1.88472	-8.27187	-7.67788	8.94729e-12
ENSG00000053438	NNAT	195.374	179.688	230.157	212.149	1832.71	1728.94	1910.75	2127.07	32.3977	44.0859	6.40293	3.31303	3.24734	3.19046	-2.29391	-5.50854	-5.54125	-8.699	5.99534e-06
ENSG00000136997	MYC	623.851	620.794	395.897	465.974	1767.66	1859.08	1699.49	1868.03	122.651	129.108	109.368	140.897	1.54294	2.04937	-2.30562	-1.78402	-3.84856	-3.83339	1.38164e-10
ENSG00000164638	SLC29A4	22.7088	20.6045	20.7319	20.9102	66.0039	62.3086	67.8322	68.5859	4.17881	4.54891	5.50793	4.06759	1.56678	1.71192	-2.31113	-2.12062	-3.87791	-3.83254	2.4245e-12
ENSG00000213578	CPLX3	0.0494487	0.0513962	0.318491	0.0470353	1.12945	1.41333	1.16865	1.78788	0.01	0.01	0.0545666	0.01	4.6562	3.01586	-2.33407	-2.50111	-6.99026	-5.51698	7.19386e-06
ENSG00000185924	RTN4RL1	7.17845	6.31103	5.66519	6.99002	22.8872	22.4703	24.4933	22.7815	0.47397	2.18139	0.751439	0.191779	1.74951	1.90134	-2.34486	-3.746	-4.09436	-5.64734	6.71437e-06
ENSG00000158321	AUTS2	34.0804	29.1118	29.8319	31.1305	97.535	87.5806	97.5919	95.148	7.06959	5.30233	6.07911	9.42013	1.55061	1.66066	-2.35268	-1.97572	-3.90329	-3.63639	7.88481e-11
ENSG00000256694	RP11-598F7.5	0.186836	0.388389	0.429779	0.710869	3.03218	2.7813	3.83461	2.7953	0.01	0.102602	0.01	0.01	3.3372	2.53914	-2.3529	-5.83371	-5.6901	-8.37285	7.08178e-07
ENSG00000270681	RP11-372K14.2	2.31027	2.40126	2.38081	1.23061	9.44284	12.546	11.035	10.0237	0.514568	0.405982	0.509877	0.624617	2.2225	2.54378	-2.35563	-1.67052	-4.57813	-4.21429	2.11218e-08
ENSG00000164742	ADCY1	1.25431	0.647904	0.783398	0.925548	9.63211	8.90824	8.64258	7.85708	0.228578	0.141936	0.134219	0.239783	3.28492	3.27126	-2.36008	-2.19199	-5.645	-5.46325	4.01923e-11
ENSG00000169302	STK32A	0.158135	0.191756	0.133377	0.21309	14.3686	13.3709	15.2442	16.2819	0.01	0.0578935	0.0290836	0.0296903	6.30889	6.50768	-2.36556	-2.55947	-8.67445	-9.06716	1.11331e-12
ENSG00000235706	DICER1-AS1	2.65785	3.33806	4.0759	4.39789	13.5794	12.1005	18.2521	16.5686	0.524152	0.638562	0.794337	0.717343	2.09859	2.03887	-2.36648	-2.48685	-4.46507	-4.52572	1.76828e-09
ENSG00000103056	SMPD3	0.746667	0.805923	0.700234	1.20192	61.2445	52.1725	60.8516	61.4408	0.0959453	0.205017	0.253522	0.177933	6.19082	6.00656	-2.36702	-2.14035	-8.55784	-8.14691	1.90916e-13
ENSG00000146285	SCML4	0.0433614	0.0600923	0.146292	0.192477	2.29359	1.66967	2.58894	2.27059	0.01	0.01	0.01	0.01	5.25963	3.84244	-2.37091	-4.08223	-7.63054	-7.92467	1.74437e-07
ENSG00000221953	C1orf229	0.546608	0.757514	0.880152	0.563257	5.58541	6.56381	6.34584	6.13344	0.101455	0.150086	0.351856	0.102628	3.21971	3.11198	-2.37421	-1.66718	-5.59393	-4.77916	9.54239e-09
ENSG00000273313	RBAKDN	2.00104	1.45589	2.76179	1.71303	8.41945	5.48099	7.71603	4.98966	0.445692	0.219776	0.441629	0.676263	2.00757	1.50557	-2.37705	-2.00105	-4.38462	-3.50662	3.79179e-06
ENSG00000263301	RP11-104H15.8	6.23354	4.53533	4.01492	5.63283	43.838	43.4276	35.2795	41.1904	1.0413	1.02695	1.03181	0.01	3.01855	2.98663	-2.38038	-3.21111	-5.39893	-6.19774	8.74773e-09
ENSG00000204252	HLA-DOA	0.0512729	0.0532922	0.0471771	0.01	0.58556	0.732731	0.350774	0.671217	0.01	0.01	0.01	0.01	3.6562	4.1598	-2.38633	-1.51544	-6.04253	-5.67524	1.90242e-05
ENSG00000180190	TDRP	16.8472	16.4126	16.2896	14.8298	57.3603	59.8839	65.4246	63.9392	3.37077	2.94799	5.35668	4.66425	1.81767	2.05555	-2.39606	-1.6348	-4.21373	-3.69034	1.95839e-10
ENSG00000204420	C6orf25	0.210119	0.40039	0.676671	0.366417	1.01038	1.29286	1.39393	1.79013	0.0389999	0.0769252	0.01	0.0394506	1.91558	1.61001	-2.39682	-4.39873	-4.3124	-6.00873	8.56005e-06
ENSG00000204277	RP11-219G17.4	0.210334	0.255054	0.677363	0.633549	1.68569	2.63012	1.91861	2.27273	0.0780796	0.01	0.232103	0.039491	3.21312	1.67684	-2.40156	-2.27105	-5.61468	-3.94789	2.4439e-05
ENSG00000144868	TMEM108	0.0732487	0.0507557	0.123562	0.0812858	0.909914	0.726933	0.911122	0.715373	0.01	0.0134083	0.0134716	0.0275054	3.72246	2.98914	-2.4053	-2.32167	-6.12776	-5.31081	3.49522e-08
ENSG00000234869	RP3-439F8.1	0.0697547	0.036251	0.0641827	0.0331751	1.92869	1.95217	2.86328	3.95705	0.01	0.01	0.01	0.01	5.19416	6.1304	-2.40607	-2.2833	-7.60023	-8.4137	1.22955e-07
ENSG00000184515	BEX5	0.0967576	0.01	0.0890285	0.01	5.46693	4.03301	4.93453	3.98094	0.01	0.01	0.01	0.01	6.47551	6.49232	-2.41627	-2.30784	-8.89177	-8.80017	2.07418e-07
ENSG00000230747	AC021188.4	2.64083	0.722326	1.27888	1.32207	8.35443	11.4212	8.64437	4.85211	0.61915	0.01	0.306753	0.469729	2.55584	2.37547	-2.41834	-1.74402	-4.97418	-4.11949	8.41224e-06
ENSG00000230223	ATXN8OS	0.0526373	0.0547104	0.01	0.0500682	16.9586	9.52826	11.5889	12.1409	0.01	0.01	0.01	0.01	7.94684	8.62589	-2.42422	-1.5866	-10.3711	-10.2125	3.44257e-09
ENSG00000227719	AC006042.6	1.17771	1.22409	0.903028	1.30693	11.0903	12.3891	12.696	13.9492	0.01	0.431163	0.01	0.01	3.28921	3.59178	-2.44474	-6.78788	-5.73394	-10.3797	3.7985e-08
ENSG00000129682	FGF13	0.0819113	0.0283791	0.200982	0.181798	4.26704	3.77187	3.43021	2.31482	0.01	0.01	0.0301297	0.01	6.18762	3.90773	-2.46324	-3.25377	-8.65086	-7.1615	1.45885e-08
ENSG00000184697	CLDN6	1.06461	1.10654	1.08841	1.40646	20.6906	15.989	18.9073	21.5322	0.263468	0.129919	0.130533	0.133256	4.07844	4.01873	-2.46444	-3.24151	-6.54288	-7.26023	7.9484e-12
ENSG00000236824	BCYRN1	0.229276	0.190645	0.5485	0.399824	1.41488	1.95683	2.11041	2.00098	0.0340445	0.0419693	0.0421677	0.0774854	3.00529	2.11618	-2.46579	-2.98652	-5.47107	-5.1027	9.14673e-08
ENSG00000176533	GNG7	6.38182	4.8987	6.01728	6.39209	23.6393	22.4781	24.4878	24.9103	0.678065	1.36221	1.41842	1.14317	2.03148	1.99302	-2.467	-2.27632	-4.49847	-4.26934	2.42482e-10
ENSG00000158555	GDPD5	2.18903	2.34026	2.55129	2.63744	12.9322	13.0098	15.4426	16.4533	0.452738	0.366359	0.655662	0.410999	2.51793	2.61992	-2.46718	-2.28228	-4.98511	-4.9022	2.74884e-11
ENSG00000189316	RP11-797H7.5	0.01	0.100663	0.267337	0.184244	2.44497	2.42208	2.28889	2.53571	0.01	0.01	0.106872	0.01	5.4588	3.41735	-2.4681	-1.95005	-7.9269	-5.3674	1.349e-06
ENSG00000105289	TJP3	0.338095	0.251008	0.666617	0.597245	2.17737	2.50211	2.7636	3.16145	0.0268943	0.0795712	0.133246	0.0272051	2.98976	2.22899	-2.46813	-2.97764	-5.45789	-5.20663	2.24221e-07
ENSG00000177380	PPFIA3	7.60518	6.91041	5.20791	5.53545	47.5339	42.3611	46.1492	50.3913	1.70456	0.910581	1.4427	1.07766	2.63064	3.16769	-2.47264	-2.09174	-5.10328	-5.25943	2.50737e-11
ENSG00000213199	ASIC3	2.50771	5.52416	4.95916	3.73817	17.548	16.7597	14.7118	17.6392	0.583551	0.863267	1.07386	1.56007	2.09472	1.89517	-2.47285	-1.72336	-4.56757	-3.61853	2.41396e-07
ENSG00000130876	SLC7A10	1.28939	0.755992	0.577984	0.723294	3.29881	3.66165	2.63193	2.34952	0.220912	0.145245	0.01	0.0744882	1.76681	1.93664	-2.48183	-3.94503	-4.24865	-5.88167	2.50298e-06
ENSG00000257151	PWAR6	13.742	17.2232	18.1569	18.1557	62.626	61.9868	73.0829	68.6712	2.92682	2.56849	2.18739	2.43375	2.00873	1.96485	-2.49438	-2.97415	-4.50311	-4.939	1.20047e-11
ENSG00000171124	FUT3	0.01	0.103156	0.121759	0.01	2.86346	2.28508	3.86814	3.2172	0.01	0.01	0.0365065	0.01	5.50778	5.74886	-2.50024	-1.5024	-8.00802	-7.25126	6.41743e-08
ENSG00000260572	RP11-16N11.2	0.179918	0.249339	0.386275	0.513411	1.65822	2.35692	2.68555	2.6918	0.01	0.0658686	0.13236	0.135121	3.22553	2.5794	-2.50027	-1.74998	-5.7258	-4.32939	1.52136e-06
ENSG00000105409	ATP1A3	0.426104	0.463976	0.224038	0.347406	391.646	385.83	398.55	383.666	0.0903868	0.0668562	0.0223907	0.114289	9.77065	10.4187	-2.50094	-2.06381	-12.2716	-12.4825	3.94738e-15
ENSG00000231121	RP1-34H18.1	0.103787	0.01	0.28649	0.0987218	4.11736	2.71921	4.13115	1.81159	0.01	0.01	0.01	0.01	5.90886	3.9474	-2.50827	-4.26758	-8.41713	-8.21498	1.03419e-05
ENSG00000261159	RP11-723O4.9	2.28281	2.50454	3.85084	3.01582	12.1969	9.21305	12.7779	12.8076	0.282473	0.557162	0.419847	0.857212	2.16098	1.89765	-2.51139	-2.42678	-4.67237	-4.32443	6.96328e-08
ENSG00000198125	MB	0.238402	0.247791	0.344706	0.259161	1.43298	1.46012	2.4147	1.91078	0.01	0.074811	0.01	0.01	2.57302	2.84056	-2.51921	-4.91616	-5.09222	-7.75672	3.8551e-07
ENSG00000101489	CELF4	0.425144	0.278226	0.42016	0.509237	58.8131	57.2312	56.1535	60.0338	0.105214	0.017294	0.0173758	0.0709531	7.36618	6.96594	-2.52141	-3.39534	-9.88759	-10.3613	7.85578e-14
ENSG00000109339	MAPK10	7.82716	6.5127	8.40707	8.36208	31.7554	29.1995	34.7733	33.378	0.793491	1.70322	2.39346	1.34564	2.08771	2.02293	-2.52193	-2.16505	-4.60964	-4.18798	2.61909e-08
ENSG00000162009	SSTR5	0.0756831	0.0393319	0.139275	0.107984	1.63769	1.66743	2.11816	2.73642	0.01	0.01	0.01	0.01	4.84481	4.29525	-2.52375	-3.62795	-7.36856	-7.9232	2.49148e-07
ENSG00000227407	AC008746.3	5.63846	4.24383	5.72475	3.6988	138.838	142.864	128.179	135.749	0.433054	1.28126	1.07277	1.09515	4.83318	4.80773	-2.52721	-2.11997	-7.3604	-6.92769	2.87279e-12
ENSG00000116983	HPCAL4	0.105903	0.0880595	0.077955	0.241763	42.726	35.0363	38.7024	36.9176	0.0235879	0.01	0.01	0.01	8.64715	7.88583	-2.52977	-3.99873	-11.1769	-11.8846	2.31437e-13
ENSG00000198934	MAGEE1	2.72496	1.90746	2.20027	2.27458	26.5743	24.3056	27.2198	27.1098	0.37159	0.427549	0.552305	0.720446	3.45726	3.60183	-2.53525	-1.81389	-5.9925	-5.41572	1.78363e-12
ENSG00000172828	CES3	0.375149	0.693198	0.575303	0.674029	3.48262	2.85434	3.99235	4.13156	0.0232103	0.160233	0.0919948	0.117393	2.56841	2.70102	-2.54197	-2.57691	-5.11038	-5.27793	2.95207e-08
ENSG00000145920	CPLX2	0.101419	0.0150591	0.0399932	0.096469	67.5096	64.5483	65.0046	71.0988	0.01	0.01	0.01	0.01	10.1469	9.96199	-2.54199	-2.77043	-12.6889	-12.7324	3.04518e-12
ENSG00000136367	ZFHX2	3.04052	1.97244	2.81693	3.21125	20.8849	20.9141	20.1751	21.8822	0.291903	0.564247	0.323951	0.118111	3.05974	2.80256	-2.54973	-3.7694	-5.60946	-6.57197	2.77979e-09
ENSG00000109472	CPE	76.1838	64.6557	67.7946	73.4246	276.886	258.973	280.18	290.37	7.58971	16.4215	19.5304	14.4931	1.9278	2.01442	-2.55227	-2.05334	-4.48007	-4.06775	9.86625e-09
ENSG00000105088	OLFM2	7.73457	5.34521	4.31546	5.6352	118.65	112.199	116.218	116.386	0.641439	1.5815	1.58898	0.695199	4.14154	4.54693	-2.55679	-2.12312	-6.69834	-6.67005	3.2945e-11
ENSG00000178695	KCTD12	12.7473	11.3958	8.99427	9.45507	34.8764	34.7466	33.1908	33.4533	2.46408	1.63217	0.346199	0.0186011	1.52796	1.85291	-2.55923	-5.66032	-4.08719	-7.51323	8.45981e-05
ENSG00000107954	NEURL1	0.559774	0.387881	0.286144	0.374689	21.0355	17.9498	21.3787	19.1796	0.0692659	0.0910821	0.0228782	0.0934219	5.36242	5.93957	-2.56315	-2.50643	-7.92558	-8.446	6.88656e-13
ENSG00000176884	GRIN1	0.015301	0.143133	0.11263	0.072771	8.57168	8.81945	8.16496	8.35565	0.01	0.0168052	0.01	0.01	6.77833	6.47747	-2.56329	-3.21258	-9.34162	-9.69005	6.76538e-11
ENSG00000250358	RP11-159K7.2	0.108267	0.01	0.498091	0.205965	3.12368	2.9655	2.82807	3.10462	0.01	0.01	0.01	0.01	5.68613	3.07493	-2.56397	-5.13762	-8.2501	-8.21254	1.37825e-05
ENSG00000103942	HOMER2	1.23624	1.16812	0.770861	0.98154	8.75726	9.21065	8.74346	9.06952	0.147915	0.258089	0.135292	0.0690572	2.9017	3.34552	-2.56609	-3.10023	-5.46778	-6.44575	2.82599e-10
ENSG00000162571	TTLL10	0.01	0.10845	0.0960054	0.148871	0.501732	1.02514	1.75211	1.30088	0.01	0.01	0.01	0.01	3.68823	3.6401	-2.5662	-3.61398	-6.25443	-7.25408	4.35311e-05
ENSG00000139438	FAM222A	9.25735	6.97951	7.85678	8.25354	63.3509	57.5912	65.5839	68.6994	1.93879	0.789113	1.25025	1.55651	2.89697	3.05922	-2.57341	-2.52101	-5.47038	-5.58023	1.35843e-11
ENSG00000240510	AL589765.1	0.0584394	0.060741	0.107542	0.01	24.3076	22.4098	25.7327	20.6195	0.01	0.01	0.01	0.01	8.61467	8.62331	-2.57508	-2.55511	-11.1897	-11.1784	4.08391e-10
ENSG00000271757	RP11-111M22.5	0.579455	0.451708	0.799752	0.275587	3.48297	4.658	5.76616	6.50202	0.161328	0.01	0.01	0.163192	2.98093	3.51206	-2.58944	-2.63435	-5.57037	-6.1464	5.92835e-07
ENSG00000116147	TNR	0.0793621	0.0412439	0.0292091	0.0754887	0.791866	0.548173	0.700888	0.524415	0.01	0.01	0.00875761	0.01	3.4739	3.54884	-2.59223	-2.48068	-6.06613	-6.02952	1.68585e-08
ENSG00000267576	CTC-510F12.6	16.1205	18.1714	16.5041	17.6014	61.6863	75.575	81.9021	86.1973	2.52854	3.11712	1.87912	2.55776	2.00099	2.30124	-2.60265	-2.94239	-4.60364	-5.24363	5.29535e-11
ENSG00000187730	GABRD	0.01	0.111766	0.0494706	0.01	1.42196	0.768353	0.869408	1.34066	0.01	0.01	0.01	0.01	4.16895	5.21577	-2.60604	-1.57218	-6.77499	-6.78795	2.71775e-05
ENSG00000129595	EPB41L4A	4.25608	3.86296	4.2691	4.1738	25.6256	23.3297	29.3334	27.0699	0.814443	0.513535	0.74087	1.1615	2.59208	2.73997	-2.61208	-2.14994	-5.20416	-4.88991	2.23874e-11
ENSG00000126500	FLRT1	2.03154	1.86791	2.08495	2.89858	24.798	22.984	26.6305	25.556	0.406077	0.228847	0.488599	0.322748	3.61512	3.38844	-2.61862	-2.61878	-6.23374	-6.00721	5.79646e-12
ENSG00000163947	ARHGEF3	1.09186	1.24835	1.11946	1.3353	6.54418	6.37147	7.87721	7.60383	0.208449	0.171314	0.395885	0.281144	2.46441	2.65685	-2.62347	-1.85829	-5.08788	-4.51514	3.54596e-10
ENSG00000237517	DGCR5	0.213536	0.110973	0.0982395	0.101557	6.54594	6.35752	6.05006	6.53744	0.0132114	0.0390881	0.01	0.01	5.31335	5.97732	-2.63339	-3.32046	-7.94675	-9.29778	5.76093e-11
ENSG00000161681	SHANK1	0.0679618	0.0565107	0.0750395	0.0129289	5.80074	5.73025	4.75092	4.20274	0.01	0.01	0.0149992	0.01	6.53355	6.66935	-2.63776	-1.81511	-9.1713	-8.48445	6.87003e-11
ENSG00000080298	RFX3	11.5462	11.8169	13.6936	13.2785	62.5454	57.4653	72.4128	67.3181	1.87843	1.87302	3.03362	2.81347	2.36086	2.37312	-2.63871	-2.20567	-4.99957	-4.57879	3.866e-11
ENSG00000224769	AC069213.1	0.0612222	0.0636335	0.168995	0.174702	0.809584	2.40602	1.4469	2.06091	0.01	0.01	0.01	0.01	4.68676	3.35136	-2.64219	-4.10307	-7.32895	-7.45443	1.78539e-05
ENSG00000176749	CDK5R1	15.2913	15.9429	12.5162	15.6986	111.638	98.3588	103.533	101.075	2.91323	2.0634	4.40873	3.50948	2.74917	2.85834	-2.64989	-1.8332	-5.39906	-4.69154	3.9792e-11
ENSG00000182389	CACNB4	0.733047	0.68337	0.841375	0.819471	3.24331	2.89796	3.40287	3.12813	0.0925768	0.132802	0.0500361	0.0425667	2.11629	1.97539	-2.65182	-4.16472	-4.76811	-6.1401	1.45102e-09
ENSG00000153563	CD8A	0.01	0.117542	0.182095	0.349597	1.76734	1.71712	1.61767	1.76243	0.01	0.01	0.01	0.01	4.77189	2.6684	-2.6729	-4.73252	-7.44479	-7.40092	1.89568e-05
ENSG00000135119	RNFT2	4.8317	4.37904	4.41497	4.91393	17.5057	17.9989	18.2173	18.2596	0.800608	0.642679	0.885555	1.1112	1.94662	1.9672	-2.67396	-2.22405	-4.62058	-4.19125	6.16906e-12
ENSG00000140557	ST8SIA2	8.06727	6.70075	6.22044	5.93331	56.7224	53.9712	52.5141	56.1338	1.20306	1.10994	0.288409	0.883278	2.90602	3.16019	-2.67464	-3.37474	-5.58067	-6.53493	1.68618e-09
ENSG00000124140	SLC12A5	2.43456	1.81965	1.93805	2.02952	8.63217	7.60665	8.98279	8.54327	0.274171	0.390569	0.301858	0.154078	1.93249	2.14317	-2.67803	-3.12135	-4.61051	-5.26453	2.68526e-10
ENSG00000242220	TCP10L	1.0168	0.650368	0.57574	1.04157	7.24008	9.78043	7.68593	7.31375	0.174209	0.0859046	0.258932	0.264334	3.3518	3.21326	-2.68018	-1.62798	-6.03199	-4.84124	2.84934e-09
ENSG00000255118	RP11-703H8.7	6.14999	4.40842	3.31718	5.24467	15.0414	14.9006	18.2013	14.542	1.18085	0.465833	0.702053	1.1945	1.50378	1.93521	-2.68076	-2.17454	-4.18454	-4.10975	6.79652e-08
ENSG00000164659	KIAA1324L	9.10027	7.00838	8.45497	8.80078	24.8053	22.1581	26.2653	25.078	1.21388	1.2946	0.517492	0.51401	1.5437	1.5731	-2.68295	-4.06426	-4.22665	-5.63736	1.99697e-08
ENSG00000259969	RP11-999E24.3	5.24227	4.46796	5.98116	4.5875	26.0904	26.0959	31.6907	28.1044	1.05085	0.46061	0.34709	0.354332	2.42609	2.50024	-2.68356	-3.91336	-5.10965	-6.4136	1.00384e-09
ENSG00000137968	SLC44A5	0.179187	0.118519	0.329747	0.185936	14.1779	14.86	13.049	13.3027	0.0362821	0.01	0.0719028	0.0917536	6.60791	5.67527	-2.68536	-1.65581	-9.29327	-7.33108	4.93597e-11
ENSG00000186297	GABRA5	1.16372	0.617646	0.296169	0.518135	5.26848	4.42302	4.09619	3.55006	0.13787	0.135971	0.01	0.01	2.44373	3.23111	-2.70157	-5.3475	-5.14531	-8.57861	1.38429e-06
ENSG00000198478	SH3BGRL2	15.6857	11.8425	12.1325	13.4892	104.816	91.8728	111.976	103.906	1.57684	2.57566	1.9775	2.19321	2.83693	3.07481	-2.72886	-2.619	-5.56579	-5.6938	6.2792e-13
ENSG00000160179	ABCG1	0.285517	0.576068	0.401791	0.527188	7.34928	7.16048	8.52354	6.8682	0.0561117	0.0737849	0.0185334	0.01	4.07389	4.05037	-2.72963	-5.02492	-6.80352	-9.07529	6.24185e-10
ENSG00000135406	PRPH	0.118249	0.122907	0.239368	0.224956	77.0191	79.3681	102.138	115.084	0.0263377	0.01	0.0521953	0.0266421	9.34094	8.86982	-2.73043	-2.55818	-12.0714	-11.428	9.21534e-14
ENSG00000160190	SLC37A1	1.6302	1.80422	1.66664	1.85214	32.481	31.0984	37.1193	37.902	0.201719	0.314988	0.666267	0.4081	4.21042	4.41415	-2.73265	-1.71159	-6.94307	-6.12574	1.30784e-11
ENSG00000174776	WDR49	0.105735	0.0274747	0.0486442	0.0251435	0.730879	0.661078	1.31521	0.758003	0.01	0.01	0.01	0.01	3.38535	4.81234	-2.73562	-1.88338	-6.12097	-6.69572	3.45178e-06
ENSG00000261763	RP11-442N1.2	0.0521436	0.081296	0.191913	0.198395	0.626847	0.714127	0.810752	1.1702	0.01	0.01	0.01	0.01	3.32902	2.34351	-2.73812	-4.28654	-6.06714	-6.63005	1.47784e-05
ENSG00000205269	TMEM170B	8.38598	7.70126	6.59294	8.35984	37.5955	37.2146	38.5055	37.1493	1.15549	1.24682	0.902493	1.14134	2.21732	2.33902	-2.74342	-2.87107	-4.96074	-5.21008	3.07076e-13
ENSG00000146090	RASGEF1C	0.34783	0.686906	0.192027	0.661707	6.6067	6.29632	7.83109	7.97941	0.0774723	0.0764049	0.01	0.01	3.64037	4.21095	-2.74941	-5.41571	-6.38979	-9.62667	1.31069e-08
ENSG00000114631	PODXL2	42.0635	34.0372	24.6334	25.5548	219.236	214.102	222.924	232.124	6.183	5.06429	1.45378	2.7562	2.50951	3.1806	-2.75833	-3.57546	-5.26785	-6.75606	3.63132e-08
ENSG00000183166	CALN1	0.051278	0.0852761	0.0471818	0.0292651	0.801372	0.928219	1.12259	0.767181	0.01	0.01	0.01	0.01	3.66289	4.62761	-2.7714	-1.93446	-6.43429	-6.56207	9.30161e-08
ENSG00000239922	RP11-71N10.1	0.399078	0.150835	0.200291	0.0690182	1.48287	2.67876	2.48202	2.2164	0.0404031	0.0398464	0.0400348	0.01	2.91987	4.12484	-2.77664	-2.42826	-5.69651	-6.5531	2.64442e-07
ENSG00000072182	ASIC4	0.0783644	0.285078	0.342497	0.298159	9.16155	8.04923	11.0147	12.1151	0.01	0.0430341	0.0216188	0.01	5.56544	5.17406	-2.77673	-4.3407	-8.34218	-9.51476	5.82595e-10
ENSG00000129596	CDO1	7.75276	6.54416	7.6955	7.64253	47.3344	44.8769	42.4897	44.4632	0.837224	1.23853	0.622194	0.158794	2.68924	2.50312	-2.78399	-4.29567	-5.47323	-6.79879	1.99508e-09
ENSG00000091622	PITPNM3	1.85173	1.19913	1.41836	1.30949	5.5943	5.2302	5.60756	5.59643	0.280716	0.15972	0.096285	0.0873722	1.82701	2.03818	-2.79221	-3.89267	-4.61923	-5.93085	3.41732e-09
ENSG00000175664	TEX26	0.01	0.1288	0.0570104	0.01	0.744853	0.811669	1.00191	1.31324	0.01	0.01	0.01	0.01	3.48724	5.11058	-2.79494	-1.74439	-6.28218	-6.85497	5.6823e-05
ENSG00000145362	ANK2	5.60803	4.13834	3.44003	3.83018	55.665	48.2366	53.6559	50.8375	0.654099	0.738128	0.317836	0.432622	3.41421	3.84527	-2.80747	-3.27615	-6.22168	-7.12142	9.92791e-11
ENSG00000120251	GRIA2	0.0805249	0.0597831	0.0740925	0.109421	10.9664	12.2612	11.6904	10.6133	0.01	0.01	0.01	0.01	7.3711	6.92526	-2.81053	-3.19781	-10.1816	-10.1231	6.93171e-12
ENSG00000089101	C20orf26	0.0983705	0.0438192	0.0517215	0.0802022	0.506813	0.50207	0.611803	0.788434	0.01	0.01	0.01	0.01	2.82687	3.4079	-2.82974	-2.72163	-5.65662	-6.12953	4.87686e-07
ENSG00000263812	LINC00908	0.271023	0.598607	0.374061	0.644488	1.58833	1.29105	1.76988	2.28085	0.01	0.111625	0.0373843	0.01	1.72728	1.99166	-2.83796	-4.42596	-4.56525	-6.41763	5.27964e-06
ENSG00000198797	BRINP2	0.234172	0.594964	0.622457	0.618728	2.78382	3.74932	2.33024	2.72494	0.0579523	0.0571539	0.172272	0.205177	2.9781	2.02604	-2.84864	-1.71736	-5.82674	-3.74341	7.81291e-07
ENSG00000159713	TPPP3	3.81084	4.0426	5.96454	5.71753	197.228	195.897	247.712	279.539	0.700032	0.388343	1.12718	0.531092	5.64552	5.49612	-2.85115	-2.81654	-8.49667	-8.31267	9.09382e-12
ENSG00000021300	PLEKHB1	2.16841	1.97208	1.88008	1.78492	8.87301	8.69063	9.36249	9.87818	0.0928788	0.480895	0.276096	0.11744	2.08472	2.39227	-2.85125	-3.21924	-4.93597	-5.61152	1.59685e-08
ENSG00000082556	OPRK1	0.1077	0.0373139	0.0825806	0.153665	1.53208	1.21847	1.42896	0.872799	0.01	0.01	0.0198078	0.020221	4.24546	3.28438	-2.85812	-2.56118	-7.10358	-5.84556	5.31852e-08
ENSG00000167414	GNG8	2.38086	1.48478	3.06695	3.62346	111.624	112.281	138.598	175.729	0.01	0.522984	0.01	0.01	5.85604	5.55403	-2.85854	-8.38595	-8.71458	-13.94	8.09114e-11
ENSG00000147488	ST18	0.0857349	0.0445558	0.0525909	0.0747546	18.1054	18.3869	18.4138	20.5677	0.00795657	0.01	0.0236521	0.01	8.12971	8.2579	-2.85915	-1.91998	-10.9889	-10.1779	9.44015e-14
ENSG00000110324	IL10RA	0.0471372	0.0979874	0.01	0.0896731	1.79443	1.2537	1.30946	1.41046	0.01	0.01	0.01	0.0177003	4.39256	4.77022	-2.85922	-1.8473	-7.25178	-6.61752	7.31835e-08
ENSG00000101265	RASSF2	3.55406	2.72876	2.57997	2.75204	12.9035	11.1237	11.3963	10.933	0.179004	0.686536	0.295621	0.342026	1.93518	2.06619	-2.85974	-3.06385	-4.79492	-5.13004	6.64668e-09
ENSG00000232044	LINC01105	0.0818082	0.0637726	0.01	0.155631	0.614663	0.998612	0.763194	0.586477	0.01	0.01	0.01	0.01	3.4701	3.02657	-2.86375	-3.0499	-6.33385	-6.07646	3.44835e-05
ENSG00000188674	C2orf80	0.0716748	0.0744977	0.131899	0.01	13.7863	11.9501	12.3033	10.6341	0.01	0.01	0.01	0.01	7.45999	7.3367	-2.8696	-2.82679	-10.3296	-10.1635	4.67195e-09
ENSG00000269425	AC007292.7	3.31785	5.74754	4.40963	5.96117	13.7384	17.122	16.0494	15.1675	0.821095	0.404891	1.22041	0.415292	1.76732	1.5898	-2.88643	-2.66454	-4.65374	-4.25434	4.98282e-07
ENSG00000256824	RP11-21A7A.2	1.2813	0.726416	0.643062	2.43752	15.1231	16.23	15.5031	11.3276	0.25944	0.01	0.01	0.01	3.96499	3.12261	-2.89752	-7.26706	-6.8625	-10.3897	7.89253e-08
ENSG00000227999	MTND5P1	0.29921	0.388743	0.550617	0.0711515	1.88841	1.24715	2.41917	2.33153	0.01	0.0821561	0.01	0.168533	2.18834	2.93369	-2.90016	-1.80019	-5.0885	-4.73388	3.9847e-05
ENSG00000273274	ZBTB8B	0.384678	0.283212	0.457185	0.404018	3.49722	3.26406	3.00054	2.56788	0.0535497	0.0352079	0.0265308	0.0451404	3.33961	2.69284	-2.91167	-3.58689	-6.25128	-6.27973	6.63488e-11
ENSG00000235098	ANKRD65	1.32262	1.65774	1.6107	1.70209	3.92823	5.5129	6.72587	7.85702	0.259931	0.128175	0.300488	0.17529	1.66347	2.13816	-2.94097	-2.79969	-4.60444	-4.93785	2.64628e-08
ENSG00000108947	EFNB3	44.8826	34.8052	41.4442	43.6029	235.356	206.922	231.692	226.619	4.08827	6.17063	10.5678	6.40107	2.47252	2.42999	-2.95748	-2.32537	-5.43001	-4.75536	1.29043e-09
ENSG00000142675	CNKSR1	0.534237	1.21632	0.655416	0.629153	2.9971	2.99934	2.34166	2.94974	0.113324	0.111763	0.112291	0.286585	1.77629	2.04236	-2.95926	-1.68727	-4.73555	-3.72963	8.86646e-07
ENSG00000229743	LINC01159	0.09208	0.0638044	0.169449	0.0875858	3.57912	3.47251	3.32154	3.40581	0.01	0.01	0.01	0.01	5.49941	4.71	-2.9624	-3.68389	-8.46181	-8.39389	8.08884e-09
ENSG00000253535	RP11-624C23.1	0.076699	0.0797198	0.141144	0.0729555	1.01424	1.18743	1.24025	1.05189	0.01	0.01	0.01	0.01	3.81512	3.42034	-2.96734	-3.42021	-6.78246	-6.84055	5.19778e-06
ENSG00000162992	NEUROD1	0.124219	0.0322778	0.285741	0.206773	9.81848	11.2799	9.61843	11.6542	0.01	0.01	0.01	0.01	7.07485	5.43269	-2.96806	-4.62209	-10.0429	-10.0548	9.11672e-09
ENSG00000249487	RP11-97O12.2	0.01	0.146779	0.01	0.402975	1.86742	1.00906	1.63946	1.93672	0.01	0.01	0.01	0.01	4.19749	3.1143	-2.97066	-4.36798	-7.16816	-7.48228	0.000210654
ENSG00000256069	A2MP1	0.0441715	0.114778	0.0812861	0.0840312	0.424808	0.26302	0.631854	0.440573	0.01	0.01	0.0243716	0.01	2.11348	2.69757	-2.9905	-2.26595	-5.10397	-4.96352	1.15134e-05
ENSG00000116852	KIF21B	15.9089	12.5226	13.4773	14.5204	145.356	112.597	119.964	107.122	2.49867	1.07869	1.8686	4.08222	3.18154	3.01986	-2.99053	-2.23415	-6.17207	-5.25401	1.58319e-08
ENSG00000198948	MFAP3L	0.917808	0.635971	0.552168	0.481276	3.19688	3.37715	3.76155	3.08079	0.104833	0.0904647	0.0519385	0.106044	2.081	2.72703	-2.99204	-2.70962	-5.07303	-5.43665	8.71364e-10
ENSG00000095637	SORBS1	1.59713	1.11657	1.25087	1.42875	7.96571	6.78163	6.45655	6.49528	0.201156	0.135737	0.283248	0.182062	2.44212	2.27306	-3.0099	-2.52576	-5.45202	-4.79882	5.33033e-11
ENSG00000136895	GARNL3	1.32121	1.12057	0.943359	0.864625	6.82332	6.94826	5.81112	6.444	0.0823964	0.220566	0.233272	0.202418	2.49569	2.76093	-3.01072	-2.05301	-5.50641	-4.81394	6.34874e-10
ENSG00000198673	FAM19A2	0.54455	0.346529	0.347668	0.549685	1.53639	1.72053	1.71412	1.85666	0.0495052	0.061029	0.147162	0.075116	1.86988	1.99249	-3.01106	-2.01331	-4.88094	-4.0058	2.80142e-08
ENSG00000196132	MYT1	0.0701711	0.0911685	0.22598	0.183552	99.7516	92.425	102.995	95.6454	0.01	0.01	0.01	0.0395246	10.2181	8.92197	-3.01203	-3.04776	-13.2301	-11.9697	1.2439e-13
ENSG00000181409	AATK	1.52008	1.288	0.912167	1.14728	12.2355	9.95647	11.4475	10.7119	0.184004	0.163322	0.0729308	0.0744524	2.98238	3.42759	-3.01522	-3.80461	-5.9976	-7.23221	4.93597e-11
ENSG00000173825	TIGD3	2.24928	0.956399	1.88146	1.99362	8.60357	8.03601	8.71139	11.6635	0.227719	0.168436	0.0564108	0.115175	2.37592	2.39449	-3.01649	-4.49722	-5.39241	-6.89171	5.84949e-09
ENSG00000198929	NOS1AP	1.30256	0.911008	1.43373	1.2274	8.1367	7.11821	10.115	9.2279	0.0948987	0.173812	0.107467	0.0822818	2.78483	2.86169	-3.04224	-3.80988	-5.82707	-6.67157	5.05151e-11
ENSG00000009950	MLXIPL	0.277693	0.199821	0.255511	0.26414	1.46372	1.78072	1.70051	2.13058	0.0475775	0.01	0.01	0.0962546	2.76435	2.88214	-3.05197	-2.29002	-5.81632	-5.17216	2.20435e-07
ENSG00000249896	RP11-586D19.1	0.0403822	0.125918	0.01	0.153645	0.728184	0.913732	0.602764	0.553819	0.01	0.01	0.01	0.01	3.30352	2.82123	-3.05572	-3.0325	-6.35924	-5.85373	0.000121429
ENSG00000115507	OTX1	0.851259	0.530871	0.469956	0.668012	6.06332	7.52721	6.962	6.23527	0.0948005	0.0701208	0.01	0.0479481	3.29764	3.53571	-3.06704	-4.29556	-6.36468	-7.83126	7.722e-10
ENSG00000163235	TGFA	0.10362	0.0646207	0.01	0.0788501	0.49827	0.567647	0.644452	0.981847	0.01	0.01	0.01	0.01	2.66349	4.19407	-3.07246	-2.15137	-5.73595	-6.34545	2.18355e-05
ENSG00000166405	RIC3	0.82817	0.666416	0.675981	0.584459	16.0258	13.2987	15.4521	12.99	0.0892541	0.0880244	0.0737004	0.075238	4.29429	4.49603	-3.07566	-3.08114	-7.36994	-7.57717	1.2439e-13
ENSG00000231473	LINC00441	0.359942	0.561177	0.496784	1.3695	2.92076	3.32208	3.58178	4.03888	0.01	0.0988317	0.0992989	0.01	2.76074	2.02975	-3.08129	-4.09381	-5.84203	-6.12357	2.58204e-06
ENSG00000156395	SORCS3	0.0665502	0.103757	0.0612341	0.0949531	1.40006	1.80305	1.38657	0.954187	0.01	0.01	0.01	0.01	4.23326	3.90562	-3.09007	-2.9652	-7.32333	-6.87083	1.11261e-07
ENSG00000184305	CCSER1	0.0986319	0.0717615	0.108904	0.112582	3.79426	2.65462	3.03034	3.17266	0.01	0.01	0.01	0.01	5.24211	4.80768	-3.0908	-3.46914	-8.33291	-8.27682	4.36727e-10
ENSG00000119698	PPP4R4	0.392886	0.5803	0.26637	0.393379	1.83952	1.05891	1.98052	1.39217	0.0230283	0.0908441	0.01	0.01	1.57448	2.35391	-3.0953	-5.04384	-4.66978	-7.39776	2.57326e-06
ENSG00000132821	VSTM2L	18.5722	17.1286	19.6399	20.9998	201.128	172.518	204.855	222.225	1.68959	2.47074	3.29065	2.76995	3.38765	3.39354	-3.10118	-2.74536	-6.48883	-6.1389	7.98229e-13
ENSG00000138670	RASGEF1B	0.0842628	0.0875815	0.184138	0.130244	5.67263	5.34357	6.55078	6.23772	0.01	0.01	0.011623	0.01	6.00238	5.34618	-3.10303	-3.86188	-9.10541	-9.20806	1.30784e-11
ENSG00000120903	CHRNA2	0.149745	0.0222347	0.0984165	0.122088	0.617199	0.331187	0.399137	0.373395	0.01	0.01	0.01	0.01	2.46324	1.80878	-3.10416	-3.46274	-5.5674	-5.27152	5.96397e-05
ENSG00000174672	BRSK2	1.40058	1.1615	1.24757	1.26136	94.6284	88.7388	95.0768	102.227	0.0995591	0.196375	0.213745	0.117495	6.16128	6.2972	-3.11397	-2.92113	-9.27524	-9.21833	4.60621e-15
ENSG00000161270	NPHS1	0.0565232	0.117499	0.138688	0.250901	1.69874	1.50334	2.24985	2.39603	0.01	0.01	0.01	0.0212249	4.20167	3.57593	-3.1212	-3.64119	-7.32286	-7.21711	2.49312e-08
ENSG00000237082	COX5BP6	4.87457	4.55989	12.11	3.70932	59.1858	71.9836	85.4932	94.8084	0.01	1.07075	0.537908	3.84391	3.79735	3.51065	-3.1259	-1.85208	-6.92325	-5.36274	5.13201e-07
ENSG00000176887	SOX11	110.321	96.0151	101.52	106.373	322.46	323.137	343.102	337.619	15.4905	8.0726	13.0059	15.2176	1.64563	1.71122	-3.1304	-2.88087	-4.77603	-4.5921	7.11284e-11
ENSG00000146013	GFRA3	1.00886	1.04859	0.789031	0.623753	9.70245	7.56916	9.6627	10.6914	0.224704	0.01	0.01	0.01	3.06947	3.84871	-3.13195	-6.1424	-6.20142	-9.99111	2.40253e-08
ENSG00000177181	RIMKLA	0.068714	0.10713	0.12645	0.119827	13.7675	13.0658	13.1626	11.7654	0.01	0.01	0.01	0.0129013	7.25358	6.66134	-3.13623	-3.42678	-10.3898	-10.0881	3.03209e-13
ENSG00000254844	RP11-728F11.3	0.127768	1.1952	0.58781	0.121532	1.22878	3.49966	2.54284	2.07087	0.01	0.140329	0.140992	0.01	1.83758	2.70137	-3.13759	-2.23201	-4.97517	-4.93338	0.000714682
ENSG00000018236	CNTN1	0.137284	0.0856147	0.113686	0.1567	14.9853	12.6379	13.8661	11.4678	0.01	0.015078	0.0302986	0.0154654	6.95335	6.5499	-3.15189	-2.56274	-10.1052	-9.11264	4.28318e-13
ENSG00000155980	KIF5A	0.804953	0.819582	0.922038	1.06256	235.225	206.906	237.279	233.714	0.0914732	0.0902129	0.0906393	0.166555	8.0883	7.89072	-3.16051	-2.94792	-11.2488	-10.8386	2.2317e-15
ENSG00000128011	LRFN1	8.1224	6.64001	4.47855	4.80341	32.4748	32.7867	36.3263	36.3729	0.880837	0.768467	1.07423	1.95338	2.1443	2.96944	-3.162	-1.61625	-5.3063	-4.58569	2.74155e-09
ENSG00000182379	NXPH4	8.75449	7.40871	9.46373	10.4659	54.059	58.7944	53.6739	63.2822	0.74586	1.05083	1.47812	1.94009	2.80366	2.55298	-3.1693	-2.5436	-5.97296	-5.09658	7.63095e-11
ENSG00000067141	NEO1	25.7355	19.1366	20.8699	22.1291	68.8528	61.2818	66.1198	65.5943	2.30017	2.57465	4.9639	3.18322	1.53611	1.61504	-3.2024	-2.39994	-4.73851	-4.01497	2.02599e-09
ENSG00000232520	AC012507.3	0.0908197	0.0943966	0.01	0.259161	1.52851	1.5142	1.29914	1.41539	0.01	0.01	0.01	0.01	4.03808	3.33416	-3.21114	-3.7504	-7.24921	-7.08456	1.33012e-05
ENSG00000168243	GNG4	2.92618	2.1527	1.62595	2.15078	129.927	117.782	120.539	116.579	0.338571	0.208691	0.0629033	0.171242	5.60799	5.97232	-3.21421	-4.01166	-8.8222	-9.98399	6.22549e-13
ENSG00000261241	RP11-883G14.1	0.175668	0.01	0.0808175	0.0835468	1.58385	1.04601	2.18508	1.53312	0.01	0.01	0.01	0.01	3.82419	4.49964	-3.21465	-3.03883	-7.03884	-7.53846	1.56052e-05
ENSG00000241163	LINC00877	0.273062	0.283816	0.460624	0.389602	1.2857	1.05687	1.78319	1.47526	0.01	0.0499843	0.01	0.01	2.07265	1.93827	-3.2147	-5.40977	-5.28736	-7.34804	4.77799e-07
ENSG00000215218	UBE2QL1	0.166776	0.173345	0.10961	0.158636	3.66612	2.83735	2.60793	3.50513	0.0265329	0.01	0.0525822	0.0268396	4.25709	4.51026	-3.21878	-1.75595	-7.47587	-6.26622	5.73562e-10
ENSG00000127903	ZNF835	0.0734142	0.114458	0.0675498	0.01	1.05906	1.35515	1.18714	1.73908	0.01	0.01	0.01	0.01	3.68373	5.23777	-3.23168	-1.95512	-6.91541	-7.19289	3.16077e-06
ENSG00000225783	MIAT	1.9346	1.30056	1.60859	1.18177	102.938	116.654	128.577	126.818	0.197658	0.146201	0.137099	0.169951	6.08485	6.51614	-3.23395	-3.1839	-9.3188	-9.70004	2.00084e-14
ENSG00000155974	GRIP1	2.70921	2.3466	2.00314	2.10147	11.0696	11.4653	11.0726	10.0328	0.287345	0.247962	0.231339	0.181666	2.15614	2.36229	-3.2395	-3.31301	-5.39565	-5.67531	6.02929e-12
ENSG00000167614	TTYH1	4.05943	2.66164	3.62805	3.4461	91.8815	93.6899	86.9803	95.7268	0.226849	0.479408	0.272949	0.311425	4.78714	4.69083	-3.25042	-3.59759	-8.03756	-8.28843	1.21895e-13
ENSG00000205837	LINC00487	0.0934181	0.0970974	0.0429779	0.0888586	1.01073	0.667511	0.813403	0.75706	0.01	0.01	0.01	0.01	3.13897	3.57437	-3.25184	-2.72068	-6.3908	-6.29505	4.31414e-06
ENSG00000253596	CTD-2320G14.2	0.01	0.181194	0.481207	0.497458	6.28706	4.98257	7.80631	7.60712	0.01	0.01	0.01	0.01	5.88126	3.97723	-3.25696	-5.61274	-9.13823	-9.58997	2.62192e-06
ENSG00000108924	HLF	0.186949	0.145734	0.114677	0.266737	1.1799	1.07609	1.33711	1.01003	0.0173497	0.0171107	0.0859577	0.01	2.76153	2.62147	-3.27114	-1.99089	-6.03267	-4.61236	5.90027e-07
ENSG00000137261	KIAA0319	0.161511	0.0915668	0.10808	0.0977635	14.1208	11.2958	13.6064	12.7411	0.01	0.0161263	0.01	0.0496216	6.65005	6.99997	-3.27601	-1.78764	-9.92606	-8.78761	3.29015e-12
ENSG00000265683	RP11-173M1.5	1.41476	1.61753	1.43193	1.74943	7.14321	7.41332	6.33524	5.64443	0.157555	0.155385	0.156119	0.318752	2.26318	1.91288	-3.27645	-2.74403	-5.53964	-4.65691	2.20124e-08
ENSG00000142700	DMRTA2	0.12757	0.0662972	0.176069	0.242687	2.49208	3.34231	2.5389	3.53887	0.01	0.01	0.0703867	0.01	4.91144	3.85936	-3.277	-2.38108	-8.18844	-6.24044	2.75484e-08
ENSG00000171224	C10orf35	8.63479	9.45141	8.15597	9.23093	70.2741	64.5202	73.6634	67.1659	1.19138	0.671409	1.0962	2.06597	2.8978	3.01787	-3.27935	-2.45901	-6.17715	-5.47689	3.31989e-11
ENSG00000162174	ASRGL1	4.89137	3.80135	3.69548	4.75934	18.0451	18.3305	18.6993	19.3582	0.549725	0.345005	0.569474	1.28909	2.06509	2.17034	-3.28028	-2.18559	-5.34537	-4.35592	5.53172e-09
ENSG00000265254	CTD-2350C19.2	1.46039	0.867377	0.191962	1.58756	3.76204	5.46601	3.8926	5.98254	0.01	0.229137	0.23022	0.235023	1.98708	2.47231	-3.28304	-1.93543	-5.27011	-4.40774	3.01587e-05
ENSG00000179774	ATOH7	0.346074	0.503586	0.827917	0.658367	1.2481	1.23642	1.98018	2.24367	0.0770812	0.01	0.0763786	0.01	1.54801	1.50685	-3.28645	-4.10489	-4.83447	-5.61174	1.66376e-05
ENSG00000149926	FAM57B	0.919827	0.673583	0.923291	1.13343	194.817	189.06	210.653	218.207	0.116405	0.0459206	0.0692065	0.0942004	7.91238	7.70401	-3.29515	-3.65381	-11.2075	-11.3578	2.88296e-15
ENSG00000267466	RP11-13K12.5	0.81491	0.544504	1.55319	1.43954	4.68832	3.25803	6.4439	3.62859	0.01	0.12786	0.01	0.01	2.54731	1.75089	-3.30171	-7.22532	-5.84901	-8.9762	1.51086e-06
ENSG00000172575	RASGRP1	1.60444	1.35166	1.24318	1.57433	20.7091	18.9867	26.8268	22.4463	0.150467	0.148394	0.111821	0.114154	3.74722	4.12831	-3.30616	-3.64018	-7.05337	-7.76849	1.31113e-13
ENSG00000181908	AP003774.4	0.396098	0.182977	0.242971	0.125588	2.80411	1.78203	1.75181	2.52408	0.01	0.0483374	0.01	0.01	2.98546	3.53625	-3.31125	-4.20383	-6.29672	-7.74008	1.57076e-07
ENSG00000095370	SH2D3C	8.05114	9.484	8.84846	9.38128	46.888	44.3451	47.319	50.9703	1.02115	0.736886	1.13523	0.428295	2.37931	2.43074	-3.31822	-3.54342	-5.69752	-5.97416	6.51911e-11
ENSG00000204033	LRIT2	0.0648099	0.134725	0.149082	0.246587	0.623292	0.887596	0.88677	1.09084	0.01	0.01	0.01	0.01	2.92068	2.32139	-3.31857	-4.30622	-6.23925	-6.62761	1.00234e-05
ENSG00000158457	TSPAN33	3.379	2.52698	2.35077	2.66533	16.7932	16.5379	20.6564	18.1357	0.229453	0.362066	0.181889	0.789155	2.49662	2.95113	-3.31968	-2.36896	-5.8163	-5.32009	1.90951e-09
ENSG00000125355	TMEM255A	3.86566	2.93723	4.3909	4.61526	70.0594	60.7996	69.8711	68.3052	0.445345	0.234245	0.117676	0.120131	4.26572	3.93946	-3.32341	-5.24305	-7.58913	-9.1825	6.03338e-12
ENSG00000172264	MACROD2	0.326461	0.27334	0.283695	0.172515	3.75014	3.42345	3.39525	3.00744	0.010099	0.0497992	0.0500346	0.0408628	3.58014	3.81091	-3.3239	-2.32739	-6.90404	-6.13829	2.28791e-10
ENSG00000174611	KY	0.0533287	0.147811	0.0327125	0.0676345	0.406026	0.740942	0.707565	0.554072	0.01	0.01	0.01	0.01	2.51156	3.65223	-3.33013	-2.32693	-5.84168	-5.97915	1.06864e-05
ENSG00000237732	AC010980.2	0.16027	0.0416456	0.184335	0.228672	6.74343	6.10771	5.08358	5.64491	0.01	0.01	0.01	0.01	5.992	4.69914	-3.33568	-4.36809	-9.32768	-9.06723	1.43509e-08
ENSG00000111249	CUX2	0.188278	0.0139781	0.0866189	0.140712	3.20108	3.059	2.20811	3.03484	0.01	0.01	0.01	0.01	4.95193	4.52751	-3.33811	-3.50672	-8.29004	-8.03423	1.44482e-07
ENSG00000158258	CLSTN2	1.26136	0.783691	1.3616	1.14617	24.8121	20.1154	22.2285	19.5128	0.0706279	0.13157	0.209952	0.277838	4.45739	4.057	-3.33829	-2.36207	-7.79569	-6.41907	1.22991e-10
ENSG00000007171	NOS2	0.0492593	0.153598	0.0453244	0.117138	9.20828	11.1166	9.86485	11.5153	0.01	0.01	0.01	0.01	6.64664	7.04003	-3.34239	-3.02203	-9.98903	-10.0621	8.29638e-10
ENSG00000233932	CTXN2	0.133489	0.0693733	0.0921194	0.126974	0.481423	0.755119	0.747197	0.748935	0.01	0.01	0.01	0.0375946	2.60774	2.77162	-3.34243	-2.20268	-5.95017	-4.9743	2.00394e-06
ENSG00000161958	FGF11	4.19546	4.07254	4.59157	5.43225	27.7508	24.9158	26.8058	26.3382	0.22641	0.588675	0.407902	0.270667	2.67128	2.40647	-3.34252	-3.88479	-6.0138	-6.29127	3.73348e-11
ENSG00000155629	PIK3AP1	0.560262	0.657467	0.216181	0.378199	1.84675	2.36755	2.31549	1.87023	0.060381	0.0595491	0.0598306	0.0610788	1.7911	2.81602	-3.34393	-2.29746	-5.13503	-5.11348	6.74885e-08
ENSG00000168743	NPNT	0.134515	0.157289	0.12377	0.143943	0.687257	0.740897	1.02483	0.922399	0.0187253	0.01	0.0556639	0.01	2.29108	2.86267	-3.3446	-2.02751	-5.63568	-4.89018	5.99232e-07
ENSG00000148826	NKX6-2	0.19388	0.01	0.178393	0.0922086	26.2208	20.3185	30.6276	35.7751	0.01	0.01	0.01	0.01	7.83459	7.93893	-3.34965	-3.7581	-11.1842	-11.697	3.35457e-09
ENSG00000163075	PCDP1	0.127834	0.0775069	0.0588114	0.0911963	0.268934	0.444028	0.410775	0.411731	0.01	0.01	0.01	0.01	1.7958	2.45499	-3.35995	-2.90696	-5.15575	-5.36196	1.79989e-06
ENSG00000235034	C19orf81	0.810781	0.601938	0.532868	0.991554	13.5063	13.7937	18.5854	12.2747	0.01	0.127212	0.01	0.01	4.27236	4.33941	-3.36399	-6.25212	-7.63635	-10.5915	8.0159e-10
ENSG00000140481	CCDC33	3.06123	3.20206	2.76287	3.41257	10.8058	11.053	13.3151	15.4611	0.173714	0.428302	0.40881	0.417339	1.80322	2.22026	-3.37905	-2.90207	-5.18227	-5.12233	3.99324e-10
ENSG00000266954	RP11-701H16.4	0.01	0.198707	0.351812	0.545539	8.04386	5.91951	3.56701	5.24378	0.01	0.01	0.01	0.01	6.06403	3.29553	-3.3834	-5.4876	-9.44743	-8.78313	1.10053e-05
ENSG00000185739	SRL	0.108229	0.206234	0.215764	0.274524	4.98746	4.68299	5.83366	5.285	0.0200882	0.01	0.01	0.01	4.94262	4.50321	-3.38562	-4.61556	-8.32824	-9.11877	1.15877e-10
ENSG00000104435	STMN2	0.60963	0.49786	0.841399	2.36092	2264.62	1992.48	2465.46	2404.75	0.01	0.0956517	0.0961038	0.147163	11.9084	10.5706	-3.38991	-3.71851	-15.2983	-14.2892	5.09246e-12
ENSG00000178235	SLITRK1	5.87167	6.47404	6.8628	7.98139	28.2108	24.8284	24.8965	22.9758	0.353459	0.806112	0.350237	0.402237	2.10305	1.68929	-3.41235	-4.30211	-5.51539	-5.99141	2.76922e-10
ENSG00000255847	RP11-167N4.2	0.218527	0.757112	0.402142	0.485009	2.10162	1.64821	1.72153	0.998993	0.0811209	0.01	0.01	0.01	1.94241	1.61663	-3.42049	-5.47111	-5.3629	-7.08774	2.41625e-05
ENSG00000226239	RP1-310O13.7	0.204378	0.01	0.235065	0.194403	4.48392	4.44195	4.19465	4.0133	0.01	0.01	0.01	0.01	5.37976	4.2564	-3.42209	-4.42448	-8.80185	-8.68088	2.98776e-07
ENSG00000149575	SCN2B	0.141234	0.073398	0.146196	0.13434	1.20971	0.840977	1.22974	0.814396	0.01	0.01	0.01	0.0198878	3.25618	2.86523	-3.42379	-3.23056	-6.67997	-6.09579	4.12206e-08
ENSG00000081803	CADPS2	3.41013	2.55334	2.03729	2.9516	9.34531	8.00677	9.75005	9.69213	0.197984	0.355011	0.196179	0.182065	1.54089	1.9624	-3.43081	-3.72133	-4.9717	-5.68373	2.21753e-10
ENSG00000260469	RP11-8P11.3	0.01	0.205981	0.547037	0.942518	3.57357	2.8321	4.43711	3.95328	0.01	0.01	0.01	0.01	4.89037	2.49386	-3.43283	-6.21874	-8.32321	-8.71259	0.000100865
ENSG00000101204	CHRNA4	0.164905	0.0856997	0.119218	0.268896	32.5964	30.7483	33.0977	33.6006	0.0131176	0.01	0.01	0.0132692	7.98167	7.42503	-3.43835	-4.05999	-11.42	-11.485	1.51257e-13
ENSG00000260831	GHc-362H12.3	0.229379	0.429143	0.337689	0.109092	1.43389	1.36584	1.68338	1.00094	0.01	0.0503856	0.0759357	0.0775199	2.08799	2.58692	-3.44695	-1.54174	-5.53494	-4.12866	6.63781e-06
ENSG00000151322	NPAS3	0.634416	0.578423	0.59398	0.730494	9.9548	7.97943	7.36525	7.56279	0.0619753	0.0488971	0.0736924	0.100306	3.88626	3.49453	-3.45142	-2.92827	-7.33767	-6.4228	2.09132e-12
ENSG00000203930	LINC00632	4.13738	5.36653	6.54407	4.06555	18.6208	15.9626	18.7141	19.6103	0.342714	0.525766	0.67918	0.808908	1.86349	1.85289	-3.45196	-2.83384	-5.31544	-4.68673	3.16175e-09
ENSG00000107736	CDH23	0.391055	0.258654	0.588792	0.512866	2.92749	1.96867	2.64585	2.09796	0.00659846	0.0520604	0.0457682	0.046723	2.91379	2.10637	-3.46937	-3.57421	-6.38316	-5.68059	1.74291e-08
ENSG00000228252	COL6A4P2	0.215739	0.224235	0.570702	0.410418	2.46383	2.505	3.28731	3.69842	0.01	0.0296184	0.01	0.0303793	3.49742	2.83191	-3.47318	-4.60274	-6.97059	-7.43465	4.17791e-08
ENSG00000261168	RP11-68I18.10	5.55783	4.45434	6.28451	4.84071	14.5702	16.268	18.3243	16.4467	0.447433	0.441268	0.665031	0.603471	1.62296	1.64405	-3.49391	-3.13264	-5.11688	-4.77669	2.9563e-10
ENSG00000261496	RP13-514E23.1	2.14956	1.8957	2.21759	1.0533	18.6369	14.8165	18.7165	19.0037	0.0725413	0.286167	0.07188	0.366898	3.04785	3.52758	-3.49535	-2.89812	-6.5432	-6.4257	2.75125e-09
ENSG00000130283	GDF1	33.4376	31.0491	20.134	24.8286	104.828	90.817	97.2013	97.3253	3.01188	2.70035	2.26093	3.60063	1.60116	2.11317	-3.49687	-2.93937	-5.09804	-5.05254	3.18555e-11
ENSG00000162415	ZSWIM5	1.30991	1.04323	0.70438	0.889982	23.9479	20.9279	18.7059	19.8099	0.189452	0.0186842	0.0563175	0.0766566	4.25328	4.5944	-3.49898	-3.58376	-7.75227	-8.17816	4.29239e-11
ENSG00000186642	PDE2A	0.100247	0.193505	0.382133	0.245196	19.1787	18.7774	19.5949	23.265	0.0159486	0.01	0.0158032	0.0161329	7.01359	6.09426	-3.50087	-4.29596	-10.5145	-10.3902	7.71468e-12
ENSG00000187486	KCNJ11	0.160508	0.0667317	0.0590745	0.0916042	13.6998	11.6983	12.578	13.9681	0.01	0.01	0.035424	0.01	6.80437	7.46088	-3.50614	-1.72995	-10.3105	-9.19083	3.9984e-12
ENSG00000091428	RAPGEF4	1.65174	1.41822	1.24227	1.10662	5.73249	5.64462	5.324	5.17522	0.111967	0.15775	0.380389	0.226523	1.88984	2.16023	-3.5087	-1.95242	-5.39854	-4.11265	9.02456e-09
ENSG00000187672	ERC2	1.59473	1.18588	1.39576	1.3319	10.8013	9.6811	11.0471	9.79579	0.129949	0.113919	0.0715357	0.0146056	2.88091	2.93382	-3.51123	-4.98482	-6.39214	-7.91863	7.7891e-11
ENSG00000176399	DMRTA1	1.45904	1.34374	1.25753	1.61621	16.9405	19.6412	22.5595	22.6811	0.123408	0.121707	0.0407609	0.124834	3.70619	3.97662	-3.51533	-4.1172	-7.22152	-8.09382	1.09559e-12
ENSG00000236924	RP11-390F4.6	1.75985	0.81296	1.25943	1.30196	7.52217	9.08183	8.26967	9.02029	0.01	0.214762	0.01	0.01	2.69011	2.75493	-3.51688	-7.00079	-6.20699	-9.75572	6.33352e-08
ENSG00000138028	CGREF1	2.38622	2.01995	1.15439	1.31037	13.2192	12.2459	9.94485	13.4031	0.328752	0.0540371	0.0814388	0.221701	2.53092	3.24378	-3.5249	-3.02339	-6.05583	-6.26717	9.5297e-09
ENSG00000223802	CERS1	25.6172	24.0863	15.8655	19.4309	76.6101	66.4759	71.8235	72.2987	2.26272	2.05061	1.66642	3.27866	1.52546	2.0297	-3.52647	-2.83545	-5.05193	-4.86516	1.96509e-10
ENSG00000260296	RP11-395I6.3	8.17849	7.76141	9.97905	6.5955	31.9534	32.5012	34.6104	38.7917	0.890998	0.488179	0.784779	0.901295	2.01564	2.14685	-3.53076	-3.29723	-5.5464	-5.44408	1.49498e-10
ENSG00000124302	CHST8	0.235902	0.315248	0.217058	0.192333	18.2308	16.0936	17.8994	18.2772	0.0375304	0.01	0.01	0.0379641	5.96065	6.46543	-3.53552	-3.09345	-9.49617	-9.55888	1.77504e-12
ENSG00000027644	INSRR	0.100817	0.272447	0.222632	0.287689	8.31414	9.79714	9.53067	12.2427	0.01	0.0221456	0.111251	0.0681434	5.60055	5.41502	-3.53751	-1.50827	-9.13805	-6.92329	4.89715e-10
ENSG00000153902	LGI4	0.658879	0.6376	0.815298	0.821221	2.84054	2.27281	3.13695	3.39919	0.101209	0.01	0.050143	0.01	1.97967	1.99781	-3.54326	-4.76609	-5.52293	-6.7639	1.05736e-07
ENSG00000270581	RP11-811P12.3	0.224081	0.01	0.01	0.213144	3.23256	5.8709	2.78729	3.07315	0.01	0.01	0.01	0.01	5.28133	4.71496	-3.54894	-3.47991	-8.83027	-8.19487	3.05277e-05
ENSG00000259448	RP11-16E12.1	0.01	0.224943	0.0995658	0.154392	5.39852	5.41242	6.12427	7.35273	0.01	0.01	0.01	0.0609503	5.52404	5.72976	-3.55424	-1.83971	-9.07828	-7.56948	6.36304e-09
ENSG00000114646	CSPG5	2.1202	1.27325	1.21385	1.29966	21.9198	20.6204	18.7832	19.9136	0.183646	0.103495	0.103984	0.132692	3.648	3.94443	-3.56292	-3.40872	-7.21092	-7.35316	2.78311e-12
ENSG00000253690	RP11-380I10.4	0.115956	0.120523	0.426775	0.01	11.0124	6.35227	11.1061	8.52968	0.01	0.01	0.01	0.01	6.19829	5.49045	-3.56364	-4.44882	-9.76194	-9.93927	4.9445e-07
ENSG00000100077	ADRBK2	9.42794	7.63852	7.28934	8.71126	32.34	30.6455	35.4052	31.5928	0.800911	0.641774	0.80601	0.797508	1.88385	2.06599	-3.56434	-3.31881	-5.44819	-5.3848	4.68529e-14
ENSG00000105290	APLP1	42.0585	34.0362	39.3459	45.6252	462.792	432.428	468.495	480.563	2.56907	3.8314	6.23994	5.48274	3.55637	3.48145	-3.57155	-2.85767	-7.12792	-6.33912	3.08595e-11
ENSG00000164049	FBXW12	0.235902	0.275842	0.406984	0.140243	0.886221	0.877926	0.696903	1.0294	0.0328391	0.01	0.01	0.01	1.78548	1.65748	-3.57842	-4.77407	-5.3639	-6.43155	3.82044e-06
ENSG00000165731	RET	0.787497	0.43333	0.625138	0.822499	37.9977	31.5553	47.2104	41.641	0.017196	0.0847955	0.0340785	0.01	5.83218	5.93962	-3.58134	-5.03748	-9.41352	-10.9771	3.16837e-12
ENSG00000118971	CCND2	45.9872	44.587	50.6046	48.5818	193.528	193.034	192.146	190.748	3.85703	3.70919	2.02988	2.8655	2.09353	1.94873	-3.58145	-4.34065	-5.67498	-6.28938	2.15991e-11
ENSG00000151948	GLT1D1	0.296066	0.215409	0.0544832	0.0563232	6.05059	5.50034	6.51836	6.09058	0.01	0.0325172	0.01	0.01	4.4972	6.83026	-3.58855	-2.46997	-8.08575	-9.30023	1.75801e-09
ENSG00000116544	DLGAP3	0.491379	0.322567	0.452127	0.295197	21.9186	18.9107	20.4274	20.3137	0.0576026	0.01	0.0285387	0.0291341	5.64853	5.76861	-3.58978	-3.69577	-9.23831	-9.46438	1.06352e-12
ENSG00000240685	RP11-286H14.6	1.96119	3.85036	3.20805	1.45092	15.9796	13.754	17.0763	14.1275	0.242675	0.239332	0.01	0.736439	2.3551	2.74364	-3.5918	-2.64191	-5.9469	-5.38555	4.50827e-07
ENSG00000272970	RP11-329B9.4	1.02707	1.06752	1.48504	2.233	6.17346	6.11568	9.67282	6.95136	0.163399	0.01	0.01	0.330575	2.55265	2.16067	-3.5945	-3.4485	-6.14714	-5.60917	9.22541e-07
ENSG00000141750	STAC2	1.10134	0.540563	0.64743	0.960291	2.53764	2.84179	2.62571	2.63182	0.102209	0.0336004	0.0337592	0.103391	1.71208	1.70937	-3.59571	-3.55119	-5.30779	-5.26056	2.72704e-08
ENSG00000203685	C1orf95	0.118814	0.123493	0.145764	0.175801	6.72901	6.99618	6.96254	8.4107	0.01	0.01	0.01	0.01	5.82384	5.57917	-3.59877	-4.00704	-9.42261	-9.58621	5.2514e-11
ENSG00000149970	CNKSR2	0.77571	0.582299	0.383308	0.587546	4.93892	4.32815	3.7166	4.04762	0.0799879	0.0315544	0.0475553	0.0809123	2.77062	2.99951	-3.60583	-2.91785	-6.37645	-5.91736	3.13353e-10
ENSG00000171885	AQP4	0.154409	0.0891611	0.0789302	0.0815958	0.824991	0.510793	0.725579	0.898389	0.01	0.01	0.01	0.01	2.45528	3.33864	-3.60626	-3.00473	-6.06154	-6.34338	7.05281e-07
ENSG00000267868	RP11-120K24.3	0.079301	0.164848	0.437798	0.01	1.90664	1.98323	1.28233	1.77966	0.01	0.01	0.01	0.01	3.99389	2.77355	-3.60969	-4.48478	-7.60358	-7.25832	0.000107617
ENSG00000269814	CTC-273B12.10	0.01	0.235472	0.416905	0.01	5.99164	4.31677	5.91778	6.49646	0.01	0.01	0.01	0.01	5.39212	4.86194	-3.61749	-4.41584	-9.00961	-9.27778	6.16835e-06
ENSG00000239887	C1orf226	4.49281	3.64527	5.25177	4.62239	11.987	13.8949	15.9671	19.0051	0.255277	0.402816	0.126475	0.335695	1.66919	1.82448	-3.62833	-4.41716	-5.29751	-6.24164	8.00815e-10
ENSG00000150627	WDR17	2.61837	2.25652	2.13076	2.27781	9.79105	10.9216	11.211	10.4825	0.175836	0.216767	0.0725973	0.0741119	2.08707	2.29888	-3.63422	-4.90928	-5.7213	-7.20816	8.61496e-11
ENSG00000112530	PACRG	0.599611	0.498582	0.514933	0.342208	6.48743	5.427	6.7623	8.32302	0.0445172	0.0439039	0.01	0.0450317	3.43951	4.13747	-3.6346	-3.9612	-7.0741	-8.09867	2.82264e-10
ENSG00000170893	TRH	0.519987	0.32428	0.38276	1.03868	251.542	272.286	242.097	278.252	0.0579084	0.01	0.01	0.117155	9.27718	8.51599	-3.63604	-3.48269	-12.9132	-11.9987	1.77778e-13
ENSG00000019505	SYT13	0.170664	0.216804	0.139583	0.198408	61.3669	50.9013	59.0622	58.9632	0.0211178	0.01	0.01	0.0640854	8.17866	8.4479	-3.63827	-2.18972	-11.8169	-10.6376	6.80685e-14
ENSG00000270171	RP11-338N10.1	0.239055	0.01	0.0549897	0.113694	2.15536	2.41987	3.04788	3.57655	0.01	0.01	0.01	0.01	4.19931	5.29541	-3.63839	-3.07625	-7.8377	-8.37165	1.61281e-06
ENSG00000144893	MED12L	1.91541	1.58421	1.37992	1.48855	6.50612	6.66847	6.62039	6.45287	0.199694	0.0805675	0.251839	0.348912	1.91249	2.18826	-3.64235	-2.25544	-5.55484	-4.44371	2.94655e-09
ENSG00000146216	TTBK1	0.109666	0.142482	0.0378398	0.0391177	25.7574	21.7452	23.4116	23.6028	0.01	0.01	0.01	0.0154427	7.55759	9.25482	-3.6562	-1.59681	-11.2138	-10.8516	6.09879e-13
ENSG00000175161	CADM2	0.154434	0.117712	0.0852589	0.127311	5.79241	5.40714	6.37762	6.19992	0.01	0.0113078	0.01	0.01	5.36291	5.88677	-3.67493	-3.40986	-9.03784	-9.29663	1.52828e-12
ENSG00000139910	NOVA1	6.83914	7.07658	8.12981	6.81697	27.5698	28.592	29.3926	30.7374	0.535886	0.550992	0.169468	0.103802	2.01287	2.00825	-3.67845	-5.77336	-5.69133	-7.78161	2.92834e-08
ENSG00000197177	GPR123	0.173979	0.0821961	0.0727644	0.225665	23.9572	21.8117	26.3428	24.8266	0.01	0.01	0.01	0.01	7.48109	7.42175	-3.67906	-3.89932	-11.1602	-11.3211	4.24038e-11
ENSG00000213420	GPC2	46.3485	42.7002	42.0775	46.6932	163.859	157.494	166.271	174.095	2.93239	4.01337	4.62533	5.35746	1.85149	1.93893	-3.68039	-3.15257	-5.53188	-5.0915	2.16779e-12
ENSG00000272769	RP11-725P16.2	0.366897	0.635578	0.506383	0.581649	4.26364	3.4955	3.57493	4.87931	0.0680991	0.01	0.202435	0.01	2.95233	2.95795	-3.68212	-2.35663	-6.63445	-5.31458	2.21005e-07
ENSG00000235903	CPB2-AS1	0.4162	0.324444	0.478692	0.420629	2.18897	2.1375	3.13856	2.78911	0.0289688	0.0285697	0.01	0.01	2.54634	2.72056	-3.68618	-5.49076	-6.23252	-8.21132	5.39095e-09
ENSG00000272884	RP11-104H15.10	4.24157	4.1776	4.46515	5.39114	25.6287	23.4036	25.1358	25.0788	0.165017	0.488232	0.408783	0.312983	2.54198	2.34899	-3.68797	-3.77144	-6.22995	-6.12043	2.5051e-11
ENSG00000231107	RP11-389K14.3	0.193212	0.0669406	0.118519	0.0612607	1.47105	1.61068	0.961328	1.52564	0.01	0.01	0.01	0.01	3.56631	3.79009	-3.70129	-3.16816	-7.2676	-6.95825	4.55627e-06
ENSG00000249825	CTD-2201I18.1	0.0954408	0.165333	0.175634	0.211826	0.841387	0.71985	0.712298	0.713956	0.01	0.01	0.105319	0.01	2.58182	1.88011	-3.70473	-1.74842	-6.28655	-3.62853	4.22382e-05
ENSG00000152208	GRID2	0.214214	0.0477109	0.267496	0.160096	1.71066	1.71287	1.4655	1.85045	0.01	0.01	0.0168846	0.0172369	3.70826	2.95512	-3.71108	-3.64748	-7.41934	-6.6026	4.7887e-08
ENSG00000267267	CTD-3199J23.4	5.0353	5.6954	6.02981	5.42345	43.9302	42.9899	46.6983	48.2379	0.412321	0.40664	0.245137	0.375377	3.01795	3.0512	-3.71181	-4.20615	-6.72975	-7.25735	4.2492e-13
ENSG00000247416	RP11-629G13.1	0.208311	0.0541287	0.527094	0.0990717	4.6328	5.02357	4.46969	4.2853	0.01	0.01	0.01	0.0586666	5.20142	3.80549	-3.71391	-3.18886	-8.91534	-6.99435	8.17412e-08
ENSG00000120907	ADRA1A	0.175878	0.0914024	0.161829	0.200752	4.73608	3.28842	4.24414	3.72774	0.01	0.01	0.01	0.01	4.90799	4.45855	-3.74028	-4.18023	-8.64827	-8.63878	2.32232e-09
ENSG00000229415	SFTA3	0.198559	0.0687929	0.0608992	0.125912	5.33092	7.25156	5.35128	4.95113	0.01	0.01	0.01	0.01	5.55653	5.78526	-3.74067	-3.22351	-9.2972	-9.00877	8.5249e-09
ENSG00000142549	IGLON5	0.276275	0.451246	0.689988	0.71329	45.1691	34.4998	41.9255	46.4025	0.01	0.0433479	0.0435528	0.01	6.77488	5.976	-3.76949	-4.7117	-10.5444	-10.6877	4.00188e-12
ENSG00000108830	RND2	21.4199	20.253	20.512	23.3588	94.9746	86.3598	102.349	108.087	1.44492	1.60638	1.45778	1.75394	2.12147	2.26205	-3.77161	-3.77184	-5.89309	-6.0339	3.07588e-14
ENSG00000206052	DOK6	0.482108	0.478319	0.453679	0.312666	11.7889	10.7521	11.1895	9.68554	0.01	0.0601708	0.0967283	0.0123433	4.55274	4.76764	-3.77473	-2.81272	-8.32747	-7.58036	2.79492e-10
ENSG00000158560	DYNC1I1	0.318572	0.16556	0.1675	0.194801	14.4436	13.3057	15.5958	14.8661	0.0253413	0.01	0.0502206	0.01	5.8409	6.39368	-3.77597	-2.58886	-9.61688	-8.98253	4.48356e-12
ENSG00000110148	CCKBR	0.193697	0.0805305	0.0712899	0.368487	1.9094	1.8454	1.83111	1.20748	0.01	0.01	0.01	0.01	3.77529	2.78856	-3.7773	-4.4587	-7.55259	-7.24726	5.20455e-06
ENSG00000258986	TMEM179	0.134978	0.140294	0.124196	0.12839	6.42568	6.23693	7.15237	5.72174	0.01	0.01	0.01	0.01	5.52357	5.67155	-3.78279	-3.6587	-9.30636	-9.33026	1.88776e-10
ENSG00000110723	EXPH5	0.398399	0.325356	0.384031	0.324818	1.81312	1.81874	2.00583	2.17607	0.0211275	0.0312546	0.0314024	0.064115	2.32713	2.56061	-3.78836	-2.89164	-6.11549	-5.45225	2.37328e-10
ENSG00000227045	RP11-98D18.1	0.266459	0.01	0.245174	0.760363	23.0634	23.4822	26.1839	23.9194	0.01	0.01	0.01	0.300172	7.39543	5.63887	-3.789	-1.69682	-11.1844	-7.33569	2.76971e-09
ENSG00000179083	FAM133A	0.0903279	0.187771	0.166225	0.200478	1.26686	1.506	1.42318	1.50157	0.01	0.01	0.01	0.0339188	3.31771	2.99563	-3.79753	-3.0617	-7.11523	-6.05734	4.91487e-08
ENSG00000165659	DACH1	0.991357	1.07003	0.73675	0.961106	62.4301	62.2317	61.7748	62.7742	0.106156	0.0418775	0.231415	0.0859066	5.91826	6.19686	-3.79962	-2.4197	-9.71788	-8.61655	1.76179e-13
ENSG00000134376	CRB1	0.25977	0.106364	0.101402	0.15724	7.92066	6.61845	7.33389	6.93875	0.0175329	0.00864569	0.00868656	0.0177356	5.31142	5.78615	-3.80591	-3.29114	-9.11733	-9.07729	2.24821e-12
ENSG00000117480	FAAH	3.74214	4.9293	3.95459	5.28638	14.0304	14.1197	14.6095	14.1815	0.495141	0.12208	0.163543	0.62608	1.69879	1.6395	-3.81241	-3.54881	-5.51121	-5.18831	1.5589e-08
ENSG00000181444	ZNF467	17.3429	15.2497	21.1497	19.4665	61.6419	61.5129	72.9997	70.1208	0.418957	1.90065	6.39312	3.30563	1.91786	1.8171	-3.81259	-2.06619	-5.73045	-3.88329	1.76744e-05
ENSG00000174607	UGT8	1.26952	0.591511	0.362518	0.478861	4.34167	4.19677	4.51958	3.46579	0.12188	0.01	0.144923	0.0986307	2.19787	3.24653	-3.81881	-1.78852	-6.01668	-5.03505	4.45879e-07
ENSG00000253931	RP11-909N17.2	1.32348	1.76864	1.73966	1.25888	5.22766	4.05292	8.23122	6.83602	0.01	0.207656	0.417274	0.01	1.58562	2.32908	-3.82848	-2.81103	-5.4141	-5.14011	5.46489e-06
ENSG00000112182	BACH2	3.28971	2.33778	2.22426	2.42934	20.3044	17.7361	19.4533	17.7426	0.2458	0.150065	0.0695883	0.0828802	2.75697	2.99873	-3.82941	-4.93176	-6.58638	-7.93049	2.74884e-11
ENSG00000240086	RP11-657O9.1	3.69488	3.44852	3.81602	3.15591	21.0306	19.1276	20.9163	22.6572	0.335902	0.165637	0.33284	0.339784	2.49101	2.64382	-3.83218	-3.37369	-6.32319	-6.01751	1.87483e-11
ENSG00000267260	CTD-2162K18.4	2.15741	2.60742	2.26206	2.38618	7.17748	6.33354	6.98971	6.443	0.223498	0.110209	0.221461	0.565202	1.50364	1.53099	-3.83577	-2.56287	-5.33941	-4.09386	4.34839e-08
ENSG00000118004	COLEC11	0.0794848	0.206538	0.109703	0.378027	1.48107	0.899257	0.54378	0.891893	0.01	0.01	0.01	0.01	3.05696	1.55757	-3.83806	-4.60801	-6.89502	-6.16558	0.000125881
ENSG00000242808	SOX2-OT	1.02172	0.54811	0.798585	0.762853	14.2902	13.5022	13.8022	12.8207	0.0489394	0.0603315	0.0242467	0.0123763	4.14601	4.09172	-3.84463	-5.41399	-7.99064	-9.5057	2.23218e-12
ENSG00000231769	RP1-8B1.4	0.278358	0.01	0.128061	0.01	1.67315	1.82324	2.07746	2.08229	0.01	0.01	0.01	0.01	3.59993	4.91311	-3.84979	-2.78724	-7.44972	-7.70035	4.56868e-05
ENSG00000243069	ARHGEF26-AS1	0.0943825	0.196199	0.0217108	0.0897759	1.44664	1.0959	1.4675	1.26499	0.01	0.01	0.0260378	0.01	3.12926	4.61527	-3.86087	-1.62929	-6.99013	-6.24456	1.78424e-07
ENSG00000270773	RP13-685P2.7	1.09128	1.27604	1.12962	0.259505	3.27972	4.71109	2.71484	2.55108	0.151913	0.01	0.01	0.01	1.75508	1.92251	-3.86996	-6.11804	-5.62505	-8.04054	2.91738e-05
ENSG00000231460	RP11-321L2.1	0.143851	0.149516	0.13236	0.01	1.12405	1.71312	1.43146	2.06251	0.01	0.01	0.01	0.01	3.27367	4.61725	-3.87464	-2.83147	-7.14831	-7.44872	1.45496e-05
ENSG00000234338	RP11-797H7.1	1.2191	0.866971	2.00728	1.40372	9.71887	6.87707	9.33786	7.67966	0.0714552	0.0704707	0.01	0.289124	2.99197	2.31875	-3.87758	-3.51138	-6.86955	-5.83013	7.5559e-08
ENSG00000196361	ELAVL3	0.648099	0.404175	0.576451	0.780858	566.884	537.086	586.423	596.73	0.0240585	0.0474542	0.0238392	0.0730097	10.035	9.76767	-3.87917	-3.80887	-13.9141	-13.5765	2.01e-15
ENSG00000157423	HYDIN	0.109834	0.109594	0.105103	0.0919368	1.42073	1.28186	1.65037	1.34199	0.01	0.00482528	0.00484809	0.01	3.62252	3.92473	-3.88762	-3.73014	-7.51014	-7.65487	2.3599e-11
ENSG00000254377	LINC00966	0.236241	0.0613863	0.380397	0.308977	12.3184	13.856	11.0195	11.5606	0.01	0.01	0.01	0.01	6.45851	5.03362	-3.89543	-5.10721	-10.3539	-10.1408	7.62803e-09
ENSG00000177098	SCN4B	0.364147	0.397413	0.469082	0.363693	1.35706	1.56119	1.44945	1.45282	0.0405533	0.01	0.0401836	0.020511	1.93807	1.80119	-3.91308	-3.77829	-5.85115	-5.57947	2.45484e-08
ENSG00000087495	PHACTR3	0.270001	0.0350793	0.0931623	0.11236	7.62769	6.97349	6.84288	7.46894	0.01	0.01	0.01	0.01	5.58075	6.12177	-3.93112	-3.36122	-9.51187	-9.48299	8.46751e-09
ENSG00000144406	UNC80	0.144202	0.160984	0.167082	0.0762021	5.81053	4.95474	6.27792	5.63997	0.01	0.01	0.01	0.00601654	5.14055	5.61434	-3.93161	-3.92501	-9.07217	-9.53935	4.81224e-12
ENSG00000136014	USP44	1.77597	1.13137	1.37054	1.0717	8.47108	7.18646	8.17123	7.47597	0.085067	0.104869	0.168583	0.150588	2.42909	2.67963	-3.93611	-2.9358	-6.3652	-5.61543	6.58434e-11
ENSG00000144485	HES6	47.8165	36.4744	30.3378	36.9817	156.484	161.874	141.503	165.25	2.69909	2.77282	2.3959	3.29909	1.9172	2.18798	-3.94526	-3.56326	-5.86246	-5.75124	7.65368e-13
ENSG00000204466	DGKK	0.236093	0.072174	0.115006	0.0792601	1.4191	1.24043	1.05376	1.00427	0.01	0.01	0.01	0.01	3.10892	3.40515	-3.94611	-3.27996	-7.05503	-6.68512	4.81631e-07
ENSG00000257467	RP11-121G22.3	0.101634	0.211273	0.18703	0.01	1.40506	1.6945	1.2642	0.886997	0.01	0.01	0.01	0.01	3.30826	3.44865	-3.96766	-3.30035	-7.27592	-6.74899	4.3805e-05
ENSG00000262880	RP11-104H15.7	7.23879	7.14499	7.71474	9.06506	45.3263	40.0645	38.4134	42.4634	0.173989	0.743565	0.689612	0.586666	2.56964	2.269	-3.97051	-3.71671	-6.54014	-5.98571	1.05244e-10
ENSG00000263749	OOSP1P2	0.01	0.30457	1.07849	0.557455	3.52267	3.48969	3.64492	4.01874	0.01	0.01	0.01	0.01	4.47845	2.22791	-3.97531	-6.35398	-8.45376	-8.58189	0.00020645
ENSG00000001561	ENPP4	0.995141	1.31016	0.81391	1.15692	13.505	12.4042	14.7439	13.7581	0.0492551	0.097153	0.01	0.0249122	3.49044	3.85419	-3.97689	-5.81893	-7.46733	-9.67312	7.96807e-11
ENSG00000184811	TUSC5	0.286022	0.0297286	0.184222	0.0544123	1.23783	0.987808	1.92118	1.60471	0.01	0.01	0.01	0.01	2.81736	3.88512	-3.98071	-3.57673	-6.79808	-7.46185	1.1114e-05
ENSG00000101098	RIMS4	6.49995	6.32472	3.8902	6.31425	75.5269	63.3146	66.1801	69.3392	0.220021	0.585871	0.196213	0.200307	3.43645	3.73123	-3.99219	-4.68566	-7.42864	-8.41689	6.56958e-11
ENSG00000106536	POU6F2	0.224925	0.155856	0.172465	0.237719	30.84	25.209	31.3197	30.6915	0.013916	0.01	0.01	0.01	7.20158	7.24011	-3.99291	-4.3582	-11.1945	-11.5983	2.02144e-14
ENSG00000183379	SYNDIG1L	0.196886	0.122784	0.579708	0.0749107	3.4083	3.70466	3.28168	3.97664	0.01	0.01	0.01	0.01	4.47579	3.47091	-3.99851	-5.03258	-8.47431	-8.50349	2.50656e-06
ENSG00000143126	CELSR2	31.8913	21.6942	23.5425	24.7099	128.762	115.406	119.887	116.594	1.68813	1.63743	2.3253	2.89924	2.18796	2.29305	-4.01017	-3.20722	-6.19813	-5.50027	8.22484e-12
ENSG00000170370	EMX2	0.126162	0.196696	0.377272	0.330011	47.661	58.596	52.2967	62.2493	0.01	0.01	0.01	0.035531	8.36244	7.33942	-4.01283	-3.95737	-12.3753	-11.2968	5.44085e-13
ENSG00000136237	RAPGEF5	4.03583	3.71478	3.34394	4.48821	14.6637	13.6058	14.2735	14.92	0.212427	0.264632	0.742255	1.16488	1.86687	1.89816	-4.02207	-2.038	-5.88894	-3.93616	1.25745e-06
ENSG00000006283	CACNA1G	0.593242	0.330325	0.770043	0.735589	3.79508	3.65863	4.04538	3.26232	0.01	0.0465402	0.01169	0.01	3.01267	2.27905	-4.02987	-6.11719	-7.04254	-8.39624	1.04117e-08
ENSG00000167654	ATCAY	0.2094	0.296791	0.315283	0.615646	179.53	159.532	174.987	169.745	0.01	0.0209078	0.01	0.01	9.38765	8.53259	-4.03364	-5.5406	-13.4213	-14.0732	6.87952e-14
ENSG00000103175	WFDC1	0.725973	0.821145	0.628689	0.67023	3.46526	2.82254	4.11671	3.78021	0.0237789	0.0703537	0.11781	0.0240537	2.02297	2.60398	-4.03875	-3.19473	-6.06172	-5.79871	4.32095e-09
ENSG00000213424	KRT222	0.194737	0.134937	0.149317	0.432208	0.858379	0.9663	1.25151	0.728374	0.01	0.01	0.01	0.01	2.46853	1.7675	-4.04297	-4.86177	-6.5115	-6.62927	1.8313e-05
ENSG00000090932	DLL3	17.8363	15.272	13.4473	15.2841	67.1597	66.765	74.2306	77.7831	1.31256	0.690387	1.47401	1.99159	2.01616	2.4035	-4.047	-3.05145	-6.06315	-5.45495	2.84798e-11
ENSG00000172348	RCAN2	8.43697	7.24041	7.12461	7.7348	157.043	134.783	154.656	147.542	0.185444	0.762039	0.0918769	0.0625291	4.21835	4.34605	-4.04844	-6.5885	-8.26679	-10.9346	3.53698e-10
ENSG00000184985	SORCS2	0.686561	0.526705	0.451227	0.559758	14.876	13.5492	15.7786	15.5504	0.0182045	0.0538611	0.0721542	0.147319	4.5502	4.95366	-4.07344	-2.20364	-8.62365	-7.15731	4.5942e-12
ENSG00000115361	ACADL	0.117332	0.219516	0.151143	0.0892843	0.620626	0.642763	0.84649	0.497373	0.01	0.01	0.01	0.01	1.90713	2.48271	-4.07403	-3.58753	-5.98115	-6.07024	8.36871e-06
ENSG00000137766	UNC13C	0.142194	0.197058	0.283476	0.281778	2.792	2.00384	2.63833	2.70356	0.01	0.01	0.01	0.01	3.82135	3.24038	-4.08429	-4.82083	-7.90564	-8.0612	1.63774e-08
ENSG00000140600	SH3GL3	0.428173	0.317883	0.281407	0.465457	4.77964	5.02628	5.74441	5.7959	0.01	0.0335904	0.0337492	0.01	3.7163	3.94969	-4.0972	-4.09352	-7.8135	-8.04321	1.80724e-10
ENSG00000248050	RP11-422N16.3	0.100345	0.243359	0.307764	0.22271	0.562939	0.717004	0.790503	0.75064	0.01	0.01	0.01	0.01	1.89684	1.53865	-4.10309	-4.72921	-5.99994	-6.26786	2.41404e-05
ENSG00000236283	AC013463.2	0.01	0.336706	0.447106	0.308136	12.6566	10.4163	7.45458	10.905	0.01	0.01	0.01	0.01	6.05635	4.60345	-4.11564	-5.23887	-10.172	-9.84231	4.78162e-07
ENSG00000108852	MPP2	22.0237	17.5778	19.7329	22.5974	70.0413	60.5248	67.7466	63.4296	1.01383	1.26905	1.17845	1.30165	1.72115	1.63174	-4.11663	-4.09322	-5.83779	-5.72496	6.34732e-14
ENSG00000173157	ADAMTS20	0.243457	0.104195	0.0658851	0.0544881	0.757506	1.15973	0.819422	0.732054	0.01	0.01	0.01	0.01	2.46331	3.68806	-4.11957	-2.58944	-6.58289	-6.2775	4.98674e-06
ENSG00000231453	AC018470.4	1.16777	1.30713	1.84591	1.39558	9.4309	8.55813	13.5199	15.1567	0.01	0.131545	0.0330418	0.0337311	2.86168	3.14514	-4.12803	-5.60125	-6.98971	-8.7464	2.95194e-09
ENSG00000177519	RPRM	0.279683	0.0726745	0.386012	0.133016	5.29549	4.74632	4.00074	4.01005	0.01	0.01	0.01	0.01	4.83284	3.94806	-4.13897	-4.69774	-8.9718	-8.6458	2.93719e-07
ENSG00000169129	AFAP1L2	0.259381	0.251624	0.477323	0.279618	4.28228	4.2422	4.47391	4.78615	0.01	0.018992	0.0763272	0.0584397	4.0602	3.61277	-4.13961	-2.48971	-8.19981	-6.10248	2.72751e-09
ENSG00000130540	SULT4A1	1.54424	1.26911	1.45393	1.26391	85.5676	79.5917	85.9016	80.5942	0.119982	0.0394429	0.158518	0.121369	5.87542	5.93689	-4.14134	-3.27955	-10.0168	-9.21643	1.00494e-14
ENSG00000204624	PTCHD2	0.786545	0.521823	0.846901	0.89142	18.2068	16.7211	16.1534	17.3803	0.0372739	0.0367604	0.0923353	0.056557	4.73854	4.26985	-4.14343	-3.54535	-8.88197	-7.8152	7.98804e-13
ENSG00000011083	SLC6A7	0.374779	0.267808	0.431051	0.378767	4.42094	4.26798	3.23411	2.48233	0.0260858	0.01	0.051696	0.01	3.75721	2.81945	-4.15439	-3.71435	-7.9116	-6.5338	8.98096e-09
ENSG00000124785	NRN1	0.175119	0.182016	0.161131	0.055524	5.89457	6.04794	4.86479	4.73055	0.01	0.01	0.0644146	0.01	5.06349	5.46887	-4.1584	-1.54174	-9.22189	-7.0106	1.68583e-09
ENSG00000268203	CTD-2396E7.9	0.347477	0.01	0.01	0.661036	471.19	449.813	445.617	465.716	0.01	0.01	0.01	0.01	11.3311	10.4074	-4.15978	-5.06832	-15.4909	-15.4757	2.1473e-11
ENSG00000101331	CCM2L	0.316959	0.0411804	0.364551	0.150745	1.09547	1.17959	1.72488	1.77829	0.01	0.01	0.01	0.01	2.66731	2.76519	-4.16245	-4.68733	-6.82976	-7.45252	1.99341e-05
ENSG00000232237	ASCL5	0.253834	0.105532	0.186846	0.144867	2.31912	1.451	2.5259	2.97483	0.01	0.01	0.01	0.01	3.39108	4.05162	-4.16738	-4.05186	-7.55846	-8.10348	5.67121e-07
ENSG00000046653	GPM6B	9.85942	7.17718	6.03678	6.56819	51.2666	49.8587	46.959	46.9327	0.363307	0.577264	0.499994	0.653344	2.56943	2.897	-4.17896	-3.45011	-6.74839	-6.34711	2.09132e-12
ENSG00000004848	ARX	0.214576	0.148685	0.197435	0.340172	93.1641	87.0535	79.4933	80.793	0.01	0.01	0.01	0.01	8.95452	8.21988	-4.18293	-4.74848	-13.1375	-12.9684	2.07529e-12
ENSG00000197444	OGDHL	2.0125	2.33456	1.55414	1.69209	9.20214	8.53823	9.36504	8.87156	0.140077	0.0986763	0.337085	0.627509	2.02892	2.49	-4.18645	-1.75077	-6.21537	-4.24077	1.40801e-07
ENSG00000143847	PPFIA4	0.974813	0.947127	0.994438	0.977628	9.80809	8.71942	9.08091	8.95672	0.0590001	0.0465498	0.0935396	0.119364	3.26903	3.19323	-4.18657	-3.21144	-7.4556	-6.40467	1.43008e-12
ENSG00000134709	HOOK1	0.255443	0.109325	0.221212	0.185805	2.87212	3.05997	3.17739	2.11694	0.01	0.01	0.01	0.01	4.02349	3.70129	-4.18891	-4.34702	-8.2124	-8.04831	1.42497e-08
ENSG00000176204	LRRTM4	0.266164	0.0988024	0.209916	0.271257	6.90221	5.97725	6.92892	6.56579	0.01	0.01	0.01	0.01	5.14116	4.80969	-4.18969	-4.58848	-9.33086	-9.39818	1.08595e-09
ENSG00000112562	SMOC2	0.127546	0.238625	0.0938862	0.0970569	1.13464	1.09365	0.729798	0.286237	0.01	0.01	0.01	0.01	2.60534	2.41174	-4.19445	-3.25507	-6.79979	-5.66681	9.54372e-05
ENSG00000185105	MYADML2	1.00426	0.695878	0.65453	0.557228	3.16911	2.89028	2.13401	2.39983	0.0466	0.0459579	0.369401	0.0471385	1.83352	1.90363	-4.19915	-1.54057	-6.03267	-3.44421	7.09043e-06
ENSG00000146938	NLGN4X	0.267225	0.204657	0.207056	0.33445	1.60623	1.17246	1.66197	1.40281	0.0156629	0.01	0.01	0.01	2.5579	2.50074	-4.20067	-4.7589	-6.75857	-7.25964	3.87509e-09
ENSG00000261754	CTC-523E23.1	0.783431	0.930613	0.755176	1.10005	15.2034	16.2607	16.7056	15.3491	0.0830923	0.01	0.01	0.01	4.19823	4.11087	-4.2026	-6.53545	-8.40083	-10.6463	6.16655e-11
ENSG00000070886	EPHA8	0.191962	0.17957	0.0883141	0.0730372	7.84612	8.75569	7.30657	6.82098	0.01	0.01	0.01	0.01	5.48171	6.45216	-4.21542	-3.01213	-9.69712	-9.4643	1.37091e-09
ENSG00000152268	SPON1	56.5429	32.3992	38.3987	41.4477	160.154	151.226	186.902	184.017	3.14845	1.62265	0.825225	1.62324	1.80774	2.21581	-4.22047	-5.02728	-6.02821	-7.24308	7.40548e-09
ENSG00000267748	CTB-102L5.4	7.15829	8.4192	6.0665	8.60073	43.2533	37.24	43.1142	45.798	0.41957	0.41379	0.415746	0.424419	2.36941	2.59978	-4.22438	-4.12578	-6.59379	-6.72556	2.18552e-11
ENSG00000139352	ASCL1	0.332859	0.043246	0.0765674	0.01	50.2185	51.5818	41.8692	39.4767	0.01	0.01	0.01	0.01	8.08039	9.87603	-4.23306	-2.11382	-12.3135	-11.9899	6.77155e-09
ENSG00000007264	MATK	0.273414	0.103339	0.0686109	0.0472853	17.8686	18.6189	18.365	17.3851	0.01	0.01	0.01	0.0280006	6.59764	8.26897	-4.23555	-1.60874	-10.8332	-9.87771	1.31763e-11
ENSG00000266413	RP11-88L24.4	0.105167	0.273272	0.241915	0.150051	2.52854	2.25438	3.79362	3.67133	0.01	0.01	0.0580259	0.01	3.65976	4.25133	-4.24199	-2.52658	-7.90175	-6.77791	4.41568e-08
ENSG00000267784	RP11-171I2.1	0.1719	0.208448	0.18453	0.0545032	0.654392	0.648266	0.641465	0.428639	0.01	0.01	0.01	0.01	1.77607	2.16247	-4.24925	-3.57914	-6.02531	-5.74161	3.64886e-05
ENSG00000163618	CADPS	0.619005	0.424049	0.537197	0.769446	21.3095	18.488	21.7078	21.7057	0.0470015	0.00772566	0.01	0.00792412	5.25379	5.0542	-4.25241	-6.18782	-9.5062	-11.242	3.90131e-12
ENSG00000260838	RP11-531A24.3	0.187233	0.194607	0.0861384	0.267142	1.0879	1.78381	1.55263	1.32281	0.01	0.01	0.01	0.01	2.91087	3.0249	-4.2549	-4.14274	-7.16577	-7.16764	1.10318e-06
ENSG00000224883	CTA-250D10.19	3.19544	1.24549	1.10257	2.84951	92.6742	91.8067	92.6609	102.339	0.222413	0.01	0.01	0.01	5.37647	5.62471	-4.2561	-7.62647	-9.63256	-13.2512	3.10951e-11
ENSG00000008277	ADAM22	4.9082	3.82394	4.24501	3.84382	20.3428	18.097	20.1063	18.0958	0.271895	0.18493	0.353028	0.312973	2.13819	2.23965	-4.25662	-3.60233	-6.39482	-5.84198	1.12385e-12
ENSG00000135116	HRK	0.195111	0.187195	0.0828577	0.199864	3.03115	3.18151	3.62173	2.7694	0.01	0.01	0.01	0.0338148	4.02241	4.49862	-4.25666	-2.68989	-8.27907	-7.18851	1.32058e-09
ENSG00000122584	NXPH1	0.262455	0.121241	0.0536645	0.194169	8.65905	6.42482	7.72626	5.30826	0.01	0.01	0.01	0.01	5.2969	5.71682	-4.26189	-3.6313	-9.55879	-9.34812	1.41581e-08
ENSG00000101443	WFDC2	0.0744235	0.309419	0.273914	0.353956	3.31034	3.54525	2.86978	3.71156	0.01	0.01	0.0821263	0.01	4.15869	3.38984	-4.26244	-2.76878	-8.42114	-6.15862	9.7843e-08
ENSG00000198914	POU3F3	3.27572	2.45658	2.82329	3.21444	53.5607	48.4422	47.1929	54.8247	0.115443	0.182164	0.320294	0.01	4.15335	4.07867	-4.26763	-4.19218	-8.42098	-8.27085	1.17529e-10
ENSG00000230707	RP11-364B14.3	0.376752	0.01	0.346657	0.716728	11.7758	15.5541	14.059	14.5614	0.01	0.01	0.01	0.01	6.14292	4.75031	-4.27334	-5.73252	-10.4163	-10.4828	1.66711e-07
ENSG00000204060	FOXO6	8.23513	7.44495	8.56393	9.38351	38.259	42.1915	40.3337	45.1334	0.191064	0.612402	1.94055	1.063	2.35917	2.25159	-4.28655	-2.57904	-6.64572	-4.83063	8.00239e-08
ENSG00000165863	C10orf82	0.2133	0.177361	0.392523	0.162312	3.12832	1.77814	2.494	2.34024	0.01	0.01	0.01	0.01	3.65069	3.12316	-4.28785	-4.79399	-7.93854	-7.91714	6.69087e-07
ENSG00000268120	CTD-3193O13.11	20.509	26.6058	21.5665	20.3881	295.118	301.354	322.239	320.874	1.2021	1.18554	4.08391	1.04228	3.6622	3.93817	-4.30253	-3.03287	-7.96473	-6.97104	8.4076e-11
ENSG00000205704	LINC00634	1.75818	2.67085	2.98658	2.89448	18.1282	17.2337	20.2714	21.0773	0.0753075	0.14854	0.01	0.0761778	2.99713	2.81369	-4.3064	-6.09262	-7.30354	-8.90631	4.16942e-10
ENSG00000267372	AC005330.2	1.96535	1.87253	2.56184	2.02521	10.3366	9.65473	12.5288	11.7412	0.182393	0.01	0.0903651	0.01	2.381	2.40354	-4.31818	-5.51424	-6.69918	-7.91777	5.31798e-09
ENSG00000112232	KHDRBS2	0.308736	0.0916846	0.162328	0.0419525	1.21949	0.73535	0.987504	0.604879	0.01	0.01	0.01	0.01	2.28746	2.96256	-4.32345	-3.35248	-6.61091	-6.31504	8.15938e-05
ENSG00000149294	NCAM1	1.51444	0.820537	1.475	1.58611	103.9	97.4016	97.8463	89.3362	0.0897108	0.0265424	0.13334	0.145196	6.4298	5.93424	-4.32807	-3.45812	-10.7579	-9.39237	2.33125e-12
ENSG00000133985	TTC9	0.591451	0.286881	0.199542	0.187528	10.0253	9.76713	9.78469	9.41418	0.0219557	0.0216532	0.0652666	0.0222094	4.49404	5.63228	-4.33207	-2.14564	-8.82611	-7.77792	1.04031e-10
ENSG00000112599	GUCA1B	1.47857	0.768404	0.510174	0.703204	4.2215	3.08147	4.13811	5.64554	0.01	0.101496	0.101975	0.208206	1.7005	3.01134	-4.33293	-1.96785	-6.03342	-4.97919	1.02226e-06
ENSG00000226455	RP3-512E2.2	1.87006	0.800352	0.607298	0.523173	11.505	7.7292	7.93618	8.22894	0.01	0.120818	0.121389	0.247843	2.84854	3.83789	-4.35143	-1.61433	-7.19997	-5.45221	1.36761e-07
ENSG00000179915	NRXN1	0.397559	0.26614	0.446403	0.365337	15.6501	12.9518	15.6484	14.9372	0.0225123	0.01	0.0074357	0.01	5.42944	5.23569	-4.35147	-5.5409	-9.78091	-10.7766	9.50069e-13
ENSG00000260391	RP11-71H17.7	0.52683	0.5897	0.633899	0.616759	19.3409	17.2777	18.0462	19.3008	0.01	0.0445093	0.134159	0.0456527	5.03548	4.90024	-4.35638	-2.79813	-9.39186	-7.69836	1.02067e-11
ENSG00000053328	METTL24	0.289891	0.120523	0.106694	0.386039	2.02126	2.07139	1.44235	1.44571	0.01	0.01	0.01	0.01	3.31788	2.55122	-4.35901	-4.62273	-7.67689	-7.17396	5.78605e-06
ENSG00000130054	FAM155B	0.358821	0.0532789	0.117913	0.146275	25.635	23.6552	23.6235	22.8157	0.01	0.01	0.01	0.01	6.90216	7.45763	-4.36492	-3.72349	-11.2671	-11.1811	6.04274e-10
ENSG00000215452	ZNF663P	0.237615	0.17641	0.437268	0.193729	1.46906	1.61701	1.39337	1.86215	0.01	0.01	0.01	0.01	2.89798	2.36718	-4.37164	-4.97956	-7.26962	-7.34674	1.44582e-06
ENSG00000130475	FCHO1	5.93662	4.48247	4.26698	5.61254	38.9375	37.9069	39.8175	43.4197	0.261238	0.23782	0.816393	0.752116	2.88271	3.07471	-4.38388	-2.65505	-7.26659	-5.72976	6.52572e-10
ENSG00000214456	PLIN5	0.405859	0.310833	0.471713	0.609553	0.975812	1.78072	1.75365	1.99742	0.0237887	0.01	0.0471438	0.0481273	1.94343	1.79458	-4.40674	-3.50454	-6.35017	-5.29912	3.21905e-07
ENSG00000161082	CELF5	0.529292	0.479152	0.565562	0.568421	99.9797	90.4225	97.5453	96.7931	0.01	0.0375048	0.01	0.0961707	7.56078	7.42103	-4.40791	-3.41694	-11.9687	-10.838	1.14586e-13
ENSG00000136267	DGKB	0.410894	0.314689	0.208934	0.421695	9.37221	7.59757	10.1279	9.61219	0.0240838	0.01	0.01	0.0121811	4.54768	4.96819	-4.41198	-4.82939	-8.95966	-9.79758	1.05406e-11
ENSG00000198570	RD3	0.40987	0.375894	0.443682	0.229333	10.898	9.84845	12.5358	11.0619	0.0268501	0.01	0.0266054	0.01	4.72262	5.13186	-4.41435	-4.20051	-9.13698	-9.33237	1.59059e-11
ENSG00000151079	KCNA6	0.292539	0.143087	0.110835	0.0818415	24.3278	21.3745	22.9032	23.7717	0.01	0.01	0.0189892	0.01	6.71303	7.92032	-4.44502	-2.73259	-11.1581	-10.6529	1.12875e-12
ENSG00000233593	RP4-665J23.1	1.68872	1.48097	1.60238	1.65649	20.1741	20.3309	21.7276	25.8903	0.029385	0.115921	0.174703	0.0594492	3.67569	3.86906	-4.44718	-3.79885	-8.12287	-7.66791	4.55629e-12
ENSG00000196220	SRGAP3	2.03373	1.25243	1.2241	1.49882	19.4802	19.668	18.8473	19.3534	0.0607203	0.0898255	0.0782168	0.0368532	3.57447	3.81037	-4.44813	-4.56458	-8.0226	-8.37495	5.33968e-13
ENSG00000206077	ZDHHC11B	0.57005	0.310358	0.774283	0.516407	8.61505	9.6982	8.91404	11.1346	0.0302303	0.01	0.0599095	0.01	4.37857	3.95729	-4.45182	-4.20651	-8.83039	-8.1638	4.20857e-10
ENSG00000162975	KCNF1	3.9559	3.69119	4.54987	6.07182	18.536	14.8292	18.061	16.3656	0.20025	0.148118	0.694484	0.354487	2.12536	1.69651	-4.45623	-3.33997	-6.58159	-5.03648	7.39376e-09
ENSG00000223572	CKMT1A	0.233152	0.207715	0.367762	0.285136	2.80285	3.33193	2.56868	2.07633	0.01	0.01	0.01	0.01	3.7986	2.83075	-4.46227	-5.02878	-8.26087	-7.85954	1.16608e-07
ENSG00000183908	LRRC55	0.342211	0.0988024	0.192423	0.235089	15.13	12.0903	15.5605	14.6723	0.01	0.01	0.01	0.0214171	5.94772	6.144	-4.46275	-3.76635	-10.4105	-9.91035	5.61292e-12
ENSG00000267424	CTD-2265O21.3	0.01	0.433982	0.128061	0.01	14.3891	13.7571	15.4078	13.1878	0.01	0.01	0.01	0.01	5.9863	7.69434	-4.47243	-2.78724	-10.4587	-10.4816	1.42506e-07
ENSG00000185818	NAT8L	6.00898	4.33371	2.67583	3.29944	31.0851	27.9359	26.8251	25.5551	0.273139	0.192411	0.405974	0.118412	2.51262	3.13195	-4.47353	-3.5103	-6.98615	-6.64225	8.34889e-10
ENSG00000077522	ACTN2	0.322662	0.374826	0.227032	0.180538	2.25889	1.46923	1.15684	1.46716	0.0211372	0.01	0.01	0.0213815	2.41821	2.68665	-4.48545	-3.69906	-6.90366	-6.38571	1.02878e-07
ENSG00000112294	ALDH5A1	12.119	9.67459	9.5922	10.4651	35.404	34.8953	36.2159	32.7491	0.456098	0.511152	0.328684	0.650111	1.68961	1.78174	-4.49387	-4.35698	-6.18348	-6.13872	8.25534e-13
ENSG00000256466	AP003026.1	2.0367	2.46973	2.49868	3.71315	32.0336	21.2232	21.745	27.7206	0.189014	0.01	0.01	0.01	3.56291	2.99334	-4.50104	-8.27887	-8.06395	-11.2722	1.9934e-09
ENSG00000271858	XXcos-LUCA11.4	4.10729	4.44693	4.09413	4.31378	34.7689	32.4054	36.4013	30.9384	0.0952935	0.281942	0.377699	0.385579	2.9732	3.00164	-4.5031	-3.46147	-7.4763	-6.4631	1.46381e-11
ENSG00000139292	LGR5	0.45051	0.264665	0.378477	0.447153	3.01402	2.47262	1.6324	1.92925	0.01	0.021513	0.01	0.0220656	2.93956	2.10898	-4.50428	-4.6864	-7.44384	-6.79538	1.51963e-08
ENSG00000178445	GLDC	7.64331	4.08697	3.98387	5.00093	31.9205	34.4367	30.6927	31.3425	0.172208	0.33967	0.146261	0.149312	2.50002	2.78753	-4.51829	-4.9259	-7.01831	-7.71343	3.37385e-11
ENSG00000261294	RP11-616M22.3	3.9559	4.1117	3.6399	4.34172	42.0688	30.0785	32.5519	35.6628	0.338884	0.01	0.335795	0.01	3.16073	3.09533	-4.53132	-4.52869	-7.69205	-7.62402	1.16071e-09
ENSG00000213023	SYT3	0.295247	0.167387	0.14818	0.127653	13.9714	14.6398	12.6534	12.4821	0.01	0.01	0.01	0.01	5.95057	6.50979	-4.5318	-3.78572	-10.4824	-10.2955	1.89812e-10
ENSG00000165194	PCDH19	0.579841	0.19724	0.300713	0.411149	2.0785	1.85817	1.86214	1.52472	0.0234815	0.01	0.0581686	0.0593822	2.34084	2.25028	-4.53663	-2.59831	-6.87747	-4.84859	1.76867e-07
ENSG00000272078	RP4-734G22.3	1.03853	0.971488	0.621121	0.864361	4.16678	3.64852	4.44056	4.14338	0.043371	0.0427734	0.100276	0.0731203	1.95909	2.53071	-4.54431	-3.09878	-6.5034	-5.62949	1.94656e-10
ENSG00000066032	CTNNA2	0.300182	0.283641	0.351532	0.415318	28.492	24.6504	26.7992	26.7424	0.01	0.014986	0.01	0.01	6.50819	6.12557	-4.54634	-5.26087	-11.0545	-11.3864	4.55215e-14
ENSG00000257520	RP11-896J10.3	0.276487	0.191585	0.01	0.175329	9.08507	11.9635	10.3175	9.42224	0.01	0.01	0.01	0.01	5.49084	6.73487	-4.54866	-3.21201	-10.0395	-9.94689	4.51956e-08
ENSG00000257060	RP11-266O8.1	0.394074	0.0744718	0.263706	0.238535	2.41176	2.68783	3.6095	2.59059	0.01	0.01	0.01	0.01	3.44412	3.62584	-4.55012	-4.65031	-7.99424	-8.27615	3.81146e-07
ENSG00000224747	AP001065.7	0.462055	0.01	0.340116	0.703204	1.77747	1.32063	1.14948	2.07387	0.01	0.01	0.101975	0.01	2.71436	1.62738	-4.56088	-3.21993	-7.27524	-4.84731	0.000218908
ENSG00000198719	DLL1	6.48099	5.42268	5.6353	5.79479	37.4365	37.7421	36.9622	38.0178	0.216527	0.284725	1.60915	1.56971	2.65892	2.71367	-4.56973	-1.84626	-7.22864	-4.55993	3.68575e-07
ENSG00000006210	CX3CL1	0.945501	0.857664	0.980698	1.04652	3.82324	3.99218	4.02007	3.8151	0.0191447	0.0566428	0.0758807	0.01	2.11579	1.95046	-4.57243	-4.56102	-6.68822	-6.51149	2.60251e-09
ENSG00000253230	LINC00599	0.22381	0.258472	0.526271	0.473082	20.3286	26.1798	26.5401	27.1909	0.01	0.01	0.01	0.01	6.59147	5.74861	-4.59181	-5.64292	-11.1833	-11.3915	4.94942e-10
ENSG00000165566	AMER2	0.281259	0.201611	0.330182	0.21218	21.0565	18.3646	20.7618	20.5562	0.01	0.01	0.01	0.01	6.35119	6.25137	-4.59356	-4.76118	-10.9448	-11.0126	6.53149e-12
ENSG00000183307	CECR6	2.1711	2.17225	2.07235	2.33534	46.053	43.8338	48.1561	46.9021	0.0903868	0.0891415	0.0223907	0.0228579	4.37123	4.43072	-4.59652	-6.60601	-8.96775	-11.0367	6.34732e-14
ENSG00000109991	P2RX3	0.157388	0.327174	0.108612	0.11228	65.2758	59.3229	71.946	69.7587	0.01	0.01	0.01	0.01	8.00639	9.32533	-4.59861	-3.46527	-12.605	-12.7906	1.49765e-11
ENSG00000128250	RFPL1	0.343761	0.14292	0.0632603	0.19619	1.23976	1.47379	2.13798	1.62865	0.01	0.01	0.01	0.01	2.47913	3.85974	-4.60491	-3.69739	-7.08404	-7.55713	8.18097e-06
ENSG00000236901	MIR600HG	5.41424	4.76996	4.47566	4.70856	16.7988	15.8228	16.9756	15.9221	0.191415	0.226533	0.208637	0.193627	1.67949	1.84076	-4.60686	-4.51294	-6.28636	-6.3537	7.98163e-14
ENSG00000204789	ZNF204P	3.23422	3.04145	3.5427	2.92987	14.8424	12.7165	17.4967	16.0013	0.085757	0.169151	0.0566502	0.086748	2.13468	2.37166	-4.62172	-5.49624	-6.7564	-7.8679	1.52028e-11
ENSG00000154645	CHODL	0.633251	0.519625	0.858667	0.760855	31.252	24.1722	27.1544	27.7162	0.01	0.0366055	0.01	0.150183	5.5872	5.08239	-4.62859	-3.33777	-10.2158	-8.42017	3.23646e-11
ENSG00000239482	RP11-90K6.1	0.326001	0.16942	0.29996	0.465135	1.66559	2.13529	1.11514	1.52418	0.01	0.01	0.01	0.01	2.93961	1.78646	-4.63058	-5.25757	-7.57019	-7.04402	1.68388e-05
ENSG00000007402	CACNA2D2	4.05293	3.07906	3.78909	3.77771	43.1263	38.9427	39.3589	36.2035	0.0906336	0.196647	0.0718459	0.14669	3.52446	3.31991	-4.63377	-5.11374	-8.15823	-8.43366	2.94557e-13
ENSG00000105613	MAST1	4.53417	4.54911	3.23039	3.84864	91.168	89.8085	97.2303	95.317	0.105198	0.259371	0.225851	0.248298	4.31644	4.76552	-4.63895	-3.90014	-8.9554	-8.66566	6.61382e-14
ENSG00000168528	SERINC2	29.658	28.3357	29.3591	28.0993	97.0196	100.009	105.693	111.44	0.943676	1.37997	2.19259	1.31666	1.76444	1.91799	-4.64144	-4.03328	-6.40587	-5.95127	7.4479e-12
ENSG00000111879	FAM184A	0.940328	0.784643	0.694608	0.667675	5.82723	5.5361	4.84334	6.06001	0.058997	0.01	0.0146148	0.0149197	2.71974	3.00067	-4.64389	-5.52748	-7.36364	-8.52815	2.59961e-10
ENSG00000105737	GRIK5	4.61548	4.49876	5.03952	5.8341	72.7719	63.7848	66.8516	65.2425	0.137067	0.225298	0.067909	0.138652	3.90523	3.60266	-4.6526	-5.71812	-8.55784	-9.32079	1.65731e-13
ENSG00000077327	SPAG6	0.410797	0.560406	0.614221	0.683808	1.41979	1.62054	1.82037	1.95265	0.0285928	0.01	0.0283322	0.01	1.64638	1.53939	-4.65337	-5.08162	-6.29975	-6.62102	5.22065e-08
ENSG00000203499	FAM83H-AS1	0.366875	0.40039	0.405082	0.209381	1.58774	1.79134	2.60117	2.28704	0.0204285	0.01	0.0404846	0.0206646	2.13883	2.99191	-4.65623	-3.32892	-6.79506	-6.32083	2.35749e-08
ENSG00000163449	TMEM169	9.01526	6.86568	8.3212	8.95277	47.6792	39.6027	47.2181	44.1115	0.284147	0.342506	0.437977	0.287431	2.45839	2.40248	-4.66349	-4.57366	-7.12187	-6.97615	1.64154e-13
ENSG00000113763	UNC5A	1.43999	1.44764	2.04175	1.93107	44.9233	37.9806	42.7826	41.44	0.01	0.103709	0.0520994	0.0265932	4.84348	4.40597	-4.66647	-5.65779	-9.50996	-10.0638	2.11628e-12
ENSG00000268950	AC114494.1	23.5858	24.2619	20.8068	22.8972	70.1535	79.0527	79.5446	88.5211	0.81236	1.06822	1.60991	2.19133	1.64079	1.94319	-4.6692	-3.52322	-6.30998	-5.46641	9.23637e-11
ENSG00000154162	CDH12	2.0647	2.38046	2.52239	2.16197	11.7221	12.253	14.8051	13.3253	0.057967	0.114337	0.01	0.01	2.43123	2.58621	-4.68921	-7.87171	-7.12044	-10.4579	1.30497e-09
ENSG00000269430	LRRC3DN	9.49066	7.36294	6.64342	7.73164	25.3842	22.5508	21.1251	23.2124	0.303424	0.349118	1.5534	1.0231	1.50802	1.62496	-4.69084	-2.48008	-6.19886	-4.10504	1.02523e-07
ENSG00000131831	RAI2	0.313816	0.20386	0.324842	0.597	5.61168	6.86719	7.12386	6.01557	0.01	0.01	0.129861	0.0441901	4.59129	3.83324	-4.69398	-2.40501	-9.28527	-6.23825	7.71476e-09
ENSG00000256443	RP11-794G24.1	0.112347	0.4087	0.361803	0.267158	1.48564	2.2076	2.16605	1.68084	0.01	0.01	0.01	0.01	2.8254	2.61265	-4.70334	-4.9749	-7.52874	-7.58755	5.61583e-06
ENSG00000102924	CBLN1	0.356854	0.164848	0.0729663	0.113146	3.71795	3.87203	3.15649	2.9661	0.01	0.01	0.0437543	0.01	3.8628	5.0399	-4.70516	-1.79172	-8.56795	-6.83162	1.52366e-08
ENSG00000205363	C15orf59	5.18	5.67504	4.16507	5.37107	35.2311	32.7895	34.7124	36.8877	0.311822	0.102509	0.360476	0.210284	2.64761	2.90849	-4.71144	-4.06245	-7.35904	-6.97093	6.16664e-12
ENSG00000075461	CACNG4	0.882469	0.885597	0.671981	0.868343	213.27	205.548	224.343	228.773	0.0338884	0.0334215	0.268636	0.1714	7.88801	8.2005	-4.71521	-1.80754	-12.6032	-10.008	3.13583e-14
ENSG00000150471	LPHN3	2.72737	1.98664	2.3404	2.11176	19.2746	17.5534	18.6999	18.0652	0.13099	0.0484445	0.01	0.01	2.96578	3.04576	-4.71542	-7.79836	-7.6812	-10.8441	7.31652e-09
ENSG00000104490	NCALD	10.27	7.19164	8.27282	10.7906	29.7506	26.0908	31.8808	30.169	0.299104	0.365218	0.254038	0.1873	1.67715	1.70262	-4.71616	-5.43278	-6.39331	-7.1354	2.18367e-12
ENSG00000188620	HMX3	0.43842	0.0911374	0.968157	1.66809	5.79753	5.53442	7.74382	5.90337	0.01	0.01	0.01	0.01	4.41947	2.37205	-4.72672	-7.04234	-9.14618	-9.41439	2.02351e-05
ENSG00000187323	DCC	5.37515	2.74399	3.72028	3.90247	85.7614	73.3032	87.5839	78.9808	0.278113	0.026122	0.52491	0.294723	4.29214	4.44963	-4.73807	-3.21726	-9.03021	-7.66689	1.3718e-09
ENSG00000130940	CASZ1	1.64224	1.31084	1.15208	1.57935	5.93359	5.47826	6.19595	6.04068	0.0707303	0.0398605	0.140171	0.0817689	1.95024	2.16348	-4.73892	-3.62141	-6.68916	-5.78489	5.87265e-11
ENSG00000260634	RP11-521O16.1	1.11797	1.23463	0.578625	1.86096	3.94792	3.16206	4.08493	4.00732	0.0778144	0.01	0.15421	0.157427	1.59559	1.72991	-4.74365	-2.9687	-6.33925	-4.6986	1.27427e-06
ENSG00000155961	RAB39B	1.26182	0.793013	1.08003	0.809463	29.0329	26.1401	30.077	28.903	0.0653596	0.01	0.01	0.0330575	4.74687	4.96416	-4.76909	-5.45559	-9.51596	-10.4197	2.48298e-12
ENSG00000105642	KCNN1	1.16526	0.403717	0.643305	0.492615	35.2384	33.9217	34.8508	38.2249	0.0288375	0.0284402	0.01	0.0291708	5.46205	6.00746	-4.7757	-4.85794	-10.2377	-10.8654	2.97216e-12
ENSG00000236404	RP11-125B21.2	0.420859	0.558944	0.322701	0.711677	2.27672	2.25541	1.97765	1.6616	0.01	0.0256796	0.051602	0.01	2.20962	1.81488	-4.77932	-4.06964	-6.98895	-5.88452	1.28783e-07
ENSG00000186479	RGS7BP	0.234879	0.317368	0.302563	0.245756	8.49905	7.99992	5.75554	6.67674	0.01	0.01	0.01	0.01	4.90092	4.50293	-4.78724	-4.77694	-9.68816	-9.27988	1.62849e-09
ENSG00000135447	PPP1R1A	0.284125	0.268469	0.237663	0.393102	16.5192	17.0105	17.0282	19.5153	0.01	0.01	0.01	0.01	5.92308	5.85637	-4.78815	-4.97903	-10.7112	-10.8354	2.39895e-11
ENSG00000225049	AC068279.2	0.544198	0.01	3.00436	0.01	12.43	9.0732	6.76914	12.2128	0.01	0.01	0.01	0.01	5.27801	2.6547	-4.79233	-7.23571	-10.0703	-9.89041	0.000448709
ENSG00000156925	ZIC3	0.323282	0.232625	0.434746	0.283849	14.23	14.6891	11.5378	10.4175	0.01	0.01	0.01	0.01	5.70104	4.93325	-4.79677	-5.16711	-10.4978	-10.1004	7.75308e-10
ENSG00000163995	ABLIM2	0.79929	0.777742	1.53348	1.50438	10.8762	8.74916	10.9152	9.54125	0.0378779	0.018678	0.112598	0.134105	3.63744	2.75143	-4.80139	-3.62221	-8.43883	-6.37364	2.78255e-09
ENSG00000172461	FUT9	0.277394	0.280527	0.20005	0.263855	9.24706	8.59802	8.38363	7.75818	0.01	0.01	0.01	0.01	4.99932	5.12083	-4.80199	-4.53576	-9.80131	-9.65659	1.07661e-11
ENSG00000253771	TPTE2P1	0.120367	0.437876	0.498383	0.171738	1.95344	1.14676	1.34749	1.9509	0.01	0.01	0.199237	0.01	2.4734	2.29927	-4.80282	-1.67928	-7.27622	-3.97855	0.000120284
ENSG00000118702	GHRH	0.18172	0.377753	0.836019	1.20995	5.67983	8.65641	10.1716	12.2344	0.01	0.01	0.200528	0.01	4.67945	3.45303	-4.806	-3.28071	-9.48545	-6.73373	4.64972e-07
ENSG00000167194	C16orf92	0.368981	0.191756	0.339506	0.263229	79.9538	77.4477	86.8593	88.9015	0.01	0.01	0.01	0.01	8.13291	8.18787	-4.80925	-4.91345	-12.9422	-13.1013	3.115e-12
ENSG00000119547	ONECUT2	0.861652	1.10631	1.49237	1.06668	19.3458	16.8936	22.9567	20.9959	0.0423344	0.0278341	0.0489399	0.0999218	4.20278	4.10227	-4.80974	-4.10357	-9.01252	-8.20583	1.76614e-11
ENSG00000237289	CKMT1B	0.156669	0.407099	0.216232	0.347719	6.0269	5.19308	6.30102	5.11114	0.01	0.01	0.01	0.01	4.31482	4.33886	-4.81703	-4.8175	-9.13185	-9.15636	1.30351e-08
ENSG00000127152	BCL11B	0.314256	0.381072	0.566258	0.411012	3.99822	3.08755	2.21507	2.49775	0.0145821	0.01	0.0577969	0.044252	3.34916	2.26976	-4.82201	-3.2595	-8.17117	-5.52926	2.87298e-08
ENSG00000183248	CTD-3193O13.9	14.9729	15.6572	14.6353	13.8525	212.577	224.869	230.852	240.837	0.532168	0.549828	1.23041	0.358878	3.83608	4.04942	-4.82318	-4.1639	-8.65927	-8.21331	8.41398e-12
ENSG00000156968	MPV17L	0.462147	0.622674	0.22049	0.29306	2.09883	1.99764	2.12908	1.85661	0.0190619	0.0187992	0.0188881	0.0578465	1.91693	2.95626	-4.8406	-2.74256	-6.75752	-5.69881	4.31765e-08
ENSG00000148541	FAM13C	1.61518	1.29869	1.47214	1.53635	14.5627	13.5917	13.476	12.3105	0.0848465	0.0167355	0.084073	0.01	3.27235	3.09951	-4.84222	-4.99911	-8.11457	-8.09862	6.43023e-11
ENSG00000154080	CHST9	0.303658	0.270529	0.478974	0.288837	3.70259	2.63471	2.1044	2.54197	0.01	0.01	0.01	0.01	3.46427	2.59728	-4.84345	-5.26268	-8.30772	-7.85996	4.10499e-07
ENSG00000092850	TEKT2	6.34384	6.80987	7.75088	8.16102	23.5039	24.5843	24.7077	37.9906	0.0579084	0.399774	0.229522	0.585776	1.87022	1.97832	-4.84498	-4.28664	-6.7152	-6.26495	3.47327e-09
ENSG00000254489	RP5-1024C24.1	0.56575	0.01	0.104111	0.215255	3.94469	5.25527	2.5334	3.5268	0.01	0.01	0.01	0.01	3.99811	4.24608	-4.84737	-3.99714	-8.84548	-8.24322	1.60882e-05
ENSG00000157388	CACNA1D	0.293395	0.285891	0.320576	0.122095	2.03908	1.94356	2.16687	1.65751	0.01	0.01	0.01	0.01	2.78138	3.11092	-4.8562	-4.46816	-7.63758	-7.57908	8.03036e-08
ENSG00000187764	SEMA4D	6.81331	5.31501	5.848	6.23204	26.1262	23.7105	26.5179	23.7089	0.275032	0.143599	0.208401	0.450046	2.03883	2.05583	-4.85656	-4.19741	-6.89539	-6.25325	3.37385e-11
ENSG00000267385	CTB-50L17.14	0.342274	0.23717	0.262444	0.37983	0.822932	1.08697	1.70298	1.99144	0.01	0.01	0.01	0.01	1.72076	2.52409	-4.8566	-5.00512	-6.57736	-7.5292	1.44993e-05
ENSG00000146276	GABRR1	0.272676	0.311757	0.401431	0.363114	0.983396	1.03914	1.52629	1.18987	0.01	0.01	0.01	0.01	1.79105	1.82889	-4.86896	-5.25653	-6.66002	-7.08542	6.84169e-07
ENSG00000163590	PPM1L	9.56064	6.7937	6.90373	8.34731	40.341	37.2375	41.1757	39.3759	0.368097	0.190589	0.373861	0.409587	2.24598	2.40101	-4.87149	-4.28293	-7.11748	-6.68393	6.86432e-13
ENSG00000178248	AP000345.1	0.455679	0.135322	0.119794	0.12384	1.09559	1.62801	0.971671	1.13625	0.01	0.01	0.01	0.01	2.20428	3.11304	-4.88509	-3.60664	-7.08937	-6.71968	5.03033e-05
ENSG00000148204	CRB2	13.2353	7.07194	8.49634	10.3858	79.9831	72.8293	77.9831	77.5991	0.360821	0.320265	0.464792	0.620485	2.91169	3.04258	-4.89802	-4.12089	-7.80971	-7.16347	1.62952e-12
ENSG00000092051	JPH4	2.24816	1.61152	2.01508	1.60382	173.062	162.048	170.968	172.308	0.0863333	0.0425719	0.128319	0.0436655	6.44001	6.56767	-4.9041	-4.3952	-11.3441	-10.9629	6.08843e-15
ENSG00000159409	CELF3	1.32071	1.2764	1.91876	1.82928	521.183	456.758	510.507	529.924	0.01	0.0763446	0.051137	0.0783058	8.5567	8.11683	-4.91066	-4.85575	-13.4674	-12.9726	1.52813e-14
ENSG00000116014	KISS1R	0.979556	1.39994	1.01397	1.51409	12.0702	9.25953	13.2506	12.8998	0.0681802	0.01	0.135117	0.01	3.16414	3.37073	-4.92771	-4.12274	-8.09184	-7.49347	1.62629e-09
ENSG00000132702	HAPLN2	0.275377	0.333927	0.33784	0.0873122	6.67609	7.48813	6.50816	7.66774	0.01	0.01	0.01	0.051703	4.53895	5.05932	-4.92909	-2.78457	-9.46803	-7.84388	1.1789e-09
ENSG00000182132	KCNIP1	0.65784	0.752124	0.453969	0.37544	17.5168	16.5302	14.2788	15.4193	0.01	0.0361256	0.01	0.01	4.5938	5.16215	-4.93395	-5.37401	-9.52775	-10.5362	2.46081e-11
ENSG00000078549	ADCYAP1R1	0.361523	0.250508	0.263343	0.200596	21.9476	19.3922	17.3693	16.4331	0.01	0.01	0.0166225	0.01	6.07778	6.18704	-4.93553	-4.12322	-11.0133	-10.3103	5.9588e-13
ENSG00000185565	LSAMP	10.2883	8.23926	8.51709	8.35174	49.5083	47.1663	49.6839	46.2247	0.110488	0.490345	0.985326	0.424706	2.38346	2.5073	-4.94657	-3.58056	-7.33003	-6.08786	2.43352e-08
ENSG00000230286	AC013472.4	9.07529	2.79488	4.02054	5.11547	61.0147	54.8395	59.7874	43.5829	0.374323	0.01	0.01	0.01	3.2869	3.50011	-4.94888	-8.83542	-8.23578	-12.3355	4.80329e-09
ENSG00000183473	SSTR3	0.273062	0.354771	0.25125	0.389602	2.76288	3.2519	3.14181	3.2626	0.01	0.01	0.0753309	0.01	3.26006	3.321	-4.97231	-2.90885	-8.23237	-6.22985	1.68452e-08
ENSG00000123560	PLP1	8.83341	6.543	8.25235	7.855	28.6838	23.6794	30.4792	28.3981	0.131918	0.353131	0.130716	0.133443	1.76784	1.86999	-4.98644	-5.93017	-6.75428	-7.80016	1.83853e-11
ENSG00000188580	NKAIN2	3.17947	2.57032	2.36826	3.36032	14.6215	14.5748	15.0975	13.7484	0.16861	0.01	0.111382	0.056853	2.3442	2.33212	-5.00862	-5.08962	-7.35282	-7.42174	3.65678e-10
ENSG00000167642	SPINT2	3.54121	3.49562	3.29474	3.51891	19.1688	16.7511	19.3911	20.5461	0.0881267	0.130369	0.240139	0.0891452	2.35179	2.55123	-5.00925	-4.37102	-7.36103	-6.92225	4.08688e-12
ENSG00000100302	RASD2	0.301446	0.34465	0.16642	0.286733	6.70411	8.18503	9.11155	7.77975	0.01	0.01	0.0332645	0.0339585	4.52637	5.22014	-5.01368	-2.75297	-9.54004	-7.97311	6.31237e-11
ENSG00000254902	ANO1-AS1	0.318431	0.330973	0.58599	0.454334	2.10542	3.98182	2.77262	4.16861	0.01	0.01	0.01	0.01	3.2286	2.73816	-5.02104	-5.70089	-8.24964	-8.43905	1.13008e-05
ENSG00000239467	AC007405.6	5.53089	6.19094	6.94855	8.2961	20.9699	22.927	22.8884	25.0634	0.01	0.350459	0.01	0.01	1.90492	1.65328	-5.02322	-9.57409	-6.92814	-11.2274	1.0515e-08
ENSG00000177614	PGBD5	1.1654	0.788753	0.648372	0.850725	31.0825	27.9512	30.543	30.4113	0.0301825	0.0297667	0.01	0.01	4.91692	5.34556	-5.02666	-6.22795	-9.94358	-11.5735	4.2492e-13
ENSG00000150672	DLG2	0.722383	0.677744	0.717618	0.863468	6.14808	4.66687	5.79687	5.41981	0.0142386	0.0280849	0.049381	0.0216048	2.9494	2.82666	-5.04795	-4.47724	-7.99735	-7.3039	4.07822e-12
ENSG00000118160	SLC8A2	1.428	1.29149	1.62109	1.46415	56.0485	52.9619	51.6037	55.5621	0.0413064	0.0407373	0.01	0.104459	5.32499	5.11832	-5.0508	-4.75247	-10.3758	-9.87079	2.44221e-13
ENSG00000129951	LPPR3	61.6892	59.6463	59.2491	61.9744	324.93	310.234	329.197	376.585	0.975373	2.67669	2.68934	1.8875	2.38813	2.54155	-5.05415	-4.72717	-7.44227	-7.26873	1.76777e-11
ENSG00000108551	RASD1	47.1901	39.5081	47.8059	52.3308	249.767	206.366	294.811	312.37	1.44161	1.16325	0.779167	0.530281	2.39538	2.60015	-5.05672	-6.25687	-7.4521	-8.85702	4.45086e-12
ENSG00000124772	CPNE5	1.36565	1.44572	1.27983	1.17871	27.2403	23.3411	29.3182	29.7017	0.0563279	0.0277759	0.223258	0.0284894	4.16927	4.58533	-5.06296	-3.28776	-9.23222	-7.87308	1.67147e-11
ENSG00000197487	GALP	0.219303	0.455881	0.100893	0.3129	7.38183	4.96221	5.72851	7.10894	0.01	0.01	0.01	0.01	4.19239	4.95531	-5.07721	-4.37084	-9.2696	-9.32614	1.93611e-07
ENSG00000235357	RP1-159G19.1	0.01	0.666762	0.393502	0.610187	11.0536	9.67683	9.5753	10.664	0.01	0.01	0.01	0.01	4.93695	4.33377	-5.08058	-5.64917	-10.0175	-9.98294	8.50929e-07
ENSG00000168081	PNOC	0.628924	0.0502842	0.489657	0.276105	21.3443	17.2843	20.4001	18.5174	0.01	0.01	0.01	0.01	5.82967	5.66738	-5.08578	-5.25882	-10.9155	-10.9262	1.78197e-08
ENSG00000271806	RP5-892K4.1	0.637318	0.636941	0.518746	0.769423	5.33362	4.14522	6.00656	3.54509	0.0272981	0.01	0.0270492	0.0276136	2.89505	2.89043	-5.09441	-4.55862	-7.98946	-7.44905	5.88794e-10
ENSG00000271776	RP11-52L5.6	0.353549	0.336851	0.433743	0.476415	1.84176	3.26308	2.93181	2.5713	0.01	0.01	0.0325118	0.01	2.88636	2.59606	-5.10936	-4.42018	-7.99572	-7.01624	1.29565e-08
ENSG00000109851	DBX1	0.343532	0.357061	0.505744	0.849588	1.8997	2.70014	2.39294	2.31284	0.01	0.01	0.0758174	0.01	2.71494	1.79579	-5.1305	-3.98123	-7.84544	-5.77702	1.02359e-06
ENSG00000169862	CTNND2	2.59269	2.10288	2.78548	2.85104	47.4728	43.4411	46.0632	45.4043	0.0500697	0.0822997	0.01	0.0168828	4.27513	4.02038	-5.14866	-7.71198	-9.42379	-11.7324	8.04563e-13
ENSG00000169064	ZBBX	0.362524	0.349888	0.333566	0.172415	1.68098	1.35687	1.997	1.77565	0.01	0.01	0.01	0.01	2.09227	2.89842	-5.15464	-4.66101	-7.24691	-7.55943	3.11087e-07
ENSG00000250543	RP11-442N1.1	0.01	0.704476	0.77955	0.644701	4.27769	5.44841	9.27383	5.704	0.01	0.01	0.01	0.01	3.7669	3.39455	-5.15881	-6.15406	-8.92572	-9.54861	2.34824e-05
ENSG00000164100	NDST3	2.05443	2.01332	2.57893	3.19644	11.4843	10.0137	11.8463	12.2581	0.0653689	0.0483512	0.761083	0.429809	2.4019	2.06131	-5.16067	-2.27787	-7.56257	-4.33918	6.70718e-06
ENSG00000109794	FAM149A	2.20766	1.72096	1.66858	1.74368	11.5399	12.4648	13.9019	14.5486	0.0658544	0.043298	0.0870054	0.0666154	2.61122	3.05966	-5.16961	-4.47328	-7.78083	-7.53294	6.14859e-13
ENSG00000003147	ICA1	1.53512	1.37701	1.4125	1.84025	18.8591	16.7792	21.0045	21.84	0.0702572	0.01	0.162439	0.165828	3.61328	3.71938	-5.1813	-3.30872	-8.79458	-7.02809	1.07778e-10
ENSG00000244239	AC007009.1	0.479503	0.249194	0.01	0.912199	30.2629	17.4167	27.7345	31.685	0.01	0.01	0.264565	0.01	6.03191	6.00971	-5.18725	-1.74793	-11.2192	-7.75764	8.52113e-09
ENSG00000110042	DTX4	10.3836	6.6551	6.46813	7.13771	47.0594	42.1205	43.0459	40.8441	0.113185	0.35348	0.299074	0.190821	2.3879	2.62427	-5.19029	-4.79561	-7.57819	-7.41988	1.07217e-11
ENSG00000139890	REM2	3.8821	3.33931	4.26997	4.79617	33.8483	32.3624	37.7982	42.3924	0.0993863	0.098017	0.196961	0.20107	3.19671	3.14487	-5.19306	-4.50954	-8.38977	-7.65441	1.52952e-12
ENSG00000152092	ASTN1	0.76931	0.509895	0.553975	0.456025	18.9791	15.9865	16.24	15.5132	0.0248331	0.01	0.0369101	0.0376802	4.77262	4.97448	-5.19864	-3.75922	-9.97126	-8.7337	1.5848e-12
ENSG00000152207	CYSLTR2	0.403663	0.335649	0.705694	0.652734	3.88212	3.02856	3.11306	4.32816	0.01	0.01	0.0445442	0.01	3.22457	2.4536	-5.20811	-4.63837	-8.43268	-7.09197	2.17293e-08
ENSG00000232021	LEF1-AS1	0.450077	0.289593	0.197202	0.387338	1.33977	1.04647	0.799771	0.935237	0.01	0.01	0.01	0.0241439	1.68979	1.56957	-5.20881	-4.0976	-6.8986	-5.66717	3.43248e-07
ENSG00000174403	C20orf166-AS1	0.302777	0.440583	1.00293	0.835198	2.80268	3.53366	3.50253	3.96368	0.01	0.01	0.01	0.01	3.09152	2.02214	-5.21599	-6.52209	-8.30751	-8.54423	1.453e-06
ENSG00000170629	DPY19L2P2	1.45617	1.22614	1.47553	1.36756	6.69193	6.60734	5.54851	4.96391	0.01	0.0607337	0.101701	0.0207646	2.3098	1.88656	-5.24493	-4.53701	-7.55473	-6.42357	3.0289e-09
ENSG00000134595	SOX3	0.347142	0.412359	0.182521	0.660399	129.846	130.284	105.36	116.858	0.01	0.01	0.0547245	0.01	8.41996	8.04236	-5.24698	-3.70301	-13.6669	-11.7454	2.08064e-13
ENSG00000061918	GUCY1B3	9.44571	6.7174	6.50568	8.30165	33.9992	30.3918	34.5951	33.6426	0.061516	0.364011	0.76194	0.466702	1.99416	2.20426	-5.24731	-3.59118	-7.24147	-5.79543	3.46413e-09
ENSG00000102678	FGF9	0.362559	0.40039	0.604645	0.150878	5.31194	6.36863	6.0882	6.24362	0.01	0.01	0.0250052	0.01	3.93638	4.02877	-5.25351	-4.43183	-9.1899	-8.4606	2.74887e-09
ENSG00000182674	KCNB2	0.287139	0.477517	0.528405	0.300437	1.79497	1.29943	1.60724	1.75418	0.01	0.01	0.01	0.01	2.01677	2.0199	-5.25674	-5.37303	-7.27351	-7.39293	8.92045e-07
ENSG00000081248	CACNA1S	0.383657	0.381429	0.368358	0.618797	1.48391	1.43029	2.01263	1.66376	0.01	0.01	0.01	0.01	1.9294	1.89694	-5.25755	-5.6252	-7.18695	-7.52215	7.92271e-08
ENSG00000103154	NECAB2	11.673	12.6843	12.4681	11.3362	156.52	136.633	177.639	190.927	0.454535	0.179309	0.180156	0.137936	3.58922	3.95263	-5.26408	-6.22563	-8.85331	-10.1783	3.65654e-13
ENSG00000248692	RP11-84A1.3	0.543048	0.225774	0.599603	0.723161	5.22262	4.13899	5.40387	4.06233	0.01	0.01	0.01	0.01	3.60603	2.83923	-5.26458	-6.04741	-8.87061	-8.88664	5.52722e-07
ENSG00000230269	RP1-40E16.9	0.273364	0.497229	0.01	0.390033	4.84724	4.88325	5.69552	4.34548	0.01	0.01	0.01	0.01	3.65847	4.64964	-5.2679	-4.32205	-8.92637	-8.97169	2.4418e-06
ENSG00000187122	SLIT1	3.73992	3.01817	3.65949	3.62186	57.6053	49.5039	50.1037	47.6987	0.0629148	0.111686	0.0748096	0.140012	3.98632	3.74759	-5.27448	-5.08299	-9.2608	-8.83059	3.54938e-14
ENSG00000204110	RP1-153P14.8	0.766133	0.01	0.176233	0.910925	7.13783	6.15863	9.76798	5.25355	0.01	0.01	0.01	0.01	4.09859	3.7884	-5.27823	-5.76442	-9.37683	-9.55282	1.26026e-05
ENSG00000147869	CER1	0.338612	0.439935	0.701017	0.0805213	7.73421	6.45206	10.6351	8.86559	0.01	0.01	0.01	0.01	4.18757	4.64106	-5.28271	-5.28825	-9.47028	-9.92931	4.13214e-07
ENSG00000075340	ADD2	0.511304	0.269939	0.365914	0.362832	47.7489	44.3057	42.1576	41.2641	0.01	0.01	0.01	0.0182856	6.88057	6.83886	-5.2877	-4.68728	-12.1683	-11.5261	6.40903e-14
ENSG00000166165	CKB	312.067	260.431	228.385	276.858	1336.71	1435.03	1380.36	1524.35	8.54028	6.09476	7.86708	7.20638	2.27545	2.52335	-5.28977	-5.0669	-7.56522	-7.59024	2.00084e-14
ENSG00000223573	TINCR	3.3804	2.75091	2.48348	3.96318	11.2777	9.05009	13.5923	11.9577	0.145914	0.01	0.01	0.01	1.72919	1.98669	-5.29737	-8.33241	-7.02656	-10.3191	1.12577e-08
ENSG00000255994	CCDC177	0.01	0.777485	0.344136	0.711515	13.2638	17.5938	15.585	16.0876	0.01	0.01	0.01	0.01	5.29223	4.90703	-5.29918	-5.72199	-10.5914	-10.629	3.6728e-07
ENSG00000257522	RP11-562L8.1	0.386376	0.401594	0.639922	1.32307	11.705	12.9758	13.8414	12.1394	0.01	0.01	0.0852732	0.01	4.96911	3.72632	-5.30007	-4.36484	-10.2692	-8.09116	3.69103e-09
ENSG00000040608	RTN4R	9.79556	7.74807	8.92805	9.61046	56.2497	56.3468	58.585	64.9429	0.240132	0.202991	0.37391	0.520514	2.68214	2.73624	-5.3071	-4.37342	-7.98924	-7.10966	4.84616e-13
ENSG00000105278	ZFR2	0.224948	0.575527	0.589095	0.658367	2.18418	2.3492	2.75503	3.14977	0.01	0.01	0.0190946	0.01	2.50166	2.24289	-5.32279	-5.4221	-7.82445	-7.66499	3.46575e-08
ENSG00000104967	NOVA2	1.31468	0.77556	1.00261	1.30685	114.59	107.354	106.737	100.266	0.0131901	0.0390251	0.0392096	0.0133425	6.73038	6.48595	-5.32306	-5.45766	-12.0534	-11.9436	1.13214e-14
ENSG00000268191	CTD-2396E7.10	0.79118	0.01	0.181995	0.564423	548.796	538.713	537.088	539.324	0.01	0.01	0.01	0.01	10.4066	10.494	-5.32405	-5.22191	-15.7307	-15.7159	9.19684e-12
ENSG00000138741	TRPC3	0.590026	0.220775	0.260589	0.426534	2.15628	1.82692	2.1724	3.44273	0.01	0.01	0.0520875	0.01	2.29651	3.03068	-5.34128	-3.46819	-7.63779	-6.49887	1.57956e-07
ENSG00000079393	DUSP13	0.175144	0.637147	0.0805767	0.291542	1.36858	2.50295	2.83214	2.83873	0.01	0.01	0.01	0.01	2.25283	3.92974	-5.34393	-4.21769	-7.59676	-8.14743	2.1545e-05
ENSG00000254370	RP11-181B11.1	0.402557	0.418412	1.1112	0.01	3.14558	3.83525	5.00731	3.01137	0.01	0.01	0.01	0.01	3.088	2.83832	-5.35926	-5.8089	-8.44725	-8.64722	0.000178815
ENSG00000138622	HCN4	0.469585	0.591612	0.405888	0.582019	18.4921	14.7094	16.8328	16.6414	0.01	0.0156288	0.01	0.01	4.96749	5.08253	-5.37178	-5.6263	-10.3393	-10.7088	5.46397e-13
ENSG00000196557	CACNA1H	26.0892	21.7992	20.324	21.3909	132.754	126.069	125.931	137.016	0.756058	0.399451	0.775922	0.559939	2.43422	2.65613	-5.37307	-4.96472	-7.8073	-7.62086	1.76644e-13
ENSG00000181965	NEUROG1	0.311866	0.518638	0.459126	0.652618	33.3671	40.8542	36.6198	48.9919	0.01	0.01	0.01	0.01	6.4817	6.26691	-5.37591	-5.79668	-11.8576	-12.0636	2.21182e-10
ENSG00000177551	NHLH2	0.368259	0.467821	0.702784	0.544888	3.09893	3.49224	2.45999	2.90785	0.01	0.01	0.0150509	0.0153649	2.97882	2.1051	-5.38557	-5.35828	-8.36439	-7.46338	2.52416e-09
ENSG00000163624	CDS1	1.66004	1.9411	1.69715	1.49129	6.70752	6.17795	6.48144	6.03659	0.01	0.0759681	0.127212	0.01	1.83922	1.97308	-5.38851	-4.53837	-7.22773	-6.51146	1.68158e-08
ENSG00000229191	RP11-168O16.1	4.7791	4.84543	5.55738	5.85661	27.2105	23.7434	25.6749	24.1993	0.163259	0.064404	0.129417	0.363321	2.40441	2.12749	-5.40174	-4.53384	-7.80615	-6.66133	4.94569e-11
ENSG00000100033	PRODH	0.410382	0.450918	0.507063	0.546493	1.29678	1.70355	1.76474	2.10508	0.01	0.01	0.01	0.01	1.80054	1.877	-5.42844	-5.71912	-7.22898	-7.59612	2.39918e-08
ENSG00000141431	ASXL3	1.84457	1.27815	1.35778	1.82472	5.77525	5.50641	6.12864	5.49897	0.00912982	0.0630282	0.0633262	0.01	1.8531	1.86932	-5.4355	-5.43969	-7.2886	-7.30901	2.33643e-09
ENSG00000135643	KCNMB4	3.05986	3.0049	3.32027	4.09479	28.3365	28.8503	32.1548	32.5716	0.0470015	0.0927079	0.465731	0.0950894	3.23716	3.12583	-5.43995	-3.72485	-8.67711	-6.85067	1.50582e-09
ENSG00000148948	LRRC4C	0.904078	0.959679	0.920356	1.24419	3.4224	3.55072	4.66573	5.44403	0.0214219	0.0211267	0.0424532	0.01	1.90359	2.22361	-5.45296	-5.36689	-7.35655	-7.5905	1.1462e-09
ENSG00000177335	C8orf31	0.772541	1.38694	1.09856	1.77029	4.39028	3.17825	4.8484	5.64774	0.0391064	0.01	0.0774999	0.0791167	1.80933	1.87132	-5.45863	-4.19516	-7.26796	-6.06648	7.72349e-08
ENSG00000260244	RP11-588K22.2	0.353989	0.531455	0.325712	0.336711	6.1941	5.24615	6.31122	5.78648	0.01	0.01	0.01	0.01	3.69157	4.19084	-5.46833	-5.04968	-9.1599	-9.24052	4.78374e-09
ENSG00000177103	DSCAML1	0.438607	0.455881	0.390118	0.347666	10.5279	9.08868	8.69278	10.2442	0.01	0.01	0.01	0.01	4.45487	4.68186	-5.48299	-5.20513	-9.93786	-9.88699	5.38879e-11
ENSG00000130477	UNC13A	4.55008	4.42085	2.99517	3.36147	26.9603	24.9838	24.3502	23.2073	0.130185	0.0691338	0.188536	0.202599	2.53363	2.90334	-5.49211	-4.02252	-8.02574	-6.92586	9.31324e-12
ENSG00000198216	CACNA1E	0.50627	0.394657	0.529351	0.508922	3.3128	3.01459	2.89106	2.69695	0.01	0.01	0.01	0.00648095	2.81213	2.42815	-5.49334	-5.97724	-8.30547	-8.40539	1.23127e-11
ENSG00000070808	CAMK2A	2.8431	3.02461	3.83166	3.86561	39.6671	31.588	36.0511	37.0524	0.0931242	0.0367365	0.0369101	0.0376802	3.60213	3.24752	-5.49776	-6.68922	-9.09989	-9.93674	5.83861e-13
ENSG00000078053	AMPH	6.33252	4.64718	4.75202	5.65892	53.8372	45.8136	50.6889	52.3313	0.101617	0.140304	0.0402763	0.0205583	3.18204	3.30676	-5.50416	-7.41899	-8.6862	-10.7257	5.94271e-13
ENSG00000139044	B4GALNT3	3.26827	2.43843	1.74179	2.32387	11.2228	11.349	12.9406	14.0196	0.0540551	0.0710805	0.0178541	0.0182266	1.98379	2.72927	-5.51109	-6.81612	-7.49489	-9.54539	3.0403e-11
ENSG00000255126	CTD-2531D15.5	11.3313	6.88536	10.2657	8.6226	51.9731	44.8432	45.7536	52.3805	0.38828	0.01	1.73133	2.16022	2.40999	2.37726	-5.51533	-2.27908	-7.92532	-4.65634	2.46876e-07
ENSG00000067840	PDZD4	18.8052	13.665	16.4605	16.5921	190.337	180.391	188.941	197.225	0.39218	0.309421	0.129535	0.052895	3.51317	3.54638	-5.53232	-7.50128	-9.04549	-11.0477	1.60656e-12
ENSG00000228620	RP3-434P1.6	4.6247	5.38366	2.72338	3.51918	17.5683	17.6242	20.9393	12.6851	0.206012	0.01	0.01	0.01	1.81406	2.4293	-5.53395	-8.28599	-7.34801	-10.7153	3.10179e-08
ENSG00000273087	RP11-566J3.4	13.6602	11.3586	17.8924	12.382	38.8324	46.5073	50.7749	55.1007	0.178973	0.353014	0.01	0.01	1.77021	1.8062	-5.55548	-10.5639	-7.32568	-12.3701	1.443e-09
ENSG00000168530	MYL1	0.383209	0.557623	0.705196	0.145802	2.02698	2.09928	2.47865	1.81554	0.01	0.01	0.01	0.01	2.13282	2.33516	-5.55586	-5.41108	-7.68869	-7.74624	2.10557e-05
ENSG00000178947	LINC00086	0.963635	1.08335	1.35713	1.2159	21.1829	18.8065	19.9611	22.4594	0.0219011	0.0215994	0.173612	0.0221542	4.28804	4.04322	-5.55633	-3.71627	-9.84437	-7.75949	5.29535e-11
ENSG00000103355	PRSS33	0.486995	0.455558	0.313665	0.416903	3.33703	3.47978	6.11818	5.22166	0.01	0.01	0.01	0.01	2.85445	3.95624	-5.5585	-5.19095	-8.41295	-9.14719	9.53452e-08
ENSG00000154928	EPHB1	3.10512	2.36677	2.84347	3.06608	16.4422	15.9009	14.8977	14.066	0.0823338	0.0324798	0.01	0.0499712	2.56335	2.29312	-5.57467	-6.62264	-8.13802	-8.91576	1.78716e-11
ENSG00000076826	CAMSAP3	0.891608	0.750205	0.761787	0.525009	51.0915	49.0711	52.1781	48.6735	0.0236414	0.01	0.0468518	0.0478293	5.93091	6.29231	-5.60891	-3.76456	-11.5398	-10.0569	8.58815e-14
ENSG00000256530	AC019294.1	0.654075	0.339918	0.526599	0.311076	1.76917	1.36314	2.13567	2.34451	0.01	0.01	0.0902215	0.01	1.65592	2.41909	-5.63516	-3.0632	-7.29109	-5.48229	3.26238e-06
ENSG00000234690	AC073283.4	0.579129	0.421357	1.17231	1.12927	13.0886	12.4143	13.759	14.152	0.01	0.01	0.0319534	0.0326201	4.67189	3.60014	-5.64456	-5.15554	-10.3164	-8.75567	5.1658e-10
ENSG00000189157	FAM47E	0.53006	0.573424	0.378231	0.617375	3.53719	2.8986	4.22509	4.36979	0.012047	0.01	0.01	0.0243724	2.54405	3.10983	-5.64534	-4.85625	-8.18939	-7.96608	4.2896e-10
ENSG00000134198	TSPAN2	0.723894	0.282152	0.638316	0.516422	19.4352	18.5708	20.71	22.6384	0.01	0.01	0.01	0.101935	5.23946	5.23034	-5.65255	-3.36683	-10.892	-8.59717	9.62111e-11
ENSG00000077274	CAPN6	1.21072	0.898858	1.16705	1.17905	25.8866	29.3175	25.781	18.1498	0.01	0.0316605	0.01	0.01	4.70975	4.2269	-5.66213	-6.87412	-10.3719	-11.101	6.07721e-12
ENSG00000183873	SCN5A	1.35536	0.960505	1.19041	1.17201	3.76479	3.2282	3.52506	3.96852	0.0228697	0.0225546	0.056653	0.0578349	1.59436	1.66539	-5.67194	-4.36699	-7.2663	-6.03239	5.19858e-11
ENSG00000253576	GS1-5L10.1	0.501724	0.521484	0.230823	0.954471	9.34881	11.9501	12.7937	12.5107	0.01	0.01	0.01	0.01	4.37961	4.41607	-5.67695	-5.8891	-10.0566	-10.3052	1.91549e-07
ENSG00000144834	TAGLN3	31.5853	33.665	36.4071	33.649	368.313	348.247	404.311	437.901	0.959319	0.315367	1.07732	1.22918	3.45703	3.5876	-5.67777	-4.92473	-9.1348	-8.51234	6.01262e-13
ENSG00000139220	PPFIA2	0.582423	0.450801	0.399073	0.671867	15.1801	11.3339	12.3621	10.645	0.01	0.01	0.0410236	0.0418794	4.68153	4.42513	-5.69101	-3.69131	-10.3725	-8.11644	3.54482e-11
ENSG00000108231	LGI1	2.05418	2.65949	3.117	2.39956	24.5645	22.4462	29.7652	27.4531	0.01	0.0791623	0.01	0.01	3.31806	3.37464	-5.72428	-8.10762	-9.04234	-11.4823	6.93815e-11
ENSG00000214548	MEG3	0.456575	0.454219	0.540133	0.533557	1.14479	1.52246	1.7849	2.3339	0.01	0.00716371	0.01	0.01	1.55016	1.93965	-5.72969	-5.74643	-7.27985	-7.68608	1.58013e-09
ENSG00000102290	PCDH11X	0.750175	0.311888	0.470994	0.411347	2.63121	2.23872	2.81035	2.58581	0.01	0.01	0.01	0.01	2.19703	2.61253	-5.73072	-5.46326	-7.92776	-8.07579	1.67827e-08
ENSG00000136352	NKX2-1	0.488228	0.575118	0.299485	0.557278	43.1977	46.7083	34.9802	39.566	0.01	0.01	0.01	0.01	6.40174	6.44309	-5.73247	-5.42083	-12.1342	-11.8639	4.78717e-11
ENSG00000086300	SNX10	1.77385	1.78122	1.74281	1.60148	10.0116	10.4192	9.27457	11.1704	0.0334822	0.0330209	0.01	0.101608	2.5228	2.61197	-5.74031	-4.90519	-8.26311	-7.51717	1.26329e-10
ENSG00000139970	RTN1	2.10378	1.84229	2.14912	2.31623	197.666	175.555	207.472	195.666	0.0368957	0.0363874	0.01	0.0559832	6.56347	6.49636	-5.75079	-6.08053	-12.3143	-12.5769	4.60621e-15
ENSG00000103460	TOX3	0.633761	0.446231	0.564325	0.836182	24.6996	23.8354	19.3774	19.7029	0.01	0.01	0.01	0.01	5.48993	4.80242	-5.75488	-6.12981	-11.2448	-10.9322	1.1133e-10
ENSG00000231806	PCAT7	0.530172	0.551053	0.243911	0.504295	2.54939	2.31507	4.17663	2.20334	0.01	0.01	0.01	0.01	2.16961	3.09204	-5.75652	-5.22536	-7.92614	-8.31741	4.25417e-06
ENSG00000182183	FAM159A	0.533131	0.554129	0.566013	0.117026	1.38041	2.14892	1.37731	1.22712	0.01	0.01	0.181018	0.01	1.6987	1.93093	-5.76455	-1.83825	-7.46325	-3.76918	0.000156495
ENSG00000196376	SLC35F1	4.59999	3.32699	2.30157	2.5406	39.4483	36.2012	37.4687	36.1287	0.070822	0.0698462	0.01	0.0716404	3.25449	3.92593	-5.8164	-5.89023	-9.07089	-9.81615	1.64601e-11
ENSG00000162373	BEND5	8.56309	6.50026	8.67583	9.47217	26.8342	20.3956	27.0474	27.2303	0.214299	0.0528366	0.106173	0.108388	1.64866	1.58055	-5.81733	-6.40228	-7.46598	-7.98283	1.924e-11
ENSG00000227487	NCAM1-AS1	0.600979	0.535413	0.552973	0.734975	65.2287	64.8227	65.7838	57.4807	0.01	0.01	0.01	0.01	6.83848	6.58054	-5.82832	-6.00893	-12.6668	-12.5895	7.21316e-12
ENSG00000267448	AC010649.1	0.447188	0.697201	0.411467	0.212681	81.4448	86.008	97.8994	79.4496	0.01	0.01	0.01	0.01	7.19303	8.15049	-5.83843	-4.96382	-13.0315	-13.1143	1.37938e-10
ENSG00000109832	DDX25	0.448896	0.699864	0.413038	0.507047	5.83489	5.34591	4.92064	6.47118	0.01	0.01	0.01	0.0316057	3.28287	3.63009	-5.84393	-4.46691	-9.12681	-8.097	4.04902e-10
ENSG00000260947	RP11-384P7.7	0.641376	0.515128	0.536493	0.720994	3.9603	4.4093	3.80764	4.25267	0.01	0.01	0.01	0.01	2.85539	2.68029	-5.85363	-5.9744	-8.70902	-8.65469	3.49452e-09
ENSG00000119946	CNNM1	0.769836	0.850166	0.265628	0.305109	7.78931	6.5131	6.58336	6.0188	0.017861	0.01	0.01	0.01	3.14219	4.4647	-5.8616	-4.83476	-9.00379	-9.29946	5.43966e-09
ENSG00000198400	NTRK1	1.74728	2.79777	3.78028	4.42451	49.4469	45.1598	52.6314	56.6692	0.0262954	0.0518662	0.0521114	0.01	4.37958	3.73569	-5.86169	-7.04546	-10.2413	-10.7812	1.60899e-10
ENSG00000166206	GABRB3	1.81849	1.02232	1.37857	1.34897	27.4294	23.0457	27.2006	23.4566	0.0382106	0.01	0.0252415	0.01	4.1512	4.21509	-5.88081	-6.27418	-10.032	-10.4893	2.6133e-12
ENSG00000069482	GAL	6.01296	4.52287	2.18394	2.85974	23.8731	24.4034	23.9143	24.4632	0.0881098	0.0868959	0.174613	0.891281	2.19602	3.26179	-5.91176	-2.24241	-8.10778	-5.5042	1.15992e-07
ENSG00000263414	MIR3187	143.995	148.139	120.325	117.4	722.444	677.185	667.098	818.868	0.01	4.84134	8.10704	3.31047	2.26035	2.64404	-5.9121	-4.37997	-8.17244	-7.02401	3.51212e-10
ENSG00000115896	PLCL1	1.89484	2.19879	2.34056	2.88871	10.0945	8.76351	9.99278	9.53061	0.0578134	0.01	0.01	0.01	2.20372	1.90052	-5.91567	-8.03046	-8.11939	-9.93099	6.17993e-10
ENSG00000139915	MDGA2	0.637908	0.572028	0.644496	0.392618	3.23286	2.5025	2.86274	2.43276	0.01	0.01	0.01	0.0281811	2.24495	2.35219	-5.91879	-4.76357	-8.16374	-7.11577	4.02219e-09
ENSG00000255794	RMST	0.676929	0.538039	0.677813	0.492386	3.80558	5.14517	5.25021	6.40427	0.01	0.01	0.01	0.0224287	2.88109	3.31606	-5.92477	-5.17334	-8.80587	-8.4894	3.11443e-10
ENSG00000164929	BAALC	5.89277	4.65382	4.97219	5.23801	33.7496	31.3805	36.7774	39.1729	0.0573144	0.113049	0.0283959	0.17393	2.62655	2.89504	-5.95202	-5.65718	-8.57856	-8.55223	1.11331e-12
ENSG00000150625	GPM6A	1.09574	0.531484	0.927553	0.680942	63.4211	48.5429	50.6113	44.2445	0.0162703	0.01	0.01	0.0329166	6.10448	5.88195	-5.95284	-5.22803	-12.0573	-11.11	1.83433e-12
ENSG00000116176	TPSG1	3.19624	3.15176	3.6196	3.19615	13.1035	14.8352	15.0874	14.9181	0.0912691	0.01	0.271311	0.01	2.13789	2.13828	-5.97004	-4.59863	-8.10793	-6.73691	4.92855e-09
ENSG00000249626	RP11-496H1.1	0.618357	0.642711	0.758616	0.261412	3.22123	2.45467	2.99117	3.59776	0.01	0.01	0.303269	0.01	2.1702	2.69144	-5.9785	-1.70313	-8.14871	-4.39457	1.35982e-05
ENSG00000231671	RP11-157N3.1	0.830802	0.431762	1.07021	0.711228	4.09489	2.17669	6.51051	7.56148	0.01	0.01	0.01	0.01	2.31247	2.98171	-5.98021	-6.4769	-8.29268	-9.45861	1.03415e-05
ENSG00000112394	SLC16A10	0.746583	0.517325	0.330752	0.482197	2.30471	2.42584	2.53374	2.43621	0.01	0.01	0.01	0.0311497	1.90412	2.612	-5.98175	-4.30421	-7.88586	-6.91621	8.95599e-09
ENSG00000119715	ESRRB	0.780718	0.497351	0.324418	0.335374	2.33122	1.97949	1.37836	1.53856	0.01	0.01	0.01	0.01	1.75396	2.14436	-5.99782	-5.04394	-7.75178	-7.1883	1.74823e-06
ENSG00000254740	RP11-334E6.3	0.805339	0.478319	0.846867	0.437733	2.76612	1.50713	1.86038	2.29502	0.01	0.01	0.253912	0.01	1.73507	1.69367	-6.00412	-2.28319	-7.73919	-3.97686	7.68436e-05
ENSG00000185736	ADARB2	0.631777	0.65666	0.780617	0.600942	3.40687	2.66559	2.91888	2.97068	0.01	0.01	0.01	0.01	2.23666	2.09186	-6.00948	-6.11015	-8.24614	-8.20202	6.28273e-09
ENSG00000214167	AC005544.1	0.631971	0.656861	0.581489	0.90169	210.824	187.59	222.857	199.344	0.01	0.01	0.34869	0.01	8.27206	8.1531	-6.00992	-2.04788	-14.282	-10.201	2.52009e-13
ENSG00000145248	SLC10A4	37.5788	32.2504	34.1012	35.4714	113.008	90.9424	106.28	113.907	0.703894	0.378652	0.824291	0.712029	1.54631	1.66214	-6.01133	-5.50097	-7.55765	-7.16311	1.89521e-13
ENSG00000162873	KLHDC8A	0.681148	0.619478	0.757308	0.512923	112.079	107.853	126.348	143.238	0.01	0.01	0.0626372	0.031972	7.40171	7.72951	-6.02306	-3.74697	-13.4248	-11.4765	4.26994e-14
ENSG00000164116	GUCY1A3	0.642164	0.667456	0.574455	0.525986	8.51323	7.83874	8.83087	7.1612	0.01	0.01	0.0787364	0.0803791	3.64224	3.8612	-6.033	-2.78993	-9.67525	-6.65114	8.62123e-10
ENSG00000262619	LINC00621	1.04863	0.272483	0.562839	0.498726	4.93742	3.01798	3.69571	4.46696	0.01	0.01	0.01	0.01	2.59018	2.94285	-6.04561	-5.73005	-8.63579	-8.6729	2.03756e-06
ENSG00000149599	DUSP15	0.678273	0.648588	0.624092	0.903236	6.13173	6.17126	7.82941	7.71233	0.01	0.01	0.029939	0.0611271	3.21292	3.34707	-6.05187	-4.06795	-9.26479	-7.41502	3.33697e-10
ENSG00000206028	CTA-373H7.7	2.20428	1.35011	2.39038	1.34788	125.254	136.739	153.544	149.091	0.01	0.0432318	0.0434361	0.266054	6.20378	6.33907	-6.06117	-3.5944	-12.265	-9.93347	6.59308e-12
ENSG00000100167	SEPT3	11.8451	9.21894	9.20739	10.5279	410.124	392.743	413.443	412.68	0.147743	0.166522	0.104568	0.2989	5.25231	5.38751	-6.06666	-5.61217	-11.319	-10.9997	3.94738e-15
ENSG00000081138	CDH7	0.956262	0.401392	0.541462	0.6647	16.8457	14.3447	16.035	15.3615	0.01	0.01	0.01	0.01	4.52191	4.70211	-6.08497	-5.91428	-10.6069	-10.6164	3.12246e-10
ENSG00000153253	SCN3A	1.27951	0.991973	1.36065	1.28689	35.529	34.1973	37.4665	37.6452	0.01	0.0230375	0.0231464	0.0472587	4.94	4.82632	-6.10338	-5.23282	-11.0434	-10.0591	1.14586e-13
ENSG00000165023	DIRAS2	0.914773	0.48759	1.05752	0.959369	26.5901	24.3859	25.1497	21.8159	0.01	0.01	0.01	0.01	5.18389	4.5414	-6.13172	-6.65599	-11.3156	-11.1974	2.71562e-10
ENSG00000165323	FAT3	1.65773	0.809213	0.930779	0.952137	6.06131	5.89735	4.76963	4.96562	0.00589818	0.0290846	0.01	0.0238654	2.27726	2.37025	-6.13993	-5.79701	-8.41719	-8.16726	8.35221e-10
ENSG00000183837	PNMA3	0.603245	0.855006	0.302759	0.652048	5.60377	5.45336	4.26342	5.77756	0.01	0.01	0.01	0.01	2.92267	3.39455	-6.1881	-5.57714	-9.11076	-8.97168	6.36203e-08
ENSG00000163864	NMNAT3	0.715294	0.743466	0.713002	0.652033	14.7615	13.7005	15.1255	15.3465	0.01	0.01	0.01	0.100724	4.28622	4.48048	-6.1886	-3.6239	-10.4748	-8.10437	8.65239e-11
ENSG00000107518	ATRNL1	16.2835	12.7671	15.4935	15.6282	43.8714	42.8871	48.2075	44.7554	0.244899	0.149515	0.01	0.0589831	1.57843	1.57873	-6.20272	-8.81746	-7.78115	-10.3962	1.77554e-09
ENSG00000165215	CLDN3	0.646368	0.839782	0.74342	1.15279	24.4766	23.1891	24.12	30.0187	0.01	0.01	0.01	0.01	5.0033	4.83547	-6.21544	-6.56697	-11.2187	-11.4024	5.93635e-10
ENSG00000237238	BMS1P10	0.734667	0.763601	0.844976	0.873512	3.31194	2.40602	3.08419	1.94641	0.01	0.01	0.101338	0.01	1.9322	1.54959	-6.22715	-3.94812	-8.15936	-5.49771	8.80863e-07
ENSG00000184144	CNTN2	1.62336	0.870175	1.6252	1.79662	74.612	79.0082	90.5107	99.9373	0.0227403	0.01	0.0112665	0.0230031	5.94503	5.79849	-6.25098	-6.64169	-12.196	-12.4402	6.14821e-13
ENSG00000104888	SLC17A7	2.95919	2.80906	3.46253	2.73341	40.3858	37.0541	49.5108	47.7493	0.0190492	0.0563602	0.0755021	0.0963466	3.74687	3.97245	-6.25725	-5.17211	-10.0041	-9.14457	3.63258e-13
ENSG00000225792	AC004540.4	0.699683	0.848446	0.858389	0.665533	3.08413	4.30514	5.94717	4.5071	0.01	0.01	0.01	0.01	2.25491	2.77823	-6.27438	-6.25164	-8.52929	-9.02988	1.13882e-06
ENSG00000272781	MDGA2	0.835391	0.729366	0.553435	0.476771	3.85639	2.38769	3.0758	2.54136	0.01	0.01	0.01	0.0376434	1.99655	2.44691	-6.28979	-4.43451	-8.28634	-6.88142	2.22017e-08
ENSG00000267909	CCDC177	0.920063	0.65431	0.356449	0.783035	9.54702	8.07361	6.92689	7.06376	0.01	0.01	0.01	0.01	3.48442	3.61801	-6.29863	-5.83224	-9.78305	-9.45025	2.43064e-08
ENSG00000133863	TEX15	0.93479	0.632461	0.551774	0.444583	5.96866	6.4274	6.08804	6.42106	0.00982104	0.01	0.0291945	0.00993453	2.98357	3.65017	-6.30506	-4.67035	-9.28863	-8.32052	7.84046e-11
ENSG00000104369	JPH1	0.963222	0.634881	0.345865	0.178773	3.78449	3.35738	3.06838	3.28055	0.01	0.01	0.01	0.01	2.15994	3.59712	-6.32022	-4.71325	-8.48016	-8.31037	2.37503e-06
ENSG00000251187	CTC-459M5.2	0.881348	0.732848	0.648756	1.08983	11.7606	9.65631	13.594	11.5378	0.01	0.01	0.01	0.01	3.72987	3.85352	-6.33467	-6.44177	-10.0645	-10.2953	5.05443e-09
ENSG00000064655	EYA2	0.96656	0.650053	0.235416	1.00051	53.7233	51.0537	53.1125	54.6183	0.01	0.01	0.0313705	0.01	6.0182	6.4457	-6.33683	-4.90084	-12.355	-11.3465	8.80083e-12
ENSG00000130035	GALNT8	0.923165	0.694828	0.73226	0.484473	10.7535	10.5012	10.8099	11.8272	0.01	0.01	0.01	0.01	3.7155	4.21761	-6.33806	-5.92687	-10.0536	-10.1445	8.00815e-10
ENSG00000010310	GIPR	2.23689	2.50557	3.15724	2.49954	9.52927	8.74177	11.5348	14.865	0.0483711	0.01	0.14379	0.0978602	1.94585	2.22247	-6.34424	-4.54899	-8.29009	-6.77146	3.77197e-09
ENSG00000136750	GAD2	0.920725	0.713391	0.631532	0.573242	21.2918	20.6539	16.7209	16.2589	0.01	0.01	0.01	0.01	4.68194	4.77475	-6.35237	-5.91262	-11.0343	-10.6874	1.14407e-10
ENSG00000261452	RP11-509E16.1	23.4912	20.127	22.1502	22.6466	60.7415	65.5287	68.5751	74.8034	0.353527	0.174328	0.525456	0.238408	1.53351	1.67836	-6.36865	-5.87393	-7.90216	-7.5523	8.13352e-13
ENSG00000138795	LEF1	2.87782	2.41287	2.20662	3.41258	11.2552	12.1323	9.28322	9.5201	0.0427319	0.0210716	0.232883	0.172903	2.14421	1.74255	-6.37368	-3.79157	-8.51789	-5.53413	6.13465e-09
ENSG00000225782	RP11-322F10.2	10.8083	6.70416	9.78454	6.79859	69.5768	61.8669	71.341	65.2039	0.19414	0.01	0.769482	1.37469	2.90799	3.04159	-6.42268	-2.95123	-9.33067	-5.99281	5.42951e-09
ENSG00000225110	LL0XNC01-16G2.1	0.734667	0.981773	0.531128	0.848554	2.8388	2.43727	2.7415	3.86012	0.01	0.01	0.01	0.01	1.62004	2.25848	-6.42328	-6.10819	-8.04332	-8.36668	4.89567e-07
ENSG00000110328	GALNT18	2.35369	1.17898	1.01761	0.728288	4.73855	5.4034	4.09172	3.81839	0.01	0.0311455	0.0938781	0.01	1.5215	2.17973	-6.42388	-4.071	-7.94539	-6.25073	2.93099e-07
ENSG00000117069	ST6GALNAC5	6.63492	5.0656	5.32793	4.54398	51.6568	52.2076	53.0894	53.0324	0.0806071	0.0529977	0.01	0.01	3.15006	3.42625	-6.45246	-8.94719	-9.60251	-12.3734	1.83433e-12
ENSG00000136099	PCDH8	1.25901	0.507414	1.56035	0.95316	12.3553	10.0059	12.5604	11.8208	0.01	0.01	0.01	0.01	3.66209	3.27799	-6.46469	-6.97356	-10.1268	-10.2515	2.33941e-08
ENSG00000158966	CACHD1	12.0682	8.44597	9.74208	9.3058	30.0796	28.6866	30.0027	28.3672	0.179197	0.0530184	0.301858	0.344409	1.51837	1.61559	-6.46501	-4.88136	-7.98338	-6.49695	8.96396e-11
ENSG00000152192	POU4F1	1.04558	0.732382	1.0248	1.31886	5.76557	7.41697	6.44631	8.0483	0.01	0.01	0.0250826	0.0256058	2.89033	2.62868	-6.47408	-5.53096	-9.36441	-8.15965	2.21284e-10
ENSG00000106236	NPTX2	2.14846	2.12674	1.66306	1.00558	10.0852	10.6812	9.12015	9.05634	0.0379784	0.01	0.01	0.0384173	2.28018	2.7679	-6.47747	-5.78444	-8.75765	-8.55234	1.46786e-09
ENSG00000164418	GRIK2	2.01808	2.08329	2.53899	2.14157	9.90221	8.69778	9.37497	9.05446	0.0152887	0.0301561	0.0605972	0.01	2.18112	1.97726	-6.49585	-6.05093	-8.67697	-8.02818	6.93661e-11
ENSG00000183186	C2CD4C	17.0648	16.5291	18.5731	20.1793	68.4481	63.0629	85.4012	91.6847	0.332758	0.0364637	0.476269	0.561006	1.96891	2.19209	-6.50757	-5.22342	-8.47648	-7.41551	2.64314e-10
ENSG00000110076	NRXN2	21.7178	20.0471	21.11	22.4055	98.5425	90.7779	92.1072	95.5334	0.227353	0.224221	0.278919	0.175223	2.18047	2.10837	-6.53118	-6.58224	-8.71165	-8.69061	4.83926e-15
ENSG00000005379	BZRAP1	2.74709	2.79893	3.50878	3.26627	22.4218	20.4362	22.9863	23.0511	0.0301905	0.0297745	0.109689	0.122158	2.95004	2.7645	-6.53119	-4.86899	-9.48123	-7.63349	9.82044e-12
ENSG00000145721	LIX1	1.17561	0.675951	1.47295	1.57028	9.62223	9.05555	5.28921	5.27033	0.01	0.01	0.01	0.01	3.33451	1.79487	-6.5326	-7.24946	-9.86711	-9.04433	2.8757e-07
ENSG00000175175	PPM1E	16.1784	8.58668	10.5153	11.9181	48.912	42.0592	46.4134	42.3156	0.191671	0.0756122	0.113954	0.155109	1.8771	1.98376	-6.53379	-6.38156	-8.4109	-8.36532	3.56283e-12
ENSG00000025039	RRAGD	5.11022	4.23654	3.06004	3.76134	23.8418	21.59	21.8945	20.7319	0.0903334	0.01	0.044755	0.0913773	2.28116	2.64361	-6.54159	-5.64698	-8.82276	-8.29059	2.79627e-11
ENSG00000106069	CHN2	1.12776	0.738765	1.16847	0.793268	9.02306	7.69713	9.56018	7.86917	0.01	0.01	0.052289	0.010676	3.16317	3.15132	-6.54421	-4.96144	-9.70738	-8.11275	4.25764e-10
ENSG00000132437	DDC	0.857386	1.02825	1.33506	1.19194	26.0849	24.7804	33.1429	30.1365	0.01	0.01	0.01	0.01	4.75356	4.64624	-6.55891	-6.98128	-11.3125	-11.6275	1.47367e-10
ENSG00000131409	LRRC4B	24.8812	20.6889	24.8343	24.4505	280.649	256.358	276.656	280.669	0.293605	0.180975	0.18183	0.111374	3.55878	3.49931	-6.58529	-7.39309	-10.1441	-10.8924	5.11649e-15
ENSG00000235280	MCF2L-AS1	0.577828	1.35132	1.46209	0.687032	8.33566	7.5695	7.54683	7.20418	0.01	0.01	0.01	0.01	3.04346	2.77899	-6.59182	-6.74761	-9.63528	-9.5266	9.02578e-07
ENSG00000182836	PLCXD3	1.06432	0.871163	1.27309	1.17689	7.90078	9.98158	10.5249	9.43802	0.01	0.01	0.01	0.0299745	3.20777	3.02648	-6.59655	-5.93754	-9.80432	-8.96402	4.35153e-11
ENSG00000079689	SCGN	5.68643	2.88132	3.40093	2.77206	70.4105	65.6036	72.7656	69.8332	0.01	0.0780681	0.01	0.01	3.9887	4.52985	-6.60415	-8.26982	-10.5928	-12.7997	7.00731e-12
ENSG00000253851	RP11-318M2.3	11.9966	8.25161	8.44107	6.5446	51.3246	53.1553	58.153	60.9278	0.196471	0.01	0.01	0.198742	2.36736	2.99029	-6.61571	-6.16572	-8.98307	-9.15601	1.45899e-10
ENSG00000184613	NELL2	3.84259	2.39636	2.18031	2.57376	111.346	101.896	102.166	102.603	0.0534913	0.01	0.0176679	0.0180365	5.09505	5.42869	-6.6186	-7.05692	-11.7136	-12.4856	8.75825e-14
ENSG00000172247	C1QTNF4	17.4925	16.2541	16.607	18.0498	70.5909	62.2011	70.888	68.5098	0.137672	0.203662	0.272833	0.208894	1.97636	2.008	-6.62741	-6.16878	-8.60377	-8.17678	4.26994e-14
ENSG00000186732	MPPED1	1.89062	1.04682	1.1218	1.00842	27.1464	24.6618	24.2203	24.3868	0.0196775	0.01	0.01	0.01	4.14055	4.5121	-6.62905	-6.73485	-10.7696	-11.247	1.99845e-12
ENSG00000268241	AC018470.1	8.8861	6.75475	8.11526	9.39856	76.1325	80.7901	88.5906	95.4937	0.01	0.145667	0.01	0.01	3.32666	3.3938	-6.65071	-9.77428	-9.97738	-13.1681	2.58755e-12
ENSG00000161610	HCRT	0.534766	1.48221	1.31213	0.508665	78.6446	71.3276	93.3472	104.454	0.01	0.01	0.01	0.01	6.21636	6.76334	-6.65605	-6.50842	-12.8724	-13.2718	1.83789e-09
ENSG00000234685	NUS1P2	1.29598	0.734737	0.650428	0.672394	6.51512	4.63014	4.68955	6.16935	0.01	0.01	0.01	0.01	2.45637	3.03719	-6.66584	-6.04748	-9.12221	-9.08466	4.65275e-07
ENSG00000076864	RAP1GAP	2.14809	1.96779	1.65825	1.76619	30.2439	25.8201	27.9423	27.6442	0.0202731	0.0199937	0.01	0.01	3.7678	4.02079	-6.67547	-7.41972	-10.4433	-11.4405	1.51288e-13
ENSG00000102230	PCYT1B	6.22119	4.36854	5.82646	6.7453	21.9023	19.5584	19.4841	19.4371	0.0412395	0.061007	0.469931	0.292013	1.96908	1.63037	-6.69447	-4.04436	-8.66355	-5.67473	2.52584e-08
ENSG00000197584	KCNMB2	1.06153	1.01388	1.24071	0.982427	3.82836	3.51919	3.99691	4.50698	0.01	0.01	0.0316593	0.0646396	1.82387	1.93552	-6.69725	-4.52894	-8.52112	-6.46446	4.50388e-09
ENSG00000162490	DRAXIN	1.35812	1.30974	1.50729	1.47829	16.8317	15.3902	14.1591	14.1746	0.0155925	0.01	0.0618016	0.0157727	3.59428	3.24643	-6.70382	-5.26629	-10.2981	-8.51272	6.47958e-12
ENSG00000152932	RAB3C	1.26861	0.908597	1.01033	0.872063	40.1515	34.7482	37.1823	33.72	0.01	0.01	0.01	0.0120094	5.10441	5.23519	-6.76633	-6.4183	-11.8707	-11.6535	4.35414e-14
ENSG00000104725	NEFL	37.3829	30.1102	25.0558	29.592	1000.61	841.038	1039.16	1024.4	0.112214	0.498007	0.694946	0.368911	4.77012	5.23883	-6.78926	-5.68279	-11.5594	-10.9216	9.49785e-13
ENSG00000126259	KIRREL2	1.18607	1.07473	1.48308	1.24389	12.4669	13.7989	14.3749	16.9867	0.01	0.01	0.0671192	0.102779	3.53828	3.52363	-6.82069	-4.00455	-10.359	-7.52818	2.3022e-10
ENSG00000153012	LGI2	1.28007	0.98123	0.795024	0.958852	8.09813	7.69839	6.64761	6.1045	0.01	0.01	0.0176569	0.0180253	2.80438	2.86212	-6.82101	-5.6192	-9.62539	-8.48132	4.23662e-11
ENSG00000196482	ESRRG	1.15332	1.11031	1.07859	0.980132	8.22789	7.4979	8.16067	7.43712	0.01	0.01	0.01	0.01	2.79642	2.92152	-6.82249	-6.6856	-9.61892	-9.60713	2.21013e-11
ENSG00000228659	RP1-23K20.2	0.550018	1.71504	0.84347	0.523173	3.30603	4.36678	4.56102	2.74298	0.01	0.01	0.01	0.01	1.76021	2.41805	-6.8234	-6.09449	-8.58361	-8.51254	6.5708e-05
ENSG00000225826	LINC00626	1.4001	0.895533	1.38735	1.22932	51.1414	47.4562	62.1598	64.99	0.01	0.01	0.01	0.01	5.42459	5.60265	-6.84275	-7.03159	-12.2673	-12.6342	9.64651e-11
ENSG00000224717	RP11-576D8.4	1.42604	0.889324	1.0497	0.915598	4.32867	4.62781	4.83366	6.08947	0.01	0.01	0.01	0.01	1.95169	2.47456	-6.8551	-6.61861	-8.80679	-9.09317	1.62048e-08
ENSG00000183715	OPCML	1.53371	1.39661	1.09898	1.62668	10.7362	8.56674	9.16728	8.37635	0.0151152	0.01	0.0748869	0.01	2.71969	2.68627	-6.86635	-5.00492	-9.58605	-7.69119	5.06158e-10
ENSG00000259663	CTD-2314G24.2	1.48125	1.55454	2.44797	2.59904	15.8879	14.5746	17.2443	16.6927	0.01	0.0157948	0.01	0.01	3.32689	2.74936	-6.87884	-7.97929	-10.2057	-10.7286	2.67093e-11
ENSG00000163485	ADORA1	1.5952	0.765241	0.925825	0.653623	3.89435	3.68254	3.08318	3.88589	0.01	0.01	0.108326	0.165879	1.68255	2.14155	-6.88291	-2.52609	-8.56546	-4.66764	1.30231e-06
ENSG00000078725	BRINP1	1.47498	0.930792	1.45409	1.75373	13.077	12.1704	13.8584	14.2191	0.01	0.01	0.01	0.01	3.39156	3.12975	-6.91035	-7.32545	-10.3019	-10.4552	5.85048e-10
ENSG00000188573	FBLL1	1.01567	1.40756	1.12144	0.90169	78.7132	74.4283	90.5411	97.6742	0.01	0.01	0.149439	0.01	5.98179	6.53965	-6.92079	-3.66552	-12.9026	-10.2052	1.44533e-12
ENSG00000066382	MPPED2	1.54318	0.964981	1.39682	1.33659	32.5629	31.4364	31.2897	32.5513	0.01	0.01	0.01	0.0141335	4.67336	4.54571	-6.97048	-6.82352	-11.6438	-11.3692	7.39229e-14
ENSG00000230498	RP4-564M11.2	1.65559	0.860396	0.571252	0.590543	8.95622	9.61175	7.97995	12.1268	0.01	0.01	0.01	0.233132	2.88362	4.11325	-6.97498	-2.25655	-9.8586	-6.3698	1.08897e-07
ENSG00000133134	BEX2	24.9262	24.1807	23.096	21.9626	123.646	124.259	126.849	131.615	0.194801	0.192117	0.01	0.197052	2.33579	2.52009	-6.98776	-7.76567	-9.32354	-10.2858	3.91222e-13
ENSG00000273238	RP11-1263C18.1	1.15782	1.404	1.06534	0.550657	9.74318	7.81351	11.0414	6.49593	0.01	0.01	0.01	0.01	2.77678	3.43994	-7.00102	-6.33628	-9.77781	-9.77622	9.88211e-07
ENSG00000273403	RP11-329B9.3	1.95539	0.60972	0.719676	1.85995	8.22737	4.42448	10.4587	8.04512	0.01	0.01	0.01	0.01	2.30226	2.84259	-7.00287	-7.01102	-9.30513	-9.85361	9.6748e-06
ENSG00000268358	EPB41L4A-AS2	1.79569	0.829519	0.734334	0.948917	14.5113	14.1378	13.774	10.5722	0.01	0.01	0.01	0.01	3.44798	3.85437	-7.03629	-6.39511	-10.4843	-10.2495	3.70058e-08
ENSG00000223259	RNA5SP508	1.72863	0.898355	1.59054	3.28852	12.4685	14.4104	18.2767	15.0864	0.01	0.01	0.01	0.01	3.35499	2.77358	-7.03726	-7.93046	-10.3923	-10.704	8.86419e-06
ENSG00000184672	RALYL	1.35989	1.31922	1.06358	1.40131	30.4073	25.993	30.3067	30.0947	0.01	0.01	0.01	0.01	4.39587	4.61499	-7.06561	-6.94538	-11.4615	-11.5604	3.71349e-12
ENSG00000163393	SLC22A15	2.35171	1.8787	2.02079	2.34785	11.3318	11.6655	12.7163	12.552	0.01	0.0213463	0.0214472	0.0437893	2.4426	2.53207	-7.07636	-6.06536	-9.51896	-8.59744	2.79448e-12
ENSG00000249412	CTC-563A5.2	1.62685	1.12729	1.33058	1.54745	15.4285	18.5132	11.2422	11.4938	0.01	0.01	0.19947	0.407264	3.62339	2.98183	-7.10546	-2.24595	-10.7288	-5.22777	4.07841e-08
ENSG00000100505	TRIM9	3.75998	3.2866	3.11049	3.89365	19.5455	19.5954	19.852	16.9307	0.0384157	0.0126288	0.076131	0.0777193	2.47368	2.39275	-7.10903	-5.50861	-9.58271	-7.90136	1.17234e-12
ENSG00000056487	PHF21B	6.70433	5.72336	5.60948	5.66287	63.252	57.763	63.846	62.256	0.0796403	0.01	0.0394572	0.0402804	3.28356	3.48373	-7.11519	-7.14331	-10.3988	-10.627	1.11517e-13
ENSG00000111913	FAM65B	5.01104	3.31949	3.99599	4.49954	27.7588	26.9102	29.2208	26.9564	0.0148815	0.0440293	0.0294916	0.0301069	2.71424	2.72521	-7.14373	-7.15528	-9.85797	-9.88049	4.76303e-14
ENSG00000173404	INSM1	1.96535	0.870062	1.23906	2.11176	258.754	259.627	280.863	304.931	0.01	0.01	0.0401623	0.0410002	7.51431	7.44974	-7.14742	-5.36756	-14.6617	-12.8173	8.2912e-14
ENSG00000152503	TRIM36	3.60062	3.13035	3.4833	4.35313	47.1686	43.6213	51.2751	51.3105	0.0374751	0.01	0.352768	0.0189541	3.75364	3.71049	-7.1475	-4.3979	-10.9011	-8.10839	5.71759e-09
ENSG00000154639	CXADR	13.1453	10.9592	13.1858	12.7965	58.6956	58.0362	63.011	61.2961	0.017142	0.152152	0.135886	0.312122	2.27582	2.25831	-7.15362	-5.85786	-9.42945	-8.11617	3.97552e-11
ENSG00000206120	EGFEM1P	2.80429	2.08851	3.39297	2.66742	9.39685	10.9919	12.0301	12.2233	0.01	0.0242517	0.01	0.01	2.05904	2.00071	-7.15834	-8.24327	-9.21738	-10.244	6.20519e-11
ENSG00000117016	RIMS3	27.5223	15.2045	17.9072	22.0818	100.796	84.9376	87.584	83.4454	0.142486	0.156136	0.360811	0.256235	2.12002	2.09657	-7.16068	-6.01808	-9.2807	-8.11465	5.38214e-12
ENSG00000101180	HRH3	1.38627	1.48089	2.37391	2.7471	56.7075	53.2418	54.6521	56.1235	0.01	0.01	0.01	0.01	5.26107	4.43507	-7.16348	-8.00028	-12.4246	-12.4354	3.8526e-10
ENSG00000233639	LINC01158	1.82796	1.13997	1.68194	1.15916	22.2679	20.6082	23.1923	25.5253	0.01	0.01	0.01	0.01	3.85264	4.09992	-7.21332	-7.15031	-11.066	-11.2502	1.92148e-09
ENSG00000186648	LRRC16B	2.02066	2.03612	2.32761	2.09811	32.5432	32.9917	36.4738	36.1741	0.017178	0.01	0.01	0.01	4.01386	4.03694	-7.22175	-7.78977	-11.2356	-11.8267	6.74268e-14
ENSG00000253764	RP11-439C15.4	1.79098	1.19669	0.823957	1.33852	5.07501	6.39864	9.07014	8.13427	0.01	0.01	0.01	0.01	1.94123	2.99202	-7.22288	-6.75654	-9.16411	-9.74856	5.62783e-07
ENSG00000183628	DGCR6	3.32289	3.27092	3.66895	3.4396	11.5139	11.0337	11.719	12.648	0.0217679	0.021468	0.150986	0.0440389	1.77379	1.7773	-7.25274	-5.18782	-9.02653	-6.96512	1.3033e-10
ENSG00000130294	KIF1A	1.42332	1.55724	1.63894	1.97931	232.132	204.851	205.049	196.902	0.00926946	0.01	0.01	0.0468829	7.19585	6.79558	-7.27312	-5.99115	-14.469	-12.7867	1.43865e-13
ENSG00000269978	RP11-338N10.3	0.770437	2.40234	1.06334	0.366417	11.5773	9.63391	7.66662	8.64501	0.01	0.01	0.01	0.433957	2.74101	3.51206	-7.3096	-1.68728	-10.0506	-5.19934	5.64132e-06
ENSG00000124507	PACSIN1	4.19097	3.4939	3.79594	4.25633	24.7973	23.6814	30.9796	29.7454	0.0243087	0.0239738	0.144523	0.221307	2.65726	2.91482	-7.31437	-4.46015	-9.97164	-7.37497	4.97174e-11
ENSG00000107831	FGF8	8.35635	6.89966	12.3596	11.6627	23.8466	28.4597	36.137	41.2843	0.01	0.0857742	0.01	0.01	1.77761	1.68835	-7.31552	-10.2302	-9.09313	-11.9185	1.19929e-09
ENSG00000265664	RP11-74H8.1	1.79656	1.40049	2.47958	2.1361	388.215	403.837	453.644	509.018	0.01	0.01	0.01	0.01	7.95271	7.70434	-7.3206	-7.8504	-15.2733	-15.5547	8.4212e-12
ENSG00000273030	RP11-285F16.1	2.10765	1.09533	2.71501	2.80669	7.34779	8.28302	10.4866	8.93436	0.01	0.01	0.232579	0.01	2.28691	1.81443	-7.32327	-4.50859	-9.61018	-6.32302	4.04564e-07
ENSG00000125285	SOX21	6.03812	3.28739	7.02977	7.07182	44.7376	46.7647	48.3339	52.9018	0.0457439	0.01	0.0453269	0.01	3.29455	2.84379	-7.38622	-7.99366	-10.6808	-10.8374	3.10951e-11
ENSG00000170837	GPR27	11.0125	14.1549	9.86208	10.9548	54.8245	52.2089	53.4856	54.6581	0.01	0.138494	0.01	0.0947008	2.08844	2.37713	-7.40501	-7.63534	-9.49344	-10.0125	2.13052e-11
ENSG00000167178	ISLR2	33.1579	28.4169	32.9691	36.9934	164.719	144.235	148.663	151.399	0.262154	0.0923366	0.797849	0.132592	2.32698	2.10061	-7.44045	-6.23252	-9.76743	-8.33313	1.67364e-09
ENSG00000271109	CTC-523E23.11	1.95446	1.52358	2.58511	3.36956	12.7757	9.31027	10.0283	11.1177	0.01	0.01	0.01	0.01	2.66679	1.82829	-7.44213	-8.21788	-10.1089	-10.0462	2.06954e-07
ENSG00000144278	GALNT13	1.86146	1.65603	1.0741	0.975332	11.056	11.4222	11.3612	10.8763	0.01	0.01	0.01	0.01	2.67591	3.4397	-7.4584	-6.67908	-10.1343	-10.1188	2.13114e-09
ENSG00000150510	FAM124A	3.36491	2.24402	2.36235	2.77515	8.7216	7.96822	9.16944	8.80278	0.0216609	0.01	0.0214634	0.0438224	1.57317	1.80663	-7.46888	-6.29815	-9.04205	-8.10478	1.85792e-11
ENSG00000270163	RP11-1085N6.6	1.05259	2.50068	2.3521	2.14547	4.69998	6.8049	6.73351	6.74918	0.01	0.01	0.01	0.01	1.69502	1.58389	-7.47301	-7.813	-9.16803	-9.39689	4.15987e-06
ENSG00000006432	MAP3K9	2.05109	1.40686	1.66567	1.98257	10.0426	8.41575	8.84174	8.61384	0.00924776	0.01	0.0916346	0.224511	2.41628	2.25842	-7.48908	-3.52854	-9.90537	-5.78695	3.02942e-07
ENSG00000144619	CNTN4	2.01651	1.60415	2.05238	2.16455	5.37648	5.70181	6.27773	6.48897	0.01	0.01	0.0124314	0.01	1.61341	1.59812	-7.50011	-7.55453	-9.11352	-9.15265	9.38369e-12
ENSG00000137142	IGFBPL1	1.88204	1.76054	2.07804	2.14822	438.812	395.593	431.333	404.296	0.01	0.01	0.01	0.742054	7.83964	7.62734	-7.50882	-2.49047	-15.3485	-10.1178	4.85916e-12
ENSG00000217236	SP9	9.7457	8.20408	9.3748	11.8748	86.4648	90.2116	99.3338	108.05	0.01	0.0884609	0.01	0.01	3.29907	3.28679	-7.5102	-10.0532	-10.8093	-13.34	8.47723e-13
ENSG00000162989	KCNJ3	4.89294	5.76093	6.61303	5.85146	17.7194	15.2325	20.1274	17.5164	0.01	0.0445972	0.01	0.0228714	1.62898	1.59459	-7.60834	-8.56678	-9.23732	-10.1614	2.45775e-11
ENSG00000168280	KIF5C	43.5908	31.4649	36.8245	40.5826	354.752	299.971	339.245	296.882	0.186329	0.196013	0.209248	0.351834	3.12485	3.03878	-7.61695	-7.10811	-10.7418	-10.1469	2.00084e-14
ENSG00000078018	MAP2	39.1695	32.481	37.1459	38.2903	337.37	301.818	347.252	340.527	0.15855	0.195457	0.785525	0.571363	3.15719	3.18862	-7.66105	-5.79688	-10.8182	-8.9855	5.30108e-10
ENSG00000227640	SOX21-AS1	2.91006	1.13832	1.95782	2.76803	14.9338	12.6699	12.7275	16.1122	0.01	0.01	0.01	0.01	2.76945	2.60941	-7.6612	-7.88443	-10.4306	-10.4938	1.48514e-08
ENSG00000267913	AP001055.1	1.82188	2.23793	1.06677	0.94525	5.575	7.6925	6.38653	9.91184	0.01	0.01	0.01	0.18658	1.70841	3.01801	-7.66527	-3.35545	-9.37368	-6.37346	6.46455e-07
ENSG00000148600	CDHR1	6.99649	6.37383	4.23567	4.69486	23.2947	18.6632	21.5398	19.9738	0.0555224	0.01	0.01	0.01	1.64991	2.21677	-7.67283	-8.8026	-9.32274	-11.0194	1.10567e-10
ENSG00000077279	DCX	4.2099	2.49889	3.43491	5.02724	736.227	658.482	746.396	682.808	0.0225945	0.01	0.0111943	0.159989	7.6997	7.39997	-7.68528	-5.62741	-15.385	-13.0274	1.64761e-11
ENSG00000078114	NEBL	3.65887	3.26526	3.99439	4.15068	18.7569	16.1615	20.07	19.1258	0.0166996	0.0164695	0.198569	0.152034	2.33428	2.2667	-7.70565	-4.53802	-10.0399	-6.80472	1.0192e-08
ENSG00000225889	AC074289.1	1.8449	2.35337	2.12191	1.99416	10.6356	10.636	12.1	15.9966	0.01	0.01	0.01	0.01	2.34106	2.77106	-7.71365	-7.68512	-10.0547	-10.4562	4.19972e-09
ENSG00000165443	PHYHIPL	2.48778	1.72384	2.79773	2.94002	49.2709	46.9543	48.6053	49.2197	0.01	0.01	0.0277299	0.01	4.51397	4.09165	-7.71823	-7.24863	-12.2322	-11.3403	4.20244e-13
ENSG00000255245	FXYD6-FXYD2	84.4318	59.6749	67.7999	78.1206	587.778	561.069	590.036	568.251	0.341919	0.337208	0.508203	0.172935	2.99498	2.98874	-7.72924	-7.74302	-10.7242	-10.7318	8.821e-15
ENSG00000155849	ELMO1	2.20092	2.41894	2.34486	2.20368	8.60848	7.67511	8.30468	8.46843	0.0117275	0.01	0.0464825	0.0355892	1.8175	1.88268	-7.73218	-5.79238	-9.54968	-7.67505	3.08406e-11
ENSG00000068615	REEP1	15.3527	12.2239	13.1668	15.3014	66.6284	54.4827	69.0608	66.2841	0.0860253	0.0424201	0.127862	0.01	2.13481	2.24922	-7.74615	-7.68998	-9.88096	-9.9392	1.60656e-12
ENSG00000133878	DUSP26	1.80974	2.50802	2.12772	2.8212	38.5562	35.4414	39.8317	41.3033	0.01	0.01	0.01	0.01	4.09912	4.03514	-7.75414	-7.95097	-11.8533	-11.9861	1.22698e-10
ENSG00000168135	KCNJ4	7.81984	6.31589	3.62051	5.68523	25.6871	25.7433	30.9154	27.4477	0.0554686	0.01	0.01	0.01	1.86328	2.64887	-7.75433	-8.86198	-9.6176	-11.5108	1.09678e-10
ENSG00000272973	KB-1125A3.11	2.5168	1.91835	1.69822	2.39396	7.86652	6.39417	7.3047	8.15847	0.01	0.01	0.370305	0.01	1.68499	1.91789	-7.79284	-3.42764	-9.47783	-5.34553	4.72545e-07
ENSG00000246528	RP11-159H10.3	2.9805	1.46742	2.06884	2.38739	8.61182	8.28212	9.10581	8.86623	0.01	0.01	0.115403	0.01	1.9253	2.01186	-7.79699	-5.15118	-9.72229	-7.16304	6.35758e-09
ENSG00000099617	EFNA2	28.3171	21.5006	23.1404	28.6698	128.434	123.917	131.519	150.076	0.213799	0.01	0.21185	0.378472	2.34071	2.44231	-7.79831	-6.45559	-10.139	-8.8979	3.40797e-12
ENSG00000272157	CTD-2168K21.2	2.72876	1.74537	2.12451	2.39592	17.916	14.7486	13.577	17.7958	0.01	0.01	0.01	0.01	2.86805	2.79498	-7.80547	-7.82032	-10.6735	-10.6153	3.28524e-08
ENSG00000048540	LMO3	5.76972	4.32073	5.90792	5.50717	34.9575	32.7216	34.5135	31.4092	0.0223106	0.0220032	0.0221072	0.0338527	2.74572	2.52983	-7.83102	-7.67233	-10.5767	-10.2022	2.00084e-14
ENSG00000242828	RP11-47P18.1	2.04175	2.65271	3.05282	0.97105	11.0453	10.334	9.20636	7.31859	0.01	0.01	0.01	0.01	2.18718	2.03799	-7.87482	-7.65244	-10.062	-9.69043	7.13255e-06
ENSG00000235447	RP1-279N11.1	3.00231	1.71127	1.60402	1.56607	16.0669	13.8405	17.7087	15.9387	0.01	0.01	0.01	0.01	2.66561	3.4079	-7.88068	-7.30838	-10.5463	-10.7163	1.2184e-08
ENSG00000182463	TSHZ2	2.29707	2.44702	2.55736	2.58152	13.9251	11.3123	13.5136	13.0252	0.01	0.01	0.01	0.01	2.41136	2.36858	-7.88999	-8.00531	-10.3013	-10.3739	1.1695e-11
ENSG00000188322	SBK1	91.3771	76.0665	81.9735	90.5821	315.083	292.087	294.752	305.456	0.298288	0.407324	0.545666	0.835576	1.85843	1.7984	-7.89058	-6.96495	-9.74901	-8.76335	1.73801e-13
ENSG00000165349	SLC7A3	2.77	1.98233	1.88021	2.20287	8.24304	8.81483	10.3366	8.09603	0.01	0.01	0.01	0.0511552	1.84373	2.17453	-7.89249	-6.06104	-9.73622	-8.23557	2.97002e-10
ENSG00000156687	UNC5D	2.91938	1.89771	2.44993	2.84021	35.4384	31.8678	37.5554	34.8566	0.01	0.01	0.0104936	0.01	3.80451	3.77485	-7.91202	-8.01199	-11.7165	-11.7868	6.45412e-14
ENSG00000227164	AL354993.1	2.4562	2.39338	1.27125	3.6505	13.8409	13.1629	13.9394	12.0579	0.01	0.01	0.01	0.01	2.47723	2.40112	-7.92172	-7.94303	-10.3989	-10.3441	2.2648e-07
ENSG00000186007	LEMD1	1.64488	3.21819	2.93794	3.22123	18.0292	14.5188	22.2656	22.7999	0.01	0.01	0.01	0.01	2.74263	2.87121	-7.92572	-8.26659	-10.6684	-11.1378	5.44517e-08
ENSG00000162433	AK4	2.51094	3.65376	2.36031	2.40129	29.5163	29.1916	31.1147	28.6319	0.0151152	0.01	0.01	0.0152898	3.25145	3.64934	-7.93933	-7.55675	-11.1908	-11.2061	1.93256e-12
ENSG00000085552	IGSF9	9.30652	7.57373	9.34937	8.51239	34.0866	32.4723	35.4628	36.3008	0.0173025	0.0511924	0.171448	0.297542	1.9793	2.00638	-7.94512	-5.25117	-9.92442	-7.25755	4.35219e-10
ENSG00000173320	STOX2	5.58781	4.69512	4.68348	3.93048	31.4533	28.8438	29.4609	26.5906	0.01	0.0309436	0.01	0.01	2.55184	2.70201	-7.9724	-8.75053	-10.5242	-11.4525	3.3669e-12
ENSG00000234921	RP11-85O21.5	3.00948	2.392	3.42063	2.02065	17.4508	20.6607	14.9737	13.4635	0.01	0.01	0.01	0.01	2.8188	2.38576	-8.07721	-8.0878	-10.896	-10.4736	1.22369e-07
ENSG00000204352	C9orf129	2.94121	2.6865	2.0502	2.03466	12.9646	10.4019	12.0841	11.6678	0.01	0.01	0.01	0.01	2.05382	2.53968	-8.13641	-7.67414	-10.1902	-10.2138	9.87834e-09
ENSG00000017373	SRCIN1	5.89599	6.59364	6.78985	7.11676	36.0787	30.4526	34.3717	33.8353	0.0207787	0.0204924	0.0926519	0.0210189	2.4133	2.29415	-8.24138	-6.93477	-10.6547	-9.22891	1.32212e-12
ENSG00000106278	PTPRZ1	20.8984	11.707	10.44	11.562	72.4144	64.1529	57.1374	56.1324	0.080851	0.022782	0.01	0.0233672	2.06643	2.36406	-8.29748	-9.36499	-10.3639	-11.729	1.99355e-10
ENSG00000126217	MCF2L	3.48843	2.78732	2.82232	3.39828	25.5348	24.8946	25.0922	26.8804	0.00987267	0.00973665	0.029348	0.00499338	3.0064	3.06263	-8.32211	-7.50096	-11.3285	-10.5636	3.13583e-14
ENSG00000163531	NFASC	3.09747	1.84041	2.50377	2.61128	30.8737	29.5735	30.9969	31.5563	0.01	0.00529902	0.00532407	0.0163054	3.61371	3.61227	-8.33431	-7.8856	-11.948	-11.4979	9.39267e-14
ENSG00000105251	SHD	3.11012	3.3467	4.34302	3.65439	36.0688	32.5938	42.2359	45.3907	0.01	0.01	0.0403766	0.01	3.41063	3.45376	-8.33468	-7.31064	-11.7453	-10.7644	4.0352e-12
ENSG00000016082	ISL1	9.8184	5.45158	8.73983	8.88288	91.6192	75.0698	91.3777	80.7845	0.0356165	0.01	0.01	0.0360281	3.44839	3.28826	-8.38693	-8.5807	-11.8353	-11.869	8.87882e-13
ENSG00000259485	CTD-2147F2.1	2.80793	3.89136	3.73191	4.55039	21.0035	15.6052	18.1103	21.394	0.01	0.01	0.01	0.01	2.45011	2.25391	-8.38786	-8.69389	-10.838	-10.9478	1.36363e-08
ENSG00000104290	FZD3	23.7227	19.2614	20.625	19.6732	87.8719	83.2778	94.0897	89.5871	0.058228	0.0656294	0.0989094	0.151459	1.99338	2.18838	-8.43898	-7.33052	-10.4324	-9.5189	3.54938e-14
ENSG00000162344	FGF19	4.11918	3.01446	6.96147	5.79723	27.4375	21.4742	33.618	34.1155	0.01	0.01	0.01	0.01	2.77747	2.40839	-8.47849	-9.31727	-11.256	-11.7257	4.57051e-08
ENSG00000233863	AC012215.1	4.06808	3.21776	3.71958	4.79432	53.8873	51.5243	62.027	57.2589	0.01	0.01	0.01	0.01	3.85479	3.80846	-8.50895	-8.73368	-12.3637	-12.5421	5.3951e-12
ENSG00000142538	PTH2	3.80938	3.4936	3.09272	5.96805	115.025	129.427	177.272	163.715	0.01	0.01	0.01	0.01	5.06492	5.23394	-8.51234	-8.82349	-13.5773	-14.0574	5.98246e-10
ENSG00000116141	MARK1	7.14286	4.97599	4.86314	5.28238	40.632	35.0976	37.8736	38.0095	0.0213261	0.01	0.824138	0.711896	2.64361	2.90294	-8.59567	-2.72356	-11.2393	-5.6265	1.24343e-06
ENSG00000107105	ELAVL2	15.9283	13.8102	13.9194	14.8653	75.1255	70.8954	80.6449	77.6392	0.01	0.0659327	0.0441629	0.01	2.29577	2.45914	-8.61339	-9.05378	-10.9092	-11.5129	2.52009e-13
ENSG00000109956	B3GAT1	4.69929	3.15332	3.80206	4.18735	19.7833	18.0436	17.2896	19.7767	0.01	0.01	0.0298027	0.0101415	2.26817	2.21395	-8.61703	-7.64396	-10.8852	-9.85791	1.9844e-12
ENSG00000011347	SYT7	8.32779	6.69835	6.42256	7.69125	83.9743	77.5505	86.1149	82.0286	0.0192412	0.0189761	0.0190658	0.0194635	3.42621	3.57451	-8.61903	-8.51693	-12.0452	-12.0914	2.01e-15
ENSG00000179449	AC124309.1	3.6476	4.63376	4.2678	4.84027	71.2965	70.0929	70.466	69.1141	0.01	0.01	0.01	0.01	4.09366	3.93781	-8.69372	-8.831	-12.7874	-12.7688	1.2463e-11
ENSG00000254585	MAGEL2	3.80785	4.51708	4.26534	4.96056	72.9434	71.2256	70.9958	69.8194	0.01	0.01	0.01	0.01	4.11418	3.93197	-8.70129	-8.84955	-12.8155	-12.7815	6.56674e-12
ENSG00000166407	LMO1	15.8236	17.3324	19.9354	22.4611	59.8474	65.5928	64.6497	68.9734	0.0677768	0.01	0.01	0.06856	1.91966	1.65615	-8.73571	-9.07594	-10.6554	-10.7321	3.60256e-12
ENSG00000165238	WNK2	9.28158	6.86073	4.48161	6.38978	38.2423	34.6453	34.6063	34.1427	0.01	0.0256777	0.00859968	0.01	2.17483	2.6608	-8.82161	-9.19104	-10.9964	-11.8518	1.67112e-11
ENSG00000164434	FABP7	4.44893	4.62416	4.12824	4.08834	45.0527	41.7125	42.0203	35.7721	0.01	0.01	0.01	0.01	3.25745	3.24302	-8.82545	-8.68239	-12.0829	-11.9254	2.69514e-11
ENSG00000226508	AC104655.3	5.91228	4.34398	6.47173	6.01156	18.0138	18.3307	20.6677	21.7325	0.01	0.01	0.01	0.229666	1.82523	1.76407	-9.00229	-5.70283	-10.8275	-7.4669	2.69221e-09
ENSG00000140022	STON2	5.50092	5.20507	5.78457	6.68345	18.5052	15.3592	20.374	20.7096	0.01	0.01	0.01	0.01	1.66135	1.72033	-9.0642	-9.28402	-10.7256	-11.0043	5.06953e-11
ENSG00000101438	SLC32A1	17.7416	11.8367	12.7213	15.2793	187.87	160.082	181.219	169.435	0.0444999	0.01	0.01	0.01	3.55628	3.64652	-9.08407	-10.4512	-12.6403	-14.0978	4.34095e-14
ENSG00000271774	RP4-678D15.1	5.39838	5.75865	3.92144	2.70258	19.6398	14.5497	19.0845	15.5865	0.01	0.01	0.01	0.01	1.6156	2.38795	-9.12374	-8.37156	-10.7393	-10.7595	1.82446e-07
ENSG00000157851	DPYSL5	23.1598	14.9808	13.6495	17.1785	237.143	219.108	217.866	216.109	0.0485419	0.0159577	0.01	0.0982058	3.58043	3.8153	-9.20782	-8.15432	-12.7883	-11.9696	7.75631e-13
ENSG00000261949	GFY	4.60537	7.35109	3.68258	5.1107	33.6796	37.3472	44.8733	44.7043	0.01	0.01	0.01	0.0617625	2.57057	3.34867	-9.22357	-6.93703	-11.7941	-10.2857	1.01706e-10
ENSG00000147642	SYBU	12.8567	12.7238	13.8372	15.5302	57.6156	51.775	57.8848	58.0743	0.0326147	0.01	0.0161587	0.01	2.09637	1.98133	-9.22948	-10.1327	-11.3259	-12.114	1.38552e-13
ENSG00000188176	SMTNL2	5.53826	6.622	5.55563	9.07038	19.573	20.828	20.4077	22.3761	0.01	0.01	0.01	0.01	1.73222	1.54853	-9.24796	-9.51432	-10.9802	-11.0629	2.01336e-09
ENSG00000259153	RP6-65G23.3	6.46425	5.9723	8.06268	6.96857	32.811	31.3064	32.8776	35.1033	0.01	0.01	0.01	0.01	2.36613	2.17716	-9.28037	-9.55375	-11.6465	-11.7309	1.56639e-09
ENSG00000137726	FXYD6	56.9649	41.9914	49.134	52.851	382.88	349.479	390.936	374.714	0.111531	0.0439979	0.176824	0.135384	2.88769	2.90833	-9.31346	-8.35163	-12.2011	-11.26	8.821e-15
ENSG00000271956	DLX6-AS2	6.19598	6.68151	7.12631	8.84036	37.6151	37.8164	45.3751	42.777	0.01	0.01	0.01	0.01	2.55031	2.46493	-9.33064	-9.64085	-11.881	-12.1058	3.59302e-10
ENSG00000254528	RP11-728F11.4	87.2567	69.5169	76.6666	86.2724	601.759	546.595	623.779	617.61	0.156479	0.0771616	0.155053	0.316575	2.87281	2.92955	-9.39018	-8.43247	-12.263	-11.362	3.94738e-15
ENSG00000139737	SLAIN1	7.67638	6.04368	5.04513	6.35565	34.8587	33.925	31.1515	33.5133	0.01	0.01	0.0562849	0.0861888	2.32578	2.50385	-9.42207	-6.32229	-11.7478	-8.82614	8.24971e-12
ENSG00000224243	LINC00403	6.41654	7.45387	7.29315	9.87309	60.3481	61.806	55.6349	63.0584	0.01	0.01	0.01	0.01	3.13862	2.78959	-9.43779	-9.74536	-12.5764	-12.5349	1.084e-09
ENSG00000106689	LHX2	8.32899	6.56323	7.02205	9.17533	44.8477	46.9654	32.3817	31.153	0.01	0.01	0.042749	0.01	2.62414	1.97178	-9.54034	-8.2624	-12.1645	-10.2342	2.13052e-11
ENSG00000141622	RNF165	8.34068	6.88104	6.80421	7.23961	46.7447	40.5577	42.3729	43.1341	0.0100309	0.01	0.0198789	0.0101468	2.51989	2.60611	-9.56969	-8.86952	-12.0896	-11.4756	1.50562e-14
ENSG00000165588	OTX2	21.2369	21.9002	23.7551	25.508	89.6556	92.6844	103.851	107.572	0.01	0.0457347	0.0459508	0.01	2.07963	2.10155	-9.59614	-9.78213	-11.6758	-11.8837	1.82896e-13
ENSG00000184486	POU3F2	18.1713	13.7265	16.372	19.6578	71.8665	67.0219	64.8931	61.4934	0.01	0.0276806	0.0556229	0.01	2.1224	1.81058	-9.72542	-9.10077	-11.8478	-10.9114	5.46397e-13
ENSG00000230316	FEZF1-AS1	22.3527	17.4248	21.4527	23.8603	198.102	194.14	238.148	272.996	0.0345737	0.01	0.01	0.01	3.30172	3.49574	-9.80154	-11.1457	-13.1033	-14.6414	6.87952e-14
ENSG00000226702	AC011306.2	10.3996	7.83964	10.305	12.2835	51.2442	50.6285	56.4343	58.7028	0.01	0.01	0.01	0.01	2.48165	2.34969	-9.83283	-10.1414	-12.3145	-12.4911	3.07328e-10
ENSG00000133083	DCLK1	11.1013	7.87347	11.0134	11.5792	80.0411	73.9741	79.0278	77.0356	0.01	0.01	0.00977678	0.0199615	3.02092	2.78821	-9.88987	-9.56932	-12.9108	-12.3575	7.18068e-14
ENSG00000075043	KCNQ2	43.1938	40.0128	32.4853	37.3947	125.886	113.641	116.442	117.158	0.0284296	0.0560758	0.01	0.01	1.52542	1.74109	-9.94344	-11.7707	-11.4689	-13.5118	9.5239e-14
ENSG00000176840	MIR7-3HG	9.40678	10.9764	18.8621	13.7591	239.29	235.254	305.657	312.343	0.01	0.01	0.01	0.01	4.54109	4.24372	-9.99316	-10.6716	-14.5343	-14.9153	4.93413e-09
ENSG00000055118	KCNH2	14.0275	13.1783	12.9609	14.514	62.5717	62.6144	66.0195	71.9845	0.0163236	0.01	0.01	0.0495368	2.20209	2.32853	-10.0133	-8.85011	-12.2154	-11.1786	1.44598e-13
ENSG00000264913	AL590233.1	11.02	11.454	5.63317	11.6468	47.1031	34.9966	36.5533	56.4842	0.01	0.01	2.70235	1.37936	1.86912	2.42871	-10.134	-2.08186	-12.0032	-4.51057	2.40411e-06
ENSG00000122756	CNTFR	76.4769	56.7705	56.8999	57.7002	370.346	365.359	382.16	422.855	0.01	0.107894	0.01	0.0553326	2.46502	2.81241	-10.1424	-10.7765	-12.6074	-13.5889	4.70334e-14
ENSG00000006377	DLX6	26.3023	22.9368	28.4543	29.6422	119.057	114.533	131.535	131.432	0.01	0.0327529	0.0658154	0.01	2.2461	2.17836	-10.1696	-9.58174	-12.4157	-11.7601	1.43865e-13
ENSG00000204347	BTBD17	13.3909	10.6608	15.9914	17.3444	70.6938	69.8963	68.3274	79.5693	0.01	0.01	0.01	0.01	2.54729	2.14945	-10.2319	-10.7029	-12.7792	-12.8523	2.13667e-10
ENSG00000264919	MIR4697	7.9118	16.4468	6.0665	27.594	34.8744	37.6887	59.0477	41.1008	0.01	0.01	0.01	0.01	1.5748	1.57301	-10.2502	-10.7168	-11.825	-12.2899	7.43259e-05
ENSG00000169783	LINGO1	12.778	12.6052	11.1202	10.9569	106.292	99.0001	98.5754	108.745	0.01	0.01	0.0231535	0.141819	3.01573	3.23125	-10.3097	-7.06417	-13.3254	-10.2954	3.95841e-12
ENSG00000101198	NKAIN4	13.0301	12.4615	17.3454	16.4645	87.7754	93.5649	111.345	133.089	0.01	0.01	0.0425407	0.0868564	2.8306	2.85393	-10.3158	-8.0295	-13.1464	-10.8834	6.71906e-12
ENSG00000172020	GAP43	79.8382	72.8403	75.1839	77.8635	455.717	413.537	448.667	453.644	0.109768	0.01	0.0543836	0.0555182	2.50928	2.55965	-10.316	-10.4435	-12.8253	-13.0032	4.44966e-15
ENSG00000129244	ATP1B2	50.4534	42.2265	46.2787	50.7383	230.231	213.794	241.775	210.201	0.0349642	0.0344825	0.069291	0.106105	2.26031	2.21994	-10.3821	-9.11148	-12.6424	-11.3314	3.94738e-15
ENSG00000186310	NAP1L3	15.0441	11.8287	16.9981	17.0902	81.5246	75.331	82.6571	86.7368	0.01	0.01	0.0430082	0.0439054	2.54522	2.31303	-10.3919	-8.61548	-12.9371	-10.9285	4.76192e-13
ENSG00000231764	DLX6-AS1	17.7039	16.0167	20.318	16.3987	154.027	166.386	188.855	191.137	0.0137729	0.01	0.01	0.0487624	3.24823	3.37146	-10.4701	-9.28733	-13.7183	-12.6588	2.79448e-12
ENSG00000164651	SP8	19.9226	9.79228	12.2576	14.6693	71.273	64.317	63.2966	63.5935	0.01	0.01	0.01	0.01	2.18999	2.23646	-10.537	-10.3948	-12.727	-12.6313	6.45755e-10
ENSG00000175928	LRRN1	22.0469	14.2155	17.4893	18.3552	55.2114	48.4035	53.767	50.4336	0.01	0.01	0.01	0.01	1.51469	1.53954	-10.8243	-10.8075	-12.3389	-12.3471	1.18697e-11
ENSG00000182968	SOX1	34.1008	23.0047	27.8982	30.7456	94.3294	92.5222	99.098	101.045	0.01	0.01	0.01	0.01	1.71019	1.77098	-11.4794	-11.5178	-13.1896	-13.2887	2.29632e-12
ENSG00000128610	FEZF1	32.25	25.621	32.7535	34.9458	184.238	196.066	229.277	262.606	0.01	0.01	0.01	0.0443593	2.71624	2.8611	-11.4986	-10.2824	-14.2149	-13.1435	1.43865e-13
ENSG00000157005	SST	33.4523	29.2343	31.2395	35.3023	355.331	301.86	308.87	309.173	0.01	0.01	0.01	0.01	3.39008	3.21537	-11.6139	-11.7	-15.004	-14.9154	2.3353e-12
ENSG00000105880	DLX5	147.523	117.792	122.904	139.651	499.933	487.367	584.188	628.247	0.0604447	0.01	0.01	0.01	1.89578	2.20722	-11.8789	-13.6803	-13.7747	-15.8875	1.52813e-14
ENSG00000164076	CAMKV	42.2226	33.7434	31.9583	34.0159	159.598	154.115	161.922	163.417	0.01	0.01	0.01	0.0297094	2.04602	2.30197	-11.8911	-10.6982	-13.9372	-13.0002	1.20628e-14
ENSG00000259368	RP11-64K12.4	0.01	0.01	0.01	0.01	20.5221	20.8382	20.1726	21.0177	6.65393	7.73409	3.06117	3.84619	11.014	11.0081	9.49065	8.43199	-1.52338	-2.5761	4.63631e-07
ENSG00000157064	NMNAT2	0.014355	0.0149203	0.0264166	0.109235	69.8731	58.8593	65.2629	54.9448	11.1585	7.23667	4.13442	4.85135	12.1024	9.79141	9.29543	6.04967	-2.80697	-3.74174	3.24562e-09
ENSG00000136531	SCN2A	0.0250089	0.0173293	0.0153408	0.0237883	8.54836	7.3068	8.44063	8.30437	1.40184	3.04889	1.13149	1.61526	8.54878	8.74127	6.71594	6.13334	-1.83284	-2.60793	1.77265e-09
ENSG00000260740	AC026471.6	0.01	0.01	0.01	0.01	3.2088	2.75493	3.5415	2.21859	0.792683	1.17264	0.589093	0.01	8.22007	8.16995	6.61863	4.90471	-1.60144	-3.26524	0.000259943
ENSG00000110436	SLC1A2	0.00834104	0.00866955	0.01	0.01	5.27432	4.57928	5.00085	5.04368	0.380849	1.01687	0.432604	0.432232	9.17807	8.97219	6.3605	5.43435	-2.81757	-3.53784	2.12805e-09
ENSG00000198133	TMEM229B	0.01	0.01	0.0296808	0.01	2.05527	1.84395	2.00622	2.23209	0.413123	0.602289	0.0711925	0.0726777	7.60704	6.7389	5.66592	1.85825	-1.94112	-4.88065	6.18594e-06
ENSG00000171303	KCNK3	0.0166916	0.01	0.0307164	0.0317538	9.77206	6.89767	8.22183	8.59474	0.762131	0.348317	0.792022	0.16923	9.28663	8.0725	5.37861	3.94368	-3.90802	-4.12882	7.51316e-09
ENSG00000197106	SLC6A17	0.01	0.01	0.014244	0.0147251	6.23439	5.16206	4.9873	5.42352	0.603401	0.221032	0.0854144	0.261589	9.15437	8.48935	5.36533	3.58236	-3.78904	-4.90699	9.83022e-09
ENSG00000230432	AC114803.3	0.01	0.01	0.01	0.01	39.7574	29.9328	38.669	35.048	0.368305	0.36323	0.364947	0.01	11.7667	11.8478	5.19285	4.22862	-6.57389	-7.61916	7.19222e-09
ENSG00000197410	DCHS2	0.0141243	0.01	0.0259921	0.0470223	1.56213	1.26155	0.975074	0.889294	0.306727	0.465386	0.132483	0.167069	6.87094	4.67436	5.00025	2.03655	-1.87069	-2.63781	3.2173e-06
ENSG00000179292	TMEM151A	0.0401457	0.01	0.110817	0.0381863	30.2116	27.1081	29.7121	30.6321	0.5365	0.793662	0.354406	0.09045	10.1587	8.66173	4.72933	1.578	-5.42936	-7.08373	2.70301e-10
ENSG00000198944	SOWAHA	0.01	0.01	0.01	0.01	3.25571	2.9417	2.88746	3.15391	0.198859	0.326865	0.01	0.100579	8.27552	8.23873	4.71623	2.467	-3.55929	-5.77173	1.75301e-06
ENSG00000227432	AC053503.11	0.01	0.01	0.01	0.01	4.05005	4.95617	6.90217	6.67115	0.220699	0.217658	0.01	0.446499	8.81478	9.40656	4.45403	4.51254	-4.36074	-4.89402	2.55965e-06
ENSG00000028277	POU2F2	0.577893	0.540588	0.755057	0.626643	57.4947	51.7812	62.811	69.0526	15.5487	8.59389	4.91032	7.62982	6.61029	6.57646	4.43197	3.18204	-2.17832	-3.39442	1.42505e-08
ENSG00000261374	RP11-64K12.10	0.01	0.01	0.01	0.01	7.98965	6.99274	6.6617	6.75765	0.287435	0.141737	0.01	0.0726891	9.54905	9.3901	4.42348	2.0477	-5.12557	-7.3424	8.31095e-08
ENSG00000140323	DISP2	0.298356	0.330781	0.34773	0.397312	20.1573	18.6658	17.1456	18.1775	6.15797	6.88143	3.00702	2.75606	5.9474	5.56715	4.37336	2.95145	-1.57404	-2.6157	2.63812e-08
ENSG00000136274	NACAD	0.920388	0.847928	0.962348	1.05454	124.702	107.492	128.275	123.723	14.9555	21.2053	15.7195	13.3846	7.03681	6.96514	4.35398	3.85102	-2.68283	-3.11412	9.20373e-13
ENSG00000162545	CAMK2N1	1.41595	1.10379	1.77332	1.12237	90.1691	90.0277	95.5978	87.2386	30.6615	19.6986	22.8733	23.705	6.16015	5.9805	4.32093	4.00768	-1.83922	-1.97282	7.95189e-12
ENSG00000136928	GABBR2	0.01	0.01	0.0157545	0.01	2.53178	2.75277	2.12979	2.00666	0.32416	0.0564165	0.01	0.192886	8.04564	7.32743	4.25011	2.97777	-3.79553	-4.34966	6.61613e-07
ENSG00000139973	SYT16	0.0287059	0.01	0.132064	0.0273049	2.10505	1.57255	1.71392	1.86106	0.383621	0.283751	0.221739	0.258703	6.57007	4.48749	4.10786	1.59199	-2.4622	-2.8955	5.12041e-07
ENSG00000162706	CADM3	0.0527995	0.0274395	0.0242909	0.0251112	9.67965	7.26252	8.01246	8.95271	1.0584	0.318945	0.349585	0.267659	7.7221	8.42379	4.10145	3.6432	-3.62065	-4.78059	3.56536e-09
ENSG00000175264	CHST1	0.207008	0.399584	0.299313	0.33755	25.9876	22.3634	25.8595	24.408	6.91604	2.98814	5.31923	5.82997	6.31668	6.3025	4.02924	4.12981	-2.28744	-2.17269	3.42795e-10
ENSG00000182870	GALNT9	0.01	0.01	0.01	0.0211121	3.54874	2.88114	4.41732	4.81502	0.123589	0.170641	0.220433	0.0750107	8.32865	8.21308	3.87888	3.24734	-4.44977	-4.96574	7.533e-10
ENSG00000072832	CRMP1	3.462	3.30461	2.82791	2.90661	456.51	421.925	447.636	458.653	39.1251	58.238	42.121	37.7068	7.02036	7.30416	3.84687	3.79915	-3.17349	-3.50501	5.9588e-13
ENSG00000221890	NPTXR	0.711296	0.443586	0.621753	0.608921	47.0725	40.4906	40.4558	36.5592	8.31742	8.22235	5.65138	5.34861	6.24451	5.96762	3.84012	3.15998	-2.40438	-2.80764	2.58292e-11
ENSG00000225670	CTA-134P22.2	0.0289891	0.0301308	0.0266734	0.0275742	5.5759	4.00469	3.93041	5.09612	0.581107	0.222873	0.127958	0.163284	7.34033	7.37847	3.76544	2.42459	-3.57488	-4.95388	6.98469e-09
ENSG00000168824	NSG1	0.377877	0.392759	0.30423	0.471757	142.81	121.757	131.55	134.86	5.73371	4.69497	9.06946	10.8018	8.42337	8.4234	3.75836	4.67851	-4.665	-3.74489	2.36089e-11
ENSG00000272327	RP11-1002K11.1	0.840763	0.174775	0.825176	0.746412	26.0768	25.8994	28.3064	30.1194	9.67527	3.87835	1.5463	5.0514	5.67753	5.21631	3.73836	2.06974	-1.93917	-3.14657	2.45836e-06
ENSG00000137267	TUBB2A	8.21874	5.32354	5.42507	5.94818	319.531	280.581	318.842	324.113	86.8853	85.2304	94.0454	72.7939	5.46969	5.821	3.66784	3.87474	-1.80185	-1.94626	5.74394e-13
ENSG00000074317	SNCB	0.20789	0.0540193	0.143462	0.296614	21.9301	20.8583	23.4669	21.772	1.85213	1.36996	0.573515	0.819672	7.35201	6.68366	3.62086	1.66256	-3.73115	-5.0211	7.63942e-10
ENSG00000111052	LIN7A	0.635738	0.346121	0.571027	0.460731	27.8589	23.7225	27.7714	23.6276	5.93363	5.91838	1.85406	3.35919	5.71519	5.63856	3.59347	2.33708	-2.12172	-3.30148	9.13496e-08
ENSG00000157168	NRG1	0.550736	0.404887	0.346068	0.536633	22.8979	19.7562	24.0602	21.5873	7.2253	3.58501	2.51989	4.67582	5.4801	5.69247	3.49982	3.02714	-1.98028	-2.66533	1.02998e-08
ENSG00000250986	AC141928.1	0.01	0.0236252	0.0209143	0.01	0.737775	0.460177	0.791652	0.481765	0.177193	0.199716	0.0752477	0.0512117	5.15488	5.36429	3.4866	2.03233	-1.66828	-3.33196	1.02143e-05
ENSG00000174939	ASPHD1	0.177947	0.41615	0.286532	0.211577	30.8579	29.2446	31.2095	30.2837	3.17073	3.46907	3.04365	3.30761	6.66058	6.94782	3.48237	3.67251	-3.17821	-3.27531	3.22852e-12
ENSG00000054356	PTPRN	0.01	0.077645	0.137471	0.0828996	68.6704	57.6337	70.3412	65.3668	0.596216	0.382885	0.384694	0.406746	10.4929	9.26636	3.48171	1.84455	-7.01123	-7.42181	5.34804e-12
ENSG00000205089	CCNI2	0.105563	0.01	0.161884	0.0334702	17.4703	14.4991	14.7501	13.7754	0.626987	0.656996	0.854249	0.396396	8.11187	7.19002	3.47388	2.67851	-4.63799	-4.51151	3.92681e-10
ENSG00000250303	RP11-356J5.12	0.184472	0.191737	0.113157	0.175468	5.96298	6.07803	7.59767	7.64091	1.57502	2.58887	1.69637	1.47777	5.00028	5.72239	3.46832	3.4591	-1.53195	-2.26329	1.22732e-09
ENSG00000041515	MYO16	0.0228715	0.0356585	0.0315668	0.0652657	7.32745	7.46315	6.97009	6.50154	0.254709	0.38936	0.315484	0.322066	7.98129	7.12022	3.45997	2.71897	-4.52132	-4.40124	2.83501e-12
ENSG00000187556	NANOS3	0.208205	0.01	0.0957868	0.0990216	6.25737	5.45494	7.51045	5.58105	1.15934	1.14337	2.06779	1.17274	5.7462	6.07043	3.39957	4.0561	-2.34662	-2.01433	7.43491e-08
ENSG00000144583	MARCH4	1.50337	1.53854	1.93659	2.22198	56.971	44.9243	56.5315	51.4437	22.7952	8.53522	6.45719	18.6554	5.06597	4.69847	3.36452	2.59425	-1.70145	-2.10422	9.23786e-07
ENSG00000166448	TMEM130	0.0882293	0.0687782	0.0608861	0.125885	45.8997	41.635	46.2306	46.2832	0.343898	1.25974	0.535486	0.372721	9.12288	8.95226	3.35244	2.28175	-5.77044	-6.6705	8.95913e-11
ENSG00000222000	AC092675.3	0.01	0.01	0.01	0.0840492	1.2747	1.68369	1.75858	1.54234	0.01	0.194097	0.01	0.298625	7.20867	5.13331	3.35118	1.71437	-3.85748	-3.41894	2.11564e-05
ENSG00000099365	STX1B	1.19818	0.573266	0.559984	0.651257	26.5445	23.6234	26.685	25.4192	9.44639	8.27182	6.3801	8.46288	4.82376	5.42684	3.32223	3.61522	-1.50153	-1.81162	1.49497e-10
ENSG00000089199	CHGB	0.113399	0.0235731	0.125209	0.151011	73.1786	63.2293	72.1072	71.0308	0.631437	0.697466	0.625681	0.485438	9.95982	9.01737	3.27828	2.00813	-6.68155	-7.00925	4.38436e-14
ENSG00000269964	MEI4	0.01	0.01	0.01	0.01	0.437911	0.331739	0.453109	0.507594	0.119315	0.0706029	0.0709366	0.144833	5.26613	5.58602	3.24731	3.43142	-2.01883	-2.1546	5.8129e-06
ENSG00000102109	PCSK1N	0.381787	0.01	0.562063	0.944197	495.225	436.029	459.603	489.899	1.10546	2.51592	4.80284	5.50516	11.2149	9.30006	3.2084	2.77472	-8.00649	-6.52534	4.41399e-10
ENSG00000168490	PHYHIP	0.074084	0.102669	0.22722	0.140936	12.6763	11.4989	12.9933	12.2231	0.852539	0.759426	1.58053	1.08494	7.09565	6.0979	3.18901	2.856	-3.90663	-3.2419	2.59961e-10
ENSG00000008118	CAMK1G	0.345919	0.279645	0.353652	0.292476	13.0299	11.3974	15.7769	13.3218	2.3542	3.12383	2.67205	2.7711	5.2872	5.49299	3.13043	3.07455	-2.15677	-2.41844	2.75915e-11
ENSG00000231092	AC012513.6	0.655952	0.01	0.241422	0.124787	10.5667	6.87434	11.9125	10.3045	4.09081	1.58496	1.59245	3.69472	4.71092	5.92285	3.09133	3.85176	-1.61959	-2.0711	3.33746e-06
ENSG00000172137	CALB2	0.01	0.062774	0.055571	0.0574476	7.26046	8.19945	4.50746	5.49683	0.336297	0.265331	0.53317	0.20411	7.73089	6.46792	3.04738	2.70565	-4.68352	-3.76226	6.56025e-09
ENSG00000260230	FRRS1L	0.288597	0.104335	0.196271	0.119353	12.9272	9.50378	11.0971	9.84011	1.17379	1.99828	1.55079	0.961196	5.83507	6.05172	3.01307	2.99255	-2.822	-3.05917	1.99097e-09
ENSG00000259514	RP11-685G9.2	0.01	0.01	0.01	0.01	15.4965	11.7964	15.3592	22.6694	0.01	0.14903	0.01	0.152858	10.4143	10.8929	2.99123	3.02554	-7.42308	-7.86732	3.5506e-08
ENSG00000115252	PDE1A	0.0491807	0.0170392	0.0452522	0.0311869	1.87222	1.44471	1.30506	0.940195	0.0365135	0.468135	0.343716	0.0923386	5.64644	4.87643	2.92994	2.51213	-2.7165	-2.3643	1.90164e-05
ENSG00000105963	ADAP1	0.284574	0.654947	0.392764	0.29002	26.1464	23.7956	24.753	28.2318	3.48608	3.59433	0.493472	1.44261	5.73219	6.27801	2.91384	1.50364	-2.81835	-4.77437	1.26376e-06
ENSG00000117602	RCAN3	1.07816	1.16667	1.30459	1.7701	42.3456	37.7455	46.5709	44.046	7.33573	8.88923	5.13384	5.37405	5.15696	4.88126	2.85354	1.77296	-2.30343	-3.10831	5.49232e-10
ENSG00000117707	PROX1	0.01	0.01	0.01	0.0337395	0.554337	0.802601	0.544161	0.619134	0.0921714	0.0519437	0.130473	0.173154	6.08421	4.73314	2.84915	2.79529	-3.23506	-1.93785	2.16366e-06
ENSG00000080031	PTPRH	0.0947084	0.369144	0.1525	0.337822	17.7328	14.8317	21.7646	20.6049	1.00199	2.1844	1.28026	0.880201	6.13349	6.43315	2.78018	2.13953	-3.35331	-4.29362	7.62803e-09
ENSG00000174938	SEZ6L2	3.07809	2.08086	2.27959	3.2135	230.083	220.479	230.162	233.505	12.8477	22.373	13.7248	10.8537	6.4485	6.39933	2.77128	2.1617	-3.67723	-4.23762	1.14183e-10
ENSG00000260001	TGFBR3L	0.339226	0.211552	0.249703	0.258135	10.3582	9.29165	9.78935	9.47378	2.04001	1.71384	2.02141	2.21644	5.1569	5.24533	2.76883	3.06089	-2.38807	-2.18444	8.17964e-11
ENSG00000159784	FAM131B	0.479876	0.498775	0.470979	0.410809	27.4982	22.0212	25.2292	24.2708	2.88584	3.51367	4.25399	2.36058	5.66105	5.81085	2.70909	2.90714	-2.95196	-2.90371	2.06531e-11
ENSG00000272512	RP11-54O7.17	0.098613	0.01	0.0907357	0.0937999	6.04595	6.87015	3.5572	5.47117	0.384372	0.324922	1.36024	0.222179	6.89383	5.61249	2.70719	3.10016	-4.18664	-2.51233	1.0622e-06
ENSG00000135439	AGAP2	1.03009	0.868647	1.2697	1.20166	43.2479	39.024	40.6873	48.1485	6.01717	5.61408	6.62719	6.08671	5.43729	5.16777	2.6149	2.36303	-2.82239	-2.80474	6.24317e-13
ENSG00000121905	HPCA	0.206637	0.42955	0.380261	0.245689	13.352	15.6878	14.0081	14.9424	1.78344	2.09929	3.9334	3.14254	5.51244	5.5314	2.60955	3.4988	-2.90289	-2.0326	4.29639e-09
ENSG00000105270	CLIP3	30.0216	26.7261	37.2578	41.81	489.633	503.267	537.287	504.268	140.142	203.827	142.355	103.18	4.12901	3.7195	2.59965	1.63477	-1.52937	-2.08474	2.38898e-08
ENSG00000184545	DUSP8	1.38148	1.598	1.92719	2.37377	153.084	130.555	136.473	130.985	9.40461	7.097	18.1952	8.00724	6.57285	5.95851	2.46947	2.60697	-4.10338	-3.35154	4.58231e-09
ENSG00000171877	FRMD5	0.276794	0.169233	0.269665	0.247797	11.0394	11.5178	12.3744	11.7536	1.48686	0.929897	1.88655	3.02643	5.66032	5.54312	2.43787	3.24708	-3.22245	-2.29604	4.388e-09
ENSG00000178550	AC010170.1	2.98645	5.71149	4.50654	6.70403	74.2448	70.2778	65.9743	77.447	20.7534	25.0595	27.2871	21.2624	4.05448	3.67733	2.39701	2.1146	-1.65747	-1.56273	1.00538e-08
ENSG00000182050	MGAT4C	0.0437395	0.0681932	0.0201228	0.0208023	1.73519	1.11992	2.06744	0.927061	0.316618	0.240197	0.482665	0.172457	4.67285	6.19319	2.31457	4.00071	-2.35828	-2.19248	1.08464e-06
ENSG00000119283	TRIM67	0.033086	0.011463	0.0507384	0.0314712	25.0314	21.0539	23.4583	21.4778	0.0859746	0.133242	0.231232	0.0496961	10.0147	9.09435	2.29889	1.77282	-7.71581	-7.32153	1.83732e-12
ENSG00000159708	LRRC36	0.01	0.01	0.01	0.01	0.769515	1.06724	0.700674	1.46845	0.01	0.0843649	0.0847637	0.173064	6.52101	6.76097	2.23825	3.68834	-4.28276	-3.07264	1.84937e-05
ENSG00000132718	SYT11	11.7967	7.36496	9.12058	10.2688	253.403	199.511	229.505	207.745	46.1231	43.5259	40.2443	39.9784	4.56294	4.49512	2.22606	2.04875	-2.33688	-2.44637	2.79448e-12
ENSG00000168959	GRM5	0.01	0.01	0.01	0.01	0.557026	0.382024	0.443352	0.414758	0.0661561	0.0260979	0.0917743	0.093689	5.55313	5.42309	2.20561	3.21306	-3.34752	-2.21003	1.67218e-06
ENSG00000249992	TMEM158	4.53848	6.36826	5.21993	6.47545	69.2224	74.9928	69.0844	77.6621	21.3544	27.104	25.3541	20.7703	3.72493	3.64931	2.15153	1.97959	-1.57341	-1.66972	4.75214e-10
ENSG00000183578	TNFAIP8L3	0.01	0.0472609	0.01	0.01	0.765269	0.758106	1.69677	1.02043	0.101276	0.14982	0.40141	0.204892	4.73358	7.08598	2.13262	4.92196	-2.60096	-2.16402	1.67084e-05
ENSG00000136546	SCN7A	0.0125569	0.0130514	0.0115538	0.01	0.920813	0.687884	0.718482	0.720154	0.0699199	0.0413739	0.0415695	0.0282912	5.97314	6.06061	2.11969	1.69654	-3.85345	-4.36408	6.72766e-09
ENSG00000153930	ANKFN1	0.0148568	0.0154419	0.01	0.01	0.214321	0.371552	0.240239	0.444551	0.0496357	0.0815865	0.0655777	0.0502094	4.27326	5.09759	2.11469	2.5334	-2.15858	-2.56419	8.1487e-06
ENSG00000133169	BEX1	9.04728	5.93912	3.72415	4.18962	313.121	289.067	325.172	315.54	40.6998	23.665	9.98367	13.5446	5.32849	6.33917	2.10262	1.57196	-3.22587	-4.76721	1.3531e-07
ENSG00000179163	FUCA1	1.80885	0.992272	1.47943	1.43381	23.6781	20.6441	25.4998	20.3596	5.59564	5.79447	4.82383	4.69805	3.98395	3.97653	2.0237	1.70862	-1.96025	-2.2679	4.02361e-10
ENSG00000250349	TM4SF2	2.04844	2.57735	0.793605	0.615304	138.291	127.624	161.329	163.183	7.80427	10.4202	8.09005	6.31557	5.84512	7.84755	1.9781	3.35398	-3.86702	-4.49357	4.21154e-10
ENSG00000135973	GPR45	0.0596251	0.01	0.01	0.01	1.07518	1.42015	1.48332	1.11508	0.199205	0.0654867	0.01	0.134338	5.16348	7.02148	1.92663	2.85138	-3.23685	-4.1701	3.84541e-06
ENSG00000119227	PIGZ	0.768757	0.366224	0.324201	0.243745	12.8998	11.2532	12.5506	15.2955	1.67658	2.533	2.29754	1.94855	4.41146	5.61558	1.89101	2.90231	-2.52045	-2.71327	3.23911e-09
ENSG00000135298	BAI3	0.0469007	0.01	0.0431543	0.0594822	2.27407	2.1597	1.73071	1.11101	0.139283	0.0686819	0.431291	0.281785	6.28394	4.79115	1.86982	2.79651	-4.41412	-1.99464	1.96407e-06
ENSG00000177679	SRRM3	0.0299079	0.0155429	0.0550377	0.0711205	22.8847	21.3882	21.2794	25.5611	0.099921	0.0656962	1.10561	0.16846	9.9279	8.53638	1.86547	3.33614	-8.06243	-5.20024	1.36307e-07
ENSG00000169330	KIAA1024	0.983157	0.597406	0.681946	0.546716	11.419	8.4661	11.7777	10.4096	2.69512	2.99024	2.65386	2.40253	3.65318	4.17458	1.84681	2.04102	-1.80637	-2.13356	7.31304e-10
ENSG00000261439	CTD-2050B12.2	0.01	0.01	0.01	0.01	2.59623	3.665	2.61918	3.50036	0.0601274	0.01	0.0595793	0.0608223	8.2903	8.25728	1.80998	2.58978	-6.48032	-5.6675	9.43756e-08
ENSG00000127585	FBXL16	0.232175	0.402198	0.261101	0.245381	158.131	147.066	155.982	157.567	1.0917	1.105	2.13504	2.6155	8.91019	9.27396	1.79194	3.22951	-7.11826	-6.04446	3.49992e-12
ENSG00000072133	RPS6KA6	0.676198	0.369911	0.65493	0.541638	6.58873	7.03566	6.33043	6.65576	1.86281	1.68079	1.80655	2.0447	3.70309	3.44001	1.76018	1.68643	-1.94291	-1.75358	2.87294e-09
ENSG00000164853	UNCX	0.01	0.01	0.01	0.0477702	46.186	54.9642	48.3511	50.4046	0.01	0.0551585	0.110838	0.0565754	12.3042	10.7393	1.70395	1.53502	-10.6003	-9.2043	4.58744e-13
ENSG00000260500	CTD-3193O13.1	0.203267	0.845092	0.374061	0.01	13.4397	11.6194	13.4005	12.418	2.26369	1.11625	3.14028	3.43478	4.57913	6.07092	1.68886	4.0976	-2.89027	-1.97333	1.15293e-06
ENSG00000159556	ISL2	0.01	0.01	0.01	0.01	18.4828	13.5669	17.6266	24.5383	0.01	0.050862	0.0511025	0.0521686	10.6461	11.0418	1.60554	2.36836	-9.04055	-8.67346	8.63778e-10
ENSG00000112379	KIAA1244	0.297284	0.24432	0.171756	0.230165	14.2204	13.5192	15.1783	14.3862	1.1472	0.463188	0.79343	1.62775	5.67857	6.20081	1.5721	2.59073	-4.10647	-3.61008	2.83144e-09
ENSG00000185634	SHC4	0.271426	0.31738	0.374616	0.29045	4.30302	3.63646	4.72667	4.82227	0.982389	0.763904	1.14191	0.993742	3.75318	3.84377	1.56843	1.68311	-2.18475	-2.16066	1.64501e-09
ENSG00000255082	GRM5-AS1	0.01	0.01	0.01	0.01	0.792436	0.531787	0.63479	0.530223	0.0473611	0.01	0.164253	0.119771	6.049	5.8642	1.52007	3.82794	-4.52893	-2.03626	5.14701e-05
ENSG00000241218	RP11-446H18.1	0.01	0.01	0.207538	0.357578	3.97691	3.67107	5.23717	4.40571	0.25119	0.743188	0.165934	0.254093	8.57893	4.09285	5.63572	-0.428066	-2.94321	-4.52091	4.12012e-06
ENSG00000259714	LINC00594	0.01	0.01	0.01	0.73192	6.47521	3.97094	4.46662	5.11658	0.285643	0.563415	0.01	0.01	9.02876	3.69117	5.40779	-5.21319	-3.62097	-8.90436	4.4352e-05
ENSG00000077264	PAK3	0.0997414	0.0518349	0.119306	0.218209	92.6143	80.3681	87.7145	83.6657	2.47702	3.26449	0.297174	0.337082	10.1564	8.98803	5.24332	0.910117	-4.91305	-8.07792	3.43444e-07
ENSG00000272372	RP11-441F2.5	0.01	0.01	0.173223	0.0596909	3.01759	2.31674	2.0295	2.5819	0.0698857	0.48246	0.01	0.01	8.05916	4.30734	4.7875	-3.54172	-3.27166	-7.84906	2.523e-05
ENSG00000158445	KCNB1	0.0173592	0.00902145	0.0239588	0.016512	16.34	13.851	16.432	13.9272	0.115993	0.371782	0.01	0.00977776	10.1604	9.55104	4.20866	-1.033	-5.95176	-10.584	4.66819e-08
ENSG00000258903	RP11-355I22.2	0.01	0.01	0.01	0.132745	2.34876	2.99157	2.60387	3.13191	0.155418	0.153276	0.308002	0.01	8.06079	5.32847	3.9481	1.15559	-4.11268	-4.17288	1.71142e-06
ENSG00000272678	RP11-797D24.4	0.01	0.01	0.968157	0.01	14.5465	15.3502	12.7609	11.4788	0.01	0.288912	0.01	0.889001	10.5458	4.63116	3.90165	-0.121743	-6.64412	-4.75291	1.90989e-06
ENSG00000168350	DEGS2	0.01	0.01	0.0472242	0.292914	1.11059	1.10019	1.78754	1.59973	0.01	0.281848	0.01	0.115635	6.78841	3.31593	3.86714	-1.43688	-2.92127	-4.75281	0.000305701
ENSG00000084734	GCKR	0.01	0.01	0.0300531	0.0310681	0.39265	0.77795	0.406277	0.855167	0.25462	0.0358732	0.0720855	0.0367947	5.8711	4.36726	3.86043	0.832996	-2.01067	-3.53426	0.000133128
ENSG00000233175	CTD-2020K17.3	0.313988	0.279732	0.825446	0.383995	12.9415	13.5148	14.116	12.3033	4.34593	3.7934	0.494979	1.01061	5.47769	4.44918	3.77706	0.315988	-1.70063	-4.13319	4.68127e-05
ENSG00000105668	UPK1A	0.01	0.01	0.0716407	0.14812	1.404	1.20541	1.54957	1.55318	0.173418	0.0855145	0.171837	0.0877112	7.02758	3.81954	3.69451	0.240071	-3.33307	-3.57947	4.92197e-06
ENSG00000173826	KCNH6	0.01	0.01	0.0224738	0.01	0.939601	0.930806	1.45831	1.55306	0.0272008	0.214609	0.01	0.01	6.54721	6.535	3.5958	-0.699278	-2.95141	-7.23428	5.63159e-06
ENSG00000144119	C1QL2	0.01	0.01	0.01	0.01	0.968345	0.719461	0.814086	0.753212	0.01	0.221174	0.01	0.01	6.39901	6.29214	3.53091	0	-2.8681	-6.29214	0.000260471
ENSG00000180251	SLC9A4	0.01	0.01	0.0211338	0.01	2.40223	2.18827	2.45702	1.77546	0.153474	0.0756797	0.0506916	0.0258746	7.84251	7.08688	3.51824	1.29823	-4.32426	-5.78865	5.94867e-09
ENSG00000229970	AC007128.1	0.111013	0.0576925	0.0510725	0.211189	7.20654	4.62719	6.76621	7.05877	0.556333	1.34119	0.0612513	0.0625291	6.13226	5.72013	3.49154	-1.08322	-2.64072	-6.80335	7.05203e-06
ENSG00000162552	WNT4	0.01	0.01	0.0209051	0.0216111	4.56126	4.95148	4.80434	5.0138	0.0506043	0.149721	0.0250715	0.0511891	8.89372	7.85129	3.32427	0.842926	-5.56944	-7.00837	2.27948e-10
ENSG00000221946	FXYD7	0.01	0.01	0.01	0.16351	23.9025	23.3376	29.5787	32.9337	0.127624	0.0629329	0.01	0.0645496	11.2058	8.49298	3.25215	-1.21874	-7.95364	-9.71173	8.95913e-11
ENSG00000273113	RP11-367H1.1	0.127768	0.01	0.822933	0.60766	3.99352	4.8691	2.8607	4.93822	0.142289	1.12263	0.422976	0.143934	6.00742	2.44666	3.19873	-1.33542	-2.80869	-3.78208	0.000296875
ENSG00000164749	HNF4G	0.021401	0.0222439	0.0590745	0.040713	0.566001	1.01946	0.745366	0.693736	0.143	0.235049	0.01	0.01	5.18295	3.85017	3.11469	-2.31886	-2.06826	-6.16902	0.000198943
ENSG00000135144	DTX1	0.023445	0.01	0.0647167	0.0669022	31.1439	25.1845	26.6839	25.1675	0.130548	0.154499	0.155229	0.01	10.7179	8.62187	3.09134	0.328104	-7.62652	-8.29377	2.27853e-11
ENSG00000164588	HCN1	0.01	0.01	0.01	0.036201	1.87584	1.609	1.70424	1.23371	0.148344	0.0209	0.0629964	0.01	7.44495	5.99074	3.08103	0.659901	-4.36392	-5.33084	2.80038e-07
ENSG00000107295	SH3GL2	0.01	0.0372618	0.0659723	0.0341001	0.560262	1.23812	0.758077	0.983324	0.239546	0.118123	0.0395603	0.121157	5.24988	4.12113	2.91987	0.68348	-2.33	-3.43765	1.94082e-05
ENSG00000253653	CTC-248O19.1	0.225803	0.01	0.415532	0.322173	4.20748	4.70591	3.37045	2.95601	0.880131	0.868005	0.622934	0.763116	5.24032	3.10028	2.89016	0.909864	-2.35016	-2.19042	7.02081e-06
ENSG00000087258	GNAO1	0.303959	0.217883	0.26039	0.348942	112.797	104.114	104.039	101.877	1.01551	2.59014	0.254455	0.472298	8.69928	8.40061	2.78858	0.254237	-5.9107	-8.14637	3.3134e-08
ENSG00000253457	SMIM18	0.01	0.01	0.01	0.01	31.5604	28.4227	34.4934	29.1893	0.01	0.124823	0.01	0.01	11.5503	11.6367	2.75299	0	-8.79735	-11.6367	8.36145e-10
ENSG00000146006	LRRTM2	0.016875	0.052619	0.108689	0.128411	21.7673	20.0965	21.4312	19.4824	0.300686	0.166806	0.186216	0.152081	9.2346	7.43094	2.74998	0.51279	-6.48462	-6.91815	3.08058e-12
ENSG00000117600	LPPR4	0.01	0.01	0.01	0.01	1.47303	1.74667	1.10848	1.04161	0.01	0.122344	0.01	0.01	7.33079	6.74825	2.72622	0	-4.60456	-6.74825	1.21096e-05
ENSG00000120327	PCDHB14	1.0187	0.438132	0.678751	1.13604	16.5959	13.4285	15.6862	14.4526	2.93398	6.443	3.02353	1.46416	4.36523	4.05375	2.68629	1.30617	-1.67894	-2.74758	3.76727e-06
ENSG00000184564	SLITRK6	1.07189	0.618945	1.35885	1.31411	32.1284	31.6291	28.9769	28.48	2.41394	8.13617	2.68107	2.30767	5.23679	4.42597	2.64145	0.900236	-2.59534	-3.52573	1.67504e-06
ENSG00000132692	BCAN	0.041717	0.02168	0.134346	0.119043	1.25376	1.11782	0.985925	0.754167	0.25552	0.137454	0.115087	0.164483	5.22529	2.77974	2.63195	0.141854	-2.59334	-2.63788	5.48525e-06
ENSG00000206140	TMEM191C	0.0478499	0.0248672	0.154097	0.182058	0.97789	0.655322	1.04159	0.984353	0.293084	0.157662	0.0264012	0.01	4.48927	2.5914	2.63195	-3.20707	-1.85733	-5.79846	0.000729855
ENSG00000149557	FEZ1	1.76855	1.60392	1.97826	1.92962	87.8776	82.8633	86.2257	87.5072	8.43816	11.8068	3.94145	2.9494	5.66186	5.47434	2.58569	0.818298	-3.07617	-4.65604	1.5279e-07
ENSG00000232434	C9orf172	2.17568	2.04252	2.55078	2.97072	39.0216	36.7339	40.4631	38.3697	9.0665	15.8019	7.2413	6.83893	4.16665	3.83566	2.55962	1.35054	-1.60703	-2.48513	9.07152e-08
ENSG00000264443	RP4-594I10.3	1.13886	1.18371	1.24437	1.76032	40.0458	41.9596	52.5027	47.0341	6.2622	6.01957	3.37747	3.92904	5.14192	5.04994	2.40272	1.28197	-2.7392	-3.76798	3.69657e-10
ENSG00000130783	CCDC62	0.0459269	0.0716036	0.0422582	0.131056	0.88338	0.957153	0.942601	1.25973	0.255733	0.353093	0.177381	0.232819	3.96902	3.66757	2.37299	1.24294	-1.59602	-2.42463	1.58338e-06
ENSG00000174521	TTC9B	0.0878338	0.0912931	0.202044	0.208867	45.7204	44.1418	46.0507	53.2759	0.391265	0.482342	0.193849	0.44526	8.97059	7.91721	2.286	0.637236	-6.68459	-7.27997	4.1833e-13
ENSG00000088002	SULT2B1	0.036447	0.0378824	0.201213	0.01	0.876298	0.434048	1.04272	0.772496	0.0405892	0.32024	0.0402192	0.0821166	4.13987	3.10337	2.27931	-0.787855	-1.86056	-3.89122	0.00151446
ENSG00000173110	HSPA6	0.01	0.01	0.01	0.036974	2.243	2.8238	4.30324	3.24705	0.01	0.0853852	0.01	0.01	7.98493	7.32852	2.25377	-1.23186	-5.73117	-8.56039	2.0934e-08
ENSG00000163053	SLC16A14	0.208289	0.0432986	0.172486	0.0792494	12.8203	10.1701	8.96438	9.73833	0.417531	0.777804	0.0689542	0.211178	6.51383	6.2152	2.24828	0.154201	-4.26555	-6.06099	1.11619e-07
ENSG00000146151	HMGCLL1	0.214278	0.178174	0.276026	0.183437	8.37184	7.78311	9.1688	8.84283	0.381809	1.45913	0.803948	0.193111	5.36332	5.29284	2.22985	1.11773	-3.13346	-4.17511	4.79411e-07
ENSG00000153789	FAM92B	0.379533	0.0563543	0.299327	0.0515727	7.10457	8.91058	10.7907	11.6945	1.14724	0.833687	0.179492	0.427552	5.19934	6.00177	2.18415	0.790739	-3.01519	-5.21103	2.6823e-07
ENSG00000233006	AC034220.3	0.324118	0.224589	0.298227	0.582341	3.42017	3.9457	3.1805	4.041	1.20318	1.22616	1.19221	0.689681	3.74675	3.03579	2.14646	1.09568	-1.60029	-1.94011	7.85842e-07
ENSG00000230910	RP3-525N10.2	0.01	0.01	0.01	0.099559	2.51653	2.20213	1.34533	1.17447	0.01	0.0766381	0.0770004	0.11791	7.88223	4.52353	2.115	0.831105	-5.76723	-3.69242	1.80294e-06
ENSG00000168348	INSM2	0.01	0.01	0.0314097	0.0324704	13.9937	15.4076	17.4517	17.3646	0.0760323	0.01	0.01	0.01	10.5217	9.09018	2.10488	-1.67537	-8.41679	-10.7655	2.16125e-11
ENSG00000268603	RP11-316O14.1	0.323438	0.336177	1.19041	0.153826	5.83234	6.54811	5.83359	8.87156	0.720395	1.95379	1.42766	1.63962	4.2303	3.45147	2.0194	1.19017	-2.21089	-2.26129	2.2721e-05
ENSG00000268288	RP11-98D18.16	0.01	0.207581	0.551285	0.569903	3.84142	4.75682	5.46526	6.72297	0.222413	0.658046	0.220386	0.449967	5.30442	3.44239	2.0167	-0.742037	-3.28771	-4.18442	6.44026e-06
ENSG00000167554	ZNF610	0.872378	0.876512	0.909717	0.746819	11.7458	9.59266	11.8279	12.4718	2.39643	4.66294	1.444	1.93275	3.60895	3.87469	2.0131	1.02746	-1.59585	-2.84723	7.68625e-07
ENSG00000226087	AC106869.2	0.01	0.157909	0.279579	0.01	5.11385	6.69434	9.44879	4.16714	0.507575	0.166861	0.01	0.01	6.13597	5.5552	2.006	-3.85588	-4.12996	-9.41108	2.16224e-06
ENSG00000132932	ATP8A2	0.268833	0.310467	0.421425	0.464069	19.7258	16.9207	18.8251	19.2414	1.30843	0.973267	0.626275	0.93097	5.98322	5.4259	1.97772	0.814442	-4.0055	-4.61145	3.2127e-11
ENSG00000158806	NPM2	0.01	0.10364	0.183495	0.0474228	5.69381	6.353	6.75962	5.28353	0.166567	0.273787	0.01	0.224656	6.72804	5.70469	1.9542	0.0231719	-4.77384	-5.68152	4.25133e-08
ENSG00000104140	RHOV	0.180974	0.0627004	0.38854	0.286901	3.91605	4.02307	2.10101	2.1059	0.201541	0.728804	0.532545	0.611612	5.02596	2.63886	1.93281	0.760382	-3.09314	-1.87848	1.99404e-05
ENSG00000137078	SIT1	0.01	0.0831292	0.01	0.0760757	4.80737	4.28614	5.17318	4.68664	0.178138	0.175684	0.01	0.01	6.60946	6.83981	1.92572	-2.10561	-4.68374	-8.94542	4.2639e-08
ENSG00000177398	UMODL1	0.01	0.0146887	0.01	0.01	0.288812	0.387088	0.298835	0.422867	0.0472146	0.0465641	0.01	0.0318402	4.77489	5.17333	1.92541	1.06489	-2.84948	-4.10844	3.53729e-06
ENSG00000099812	MISP	0.0358124	0.0372229	0.0659034	0.340645	0.688833	0.767684	0.445462	0.848347	0.119648	0.157332	0.01	0.0403435	4.31778	1.67012	1.92312	-3.01355	-2.39467	-4.68368	0.00256495
ENSG00000171385	KCND3	0.0130807	0.01	0.0361073	0.0124422	3.41232	3.13114	2.96127	1.81025	0.0582692	0.0287332	0.0433035	0.01	8.14722	6.61885	1.91437	0.134773	-6.23285	-6.48407	3.35676e-09
ENSG00000250366	LINC00617	0.01	0.01	0.0272103	0.0281292	8.49664	7.74796	8.64437	6.45228	0.01	0.0649595	0.01	0.01	9.66574	8.0917	1.90611	-1.46831	-7.75963	-9.56001	1.86249e-10
ENSG00000184524	CEND1	0.810851	0.324149	0.860861	1.06792	83.3802	82.5254	83.0929	95.1843	1.80601	2.39767	2.95964	1.96741	7.19153	6.53029	1.88896	1.35303	-5.30257	-5.17725	2.58755e-12
ENSG00000168621	GDNF	0.122649	0.0254959	0.0902813	0.116663	1.35647	0.934802	1.09843	0.856323	0.300494	0.242471	0.0812058	0.138167	3.95107	3.23968	1.87385	0.0841414	-2.07722	-3.15553	8.09609e-06
ENSG00000216901	AL022393.7	0.01	0.439032	0.777309	0.40178	3.80839	4.02425	6.30489	2.89646	0.940803	0.695881	0.01	0.237919	4.12461	2.96417	1.86589	-2.24973	-2.25872	-5.21391	0.0003481
ENSG00000154153	FAM134B	0.562901	0.16382	0.455784	0.492593	19.3264	17.7511	22.1537	22.5421	1.52958	1.11283	0.124232	0.355107	5.673	5.55853	1.86238	-0.984413	-3.81062	-6.54295	6.04928e-07
ENSG00000253476	RP11-395I14.2	0.584394	0.60741	1.25466	1.11174	16.1582	18.0949	18.1728	19.4295	2.60324	1.71158	2.14959	0.877776	4.84501	3.99005	1.85616	0.355369	-2.98886	-3.63468	3.2167e-08
ENSG00000140450	ARRDC4	10.2404	8.35919	6.87143	9.07536	125.958	122.31	134.306	119.266	28.2602	38.4047	14.8833	8.13147	3.73855	3.99106	1.84166	0.529291	-1.8969	-3.46176	9.24835e-06
ENSG00000177453	NIM1K	0.227363	0.0590794	0.235351	0.162199	4.81736	3.51997	4.77244	5.20875	0.727959	0.280929	0.156809	0.288145	4.86327	4.65	1.81645	0.16252	-3.04682	-4.48748	1.23298e-07
ENSG00000100628	ASB2	0.01	0.01	0.0563317	0.0582341	0.466124	0.243032	0.304611	0.30532	0.0227267	0.0448272	0.0225196	0.0689681	5.14803	2.41247	1.75604	-0.324528	-3.39199	-2.737	0.000284561
ENSG00000100060	MFNG	0.371922	0.351427	0.186661	0.514574	28.0458	27.7028	29.2295	30.3092	1.61911	0.81697	0.671589	0.914134	6.2681	6.40778	1.7518	1.17717	-4.5163	-5.23061	4.29286e-11
ENSG00000132832	RP11-445H22.3	0.145273	0.528481	0.334171	0.276365	10.915	12.0239	12.9202	11.4107	0.808918	1.43599	0.961852	0.01	5.08943	5.31656	1.73636	0.670659	-3.35307	-4.64591	1.11936e-06
ENSG00000173452	TMEM196	0.01	0.01	0.01	0.0239377	5.29434	5.57446	4.78941	4.29853	0.0560522	0.01	0.01	0.01	9.08598	8.06492	1.72361	-0.762888	-7.36237	-8.82781	4.25034e-10
ENSG00000232344	AC087163.2	0.241157	0.125327	0.01	0.458773	3.33394	1.72316	2.54973	2.706	0.402847	0.794593	0.266116	0.271668	3.78649	3.48693	1.70813	0.198139	-2.07836	-3.28879	0.000101963
ENSG00000068971	PPP2R5B	9.23121	9.62644	10.0356	10.8671	136.538	120.529	143.777	152.886	26.8714	34.6991	19.9026	21.2445	3.76892	3.82706	1.70709	0.977097	-2.06183	-2.84996	1.24535e-09
ENSG00000197181	PIWIL2	0.0178844	0.0185888	0.0329116	0.01	0.730995	1.15012	0.511658	0.713528	0.039834	0.0785704	0.0394709	0.0201472	5.68861	4.83549	1.69881	0.474382	-3.9898	-4.36111	4.79331e-07
ENSG00000244124	ATP1B3-AS1	0.01	0.28432	1.00678	0.52039	3.94614	6.8411	6.80514	5.79783	0.913905	0.01	2.41486	0.308156	5.1958	3.04483	1.65036	0.834346	-3.54544	-2.21049	0.00089523
ENSG00000101210	EEF1A2	1.22777	0.812077	1.59184	1.85793	1065.38	988.28	1087.22	1091.28	3.79116	2.57434	5.41936	3.7721	9.97552	9.30262	1.64182	1.41379	-8.33371	-7.88882	8.9688e-14
ENSG00000129990	SYT5	0.0577071	0.0799732	0.0353983	0.0731875	30.8247	30.33	33.0908	35.3982	0.257062	0.169014	0.0636798	0.01	8.795	9.30089	1.62979	-0.559494	-7.16521	-9.86039	3.10951e-11
ENSG00000176054	RPL23P2	0.732922	0.507858	1.34875	1.3943	6.46129	4.36419	6.98941	7.91946	2.17658	1.60995	1.88715	1.6513	3.12511	2.44232	1.60963	0.367338	-1.51548	-2.07498	4.65649e-05
ENSG00000259953	RP11-4O1.2	0.744389	0.950554	1.07631	1.0722	9.79245	8.83962	10.6349	10.7127	2.51066	2.5695	2.06532	2.46779	3.45848	3.31267	1.58364	1.07716	-1.87484	-2.2355	1.29294e-09
ENSG00000269975	RP11-58B17.2	0.01	0.0884237	0.01	0.242763	21.4769	20.1614	20.8466	23.2286	0.284225	0.01	0.0938781	0.01	8.72469	7.44604	1.57984	-1.28289	-7.14485	-8.72893	1.16654e-09
ENSG00000259796	RP11-355I22.7	0.306842	0.0637853	0.338797	0.466985	6.861	8.55079	8.85481	6.19748	0.751772	0.337007	0.27088	0.622195	5.37792	4.22345	1.55467	0.148391	-3.82325	-4.07506	3.81124e-08
ENSG00000128917	DLL4	0.0871638	0.0452984	0.0200503	0.0621822	1.96471	2.17988	1.40947	2.2278	0.242675	0.143599	0.0240463	0.0736439	4.96757	5.467	1.54404	0.248506	-3.42353	-5.2185	1.64341e-07
ENSG00000053918	KCNQ1	0.0518022	0.0269212	0.0476642	0.0492739	0.311371	0.64776	0.612137	0.387513	0.115379	0.11379	0.0857456	0.116713	3.60686	3.36629	1.54155	1.06249	-2.06532	-2.3038	1.63655e-05
ENSG00000272582	RP5-1039K5.17	0.505422	0.262664	0.813835	0.961507	2.73418	3.9124	3.45775	6.93159	1.12573	1.11022	0.976032	1.70811	3.11327	2.54894	1.54155	0.596362	-1.57173	-1.95257	0.000215823
ENSG00000168453	HR	0.01	0.0121703	0.064643	0.0111377	0.281525	0.292834	0.349554	0.437959	0.0130399	0.0514411	0.0646053	0.0131906	4.69525	3.3774	1.54024	0.0378649	-3.15501	-3.33954	7.11437e-05
ENSG00000163794	UCN	0.776252	0.403412	1.07137	2.33815	5.75458	4.46812	6.75892	4.19383	1.15263	2.2735	0.428297	1.02021	3.11533	1.68365	1.53821	-1.235	-1.57712	-2.91866	0.00219295
ENSG00000042781	USH2A	0.0149903	0.0311613	0.00459762	0.0190115	0.276316	0.303483	0.279691	0.249192	0.105728	0.0274399	0.0110278	0.0112579	3.6511	4.48553	1.5288	-0.0832234	-2.1223	-4.56875	6.31405e-05
ENSG00000146530	VWDE	0.0792521	0.049424	0.218764	0.0150768	4.21108	5.24761	5.3233	4.01165	0.158866	0.208904	0.349818	0.21427	6.19982	5.31904	1.51506	1.27039	-4.68476	-4.04865	3.38886e-08
ENSG00000143502	SUSD4	0.01	0.01	0.01	0.0201096	1.55034	1.05745	1.26227	1.29157	0.0470885	0.01	0.01	0.071449	7.02668	6.4063	1.5132	1.43567	-5.51348	-4.97063	7.15545e-08
ENSG00000246379	RP11-461O7.1	0.01	0.01	0.0235358	0.01	0.891749	0.792015	1.14542	0.478367	0.0284861	0.0280937	0.0846794	0.01	6.39555	5.59752	1.50029	1.49735	-4.89526	-4.10017	1.25811e-06
ENSG00000107281	NPDC1	21.6078	18.8264	12.7589	14.977	282.257	305.572	294.437	328.855	51.3496	61.8685	43.2514	44.7887	3.86175	4.49008	1.48546	1.6664	-2.37629	-2.82368	2.2308e-10
ENSG00000113742	CPEB4	4.0853	3.29913	3.70368	3.99067	31.2725	30.3359	32.3454	30.4856	9.66789	10.7334	12.4084	9.31714	3.06057	3.0296	1.4661	1.49752	-1.59447	-1.53209	4.04125e-11
ENSG00000166816	LDHD	0.218002	0.543811	0.401176	1.07828	5.39868	4.41352	5.47758	5.70776	0.679779	1.38871	1.05849	0.491168	3.68707	2.91847	1.44107	0.0668781	-2.246	-2.85159	1.22598e-05
ENSG00000133101	CCNA1	0.04468	0.01	0.328887	0.212496	22.2369	20.8049	25.2872	26.1816	0.0497579	0.0981448	0.295826	0.150999	9.62051	6.5709	1.43556	-0.276942	-8.18495	-6.84785	6.99886e-10
ENSG00000273301	RP11-314B1.2	0.01	0.01	0.01	0.01	2.7899	3.26413	3.43421	3.79141	0.01	0.0439466	0.01	0.0450755	8.24175	8.49698	1.43153	1.46141	-6.81022	-7.03557	2.13829e-08
ENSG00000105784	RUNDC3B	0.0436745	0.0907891	0.0602786	0.124628	9.31936	7.54174	8.63776	9.1207	0.194552	0.167888	0.0481947	0.0492002	6.97034	6.58556	1.43053	-0.924881	-5.53981	-7.51044	1.04064e-10
ENSG00000188888	GPR179	0.0125753	0.0392117	0.0115708	0.0478461	0.151174	0.389375	0.250273	0.297891	0.0980314	0.0414346	0.0138768	0.01	3.38376	3.20567	1.42925	-1.31526	-1.95451	-4.52093	0.000796554
ENSG00000168477	TNXB	0.0949457	0.119832	0.0936015	0.116115	1.14139	1.50223	1.24006	1.59807	0.226578	0.350082	0.53883	0.313235	3.6216	3.75843	1.42488	2.02252	-2.19673	-1.7359	1.24908e-07
ENSG00000239828	RP11-446H18.5	0.0969096	0.01	0.0297228	0.0921796	0.621335	0.807868	0.642898	0.604119	0.179872	0.106437	0.10694	0.0363902	3.74075	3.35468	1.42118	0.233612	-2.31957	-3.12107	5.48624e-05
ENSG00000244558	RP11-445H22.4	0.167787	0.69758	0.540344	0.398994	4.23582	6.69389	5.11329	5.12519	0.747424	1.56639	1.5738	0.189015	3.6588	3.44621	1.41889	0.908164	-2.23991	-2.53805	6.1533e-05
ENSG00000164970	FAM219A	12.0748	9.6389	9.08338	11.977	170.658	151.054	166.534	166.04	30.044	27.6288	24.4883	25.3056	3.88909	3.98108	1.40929	1.24144	-2.47981	-2.73964	7.47568e-13
ENSG00000196358	NTNG2	0.531836	0.671236	1.136	1.3731	6.87301	6.44675	7.25329	7.27017	1.05764	2.12787	1.92832	1.36943	3.46877	2.53314	1.4048	0.394315	-2.06397	-2.13883	3.55351e-06
ENSG00000196267	ZNF836	1.19173	0.935317	1.18604	1.57311	8.59584	8.37056	10.4673	9.46066	2.16681	3.44583	3.40845	3.31517	2.99576	2.8525	1.39983	1.28501	-1.59593	-1.56748	4.94287e-08
ENSG00000273237	CTB-119C2.1	0.218372	0.453946	0.267905	0.207714	4.11277	4.24765	4.8893	3.35787	0.891699	0.879413	0.642596	0.656003	3.63636	4.11602	1.39744	1.44908	-2.23892	-2.66694	1.48445e-07
ENSG00000105650	PDE4C	0.04822	0.0751788	0.144197	0.149066	3.17374	2.98612	3.44883	3.59213	0.161101	0.158881	0.19954	0.0814813	5.6415	4.58551	1.37466	-0.0615124	-4.26683	-4.64702	1.76116e-09
ENSG00000174460	ZCCHC12	0.138306	0.239588	0.339354	0.219259	109.347	94.927	120.31	120.13	0.564756	0.405073	0.406987	0.467413	9.07831	8.74961	1.35975	0.646445	-7.71856	-8.10317	1.52813e-14
ENSG00000172346	CSDC2	2.87989	3.15779	2.56249	3.16077	24.3487	22.9147	23.4616	26.8306	6.52012	8.96765	6.60038	6.16766	2.96866	3.13543	1.35906	1.15763	-1.60959	-1.9778	2.24275e-09
ENSG00000205336	GPR56	3.14037	1.85049	2.05906	2.29324	145.45	133.502	147.114	143.649	6.8431	5.89333	7.83125	8.1757	5.80458	6.06192	1.3516	1.87885	-4.45298	-4.18307	1.27959e-13
ENSG00000157470	FAM81A	0.387221	0.134157	0.22056	0.263087	5.6525	4.6773	4.95416	4.39096	0.718716	0.607554	0.732512	0.955514	4.30834	4.27219	1.34697	1.80331	-2.96137	-2.46888	2.72128e-09
ENSG00000215861	WI2-1896O14.1	0.818462	0.01	0.01	0.01	9.18323	4.87354	9.84128	5.78245	0.607654	1.4982	0.602115	0.922014	4.08469	9.60952	1.3459	6.25184	-2.73878	-3.35768	2.08443e-05
ENSG00000168481	LGI3	0.01	0.01	0.01	0.01	0.410874	0.624109	0.680213	0.653387	0.025375	0.0250254	0.0251437	0.0256682	5.69346	6.05918	1.33343	1.34517	-4.36003	-4.71401	5.59338e-07
ENSG00000264329	MIR3911	24.5338	21.577	16.4964	20.6437	247.291	226.997	190.144	210.587	51.4917	64.2551	26.0318	45.7088	3.36259	3.43158	1.32779	0.94981	-2.03479	-2.48177	1.17858e-07
ENSG00000224557	HLA-DPB2	0.01	0.01	0.01	0.01	0.922728	0.783507	1.00022	0.683552	0.01	0.0401438	0.01	0.01	6.41467	6.39555	1.32607	0	-5.0886	-6.39555	2.46981e-06
ENSG00000261534	RP11-244O19.1	1.44251	1.15985	1.20206	1.42388	10.7319	9.5618	8.80221	9.19596	3.57662	2.8697	1.3215	2.23823	2.96314	2.77694	1.30866	0.438931	-1.65448	-2.33801	7.89028e-07
ENSG00000176293	ZNF135	4.19875	3.99766	4.39419	5.91451	32.1348	33.6852	38.4528	41.3795	9.2805	11.0008	10.4161	7.40188	3.00546	2.95311	1.30708	0.789473	-1.69838	-2.16364	4.82121e-09
ENSG00000108001	EBF3	9.25524	6.79858	7.84039	8.4226	73.9253	73.5512	83.2156	95.0038	18.8799	19.6949	1.91497	2.68175	3.1995	3.45399	1.26474	-1.82292	-1.93476	-5.27691	0.000759941
ENSG00000089558	KCNH4	0.0262114	0.01	0.01	0.024932	11.0916	10.0825	10.6288	11.013	0.0291903	0.0575763	0.01	0.01	9.19164	9.27505	1.2607	-0.804551	-7.93094	-10.0796	1.73759e-11
ENSG00000108753	HNF1B	0.01	0.01	0.01	0.01	0.35268	0.575448	0.214659	0.408801	0.01	0.0379076	0.0190434	0.0194407	5.53625	4.96222	1.26025	0.944261	-4.276	-4.01796	2.11929e-05
ENSG00000251660	AC007036.5	4.85789	4.35278	2.77438	3.34609	105.723	76.605	94.1814	81.6607	12.1259	9.935	10.3517	6.22735	4.30709	4.84449	1.26011	1.43764	-3.04698	-3.40685	8.15492e-10
ENSG00000184307	ZDHHC23	0.172911	0.134791	0.198874	0.109648	7.0328	5.83441	7.24102	7.11415	0.320938	0.411471	0.651925	0.405809	5.38602	5.54006	1.25111	1.77753	-4.13491	-3.76252	9.67591e-11
ENSG00000268332	AL035406.1	2.53959	3.95941	4.67345	2.41564	29.0033	39.3172	15.7947	34.8291	4.24232	11.157	2.80243	4.29135	3.39403	2.83614	1.24458	0.000955941	-2.14945	-2.83519	0.000145923
ENSG00000235314	LINC00957	0.0380516	0.158201	0.105036	0.108583	5.07757	4.66751	5.20645	6.02507	0.127128	0.334338	0.01	0.128598	5.63389	5.71637	1.23352	-0.624137	-4.40037	-6.34051	2.97598e-08
ENSG00000136854	STXBP1	27.06	23.5851	20.5665	24.2869	251.549	229.293	243.502	234.92	51.6977	66.7073	32.5753	33.446	3.24707	3.41499	1.22524	0.557713	-2.02183	-2.85728	8.17963e-08
ENSG00000063015	SEZ6	0.100777	0.0418986	0.01	0.01	13.1084	12.7457	10.4546	9.52397	0.0448923	0.28778	0.0889662	0.0908222	7.50151	9.96423	1.22136	3.16823	-6.28015	-6.79601	2.9246e-09
ENSG00000178965	C1orf173	0.01	0.0129549	0.0114684	0.0118557	0.164821	0.163278	0.372089	0.264176	0.0416418	0.01	0.01	0.01	3.83725	4.76973	1.16973	-0.221823	-2.66752	-4.99156	4.95988e-05
ENSG00000069712	KIAA1107	1.53512	1.64183	1.35108	1.37555	22.5199	22.7066	25.5707	26.2405	3.44396	3.64087	1.4976	1.8296	3.83145	4.24807	1.15709	0.287189	-2.67436	-3.96088	1.27484e-08
ENSG00000145335	SNCA	6.71842	6.44997	5.45032	5.5856	48.182	44.7688	49.4076	45.782	13.3076	15.997	6.73465	5.80632	2.81939	3.1086	1.15405	0.184443	-1.66534	-2.92416	5.81616e-06
ENSG00000149243	KLHL35	0.630188	0.379215	0.396738	0.31549	63.637	68.9268	76.531	97.8402	1.182	1.05642	0.732013	0.70992	7.03704	7.93561	1.14898	1.01759	-5.88806	-6.91801	7.53475e-13
ENSG00000270005	RP11-380L11.3	1.40654	2.01016	1.77951	2.67578	16.9088	12.5629	10.06	10.3026	2.34959	5.21375	2.91022	3.56512	3.10865	2.19233	1.14642	0.539438	-1.96223	-1.65289	2.19479e-05
ENSG00000147437	GNRH1	1.63445	1.5168	2.36325	2.66515	1363.89	1157.52	1532.84	1569.31	3.5754	3.39791	3.73605	3.35368	9.64409	9.26895	1.14592	0.495631	-8.49817	-8.77332	7.61451e-15
ENSG00000180354	MTURN	4.37741	4.27159	3.43372	4.01398	108.994	93.5726	111.759	102.399	10.2233	8.87184	10.4428	7.46782	4.54972	4.84573	1.1426	1.26595	-3.40712	-3.57978	8.13352e-13
ENSG00000197580	BCO2	0.10605	0.220453	0.167278	0.129695	1.27488	0.992319	1.14953	1.13331	0.303693	0.415984	0.217334	0.290136	2.79574	2.94243	1.14025	0.772991	-1.65549	-2.16944	2.99128e-06
ENSG00000099864	PALM	19.6634	15.723	15.4977	17.7845	214.43	198.025	223.711	234.019	31.189	46.5722	33.0158	25.7284	3.54297	3.78168	1.13585	0.819698	-2.40711	-2.96198	5.95873e-10
ENSG00000107864	CPEB3	0.586244	0.379141	0.503454	0.693941	7.11021	7.36946	7.7945	8.02378	0.812463	1.30206	0.905689	0.924584	3.90678	3.72362	1.13116	0.612159	-2.77562	-3.11146	5.96008e-10
ENSG00000105520	DKFZP761J1410	12.8842	12.5097	13.6188	12.0461	148.994	132.705	141.344	138.421	23.7275	31.8565	27.291	24.7451	3.4716	3.44635	1.13019	1.01972	-2.34142	-2.42663	1.97741e-11
ENSG00000188859	FAM78B	0.0385796	0.0200495	0.0354979	0.0366967	0.510166	0.620252	0.383906	0.432899	0.0644464	0.0635585	0.0851452	0.01	4.26909	3.50003	1.12651	0.398241	-3.14258	-3.10179	9.96902e-06
ENSG00000198513	ATL1	2.16286	2.00369	1.77377	1.76659	32.7555	30.993	33.5413	32.0659	4.0319	5.06081	2.0754	2.09222	3.93547	4.21189	1.12586	0.235326	-2.80961	-3.97656	1.95725e-08
ENSG00000070729	CNGB1	0.0170315	0.0177023	0.0313421	0.01	40.4372	34.846	43.493	45.7388	0.0569015	0.0187058	0.01	0.01	11.0818	11.0757	1.12219	-1.04761	-9.95958	-12.1233	2.43377e-13
ENSG00000141744	PNMT	0.28237	0.220118	0.129907	0.47003	4.66747	3.61496	2.98548	3.34448	0.471693	0.620259	0.778988	1.03381	4.04289	3.39931	1.11975	1.59534	-2.92315	-1.80398	1.06541e-06
ENSG00000114757	PEX5L	0.101244	0.115754	0.102472	0.0770417	2.05691	2.43554	3.16095	2.81487	0.2706	0.200154	0.0670333	0.125458	4.37175	5.05697	1.11729	0.100704	-3.25446	-4.95627	1.02933e-08
ENSG00000163536	SERPINI1	0.510438	0.48633	0.234832	0.525986	4.55106	4.00189	4.28572	4.45479	0.947417	1.21467	0.516329	0.335428	3.10109	3.5221	1.1171	0.162892	-1.984	-3.3592	2.59439e-06
ENSG00000104863	LIN7B	3.34435	2.31738	2.37538	3.01369	20.1021	24.1064	25.3976	28.3096	6.14205	6.12187	8.22266	6.41132	2.96501	3.31701	1.11511	1.44121	-1.8499	-1.87579	2.87597e-09
ENSG00000266904	LINC00663	0.617025	0.665993	0.524065	0.677203	4.30791	3.84366	4.4279	4.02397	0.977868	1.79847	1.04752	0.668358	2.66754	2.81471	1.11364	0.514387	-1.5539	-2.30032	2.75766e-06
ENSG00000149295	DRD2	0.0249826	0.0259665	0.0689609	0.0475265	18.8006	15.4709	17.0603	18.8754	0.0278219	0.0823157	0.0551366	0.0281434	9.39374	8.2691	1.11218	-0.484132	-8.28156	-8.75323	3.07489e-13
ENSG00000155265	GOLGA7B	0.01	0.01	0.01	0.01	12.1506	11.1026	15.6496	15.7613	0.01	0.0331372	0.01	0.0339884	10.1832	10.6171	1.10893	1.13712	-9.07428	-9.47993	4.62165e-10
ENSG00000206344	HCG27	0.043693	0.136242	0.402028	0.124681	1.94345	2.39357	2.66308	2.88718	0.291953	0.0959767	0.482152	0.0984422	4.59116	3.39748	1.10832	0.140524	-3.48284	-3.25695	1.26076e-05
ENSG00000125510	OPRL1	0.6086	0.572325	0.373323	1.24049	8.50085	7.59296	7.75046	9.46672	1.06506	1.46418	1.88685	1.3712	3.76852	3.4153	1.09879	1.01353	-2.66973	-2.40177	1.70765e-07
ENSG00000198211	TUBB3	192.294	182.423	179.627	218.786	1871.3	1830.79	1953.71	2195.64	400.074	400.748	290.084	320.595	3.30447	3.38055	1.09568	0.616149	-2.20879	-2.7644	5.21462e-11
ENSG00000091513	TF	0.0240171	0.0873706	0.0883945	0.0799572	0.389776	0.371827	0.433177	0.494073	0.04012	0.197836	0.0397543	0.0676395	2.77345	2.46148	1.09511	-0.648567	-1.67834	-3.11005	0.000588123
ENSG00000179869	ABCA13	0.01	0.01	0.01	0.01	0.505762	0.323031	0.571515	0.448613	0.00616484	0.0364794	0.0122173	0.01	5.37294	5.67261	1.09235	0.151683	-4.28059	-5.52092	1.22142e-06
ENSG00000258947	TUBB3	88.5263	83.8792	82.2873	100.973	864.25	844.646	899.996	1013.9	184.112	183.452	134.615	146.485	3.30919	3.38455	1.09219	0.617188	-2.217	-2.76736	4.79749e-11
ENSG00000227811	FAM212B-AS1	1.1101	0.802659	1.8208	1.60684	6.55652	6.95499	9.06543	6.73968	1.66627	2.38546	0.266304	0.706834	2.82046	2.2051	1.08288	-1.8165	-1.73758	-4.0216	0.00042883
ENSG00000075945	KIFAP3	9.25147	8.18732	8.7012	11.0048	69.8373	63.4183	73.2816	67.5443	16.9278	19.9614	15.3022	15.113	2.93383	2.83721	1.0809	0.626158	-1.85292	-2.21105	2.09864e-10
ENSG00000236922	AC092661.1	0.01	0.01	0.01	0.01	0.695615	0.482373	0.82772	1.40679	0.0322202	0.01	0.01	0.01	5.88018	6.80381	1.07793	0	-4.80225	-6.80381	7.38377e-06
ENSG00000270393	AC000095.9	0.117681	0.01	0.01	0.335812	4.24413	4.76499	3.07399	4.8418	0.01	0.2585	0.01	0.01	6.14077	4.51667	1.07238	-4.11192	-5.06839	-8.62859	1.88959e-06
ENSG00000163888	CAMK2N2	1.43481	1.80528	1.87607	1.50844	95.4123	83.4575	95.1541	93.7749	5.21413	1.57586	6.33325	4.42368	5.78673	5.80275	1.06737	1.66825	-4.71935	-4.1345	8.55687e-10
ENSG00000089847	ANKRD24	0.344837	0.119473	0.169222	0.240538	5.33384	4.70898	5.60474	5.15918	0.40963	0.555481	0.558107	0.284875	4.43493	4.71528	1.05561	1.04072	-3.37933	-3.67456	2.35976e-09
ENSG00000138769	CDKL2	0.40804	0.480659	0.450535	0.7245	11.4456	11.0469	13.7039	11.8365	0.515003	1.31458	1.23074	1.22578	4.66161	4.442	1.04175	1.06391	-3.61986	-3.37809	2.622e-09
ENSG00000267827	CTC-471J1.8	5.15125	4.10484	5.21374	6.69644	34.2657	32.1046	44.8526	37.2501	7.26648	11.6925	12.6952	10.0585	2.84206	2.78523	1.03441	0.933905	-1.80766	-1.85133	1.84421e-07
ENSG00000271913	RP1-111C20.4	0.105437	0.438357	0.485071	0.300871	2.66177	3.26468	4.1968	3.08919	0.410968	0.694811	0.465397	0.534494	3.44604	3.21263	1.02393	0.347347	-2.42211	-2.86528	2.77733e-06
ENSG00000177989	ODF3B	0.893988	0.882738	0.904833	1.14798	12.5741	13.2017	17.7365	19.4497	1.49339	2.11103	4.53797	3.22271	3.85873	4.1791	1.02054	1.91858	-2.83818	-2.26051	1.16542e-07
ENSG00000157087	ATP2B2	0.0708287	0.0736182	0.0372405	0.0481226	5.048	5.2779	6.293	5.97965	0.20283	0.0889048	0.0111656	0.01	6.15958	7.16762	1.01412	-2.01189	-5.14547	-9.17951	4.28564e-08
ENSG00000143858	SYT2	0.132304	0.0412545	0.085215	0.0755081	0.461245	0.756295	0.872221	0.709297	0.117873	0.232497	0.160597	0.0596174	2.81047	3.29866	1.01345	0.454335	-1.79702	-2.84433	2.77393e-05
ENSG00000214076	CPSF1P1	0.01	0.01	0.01	0.01	1.19336	1.018	1.88647	1.37517	0.01	0.0302854	0.01	0.01	6.78879	7.34945	1.01026	0	-5.77853	-7.34945	3.46342e-07
ENSG00000180875	GREM2	0.320646	0.205092	0.113474	0.281535	22.8907	25.0264	23.9613	27.369	0.109873	0.948144	0.244961	0.111143	6.51005	7.02178	1.00895	-0.149586	-5.50111	-7.17137	2.02156e-08
ENSG00000151632	AKR1C2	0.0676	0.0526968	0.07775	0.0643006	6.78568	6.09825	6.28542	7.52213	0.0188207	0.222737	0.01	0.01	6.74283	6.60291	1.00577	-2.82833	-5.73706	-9.43124	3.78895e-08
ENSG00000153898	MCOLN2	0.179395	0.186461	0.137554	0.0284399	1.15019	1.70914	1.37606	1.26743	0.566054	0.164193	0.0659876	0.134728	2.96633	3.99324	0.997108	0.274023	-1.96922	-3.71922	0.000139852
ENSG00000250318	CTA-963H5.5	0.840305	2.6202	2.78345	2.23802	23.4361	17.6127	22.7861	28.9156	3.55607	3.32249	0.927276	3.02919	3.56828	3.36403	0.991122	-0.343897	-2.57716	-3.70793	1.93157e-06
ENSG00000147234	FRMPD3	0.0673859	0.0583666	0.0930046	0.0427313	2.71378	2.47437	2.58444	2.47843	0.187611	0.0616754	0.0123934	0.0253039	5.36656	5.22108	0.987217	-1.84827	-4.37935	-7.06935	3.6086e-08
ENSG00000157890	MEGF11	0.01	0.0456612	0.0303163	0.0731269	0.211247	0.170032	0.218578	0.23278	0.0978475	0.0120624	0.01	0.111351	2.7761	2.12544	0.981579	0.230343	-1.79452	-1.89509	0.0242484
ENSG00000267313	RP11-142I20.1	2.62307	2.05993	2.01128	2.24554	13.0338	15.1331	17.2564	16.2428	3.76508	5.47377	5.72478	3.3161	2.5885	2.97628	0.980282	1.08669	-1.60822	-1.88959	8.02812e-08
ENSG00000179921	GPBAR1	0.0764141	0.158847	0.21093	0.32708	8.63498	8.87266	11.596	15.0051	0.170197	0.293742	0.210807	0.129123	6.21758	5.62771	0.97967	-0.662395	-5.23791	-6.29011	5.49232e-10
ENSG00000272692	RP11-399K21.14	0.01	0.0565631	0.150218	0.0517637	1.243	1.16655	1.15075	1.28913	0.01	0.119539	0.120104	0.01	5.1779	3.59452	0.960596	-0.634555	-4.2173	-4.22907	1.39278e-05
ENSG00000130649	CYP2E1	0.0962145	0.0555577	0.0295096	0.0813498	0.616879	0.700224	0.784561	0.66643	0.0952439	0.199605	0.0943757	0.192689	3.11739	3.71023	0.958067	1.37265	-2.15932	-2.33759	1.75508e-06
ENSG00000176723	ZNF843	0.24904	0.258848	0.130941	0.406088	2.43784	2.24555	2.43394	2.61703	0.515066	0.468895	0.54963	0.24047	3.20497	3.23349	0.954092	0.557037	-2.25088	-2.67645	8.85974e-07
ENSG00000081665	ZNF506	2.2859	2.71898	3.01436	2.99988	13.5784	14.1209	17.1515	16.6885	4.43795	5.24948	6.07016	4.87482	2.46844	2.49227	0.952779	0.863816	-1.51566	-1.62846	1.86074e-08
ENSG00000273492	AP000230.1	0.01	0.0523015	0.0926001	0.01	1.33082	1.618	1.31442	1.6939	0.01	0.110533	0.01	0.01	5.56473	4.87385	0.952089	-2.35896	-4.61264	-7.23281	2.00111e-06
ENSG00000230392	RP5-1139I1.1	0.0353813	0.01	0.06511	0.01	0.68054	0.589899	0.704158	1.14692	0.01	0.077719	0.01	0.01	4.80709	4.62322	0.950793	-1.909	-3.85629	-6.53222	1.26401e-05
ENSG00000170075	GPR37L1	0.343469	0.11359	0.287302	0.386106	1.72668	1.61756	1.74777	0.973242	0.538984	0.342941	0.637439	0.298988	2.87123	2.01459	0.948275	0.475685	-1.92295	-1.53891	0.000134509
ENSG00000121413	ZSCAN18	6.71079	5.57235	6.5165	7.65519	46.4843	49.883	53.8575	59.8026	11.1688	12.5108	12.0644	8.88491	2.97186	3.00364	0.94697	0.563893	-2.02489	-2.43975	3.53939e-10
ENSG00000261141	RP11-303E16.5	0.520337	0.180277	1.91509	0.659921	4.58719	5.37048	6.90383	6.05491	1.15895	0.190497	0.574192	0.781561	3.82912	2.33128	0.945674	-0.925484	-2.88344	-3.25676	0.000149437
ENSG00000103184	SEC14L5	0.0158798	0.0165052	0.0146113	0.01	2.34806	1.98568	2.66658	2.17783	0.01	0.0523227	0.0175233	0.01	7.06415	7.62086	0.944432	0.161335	-6.11971	-7.45952	1.68397e-09
ENSG00000147465	STAR	0.79181	0.822995	0.728559	0.90899	6.10515	5.91793	5.19626	5.51472	0.729765	2.36905	0.602594	0.430616	2.89638	2.70948	0.940356	-0.664405	-1.95602	-3.37389	9.84534e-05
ENSG00000170113	NIPA1	3.35751	2.71561	2.38225	2.86753	38.8418	34.0574	36.337	34.2253	5.87196	5.77807	5.1531	5.83328	3.58539	3.74857	0.939824	1.06539	-2.64557	-2.68318	8.41388e-13
ENSG00000084731	KIF3C	25.7897	19.2184	22.0875	25.5098	187.488	161.99	175.295	171.714	43.0453	43.035	37.3834	42.293	2.95695	2.86603	0.935499	0.743274	-2.02145	-2.12275	7.42697e-12
ENSG00000106688	SLC1A1	0.308714	0.45457	0.236712	0.342588	6.98947	5.85174	6.08003	6.47908	0.2865	1.15847	0.2555	0.144906	4.07242	4.43828	0.920743	-0.532849	-3.15167	-4.97113	2.1287e-06
ENSG00000259881	RP11-830F9.5	0.01	0.0349703	0.0309576	0.032003	5.41986	5.68967	5.4824	4.61426	0.074938	0.01	0.0371274	0.01	7.94861	7.32521	0.917438	-0.417883	-7.03117	-7.74309	4.0995e-10
ENSG00000244291	C7orf13	0.942374	0.886204	0.825806	1.15249	6.14991	5.71826	7.64718	5.76271	1.94903	1.47859	2.67405	1.41547	2.6983	2.76097	0.906485	1.04768	-1.79182	-1.71329	6.44631e-07
ENSG00000189120	SP6	0.0758133	0.105066	0.162767	0.0480753	0.881013	0.662099	0.84872	0.976724	0.281432	0.0555109	0.0278866	0.170811	3.09275	3.11401	0.897479	-0.0855929	-2.19527	-3.1996	0.000117106
ENSG00000167702	KIFC2	10.6161	10.4813	10.7683	11.1539	76.712	77.7292	75.7206	88.2675	14.7847	24.4371	22.4088	17.2223	2.87192	2.90313	0.894595	0.854241	-1.97733	-2.04889	3.74689e-09
ENSG00000169258	GPRIN1	12.3346	10.5609	10.0458	11.872	69.736	62.9167	65.2596	66.2032	26.3304	16.1225	11.0507	16.7292	2.53452	2.58448	0.890796	0.341942	-1.64372	-2.24254	5.19115e-07
ENSG00000160883	HK3	0.01	0.0324937	0.143826	0.01	0.67648	0.78184	0.933277	0.467724	0.01	0.0686715	0.01	0.01	5.10092	3.18709	0.888593	-2.94323	-4.21232	-6.13031	8.99627e-05
ENSG00000105464	GRIN2D	2.14067	2.47687	2.28557	2.42038	51.9297	51.9727	55.1386	51.9937	3.6884	4.8575	3.83306	3.73102	4.49196	4.50876	0.888106	0.684679	-3.60385	-3.82409	8.34245e-13
ENSG00000205927	OLIG2	0.01	0.0318927	0.0282331	0.0583731	34.0468	33.9839	38.0528	41.2783	0.01	0.0674013	0.01	0.0691327	10.6653	9.8392	0.885661	-0.130196	-9.77961	-9.9694	9.73383e-13
ENSG00000181513	ACBD4	2.28805	1.86856	2.95742	2.85002	11.5263	10.9643	11.5875	12.7012	2.66943	4.99605	3.93758	3.34466	2.43584	2.06431	0.882969	0.326483	-1.55287	-1.73783	2.35067e-06
ENSG00000225975	AC074138.3	0.271142	1.03334	1.08109	2.23521	4.78067	5.05883	4.72174	6.42299	0.704569	1.68752	1.29656	0.712711	2.9151	1.74871	0.874789	-0.722905	-2.04031	-2.47162	0.000919308
ENSG00000164691	TAGAP	0.0251537	0.0261443	0.0462887	0.047852	0.574533	0.419378	0.750912	0.721299	0.0840372	0.01	0.0832712	0.0850084	4.27614	3.96702	0.874329	0.83797	-3.40181	-3.12905	6.81211e-06
ENSG00000165868	HSPA12A	3.16753	2.5167	2.53618	3.08536	43.7172	41.7846	45.4995	44.9409	5.66439	4.63299	0.117633	0.223018	3.91092	4.00793	0.857241	-4.0446	-3.05368	-8.05253	0.000421344
ENSG00000232224	LINC00202-1	0.041981	0.239989	0.193137	0.219626	0.706546	0.999904	0.992162	1.15149	0.233761	0.276648	0.115815	0.0236462	2.59738	2.37669	0.856111	-1.56545	-1.74127	-3.94214	0.000688477
ENSG00000178201	VN1R1	0.705011	0.488519	0.720772	0.894135	3.95515	3.17182	4.18985	4.10194	0.523425	1.63467	0.950864	0.617719	2.57805	2.36023	0.854526	-0.0419892	-1.72353	-2.40222	4.92277e-05
ENSG00000160973	FOXH1	6.28708	8.67022	7.07039	7.97363	55.475	54.6622	53.4134	60.4028	10.2507	16.6536	16.0975	12.082	2.88038	2.91945	0.846988	0.905453	-2.03339	-2.01399	1.6382e-08
ENSG00000154917	RAB6B	1.83269	1.24618	1.5287	1.95504	137.153	114.533	133.092	124.903	2.61321	2.91582	3.21312	2.83636	6.35308	6.21057	0.844628	0.796177	-5.50845	-5.41439	1.52813e-14
ENSG00000257918	RP11-482D24.3	0.127136	0.264287	0.467923	0.241862	2.75108	5.45065	5.06054	2.37765	0.283171	0.418905	0.140295	0.572887	4.38912	3.3895	0.842896	0.00688898	-3.54623	-3.38261	8.13117e-06
ENSG00000188760	TMEM198	3.86997	4.10532	2.93677	4.74366	25.9953	28.5552	27.6419	27.3083	6.0426	8.23792	7.70452	6.51693	2.77399	2.83886	0.840439	0.888809	-1.93355	-1.95005	5.55127e-09
ENSG00000186897	C1QL4	0.348655	0.673005	0.687438	0.710654	14.0112	13.5241	16.1702	17.8224	1.16484	0.656453	4.83674	2.58104	4.7523	4.60369	0.834049	2.40753	-3.91825	-2.19616	5.99745e-06
ENSG00000008056	SYN1	1.3808	0.901159	1.21141	1.3134	135.999	128.148	139.48	136.161	1.71653	2.32771	1.87806	1.66402	6.85492	6.77048	0.825599	0.488423	-6.02932	-6.28205	1.52813e-14
ENSG00000267419	CTC-559E9.6	2.17725	2.98716	2.6444	2.81654	17.1701	15.3499	21.9908	24.2136	4.55843	4.59128	4.90129	5.5922	2.65465	3.08081	0.825122	0.942275	-1.82953	-2.13854	4.021e-08
ENSG00000228677	TTC3-AS1	5.81304	2.63119	3.62331	6.42115	24.684	18.0885	22.2752	21.275	6.78694	8.1351	5.69045	7.07662	2.34065	2.11628	0.821407	0.346028	-1.51924	-1.77025	7.29181e-06
ENSG00000166619	BLCAP	43.1109	40.0176	40.7035	44.968	262.09	231.845	260.174	277.531	75.0784	71.7715	42.0526	46.7951	2.5709	2.64993	0.820927	0.0525197	-1.74998	-2.59741	8.30257e-08
ENSG00000033627	ATP6V0A1	11.225	9.28881	9.97454	10.7931	60.842	54.7221	60.3057	57.0203	17.5448	18.6729	14.7358	13.7966	2.49403	2.49812	0.820105	0.458267	-1.67392	-2.03985	4.4755e-10
ENSG00000088367	EPB41L1	9.38362	8.27049	8.34504	9.94641	87.3968	77.7572	88.3624	81.5518	14.4873	16.3288	15.9005	12.7528	3.22574	3.21557	0.803678	0.647533	-2.42206	-2.56803	5.1291e-12
ENSG00000166922	SCG5	1.64228	2.09712	1.03618	1.29433	18.6709	18.1609	19.7275	20.9434	2.35147	4.17433	1.65691	0.740023	3.30008	4.12528	0.803351	0.0405506	-2.49673	-4.08473	2.80152e-06
ENSG00000074211	PPP2R2C	0.01	0.01	0.01	0.01	1.93574	2.14401	2.00292	1.79846	0.01	0.0245629	0.024679	0.01	7.67234	7.57038	0.789223	0.794061	-6.88312	-6.77632	1.62792e-08
ENSG00000177875	C12orf68	0.351035	0.410468	0.807486	0.542591	116.999	103.937	118.003	129.164	0.781862	0.530124	0.629472	0.296587	8.18056	7.5163	0.784829	-0.543867	-7.39574	-8.06017	3.5912e-13
ENSG00000173064	HECTD4	8.62078	6.6132	6.95122	8.17237	41.3434	36.3281	40.0898	38.8721	10.9443	15.2056	12.2028	11.7477	2.35009	2.38436	0.779515	0.663253	-1.57058	-1.7211	1.6456e-09
ENSG00000090238	YPEL3	16.2638	13.2412	18.6835	18.9146	85.3975	71.8141	102.84	107.756	22.0732	28.5519	35.5731	24.9144	2.41367	2.48574	0.77889	0.685975	-1.63478	-1.79977	1.75471e-07
ENSG00000166947	EPB42	0.147619	0.268507	0.424459	0.245724	1.84115	1.47232	2.11162	2.02451	0.267143	0.44586	0.244346	0.291017	2.99325	2.62566	0.776888	-0.324037	-2.21636	-2.94969	3.31454e-06
ENSG00000108370	RGS9	0.252642	0.145885	0.284119	0.240311	13.2285	10.0959	13.3384	13.7194	0.312617	0.369971	0.37172	0.189738	5.87102	5.68915	0.77634	0.0984284	-5.09468	-5.59072	1.1836e-11
ENSG00000197405	C5AR1	0.592513	0.50717	0.897948	0.994578	6.87153	5.76952	8.49732	8.64746	0.465779	1.41636	0.423072	0.549688	3.52296	3.17938	0.775288	-0.960157	-2.74767	-4.13954	8.50225e-07
ENSG00000266070	MIR3960	4.52103	9.39817	10.3997	15.0513	47.556	36.3427	32.3356	52.1393	8.81098	14.8964	11.2251	5.09303	2.59157	1.7308	0.768262	-0.641243	-1.82331	-2.37204	0.000459653
ENSG00000003137	CYP26B1	0.0820366	0.0639507	0.245321	0.136557	2.07103	2.71111	2.62761	3.65653	0.0456801	0.202728	0.927905	0.554496	5.03374	4.04053	0.76687	1.95675	-4.26687	-2.08378	8.18483e-05
ENSG00000230992	FAM201B	0.283994	0.14759	0.0435515	0.01	2.90194	2.76205	3.12041	2.53754	0.368983	0.363899	0.104463	0.319926	3.7141	6.72321	0.763938	2.98639	-2.95017	-3.73682	1.94301e-06
ENSG00000231738	TSPAN19	0.226827	0.0523912	0.0695692	0.16781	0.878638	0.540257	0.97183	1.1312	0.252606	0.221445	0.166869	0.227133	2.3453	3.1472	0.76365	0.731009	-1.58165	-2.4162	6.26163e-05
ENSG00000166924	NYAP1	5.82243	6.08156	7.01995	5.9202	135.059	118.731	133.609	149.69	6.5161	13.6087	6.7732	7.14068	4.41412	4.4524	0.757528	0.104671	-3.65659	-4.34773	2.26243e-09
ENSG00000073910	FRY	0.0320236	0.0599127	0.0235724	0.0670133	11.7263	10.1292	10.3407	9.25485	0.0356631	0.119584	0.0494732	0.0865806	7.89314	7.75703	0.75586	0.586822	-7.13728	-7.17021	4.01748e-12
ENSG00000255458	RP11-539G18.2	0.223497	0.18584	0.164515	0.38266	2.25689	2.39547	2.55762	2.39638	0.248898	0.441843	0.394606	0.151064	3.5066	3.17852	0.754857	-0.0039714	-2.75175	-3.18249	5.31291e-07
ENSG00000158292	GPR153	7.98739	7.12345	6.72338	7.30994	67.9415	62.5344	67.3532	65.3738	10.691	14.7502	12.4009	10.0482	3.11013	3.24153	0.751582	0.6778	-2.35855	-2.56373	7.60682e-11
ENSG00000073150	PANX2	2.28784	1.55083	1.89153	1.9554	21.8433	16.7819	23.3437	25.341	3.47099	2.98617	1.75626	1.86761	3.33086	3.66169	0.750292	-0.0861754	-2.58057	-3.74786	6.79445e-09
ENSG00000146001	PCDHB18	0.0975221	0.01	0.01	0.01	0.508026	0.50327	0.646962	0.567409	0.0724037	0.107109	0.179359	0.0366203	3.2335	5.92406	0.739455	3.43282	-2.49404	-2.49124	0.000155366
ENSG00000205639	MFSD2B	1.11243	0.626298	1.25813	1.67538	11.9801	10.9848	14.3273	14.5051	1.8841	0.992704	1.96922	1.95809	3.72332	3.29699	0.726434	0.42091	-2.99689	-2.87608	4.15602e-08
ENSG00000203879	GDI1	90.6262	82.8716	95.1963	94.7021	500.966	458.473	501.29	520.242	136.299	150.325	126.905	123.592	2.46727	2.42744	0.724244	0.399567	-1.74303	-2.02787	1.05669e-10
ENSG00000266935	CTD-3234P18.2	1.68305	0.194371	0.516204	0.355758	5.62025	6.01306	6.28053	5.12937	1.24956	1.84851	0.206361	1.05333	2.63143	3.70988	0.722613	0.530736	-1.90882	-3.17914	0.000252006
ENSG00000198910	L1CAM	19.8576	19.1459	20.8652	22.5163	350.055	310.886	356.256	345.421	33.2409	30.734	24.8559	24.6895	4.08284	4.01566	0.713901	0.191674	-3.36894	-3.82398	1.60656e-12
ENSG00000135338	LCA5	2.43164	2.00759	2.26914	2.23094	11.9416	10.2279	11.9699	12.1268	3.32258	3.95869	3.40648	3.26384	2.32019	2.42081	0.713879	0.567807	-1.60632	-1.85301	1.38855e-09
ENSG00000226686	AC012309.5	0.141088	0.0488817	0.173091	0.0894681	1.97878	1.62422	1.57947	1.93495	0.104749	0.206611	0.311382	0.0529796	4.24535	3.74257	0.712812	0.472729	-3.53254	-3.26984	1.02178e-06
ENSG00000232767	RP11-498B4.5	3.56946	2.33595	1.33806	2.012	42.4336	45.3427	50.6485	44.6678	6.33077	3.33957	0.01	0.148929	3.89372	4.83046	0.711528	-4.39773	-3.18219	-9.2282	7.41829e-05
ENSG00000273045	C2ORF15	0.147073	0.0509553	0.27065	0.27979	4.06651	4.14522	6.03705	5.37875	0.0545962	0.26922	0.108197	0.276136	5.3739	4.3743	0.709464	-0.518231	-4.66444	-4.89253	3.36697e-08
ENSG00000272520	CTD-2044J15.2	3.3856	2.8347	2.88441	2.50472	13.8682	15.045	15.0514	15.4382	5.51593	4.64804	4.7046	4.52024	2.21667	2.50019	0.708406	0.775473	-1.50827	-1.72472	6.36696e-09
ENSG00000215196	AC091878.1	0.104917	0.109049	0.0321786	0.133061	3.65766	5.24771	4.43711	5.31948	0.272628	0.0768205	0.154367	0.196985	5.37922	5.88374	0.707702	1.08836	-4.67152	-4.79539	1.60573e-09
ENSG00000256929	AC067852.1	53.9663	54.442	58.126	55.2577	313.693	303.196	334.847	341.958	86.9676	89.9533	68.6596	61.1517	2.50854	2.57753	0.706631	0.195203	-1.80191	-2.38232	4.10073e-09
ENSG00000254064	CTD-2530N21.4	3.59487	2.90613	2.20514	2.84951	17.0463	18.7895	19.8737	12.6989	4.67067	5.92242	3.96694	3.37475	2.46266	2.68797	0.704388	0.5385	-1.75828	-2.14947	2.2388e-06
ENSG00000050438	SLC4A8	2.98243	1.59209	2.37941	2.56261	20.6455	17.2868	18.0333	16.2891	3.56221	3.8694	4.17603	3.90789	3.05173	2.79598	0.700054	0.709957	-2.35168	-2.08602	1.10742e-09
ENSG00000131979	GCH1	1.91695	2.31849	2.02038	2.15492	15.9637	14.9011	18.0785	15.8175	3.53215	3.33037	7.1153	2.78771	2.86538	3.02116	0.696225	1.24599	-2.16915	-1.77517	9.1145e-07
ENSG00000107159	CA9	0.123178	0.128029	0.170007	0.0585828	1.48079	1.10019	1.14913	1.22859	0.0685885	0.338217	0.135926	0.277524	3.36097	3.37875	0.695466	0.854954	-2.66551	-2.52379	2.08198e-05
ENSG00000178631	ACTG1P1	0.0911013	0.284068	1.00589	0.779894	3.0665	2.9293	2.94628	3.1803	0.40582	0.200114	0.402121	0.307883	3.99834	1.77853	0.691621	-1.33066	-3.30672	-3.10919	9.23457e-05
ENSG00000270903	HNRNPA3P9	0.10506	0.327592	0.676671	0.0999319	2.65225	1.6265	1.96021	1.57182	0.467999	0.230776	0.3478	0.591759	3.30591	2.18525	0.691621	0.274806	-2.61429	-1.91044	0.000839839
ENSG00000131437	KIF3A	12.3316	10.8526	11.457	10.8593	68.2071	58.2784	67.8311	65.6696	19.5471	17.8773	13.3596	17.3394	2.44776	2.58068	0.690838	0.460098	-1.75692	-2.12058	5.70595e-10
ENSG00000196391	ZNF774	0.621983	0.587709	0.502929	0.573697	3.87455	3.74849	3.70423	3.57186	0.944552	0.993641	0.686358	1.14656	2.65573	2.75665	0.680074	0.767626	-1.97565	-1.98902	2.29869e-08
ENSG00000187134	AKR1C1	0.240133	0.0907602	0.0803458	0.114206	5.97036	4.92657	6.47626	6.49133	0.145868	0.383622	0.144538	0.0983691	5.04141	6.05861	0.678236	0.320248	-4.36318	-5.73836	5.6027e-09
ENSG00000069696	DRD4	1.67128	3.25707	3.07555	2.25209	14.064	16.669	16.2844	17.451	4.1102	3.74764	3.53482	1.4905	2.64061	2.6627	0.673029	-0.0842812	-1.96758	-2.74698	6.65388e-06
ENSG00000074276	CDHR2	0.807749	0.419781	0.831704	0.658564	6.21927	5.38234	6.55472	6.45008	0.963804	0.992771	0.466898	0.498304	3.2405	3.1254	0.672572	-0.62667	-2.56792	-3.75207	1.04854e-07
ENSG00000130787	HIP1R	6.47359	6.00602	5.49008	6.29539	28.4827	30.2168	29.5613	32.3565	8.08025	11.7864	11.059	8.85884	2.23377	2.39334	0.670773	0.757052	-1.563	-1.63629	8.10225e-09
ENSG00000154721	JAM2	0.88353	0.378135	0.669491	0.856886	17.2858	19.249	15.9678	17.1714	0.578791	1.42704	0.382343	0.175644	4.85587	4.44036	0.668872	-1.45181	-4.187	-5.89216	4.49292e-07
ENSG00000047597	XK	0.01	0.01	0.01	0.01	2.1613	1.78815	1.44992	1.57645	0.01	0.0216989	0.01	0.0445127	7.62551	7.24144	0.664434	1.44659	-6.96108	-5.79485	1.10186e-07
ENSG00000198520	C1orf228	0.649737	0.979224	1.106	0.401716	6.32678	7.04133	7.79905	9.0323	0.651222	1.92675	0.89623	0.951525	3.03677	3.48072	0.662285	0.293413	-2.37449	-3.18731	3.49615e-06
ENSG00000272790	AP002884.3	0.01	0.691937	1.07194	0.158306	4.80177	2.37841	3.93333	2.48999	0.926721	0.182791	0.734619	0.562459	3.35461	2.38437	0.660512	0.0763126	-2.6941	-2.30805	0.00229425
ENSG00000204869	IGFL4	0.01	0.0286991	0.025406	0.105056	0.597482	0.526124	0.549527	0.688507	0.0307497	0.0303261	0.01	0.0311051	4.85969	3.24635	0.6583	-1.66624	-4.20139	-4.91259	7.27419e-06
ENSG00000236662	RP11-108L7.4	4.81185	5.31395	6.91793	4.86306	27.8383	38.3223	39.2788	33.3709	7.70317	8.25765	7.30108	12.5353	2.70794	2.6245	0.656498	0.751685	-2.05144	-1.87281	8.76497e-07
ENSG00000132535	DLG4	20.406	20.5399	23.2888	22.9856	153.707	144.317	164.229	165.214	29.4032	35.1122	29.9845	27.7467	2.86364	2.83175	0.655925	0.319138	-2.20771	-2.51261	4.37363e-11
ENSG00000003987	MTMR7	0.885421	0.957856	0.997583	1.30628	18.4208	16.3762	20.5661	20.9969	1.60988	1.29	1.43568	1.89311	4.23862	4.17317	0.653721	0.530945	-3.5849	-3.64223	1.12166e-11
ENSG00000140280	LYSMD2	0.247959	0.30927	0.136891	0.235857	3.33855	2.48048	3.14598	3.70977	0.331368	0.54467	0.328347	0.223465	3.38444	4.20104	0.652724	0.565977	-2.73171	-3.63507	9.60575e-08
ENSG00000267248	CTD-2319I12.4	1.44494	1.22878	0.906488	1.12452	6.47442	6.10095	4.82009	7.61545	1.24344	2.95757	1.30458	1.55376	2.23368	2.6142	0.651885	0.492984	-1.58179	-2.12122	2.95688e-05
ENSG00000197406	DIO3	1.07649	0.813733	1.30565	1.67555	60.7052	42.8301	50.7608	55.0883	0.381446	2.57959	0.01	0.01	5.77542	5.14997	0.647549	-7.21975	-5.12788	-12.3697	3.69802e-06
ENSG00000214432	AC068831.10	0.179971	0.0311765	0.110396	0.171187	1.0457	0.714425	1.15662	0.448764	0.0668082	0.263551	0.132398	0.202741	3.05936	2.51128	0.645786	0.2512	-2.41357	-2.26008	0.000335816
ENSG00000259436	CTC-378H22.2	0.263052	0.109365	0.532486	0.350298	24.1599	16.9792	28.1395	25.5813	0.292948	0.288912	0.232222	0.01	6.78745	5.92728	0.643754	-1.86573	-6.14369	-7.79301	9.85085e-10
ENSG00000166763	STRCP1	0.01	0.01	0.0355245	0.0183621	0.324895	0.528759	0.408206	0.385088	0.01	0.0212021	0.0213023	0.01	5.41558	3.87986	0.641642	-0.783659	-4.77394	-4.66352	4.07091e-06
ENSG00000162670	BRINP3	0.0598158	0.0310858	0.0825566	0.0284482	1.3303	1.70964	0.781236	0.708477	0.01	0.131392	0.01	0.01	5.06359	3.74634	0.637326	-2.47255	-4.42626	-6.21889	1.24207e-05
ENSG00000170091	NSG2	0.01	0.0270918	0.0239831	0.0743791	161.529	132.39	145.898	130.412	0.0290276	0.0286276	0.0287629	0.01	12.952	11.4559	0.63635	-1.34343	-12.3157	-12.7993	1.3567e-14
ENSG00000167861	HID1	0.414999	0.258806	0.198561	0.410534	53.0223	53.2377	59.467	60.3712	0.462164	0.58342	0.476269	0.355304	7.30105	7.6202	0.633905	0.449176	-6.66715	-7.17103	6.57849e-14
ENSG00000267396	RP11-845C23.3	11.5174	9.60467	13.3084	9.17187	79.8544	63.3175	72.4641	72.2988	17.4499	15.2973	10.1971	14.0307	2.76092	2.68696	0.632616	0.108008	-2.12831	-2.57895	2.74733e-08
ENSG00000188290	HES4	10.3037	6.69347	7.44909	8.2257	298.939	294.607	289.288	337.791	11.8846	14.3479	38.0697	16.9965	5.12599	5.32213	0.626058	1.81272	-4.49993	-3.50941	2.23909e-08
ENSG00000263620	RP11-599B13.6	60.1468	52.0577	59.4569	73.5877	372.818	306.487	346.263	327.555	78.4369	94.5465	90.7989	68.7642	2.59793	2.34045	0.624502	0.262217	-1.97343	-2.07823	3.43082e-09
ENSG00000157343	ARMC12	1.81335	1.88477	2.6696	2.06982	10.0277	9.32915	10.2855	10.3094	2.42333	3.26625	2.16112	2.77818	2.38798	2.1195	0.62153	0.0595959	-1.76645	-2.05991	7.52411e-07
ENSG00000180712	RP11-290F5.2	0.174846	0.0454331	0.12066	0.0415781	0.525481	0.676731	0.652461	0.871972	0.146038	0.192035	0.01	0.196968	2.44828	3.23209	0.618001	0.351299	-1.83028	-2.88079	0.00104512
ENSG00000175395	ZNF25	5.45287	4.81119	5.61937	5.53252	33.854	29.5253	32.8885	30.0039	6.8283	8.89024	7.22069	7.42594	2.62641	2.4956	0.614865	0.393281	-2.01154	-2.10232	3.57843e-10
ENSG00000128203	ASPHD2	2.08342	1.87886	1.49413	2.18573	18.1583	14.3396	17.7213	18.3738	3.13909	2.92759	3.00905	4.34888	3.03594	3.29408	0.614577	0.999649	-2.42136	-2.29443	8.99e-10
ENSG00000226944	RP1-120G22.11	2.44889	2.26252	1.50218	3.10582	11.4487	11.6655	10.4922	10.8558	2.72721	4.48272	4.80417	1.83915	2.29455	2.21189	0.613826	0.527765	-1.68072	-1.68412	0.000112423
ENSG00000165434	PGM2L1	4.90411	3.70367	4.35676	4.30857	57.953	50.8222	56.4935	54.2605	6.22822	6.87207	17.0881	11.7431	3.65957	3.67596	0.605886	1.73431	-3.05368	-1.94165	3.71448e-07
ENSG00000110675	ELMOD1	0.0351275	0.01	0.0161607	0.0167065	0.401173	0.543834	0.415095	0.262775	0.0586797	0.01	0.01	0.01	4.38825	4.36629	0.605876	-0.716651	-3.78237	-5.08294	2.04727e-05
ENSG00000272091	RP4-758J24.5	2.66049	2.47109	3.17715	2.53064	14.2223	10.9208	14.7863	13.7621	2.58462	5.22236	4.18514	4.01738	2.29269	2.32241	0.605361	0.523138	-1.68733	-1.79927	1.94087e-06
ENSG00000169891	REPS2	0.0362128	0.0564585	0.00833002	0.0430567	1.40395	1.21831	1.23871	1.1513	0.100821	0.0397728	0.279725	0.142781	4.82254	5.53948	0.601338	3.03951	-4.2212	-2.49997	5.05451e-07
ENSG00000118263	KLF7	15.9577	13.6314	16.2361	15.8549	97.8805	89.6246	98.9983	96.7504	27.5907	17.1606	37.7798	23.3434	2.66379	2.60876	0.596863	0.929553	-2.06693	-1.67921	1.85317e-07
ENSG00000227484	XX-C283C717.1	6.00462	3.62387	7.48544	4.97458	47.5023	41.9828	50.8374	45.8842	6.90276	7.65862	7.69482	6.10972	3.21626	2.95653	0.596765	0.147837	-2.6195	-2.8087	1.35404e-08
ENSG00000140488	CELF6	0.343991	0.11918	0.342889	0.327202	45.4883	40.7611	51.4885	48.6776	0.319238	0.377808	0.695922	0.419806	7.54083	7.22382	0.58971	0.735558	-6.95112	-6.48826	8.13352e-13
ENSG00000164604	GPR85	0.180786	0.086726	0.115162	0.119051	7.33916	6.0946	7.10952	6.20713	0.263281	0.137464	0.0920757	0.0783305	5.65012	5.82927	0.58308	-0.458841	-5.06704	-6.28811	1.10679e-10
ENSG00000266002	RP11-567L7.5	2.39194	1.49169	1.32052	2.27519	7.47625	10.2548	10.711	7.15727	1.59827	4.20333	4.7511	1.07783	2.1908	2.31305	0.579048	0.696953	-1.61176	-1.61609	0.00239702
ENSG00000220205	VAMP2	51.6785	42.657	50.62	52.1798	288.91	243.515	279.088	251.878	63.9659	76.7039	62.966	50.8068	2.49671	2.36878	0.576441	0.146319	-1.92026	-2.22246	2.47378e-09
ENSG00000258768	CTD-2292M16.8	0.913297	1.34014	1.5571	1.66079	7.58859	5.66216	7.65148	6.39665	1.55556	1.79965	1.15603	1.27093	2.55587	2.12619	0.574271	-0.406966	-1.9816	-2.53315	1.03465e-06
ENSG00000198598	MMP17	1.05346	0.587532	0.520115	0.70876	22.1778	23.6225	25.8238	26.845	1.05873	1.38278	1.58779	1.50514	4.80272	5.42154	0.573205	1.33163	-4.22951	-4.08991	7.59112e-12
ENSG00000131480	AOC2	1.20002	0.683994	0.926071	1.03099	8.14376	8.80514	9.0042	8.20468	1.25018	1.53057	0.512602	1.22102	3.16931	3.13639	0.561667	-0.174894	-2.60764	-3.31129	9.94929e-08
ENSG00000271948	RP11-242F4.2	5.89476	5.07055	4.3017	4.06028	25.902	34.1321	34.1333	36.2401	7.92292	8.26026	3.36458	6.64057	2.45284	3.07312	0.561548	0.258828	-1.89129	-2.81429	7.9035e-07
ENSG00000164796	CSMD3	0.0500089	0.0519785	0.0874269	0.0523249	2.11617	1.95343	1.95323	2.26329	0.100246	0.0494327	0.01	0.01	5.31842	4.91511	0.553482	-2.8048	-4.76494	-7.71991	6.51875e-07
ENSG00000138111	TMEM180	1.37281	1.20306	1.13931	0.947352	5.56583	6.15487	4.75452	5.83951	1.82861	1.95123	1.03964	1.42521	2.18593	2.34398	0.553265	0.240298	-1.63266	-2.10368	2.13001e-06
ENSG00000171435	KSR2	0.011242	0.01	0.01	0.00534667	1.58797	0.963947	1.3704	1.28949	0.0125197	0.0185208	0.0186084	0.0379932	6.90852	7.4373	0.547231	1.88292	-6.36129	-5.55438	3.0295e-10
ENSG00000179057	IGSF22	0.106232	0.0220831	0.0781965	0.0808373	1.94114	1.74586	1.61209	1.24499	0.0473219	0.14001	0.0234453	0.0718032	4.84469	4.16714	0.54591	-0.739565	-4.29878	-4.9067	6.00807e-08
ENSG00000214694	ARHGEF33	0.112408	0.0584176	0.103429	0.0891014	0.608093	0.423912	0.233036	0.420441	0.0625917	0.185188	0.103368	0.105525	2.59485	1.76305	0.536533	0.117683	-2.05832	-1.64537	0.000969541
ENSG00000203280	CTA-221G9.11	0.433067	0.225061	0.298855	0.308947	3.38398	2.19189	3.77077	2.96964	0.241143	0.713461	1.07525	0.121965	3.08276	3.47116	0.536533	0.978008	-2.54623	-2.49315	6.66512e-05
ENSG00000225125	RANP4	0.628112	0.816063	0.288969	0.597455	4.15298	6.91918	9.18019	8.02688	1.04925	1.03479	0.346561	1.06137	2.93862	4.27886	0.529136	0.667509	-2.40948	-3.61135	2.21637e-06
ENSG00000125657	TNFSF9	0.062072	0.129033	0.171341	0.0590424	3.73101	1.77412	4.40096	3.63731	0.138253	0.136348	0.0684964	0.0699255	4.84834	5.12478	0.522971	-0.734965	-4.32536	-5.85974	6.02652e-08
ENSG00000145198	VWA5B2	0.01795	0.0932846	0.0495483	0.01	1.44577	1.19709	1.16103	1.16373	0.07996	0.0788584	0.0396156	0.0808841	4.57042	5.28688	0.513772	1.0169	-4.05665	-4.26998	1.99155e-07
ENSG00000158458	NRG2	0.203715	0.0941058	0.208269	0.107651	1.03401	1.45563	1.46406	1.38281	0.176452	0.248602	0.01	0.178491	3.06342	3.17175	0.513202	-0.745059	-2.55022	-3.91681	3.19117e-05
ENSG00000117289	TXNIP	177.767	126.481	130.263	157.785	918.817	841.135	978.013	930.424	166.823	266.554	152.187	114.045	2.53222	2.72801	0.510378	-0.113628	-2.02184	-2.84164	6.7797e-07
ENSG00000260248	RP11-143K11.1	0.71488	0.185759	0.493331	0.424993	7.94941	7.66217	8.4476	8.46726	0.298548	0.981448	1.67635	0.402664	4.11552	4.20314	0.507118	1.17882	-3.60841	-3.02432	9.01939e-07
ENSG00000198722	UNC13B	21.5474	16.0227	16.1653	19.2936	107.89	92.9067	107.539	105.552	22.5193	30.7774	18.2679	20.7758	2.41808	2.58725	0.504463	0.138943	-1.91362	-2.44831	1.14975e-08
ENSG00000250790	RP11-46H11.3	0.275993	0.01	0.01	0.0875074	3.64965	4.49197	4.00517	2.86749	0.102453	0.303125	0.406077	0.310912	4.83126	6.13921	0.504001	2.87837	-4.32726	-3.26085	8.32768e-07
ENSG00000128872	TMOD2	0.556872	0.422619	0.390391	0.529692	85.2215	74.1498	85.3314	77.1324	0.679224	0.708699	0.526721	0.448091	7.34614	7.46414	0.502823	0.0833596	-6.84332	-7.38078	1.78356e-14
ENSG00000136040	PLXNC1	1.02989	0.648756	0.784895	0.732241	37.4176	32.4339	34.5495	34.163	0.764622	1.61101	0.183673	0.386729	5.37892	5.50115	0.501014	-1.4113	-4.87791	-6.91245	1.15662e-07
ENSG00000235381	RP11-477D19.2	1.59876	2.35411	2.45174	2.47118	10.4907	10.8288	11.8076	11.3368	2.11429	3.47527	3.74898	2.85164	2.4312	2.23308	0.499837	0.423086	-1.93136	-1.80999	1.10416e-06
ENSG00000205593	DENND6B	3.98589	3.38635	4.0183	3.82432	31.4999	29.5128	32.5285	36.018	3.70551	6.71887	4.58967	3.14313	3.04893	3.12767	0.499787	-0.0203446	-2.54915	-3.14802	1.57998e-08
ENSG00000225400	RP11-1114A5.5	1.89591	1.31372	1.59909	1.50282	13.1053	8.09062	10.8088	10.44	1.23164	3.29697	1.5691	1.42386	2.7233	2.77615	0.496659	-0.0515826	-2.22665	-2.82773	3.84644e-06
ENSG00000171130	ATP6V0E2	15.2798	11.0048	10.0545	12.743	115.222	107.784	105.36	111.185	18.804	18.2398	11.9562	17.2478	3.08479	3.24772	0.495009	0.357291	-2.58978	-2.89043	2.27465e-10
ENSG00000273108	RP11-416N2.4	0.2873	0.447923	0.330438	0.341597	3.62648	5.30326	5.36048	4.83565	0.719891	0.315544	0.951106	0.647299	3.60237	3.92334	0.493984	1.25003	-3.10838	-2.67332	1.58094e-07
ENSG00000099625	C19orf26	8.92014	10.1657	9.18668	8.76473	71.1445	67.5937	74.0642	81.519	13.0856	13.7756	19.3869	13.6193	2.86179	3.11552	0.493019	0.878645	-2.36877	-2.23687	4.66423e-10
ENSG00000224097	RP11-472B18.1	0.186893	0.453258	0.229285	0.59257	1.64761	2.15152	1.70479	2.17478	0.6244	0.273688	0.137491	0.0701796	2.56918	2.23894	0.488444	-1.98459	-2.08074	-4.22353	0.000303208
ENSG00000183114	FAM43B	0.717303	1.32543	0.550004	0.720199	11.1621	11.4848	10.2607	13.7128	1.50889	1.3568	2.02283	1.75079	3.47074	4.23831	0.488384	1.57089	-2.98236	-2.66742	1.59114e-08
ENSG00000179981	TSHZ1	5.91211	5.09928	4.78844	5.54086	27.9214	31.5798	28.257	26.9136	7.13731	8.30763	8.5936	9.19264	2.43392	2.41716	0.488137	0.78402	-1.94579	-1.63314	1.84262e-10
ENSG00000160460	SPTBN4	0.149739	0.128172	0.113464	0.276484	10.3453	10.0177	10.781	11.9152	0.117711	0.270875	0.106918	0.079381	6.19518	5.86303	0.483613	-1.06566	-5.71157	-6.92869	1.32799e-10
ENSG00000159164	SV2A	28.2506	25.5072	26.6413	28.7172	122.723	111.291	123.481	120.552	34.8092	40.2308	34.8448	38.5021	2.12205	2.1402	0.481186	0.40593	-1.64086	-1.73427	4.56299e-11
ENSG00000257499	RP11-571M6.8	0.161974	0.224471	0.198714	0.513561	9.93059	11.3808	12.9616	16.1555	0.360765	0.177897	0.297897	0.0608223	5.78522	5.35329	0.479118	-0.989579	-5.3061	-6.34287	1.50867e-09
ENSG00000264672	RP11-112H10.4	0.195911	0.271503	0.600872	0.310582	1.80562	3.18858	2.68058	3.501	0.290902	0.358618	0.576501	0.514962	3.41748	2.76173	0.474673	0.260021	-2.94281	-2.50171	9.77595e-06
ENSG00000272449	RP3-395M20.12	1.03266	1.61	1.23523	1.17871	14.1522	17.4632	15.4141	20.4712	2.76007	0.907346	0.683726	0.232664	3.58056	3.89393	0.472768	-1.39736	-3.10779	-5.29128	1.50026e-06
ENSG00000111674	ENO2	11.4842	10.8378	9.7268	11.7464	353.001	337.25	359.454	363.316	14.261	16.6241	8.37785	8.25491	4.95059	5.07293	0.468446	-0.36851	-4.48214	-5.44144	2.15763e-10
ENSG00000110881	ASIC1	8.34285	7.61076	5.33725	5.99431	64.9543	65.0499	61.5967	68.2801	10.7664	11.2866	17.4446	14.1783	3.0266	3.51872	0.467095	1.48062	-2.55951	-2.0381	2.03544e-09
ENSG00000259143	CTD-2240H23.2	1.21208	0.179973	0.159322	0.494108	4.78762	5.15523	3.87687	6.2606	0.385666	1.52141	0.955375	0.780246	2.83645	3.95552	0.454151	1.40935	-2.3823	-2.54617	7.70844e-05
ENSG00000196867	ZFP28	3.85478	3.46932	3.47891	3.76498	15.3403	13.1916	16.2768	15.6886	5.09883	4.88259	5.73686	4.39241	1.96185	2.14168	0.446592	0.483693	-1.51526	-1.65798	3.0068e-09
ENSG00000269275	CTD-2105E13.15	0.752127	0.01	0.346023	0.01	5.19899	2.23927	4.44387	5.39194	0.418803	0.61955	1.24496	1.05911	3.28686	4.788	0.446195	2.69414	-2.84067	-2.09386	0.000214002
ENSG00000204758	CTC-308K20.1	0.554964	0.653731	0.817013	0.774221	2.53518	2.77581	3.03735	3.6902	1.11247	0.528252	1.0615	0.500143	2.13553	2.07993	0.440877	-0.027083	-1.69465	-2.10702	5.28541e-05
ENSG00000103034	NDRG4	4.17938	3.76774	3.87496	4.1478	132.169	126.018	134.382	146.126	5.68736	5.09377	5.85905	5.38076	5.02184	5.1278	0.440003	0.486447	-4.58184	-4.64135	2.88296e-15
ENSG00000254941	RP11-677M14.5	0.459167	0.477251	0.211244	2.40216	6.89987	6.01505	7.4249	5.72475	0.511351	0.756459	0.253345	0.258631	3.78574	2.33102	0.437116	-2.35178	-3.34863	-4.68281	5.63945e-05
ENSG00000267063	AC006130.3	0.370643	0.38524	0.170518	0.528829	4.4557	5.07609	6.22395	4.39001	0.206383	0.814159	0.409004	0.626305	3.65651	3.92381	0.433102	0.565982	-3.22341	-3.35783	9.46179e-07
ENSG00000113657	DPYSL3	57.6432	36.739	35.8391	44.1916	632.139	557.557	634.487	611.494	46.3351	80.8287	152.33	137.992	3.65593	3.96058	0.430101	1.85903	-3.22583	-2.10156	8.55314e-07
ENSG00000137094	DNAJB5	8.24084	8.00284	7.82352	8.91809	60.553	54.1435	55.5529	60.8847	10.7524	11.0644	14.9315	11.86	2.81987	2.79805	0.42556	0.678338	-2.39431	-2.11971	5.24708e-11
ENSG00000196415	PRTN3	0.629898	0.187059	0.496784	0.171187	21.3107	22.6116	29.5497	24.2333	0.400849	0.691822	0.992989	1.7233	5.74855	6.33122	0.419527	2.02378	-5.32902	-4.30744	2.63516e-09
ENSG00000227398	KIF9-AS1	1.36494	1.63696	1.66166	1.71778	6.26054	5.37668	6.34721	6.17871	1.77731	2.23715	1.57573	1.37204	1.9548	1.89006	0.419332	-0.19716	-1.53547	-2.08722	1.35769e-06
ENSG00000196967	ZNF585A	2.23774	1.93208	2.02631	2.06095	7.89954	8.0371	9.21933	8.25176	2.24154	3.31599	3.52764	2.56088	1.93429	2.09576	0.414457	0.574957	-1.51983	-1.52081	1.99592e-07
ENSG00000167306	MYO5B	0.0588294	0.0713374	0.135325	0.0932634	0.612924	0.38533	0.74396	0.647895	0.0655154	0.107688	0.140656	0.0994088	2.93905	2.60618	0.412105	0.0706712	-2.52694	-2.53551	6.9057e-06
ENSG00000170464	DNAJC18	10.2268	6.91085	8.05517	9.3361	43.1056	37.2536	43.4989	40.7579	10.9835	11.7885	9.22384	11.0926	2.2293	2.27643	0.4101	0.224287	-1.8192	-2.05214	8.91857e-10
ENSG00000184194	GPR173	8.39255	9.53508	10.6796	7.9617	79.4251	78.2564	81.9039	82.9015	10.6141	13.189	13.3745	10.8876	3.13676	3.14419	0.408966	0.380207	-2.72779	-2.76399	1.48698e-10
ENSG00000099338	CATSPERG	0.088638	0.115161	0.0713629	0.147546	3.10346	4.07722	4.72717	4.48952	0.135729	0.133859	0.171171	0.0998526	5.1389	5.39585	0.403605	0.30809	-4.7353	-5.08776	5.84401e-11
ENSG00000175426	PCSK1	0.0387614	0.01	0.01	0.0184348	9.69221	9.8323	8.36518	10.1244	0.0431667	0.021286	0.171093	0.109164	8.64533	9.34484	0.4025	3.30102	-8.24283	-6.04382	9.16496e-11
ENSG00000232186	RP11-311P8.2	0.0837568	0.348222	0.462397	0.239006	1.20826	1.09721	2.50039	2.40178	0.559655	0.01	0.184851	0.283061	2.41603	2.8051	0.399128	-0.584007	-2.0169	-3.38911	0.00140064
ENSG00000055163	CYFIP2	8.14292	5.34063	4.61975	5.43674	48.6864	47.3798	45.9934	44.6606	9.89674	7.87925	8.1541	12.2493	2.83283	3.17224	0.398729	1.02068	-2.4341	-2.15156	2.57356e-09
ENSG00000119782	FKBP1B	6.43983	4.01608	5.86898	6.94226	70.1912	61.7919	76.0601	73.3314	7.30833	6.46667	11.0994	8.70553	3.65796	3.54362	0.397733	0.628453	-3.26023	-2.91516	3.50802e-10
ENSG00000227908	CTD-2031P19.3	0.0898675	0.326924	0.206722	0.213703	1.40445	0.802675	1.22962	1.23248	0.450365	0.0987021	0.396675	0.0506188	2.40477	2.54997	0.397655	0.0893732	-2.00711	-2.4606	0.00143417
ENSG00000273419	RP4-751H13.7	1.9852	1.54101	1.47979	1.69708	9.78773	7.6312	7.50178	7.8952	1.98694	2.64955	1.94109	1.61358	2.30447	2.27697	0.394915	0.162109	-1.90955	-2.11486	1.59523e-07
ENSG00000258498	DIO3OS	0.440564	0.457916	1.04721	0.576209	8.67263	8.15422	9.59011	9.49799	0.102216	1.06856	0.0202568	0.01	4.22714	3.55557	0.381903	-5.74563	-3.84523	-9.3012	0.000136527
ENSG00000177108	ZDHHC22	0.0532643	0.0830431	0.0490095	0.126661	5.47473	5.04289	4.24026	3.88488	0.148295	0.0292503	0.0881657	0.210012	6.2698	5.53145	0.381319	0.763295	-5.88848	-4.76815	1.42888e-09
ENSG00000099308	MAST3	7.04725	5.65146	4.62566	5.7787	24.5392	23.2424	23.8039	25.147	6.2075	10.2756	4.05592	6.07392	1.91177	2.23415	0.376304	-0.0385765	-1.53547	-2.27272	1.34594e-05
ENSG00000182809	CRIP2	13.8018	14.6332	17.4616	17.7271	130.815	130.58	150.906	172.475	15.2281	21.6619	18.7558	9.30963	3.20049	3.20006	0.375561	-0.326315	-2.82493	-3.52637	8.42665e-08
ENSG00000144045	DQX1	0.0699683	0.109086	0.01	0.0332766	0.841127	1.33321	0.652738	1.2649	0.0779202	0.153693	0.270235	0.157641	3.6021	5.4696	0.371324	3.30553	-3.23078	-2.16406	2.18259e-05
ENSG00000132879	FBXO44	9.2151	9.51741	10.1963	10.0136	40.4907	42.9247	45.5595	52.2463	10.0675	14.1566	9.68616	9.78968	2.15477	2.27486	0.370902	-0.0533706	-1.78387	-2.32824	2.26075e-08
ENSG00000268225	CTD-2331H12.5	0.873283	0.201706	0.446403	0.553774	3.14946	1.73332	3.37946	2.41952	0.324178	1.0657	0.428297	0.437232	2.18338	2.53554	0.37064	-0.208601	-1.81274	-2.74414	0.000455781
ENSG00000268041	CTD-2575K13.6	0.145479	0.604833	0.267715	0.415134	7.86995	3.81152	7.6002	9.43167	0.486037	0.479341	0.963213	0.327769	3.96059	4.64052	0.363604	0.91883	-3.59698	-3.7217	7.38294e-07
ENSG00000112137	PHACTR1	0.218089	0.188899	0.211816	0.299643	5.27267	4.51629	4.44591	4.01818	0.229382	0.292758	0.0802205	0.040947	4.5881	4.04866	0.35945	-2.07762	-4.22865	-6.12628	2.97598e-08
ENSG00000132639	SNAP25	0.735323	0.668748	0.592012	0.845149	33.2963	29.2994	36.7003	34.4174	0.921255	0.874912	0.0338095	0.0690298	5.47837	5.62892	0.355305	-3.80476	-5.12307	-9.43367	1.10186e-07
ENSG00000186952	TMEM232	0.121349	0.105107	0.139569	0.067332	0.3647	0.529887	0.490564	0.529529	0.0563085	0.233237	0.0334771	0.0683511	1.98199	2.30169	0.354562	-1.02281	-1.62743	-3.32449	0.00121147
ENSG00000134313	KIDINS220	29.5789	22.9301	25.8669	28.4266	102.77	94.9997	102.862	96.6213	30.9148	36.1462	34.3404	31.8471	1.91319	1.87742	0.352909	0.285781	-1.56028	-1.59164	5.50087e-10
ENSG00000152061	RABGAP1L	5.73534	5.00931	4.43451	4.76278	20.9009	19.4447	23.0829	20.1323	6.48749	7.21437	6.37037	5.93667	1.90879	2.23226	0.350753	0.420203	-1.55804	-1.81206	1.18657e-09
ENSG00000138079	SLC3A1	7.98326	7.18477	7.4035	8.52222	29.2267	26.5716	29.6338	26.7777	9.48678	9.8403	7.41946	7.21948	1.87919	1.82463	0.34959	-0.121548	-1.5296	-1.94618	3.01895e-08
ENSG00000261338	RP11-378A13.1	1.3573	1.61976	1.15637	1.53014	6.40588	4.90911	6.19048	6.20489	1.90345	1.87722	2.16346	1.86881	1.92627	2.206	0.344752	0.585861	-1.58152	-1.62014	8.25749e-07
ENSG00000224812	TMEM72-AS1	0.093503	0.0971856	0.200746	0.0592929	0.899241	0.482529	0.58153	0.544025	0.13884	0.102695	0.103181	0.245777	2.85723	2.11384	0.341012	0.424326	-2.51621	-1.68951	0.000473499
ENSG00000116675	DNAJC6	4.31844	4.47304	4.43934	4.75923	44.3957	36.4787	41.1946	37.1688	6.9651	4.15419	3.08929	2.88534	3.2015	3.0907	0.338886	-0.62256	-2.86262	-3.71326	6.33983e-08
ENSG00000184271	POU6F1	2.18655	2.00634	1.82327	2.03109	10.9045	9.7242	10.1567	10.2869	2.20677	3.09569	3.41193	3.71404	2.29863	2.40709	0.338716	0.886596	-1.95992	-1.52049	2.33334e-08
ENSG00000106772	PRUNE2	0.22932	0.325025	0.230183	0.317276	5.56368	4.84954	5.96421	5.28498	0.278599	0.419773	0.260722	0.211364	4.23149	4.36093	0.333212	-0.213701	-3.89828	-4.57463	1.65839e-10
ENSG00000099866	MADCAM1	1.09553	0.569338	1.51203	1.00198	3.29249	2.91041	3.30193	3.83495	1.03234	1.06439	1.02293	0.664535	1.89754	1.5053	0.332736	-0.575131	-1.5648	-2.08044	0.000196435
ENSG00000165646	SLC18A2	5.31097	5.70156	5.89619	4.88574	31.0838	29.6347	32.9379	29.626	7.2752	6.5451	5.06273	8.08959	2.46299	2.53672	0.327643	0.286701	-2.13535	-2.25001	3.9919e-09
ENSG00000250222	CTC-338M12.5	2.75122	1.53977	1.16836	2.01303	7.88686	7.561	7.37084	9.49884	2.82822	2.55681	3.73658	1.66886	1.84802	2.4067	0.327642	0.764753	-1.52038	-1.64195	0.000135733
ENSG00000163644	PPM1K	2.30653	2.17174	2.07235	1.99607	19.7468	20.1328	21.0284	19.2053	2.60897	3.01014	2.62511	2.60855	3.15464	3.30586	0.327397	0.363351	-2.82724	-2.94251	1.70012e-12
ENSG00000273025	CELF6	7.787	7.41922	8.95621	8.48712	87.046	75.2189	84.2822	84.0737	8.55156	10.5125	11.7556	10.8434	3.41562	3.27077	0.326192	0.373588	-3.08942	-2.89718	1.11617e-11
ENSG00000116661	FBXO2	1.9398	1.32886	1.86597	2.72575	19.4505	17.0108	21.3319	24.1298	2.11116	1.98523	2.52976	0.943619	3.4796	3.30755	0.325658	-0.402696	-3.15394	-3.71024	2.79627e-08
ENSG00000167968	DNASE1L2	0.890708	0.389806	0.345077	0.579687	2.14154	3.18224	2.9156	2.98084	0.626487	0.978271	0.569045	1.10902	2.05573	2.67269	0.325634	0.859644	-1.73009	-1.81304	5.06685e-05
ENSG00000248341	AC115115.2	1.416	2.80975	1.65823	2.93867	10.0588	9.65802	8.80666	12.037	3.01051	2.26212	1.70461	2.0302	2.22215	2.18088	0.319315	-0.299626	-1.90283	-2.4805	1.31666e-05
ENSG00000131187	F12	0.297157	0.46329	0.375952	0.176658	15.6734	13.713	15.7091	15.653	0.703224	0.244777	0.737802	1.08795	5.27216	5.82662	0.318041	1.72416	-4.95412	-4.10246	1.68014e-09
ENSG00000133872	TMEM66	113.555	86.2315	100.368	113.872	387.69	354.023	398.534	371.361	123.893	124.87	135.029	123.852	1.8924	1.84544	0.316311	0.273061	-1.57609	-1.57237	3.00719e-10
ENSG00000103723	AP3B2	0.0410647	0.0569093	0.0251896	0.156242	16.4718	14.2311	14.2341	14.6085	0.106707	0.0150339	0.151049	0.0462602	8.29176	7.31264	0.313347	0.121039	-7.97841	-7.1916	9.44116e-11
ENSG00000154556	SORBS2	1.38941	1.16936	0.837198	0.970731	10.5243	8.9322	9.95658	10.225	1.38985	1.78259	1.37718	1.57905	2.92673	3.48063	0.310137	0.709421	-2.61659	-2.77121	2.22863e-10
ENSG00000260837	RP11-434B12.1	0.927203	0.963721	0.792199	1.13393	7.56364	8.04495	7.90851	10.2389	1.10634	1.23657	0.877001	1.04451	3.04518	3.23599	0.30921	-0.00346296	-2.73597	-3.23945	4.63205e-09
ENSG00000130224	LRCH2	9.31802	6.94888	9.0735	9.71775	70.1236	67.0787	72.1154	68.6886	7.14292	12.9188	7.58502	6.5194	3.07629	2.90556	0.302504	-0.413914	-2.77379	-3.31947	1.7288e-08
ENSG00000242255	RPL39P34	1.31863	3.42642	3.03325	1.25427	10.3038	10.2074	13.1217	11.5082	3.67124	2.1724	0.727555	4.4564	2.11191	2.5222	0.300444	0.27391	-1.81147	-2.24829	0.00124174
ENSG00000147402	GABRQ	0.0333182	0.0865761	0.0459851	0.0950761	1.88252	1.46811	1.90641	1.20466	0.0742097	0.0731873	0.4412	0.262736	4.8046	4.46302	0.297944	2.31912	-4.50665	-2.1439	3.72906e-06
ENSG00000196693	ZNF33B	6.28376	5.93912	6.67131	5.79644	30.4652	27.8364	34.6146	31.8541	7.20939	7.73574	8.89625	8.84848	2.25395	2.41448	0.290091	0.509189	-1.96386	-1.90529	3.69657e-10
ENSG00000118402	ELOVL4	5.10547	4.1117	4.72876	5.94976	42.3939	40.3462	47.1456	43.1242	5.38449	5.86733	8.35756	6.77983	3.16619	3.07953	0.287761	0.503405	-2.87843	-2.57613	1.61344e-10
ENSG00000261115	TMEM178B	0.348721	0.372524	0.632817	0.497551	13.4732	10.7515	11.9888	9.11819	0.442292	0.436198	0.652045	0.436491	5.06984	4.22286	0.284536	-0.054404	-4.78531	-4.27726	1.23392e-10
ENSG00000182450	KCNK4	0.039078	0.0406171	0.0719129	0.148683	0.704667	0.651533	0.53469	0.682098	0.0870385	0.01	0.0862451	0.0440222	4.08894	2.4636	0.284067	-0.759929	-3.80487	-3.22353	3.78339e-05
ENSG00000265611	MIR5010	12.8567	16.0356	18.1388	17.9361	77.2785	102.074	92.7541	107.931	15.2724	19.7688	20.8081	23.1733	2.63404	2.47586	0.278366	0.285896	-2.35567	-2.18997	2.06648e-07
ENSG00000155066	PROM2	0.407138	0.335012	0.608751	0.419539	1.8762	1.79803	1.83581	1.98813	0.415626	0.484427	0.280798	0.114663	2.30766	1.89481	0.278297	-1.37864	-2.02936	-3.27345	3.53153e-05
ENSG00000153815	CMIP	27.5553	22.5525	24.2243	26.6659	163.458	150.463	166.458	156.741	32.6151	28.1333	29.3774	33.7114	2.6473	2.66697	0.277812	0.309997	-2.36949	-2.35697	8.13352e-13
ENSG00000224728	AC090945.1	0.01	0.420607	0.68263	0.513224	1.62158	2.73089	3.10404	2.27038	0.22533	0.296301	0.372127	0.607824	3.33739	2.16807	0.276658	-0.28726	-3.06073	-2.45533	0.000679515
ENSG00000166848	TERF2IP	59.143	58.2769	52.5981	58.6884	322.708	303.701	335.081	327.778	69.2884	72.847	71.008	62.3395	2.41543	2.57442	0.275589	0.260912	-2.13984	-2.31351	6.52218e-12
ENSG00000272373	ZNF33B	1.3909	1.21741	0.740933	1.25338	6.95231	7.84622	8.24076	7.80359	1.42669	1.72864	1.49447	1.56688	2.50427	3.0081	0.274673	0.618272	-2.22959	-2.38983	1.73033e-08
ENSG00000166257	SCN3B	0.076075	0.0338876	0.0199994	0.0310123	48.5489	40.4325	45.4754	43.4403	0.0968239	0.0358087	0.0239853	0.146914	9.66035	10.7674	0.270423	1.74425	-9.38992	-9.02314	3.70731e-13
ENSG00000111490	TBC1D30	0.353017	0.284068	0.356252	0.519929	1.4648	1.64095	1.41648	1.56176	0.393138	0.375215	0.339289	0.192427	2.28538	1.76516	0.270282	-0.720573	-2.0151	-2.48573	4.40015e-06
ENSG00000131089	ARHGEF9	17.1859	14.4344	14.7069	15.5114	93.1094	79.297	90.8191	91.8952	18.1092	19.9927	16.6174	17.5718	2.44689	2.5961	0.269012	0.178122	-2.17788	-2.41797	8.51447e-12
ENSG00000180549	FUT7	0.0398039	0.0413716	0.01	0.01	1.19626	0.900649	1.28729	0.992526	0.01	0.0874339	0.01	0.13452	4.69108	6.83277	0.263379	2.8532	-4.4277	-3.97958	3.53276e-06
ENSG00000137817	PARP6	11.1995	11.5572	13.5021	13.0173	71.2858	62.772	67.1269	63.7839	12.1449	15.1481	16.606	15.8835	2.55849	2.30347	0.262237	0.292923	-2.29626	-2.01054	6.35926e-10
ENSG00000079841	RIMS1	0.0642833	0.0918708	0.096116	0.0764323	1.04326	1.1866	1.04948	0.881611	0.107384	0.0794282	0.283746	0.253458	3.83591	3.48434	0.258617	1.63847	-3.5773	-1.84587	1.2151e-06
ENSG00000254295	CTC-308K20.2	0.841336	1.31171	1.93532	1.20041	3.79281	6.76315	6.2791	7.08043	2.10815	0.462023	1.39262	0.236946	2.29361	2.09099	0.255487	-0.944314	-2.03812	-3.03531	0.000893623
ENSG00000160097	FNDC5	7.33965	8.37797	9.28586	10.2228	69.0903	75.0382	81.3105	98.535	2.80975	15.9065	25.021	9.52327	3.1969	3.20457	0.251905	0.824335	-2.945	-2.38024	0.000157073
ENSG00000272256	RP11-489E7.4	72.5768	55.4095	58.6485	71.9282	248.162	210.128	231.187	228.835	70.8229	81.4618	87.4419	73.9261	1.84027	1.81681	0.250782	0.305457	-1.58949	-1.51135	7.41453e-09
ENSG00000266620	MIR5001	8.22827	3.20713	5.67824	14.675	21.0198	19.5981	34.5429	29.4939	3.43628	10.1668	2.26997	6.95199	1.82861	1.65364	0.250429	-1.14211	-1.57818	-2.79576	0.00421437
ENSG00000157680	DGKI	0.390323	0.275048	0.371318	0.283174	6.32265	5.48349	6.21292	6.32635	0.486256	0.305172	0.335816	0.342822	4.14924	4.25993	0.250301	0.0522692	-3.89894	-4.20767	1.34697e-11
ENSG00000172568	FNDC9	0.0450124	0.0467852	0.0414168	0.01	16.2336	11.954	17.0209	16.6115	0.01	0.0988749	0.01	0.101415	8.26239	9.3534	0.246143	1.11563	-8.01624	-8.23777	6.71575e-11
ENSG00000176920	FUT2	0.27387	0.379542	0.895975	0.318392	1.75591	1.52204	2.80098	2.16253	0.440549	0.334215	0.235056	0.41136	2.32673	2.03116	0.245765	-0.909669	-2.08097	-2.94083	0.000152892
ENSG00000127366	TAS2R5	0.804939	1.11552	1.2344	0.34029	2.36539	4.15395	3.89373	3.79128	1.19523	1.08053	0.690861	1.00753	1.76327	2.28698	0.244895	0.109105	-1.51838	-2.17787	0.000757349
ENSG00000168676	KCTD19	0.181104	0.144798	0.230729	0.159014	0.653146	0.895891	1.19567	1.47635	0.232716	0.153006	0.322832	0.172631	2.24886	2.77734	0.243123	0.346254	-2.00574	-2.43108	1.47978e-05
ENSG00000121671	CRY2	6.42107	5.93242	5.67916	7.29134	26.3886	25.6872	26.9123	23.7479	6.5226	8.07281	8.89826	6.03724	2.07569	1.96562	0.240595	0.203513	-1.8351	-1.76211	3.13731e-08
ENSG00000086717	PPEF1	0.0292613	0.0608274	0.107695	0.0278331	1.75883	1.35904	2.11105	1.86058	0.01	0.0964136	0.01	0.01	5.11307	4.87306	0.240265	-2.76052	-4.87281	-7.63359	2.43086e-07
ENSG00000261342	AC006538.1	0.584025	0.202342	0.119416	0.308622	2.10627	2.78207	3.71299	4.04525	0.144533	0.783982	0.286432	0.584815	2.63607	4.17992	0.239721	1.02534	-2.39635	-3.15458	2.4132e-05
ENSG00000254782	RP11-155D18.12	53.401	45.146	48.0972	53.8352	185.581	185.188	206.523	237.714	56.1197	60.0963	52.7032	50.6254	1.91164	2.12372	0.237925	0.0196269	-1.67371	-2.10409	1.99767e-09
ENSG00000144596	GRIP2	0.28114	0.237423	0.291018	0.225634	9.38933	8.87247	7.74811	8.32477	0.254387	0.357025	0.426577	0.504757	5.13817	4.95929	0.237626	0.850106	-4.90054	-4.10919	8.57965e-12
ENSG00000064687	ABCA7	3.89773	3.85954	4.57065	5.39165	25.8525	23.1212	27.3309	29.0501	2.35521	6.77923	7.354	4.19696	2.65839	2.50066	0.235767	0.213462	-2.42262	-2.2872	1.33118e-05
ENSG00000236031	RP11-269F20.1	4.10866	1.42349	1.76421	2.08433	16.2995	10.6015	16.0134	10.5866	3.20293	3.30922	2.11582	5.3999	2.28175	2.78904	0.235293	0.965599	-2.04646	-1.82344	4.91441e-05
ENSG00000158856	DMTN	0.661216	0.710957	0.944066	1.01932	110.105	94.9277	108.68	106.857	0.837932	0.776303	0.62901	1.25858	7.22325	6.77844	0.234388	-0.0567998	-6.98886	-6.83524	1.29537e-13
ENSG00000131620	ANO1	0.272775	0.194919	0.219613	0.340544	1.6191	1.3603	1.86614	1.97676	0.208846	0.33704	0.0376259	0.0192054	2.67138	2.77829	0.223035	-3.30107	-2.44835	-6.07936	3.85477e-05
ENSG00000151067	CACNA1C	1.05809	0.735701	0.798996	1.04809	3.79841	3.51953	3.24947	3.73012	0.698877	1.39453	0.555616	0.394579	2.02843	1.91789	0.222841	-0.958956	-1.80559	-2.87685	8.65868e-05
ENSG00000059728	MXD1	9.22605	7.93198	8.08482	9.24007	36.5401	31.9543	34.1448	32.2767	9.9303	9.99007	8.99585	10.5217	1.9971	1.9388	0.21536	0.171922	-1.78174	-1.76688	1.46926e-10
ENSG00000102053	ZC3H12B	0.453598	0.265198	0.508663	0.310111	1.46548	1.60369	1.81608	2.13842	0.520936	0.311369	0.15642	0.255494	2.0942	2.27196	0.21153	-0.991121	-1.88267	-3.26308	2.04491e-05
ENSG00000133318	RTN3	58.9027	49.6684	55.5864	59.7101	229.914	218.14	243.99	223.547	61.0881	64.2252	60.1394	67.5354	2.04503	2.01973	0.2069	0.147126	-1.83813	-1.87261	1.80686e-11
ENSG00000266916	CTD-3064H18.1	1.16967	1.29679	1.65023	1.3351	8.15555	8.17207	10.4755	10.6943	1.38945	1.45595	0.602343	0.439221	2.7268	2.82604	0.206186	-1.51914	-2.52061	-4.34518	7.66911e-07
ENSG00000138078	PREPL	33.6074	29.3846	30.029	31.8351	113.348	103.483	114.74	100.898	34.9121	37.5902	32.6728	30.0858	1.78333	1.80144	0.20286	0.020708	-1.58047	-1.78073	1.94019e-09
ENSG00000152377	SPOCK1	1.23277	0.519457	0.889045	0.617995	28.1978	23.6287	26.8762	20.3754	0.68644	1.31737	2.15085	2.32709	4.88642	4.97058	0.193554	1.57112	-4.69287	-3.39946	3.69063e-08
ENSG00000177888	ZBTB41	5.76613	5.56871	6.0682	5.81607	24.7233	23.8911	26.9112	25.6708	6.63551	6.31979	7.62225	7.02344	2.10062	2.14552	0.192778	0.301424	-1.90784	-1.84409	1.0176e-10
ENSG00000122367	LDB3	0.261792	0.112042	0.184202	0.366197	3.83211	4.43811	4.84623	5.5487	0.308694	0.118394	0.15294	0.173479	4.46746	4.23926	0.192137	-0.753755	-4.27532	-4.99301	3.98621e-09
ENSG00000129757	CDKN1C	58.1086	53.9895	56.6873	67.9083	302.803	313.278	368.276	399.282	35.5233	92.4772	24.7976	15.2338	2.45836	2.62302	0.191388	-1.63805	-2.26697	-4.26107	0.000170784
ENSG00000196876	SCN8A	4.2109	2.86634	4.01128	3.0865	13.0623	11.829	12.5503	12.178	4.0918	3.94474	1.00224	1.49751	1.81438	1.80072	0.183386	-1.50559	-1.631	-3.30631	0.000974528
ENSG00000267199	RP11-861E21.2	6.80257	5.57367	5.05616	5.80367	19.499	20.5576	23.0984	21.2149	7.89222	6.13938	6.67024	6.93747	1.69447	2.02874	0.181107	0.325423	-1.51336	-1.70331	4.70265e-09
ENSG00000121753	BAI2	15.7441	14.0087	13.5841	13.4756	64.0931	55.9175	62.427	64.0594	14.5817	19.1113	13.4689	11.4657	2.01207	2.22477	0.179421	-0.117992	-1.83264	-2.34276	2.67514e-08
ENSG00000151746	BICD1	6.76093	6.21114	5.4583	6.01604	24.6557	23.8431	25.9129	25.4185	8.20938	6.45786	8.69289	8.16667	1.90254	2.16143	0.177189	0.555155	-1.72535	-1.60627	5.51829e-10
ENSG00000189143	CLDN4	0.153414	0.296134	0.302485	0.104233	1.44907	2.00972	2.04459	2.32259	0.122036	0.385134	0.338585	0.271581	2.94372	3.4246	0.173994	0.585175	-2.76973	-2.83943	4.61365e-06
ENSG00000119866	BCL11A	0.757919	0.800684	0.937456	0.732745	18.9247	19.443	17.5415	17.7682	0.788709	0.968892	1.94694	2.51944	4.62157	4.40197	0.173354	1.41909	-4.44822	-2.98288	2.82881e-08
ENSG00000261015	RP1-90J20.11	0.390335	0.567992	0.502817	0.594054	1.97082	2.46371	3.69001	2.28729	0.521637	0.557321	0.215367	0.747526	2.21019	2.4461	0.171048	-0.187947	-2.03914	-2.63405	2.90219e-05
ENSG00000172375	C2CD2L	4.63253	4.54813	4.75549	4.05604	15.9019	14.7693	15.8984	15.5457	5.22118	5.1002	4.80404	5.63362	1.74022	1.83532	0.168967	0.244335	-1.57125	-1.59099	3.77271e-09
ENSG00000064692	SNCAIP	0.182538	0.218916	0.155037	0.120205	9.79037	9.53151	8.61062	9.40094	0.203284	0.246749	0.0309894	0.01	5.58885	6.03208	0.164792	-2.74738	-5.42406	-8.77946	2.91568e-08
ENSG00000249786	EAF1-AS1	7.78988	6.05856	6.352	7.71629	23.5408	22.3607	22.6537	23.2088	7.68803	7.81813	7.82544	8.07948	1.72882	1.70487	0.163118	0.177028	-1.5657	-1.52784	2.05456e-09
ENSG00000231721	LINC-PINT	0.888434	1.1602	1.08995	1.08343	8.37997	7.05359	7.79238	7.41288	0.938667	1.35107	0.829558	0.513251	2.91334	2.80656	0.16052	-0.694686	-2.75282	-3.50124	7.05674e-08
ENSG00000272762	RP11-155D18.14	111.44	92.4255	99.0268	109.631	465.908	466.092	505.338	580.504	107.742	119.881	93.4942	93.725	2.19271	2.3796	0.159027	-0.156413	-2.03368	-2.53601	3.73278e-10
ENSG00000171804	WDR87	0.01	0.01	0.01	0.01	0.241942	0.199731	0.292061	0.209101	0.01	0.0122801	0.01	0.0125956	4.4649	4.6472	0.155756	0.176039	-4.30915	-4.47117	4.05305e-06
ENSG00000184349	EFNA5	14.4587	9.73733	11.4103	11.8986	44.3544	50.9042	51.8438	45.3479	11.8201	15.0672	14.9791	11.4484	1.97708	2.05995	0.15216	0.181155	-1.82492	-1.87879	1.91849e-08
ENSG00000163703	CRELD1	17.5597	18.5342	20.2651	19.836	63.001	58.8449	65.8308	65.1015	17.524	22.5451	14.1197	17.7265	1.75523	1.70711	0.150736	-0.332518	-1.6045	-2.03963	1.58344e-07
ENSG00000101290	CDS2	19.4499	14.5799	16.2649	18.1715	58.262	51.4856	57.6484	54.2675	17.9716	19.6522	16.424	16.8251	1.68932	1.70041	0.144851	-0.0506171	-1.54447	-1.75102	2.79377e-09
ENSG00000141098	GFOD2	10.3729	8.8593	9.13493	9.93279	32.3281	29.525	33.1905	33.3891	10.344	10.904	9.98886	10.4635	1.68532	1.80395	0.143799	0.101138	-1.54152	-1.70281	1.45122e-10
ENSG00000205869	KRTAP5-1	0.109186	0.01	0.100464	0.01	31.5021	27.6964	31.2372	35.1215	0.121595	0.01	0.240974	0.123001	8.9562	9.23056	0.142891	1.72026	-8.81331	-7.51031	2.45093e-11
ENSG00000109163	GNRHR	0.237646	0.0494012	0.01	0.090419	0.799925	0.679232	0.768566	0.829612	0.264655	0.0522018	0.104897	0.107085	2.36541	3.99232	0.142542	1.07791	-2.22287	-2.91441	0.000574637
ENSG00000125650	PSPN	1.89349	1.80406	2.03261	2.00119	6.8288	6.42038	7.13122	7.77079	1.72795	2.33959	1.8573	2.04418	1.84126	1.88529	0.137587	-0.0481182	-1.70367	-1.93341	1.3e-07
ENSG00000268707	RP11-247A12.7	0.202867	0.01	0.373323	0.192965	3.41428	5.07348	3.53277	5.05856	0.01	0.22281	0.01	0.228533	5.31736	3.92327	0.129203	-1.24734	-5.18816	-5.17062	2.49328e-06
ENSG00000265126	CTB-187M2.2	0.181399	0.01	0.166909	0.01	5.45175	6.91292	3.61021	5.42791	0.01	0.199232	0.600522	0.01	6.01349	5.67494	0.12852	1.78704	-5.88497	-3.88791	2.77818e-06
ENSG00000273356	RP11-804H8.6	0.449359	0.259476	0.137821	0.189968	1.74064	1.66489	2.54631	2.42774	0.500429	0.274186	0.275482	0.506213	2.26436	3.92358	0.128029	1.25384	-2.13633	-2.66974	5.75486e-06
ENSG00000173991	TCAP	1.01739	0.402842	1.06985	0.691239	8.79439	9.46212	10.7869	10.5704	0.647439	0.904568	0.427691	0.764075	3.68421	3.60019	0.128008	-0.563368	-3.5562	-4.16356	1.07399e-08
ENSG00000163686	ABHD6	4.67124	4.49778	3.53341	5.0157	21.0842	18.3272	18.5007	20.5447	4.50001	5.50817	2.94103	4.29374	2.10377	2.19131	0.126338	-0.240825	-1.97743	-2.43213	1.24153e-07
ENSG00000205929	C21orf62	0.0748569	0.025935	0.0229591	0.118672	15.5682	12.0349	14.8049	15.4927	0.0277881	0.0822159	0.01	0.0281093	8.0973	7.74092	0.126176	-1.89393	-7.97113	-9.63484	1.44624e-11
ENSG00000259495	RP11-210M15.2	0.13069	0.01	0.721504	0.01	2.19954	2.64587	2.43844	2.28117	0.01	0.143538	0.01	0.01	5.10602	2.68973	0.126074	-5.19279	-4.97995	-7.88252	0.000121124
ENSG00000116254	CHD5	0.0623984	0.032428	0.019138	0.0296764	1.8003	1.74629	1.53938	1.3355	0.0463267	0.0571105	0.0803327	0.0702931	5.225	5.88005	0.125395	1.62559	-5.09961	-4.25446	2.72816e-10
ENSG00000237977	EIF4HP2	1.09613	0.569649	1.00857	1.39017	2.63543	4.13371	2.49965	4.32763	0.813803	1.00324	0.604788	0.205802	2.02278	1.50903	0.125395	-1.56523	-1.89738	-3.07427	0.00107737
ENSG00000067191	CACNB1	4.69756	4.77708	4.98934	4.33037	38.624	37.6581	40.0907	40.9432	4.82778	5.49377	7.16766	5.60223	3.0092	3.12017	0.123516	0.454389	-2.88569	-2.66578	4.53362e-11
ENSG00000105649	RAB3A	7.75077	9.05569	5.77819	7.26485	383.383	379.525	384.162	375.886	7.24555	11.0603	4.37013	6.75569	5.50442	5.86474	0.123292	-0.229368	-5.38113	-6.09411	7.57453e-11
ENSG00000229956	ZRANB2-AS2	0.0899225	0.0560784	0.0165479	0.0513202	0.821565	0.706787	0.581632	0.762366	0.0600854	0.0987626	0.158767	0.141819	3.38793	4.30765	0.121669	2.14698	-3.26626	-2.16068	1.35451e-06
ENSG00000158525	CPA5	0.168171	0.174794	0.154737	0.0319926	0.768236	0.8011	1.17143	0.754813	0.262197	0.110822	0.0371153	0.113669	2.19402	3.36676	0.121188	-0.308468	-2.07283	-3.67523	0.000150504
ENSG00000185519	FAM131C	0.423265	0.439935	0.389454	0.632667	35.0366	31.1801	34.5978	38.6739	0.606046	0.332054	0.333623	0.4087	6.26136	6.16362	0.120047	-0.461447	-6.14131	-6.62506	6.88507e-13
ENSG00000165591	FAAH2	0.203771	0.158847	0.28124	0.242282	2.08219	1.51669	2.40792	1.65136	0.170197	0.223803	0.01	0.057388	3.31103	2.9549	0.119746	-2.95769	-3.19128	-5.91259	3.7252e-06
ENSG00000197653	DNAH10	0.463191	0.338304	0.472265	0.351276	3.58175	2.84007	3.25447	3.21522	0.320653	0.549974	0.379894	0.408974	3.00222	2.97379	0.11936	-0.0620569	-2.88286	-3.03584	3.85887e-09
ENSG00000115271	GCA	0.392999	0.3793	0.516579	0.240311	8.20029	6.51889	7.26278	7.62967	0.468925	0.369971	0.0619534	0.0632459	4.2524	4.29835	0.119334	-2.59586	-4.13306	-6.89421	9.16664e-08
ENSG00000267934	CTB-176F20.3	0.260439	0.229051	0.387102	0.152448	0.891096	0.691889	1.29581	1.87331	0.245417	0.286042	0.110536	0.157979	1.6933	2.55426	0.11868	-1.00675	-1.57462	-3.56101	0.000187449
ENSG00000259840	LA16c-380A1.1	0.230613	0.239696	0.424383	0.219357	7.20804	10.7109	7.74505	8.91315	0.256822	0.253284	0.508962	0.779371	5.25173	4.69361	0.11719	1.00096	-5.13454	-3.69265	3.58057e-08
ENSG00000255735	AC110619.1	0.123399	0.128259	0.283855	0.469506	1.55762	1.76348	1.61168	1.30773	0.0687119	0.203296	0.01	0.01	3.72212	1.95426	0.112178	-5.23527	-3.60994	-7.18953	4.55414e-05
ENSG00000235117	RP11-229P13.20	0.295132	0.306755	0.01	0.01	5.6767	3.69046	6.24081	3.86359	0.164337	0.486218	0.488516	0.498708	3.96005	8.98077	0.112178	5.62531	-3.84787	-3.35546	2.28003e-06
ENSG00000268751	SCGB1B2P	1.00182	1.38837	0.614528	0.635281	7.42676	6.36303	5.39992	6.66153	1.11568	1.46707	1.47401	0.37619	2.52841	3.27062	0.111785	0.565971	-2.41662	-2.70465	1.53183e-05
ENSG00000227210	AC079145.4	0.380234	0.790419	0.699722	0.723352	7.54215	4.07539	5.43908	3.79251	0.846896	0.417614	0.629382	0.428342	3.31092	2.69757	0.111265	-0.428047	-3.19965	-3.12562	5.6697e-06
ENSG00000177511	ST8SIA3	0.00852282	0.01	0.00784201	0.0648547	15.1637	13.3369	15.5415	13.2931	0.01	0.01	0.01	0.01	10.5875	8.6317	0.110697	-1.86189	-10.4768	-10.4936	1.85661e-09
ENSG00000120645	IQSEC3	1.67274	2.15589	2.35177	2.5203	14.961	13.562	14.7145	15.3494	2.30993	1.82248	0.132902	0.1206	2.89723	2.62543	0.110158	-4.26446	-2.78707	-6.88989	0.000648095
ENSG00000180720	CHRM4	0.280254	0.291292	0.451268	0.533152	2.69527	2.75348	4.61897	3.66883	0.0780264	0.53866	0.386576	0.0789281	3.25298	3.07364	0.109665	-1.08048	-3.14332	-4.15412	5.93824e-06
ENSG00000110786	PTPN5	0.0374216	0.01	0.0172162	0.0533928	2.38429	2.5848	1.93173	2.19284	0.01	0.0411005	0.01	0.01	6.71129	5.86825	0.107791	-1.81985	-6.6035	-7.6881	5.87458e-09
ENSG00000129472	RAB2B	24.1036	24.046	27.3426	26.4502	121.865	116.822	138.391	142.94	24.0508	27.7874	29.8366	25.0349	2.30952	2.38679	0.106492	0.0286428	-2.20303	-2.35814	1.85835e-10
ENSG00000215018	COL28A1	0.0776955	0.0969067	0.085787	0.162587	0.597773	0.555167	0.695833	0.697452	0.0173051	0.170667	0.154327	0.0175051	2.72317	2.4879	0.106449	-0.531521	-2.61672	-3.01942	0.000224026
ENSG00000205744	DENND1C	0.0441715	0.0688668	0.0203215	0.0630234	4.19498	4.39243	3.76365	3.88255	0.0245958	0.0970278	0.0731148	0.223921	6.24734	6.51951	0.105612	1.83347	-6.14173	-4.68604	1.48739e-09
ENSG00000239268	RP11-384F7.2	0.185656	0.385936	0.170826	0.176594	16.5158	14.5925	15.7034	16.2029	0.206756	0.407814	1.02436	0.209145	5.76617	6.52102	0.104593	1.82801	-5.66158	-4.69301	2.38917e-09
ENSG00000185666	SYN3	0.0189522	0.01	0.0174382	0.0360543	2.98463	2.25702	2.31026	2.6937	0.0211061	0.01	0.01	0.02135	7.5002	6.54759	0.103526	-0.770872	-7.39668	-7.31846	4.16366e-10
ENSG00000249937	RP11-454P21.1	0.01	0.0864921	0.0765674	0.01	7.00258	4.85593	5.07192	4.56498	0.0926721	0.01	0.01	0.01	6.9413	6.7986	0.0895621	-2.11382	-6.85173	-8.91243	1.10485e-08
ENSG00000170231	FABP6	0.263276	0.01	0.645989	0.584329	4.64198	5.33012	4.69392	3.82952	0.0977327	0.192772	0.0968418	0.197724	5.18946	2.79241	0.0882022	-2.06237	-5.10126	-4.85477	1.44466e-06
ENSG00000248508	SRP14-AS1	1.79777	1.79671	2.13133	2.40062	6.94078	6.54643	7.74071	7.06905	1.50157	2.31625	1.83124	1.47998	1.90774	1.70835	0.0869644	-0.45277	-1.82077	-2.16112	1.46559e-06
ENSG00000184905	TCEAL2	0.01	0.0641682	0.170415	0.01	1.63278	1.24988	1.30548	1.38549	0.0687531	0.01	0.136253	0.01	5.28045	3.89873	0.0865369	-0.302858	-5.19392	-4.20159	1.42765e-05
ENSG00000072818	ACAP1	0.318775	0.374546	0.369827	0.435049	1.93274	1.91465	2.67217	2.59199	0.262394	0.471891	0.581181	0.343493	2.47229	2.70937	0.0828165	0.20018	-2.38947	-2.50919	5.39182e-07
ENSG00000204681	GABBR1	21.3235	22.8071	24.8158	20.9874	96.1282	83.2399	90.9906	87.8564	21.2317	25.367	28.0463	23.6658	2.02307	1.96521	0.0785089	0.175055	-1.94456	-1.79015	5.8647e-09
ENSG00000092096	SLC22A17	15.7237	12.7695	15.795	14.9792	143.444	132.91	144.146	150.896	12.8787	17.1639	31.3859	25.0259	3.27783	3.26113	0.0763872	0.874276	-3.20144	-2.38685	5.36624e-08
ENSG00000188039	NWD1	0.0121433	0.01	0.01	0.01	0.350354	0.260306	0.302094	0.302797	0.01	0.013337	0.01	0.01	4.78543	4.9186	0.0757537	0	-4.70967	-4.9186	2.75253e-07
ENSG00000120328	PCDHB12	0.54007	0.28067	0.496929	0.285395	3.49872	2.2511	2.87372	3.62857	0.568036	0.296582	0.264874	0.2366	2.80852	3.05511	0.0751357	-0.64159	-2.73338	-3.6967	6.13762e-07
ENSG00000168779	SHOX2	0.01	0.0278541	0.024658	0.0509814	26.0307	28.2125	30.3008	39.4927	0.0298444	0.01	0.0295723	0.0603786	10.4848	9.84974	0.073925	0.25	-10.4108	-9.59974	8.1725e-13
ENSG00000125462	C1orf61	0.00835255	0.01	0.0153707	0.01	4.64901	5.23216	4.10386	5.29016	0.00930183	0.01	0.01	0.01	9.07256	8.53244	0.0727569	-0.343163	-8.9998	-8.8756	8.97016e-12
ENSG00000164114	MAP9	9.95205	9.01631	9.89434	9.88606	35.0122	32.6239	36.9495	35.7325	10.1261	9.82079	10.4439	10.2955	1.8342	1.87753	0.0725699	0.0682979	-1.76163	-1.80923	2.9556e-11
ENSG00000171540	OTP	0.01	0.0240234	0.0212668	0.021985	5.44596	4.84448	3.73748	3.14102	0.0257399	0.01	0.0255053	0.01	8.24056	7.31319	0.0710092	-0.284727	-8.16955	-7.59792	3.61571e-10
ENSG00000225828	FAM229A	8.06197	8.94313	10.1124	7.53093	27.641	30.6113	34.0865	36.4645	7.97169	9.88688	7.26072	9.32633	1.77635	1.99954	0.07065	-0.0890646	-1.7057	-2.08861	2.03326e-07
ENSG00000154764	WNT7A	0.01	0.0233466	0.0826707	0.106828	3.05131	2.8355	1.92785	1.28822	0.0250148	0.01	0.01	0.01	7.4638	4.08504	0.0704237	-3.24412	-7.39338	-7.32916	1.15584e-07
ENSG00000205056	RP11-693J15.5	0.0096794	0.01	0.00890621	0.00920698	0.372356	0.311235	0.349159	0.337903	0.01	0.010631	0.01	0.01	5.11838	5.24533	0.0681247	0.14296	-5.05025	-5.10237	3.60696e-08
ENSG00000257622	RP11-44N21.4	6.34422	4.99552	6.01434	4.02305	27.9647	25.1845	21.7612	34.7551	4.06787	7.81251	6.15226	2.81545	2.22866	2.49328	0.0671922	-0.162573	-2.16147	-2.65586	8.66752e-06
ENSG00000117020	AKT3	20.45	16.4227	16.141	17.9907	119.87	103.933	117.308	109.441	19.7345	18.6944	25.2757	26.4983	2.6016	2.73192	0.0596406	0.601119	-2.54196	-2.1308	6.58184e-11
ENSG00000151490	PTPRO	0.01	0.0142179	0.0251729	0.0650574	4.52222	3.81198	3.62422	3.97375	0.0152338	0.01	0.0150949	0.107869	8.42683	6.39586	0.0592836	0.446549	-8.36754	-5.94931	7.75176e-09
ENSG00000179148	ALOXE3	0.01	0.028432	0.01	0.01	0.986534	0.68411	0.884669	0.784412	0.01	0.0300438	0.01	0.0308156	5.44195	6.38291	0.0592713	1.02912	-5.38268	-5.35379	1.83727e-07
ENSG00000260766	RP11-226L15.5	4.80206	5.62959	5.85703	5.36437	23.3598	22.0771	28.2683	23.1128	5.34781	5.51944	6.1617	4.71769	2.1229	2.19499	0.059021	-0.0446546	-2.06388	-2.23964	2.22685e-08
ENSG00000273217	CTC-432M15.3	8.65558	6.72227	6.15816	7.55978	44.3097	43.2244	45.8875	47.8597	8.67178	7.3154	8.52172	9.26134	2.50899	2.77271	0.0560617	0.37444	-2.45293	-2.39827	6.76474e-12
ENSG00000186715	MST1L	0.291369	0.121138	0.17873	0.203242	1.16757	1.04098	1.18393	1.59839	0.129793	0.298679	0.385831	0.262587	2.42061	2.86475	0.0547829	0.763458	-2.36582	-2.10129	9.57445e-06
ENSG00000242173	ARHGDIG	1.06166	0.971054	0.586111	1.2522	67.5916	67.5658	76.2232	85.1896	0.89856	1.21267	0.515477	0.669748	6.05509	6.45623	0.0546766	-0.633221	-6.00041	-7.08945	2.12631e-12
ENSG00000186300	ZNF555	1.75489	1.54916	1.54835	1.74927	7.84616	8.08763	7.75963	6.99842	1.56614	1.8614	2.30791	2.34251	2.26978	2.162	0.0529429	0.495937	-2.21684	-1.66607	9.51345e-09
ENSG00000101746	NOL4	0.01	0.018798	0.01	0.01	6.13119	5.36303	5.15166	3.26956	0.01	0.0198637	0.01	0.0203739	8.64072	8.71789	0.0524224	0.602833	-8.5883	-8.11505	1.92493e-10
ENSG00000154889	MPPE1	5.33813	4.5676	4.4652	4.38519	19.8514	18.895	21.1272	19.4452	4.14335	6.08499	4.95348	4.61644	1.96773	2.19669	0.0462376	0.112766	-1.92149	-2.08392	5.81311e-09
ENSG00000104381	GDAP1	6.75197	5.27661	4.55436	5.77052	56.6353	60.035	62.4528	61.2689	6.98224	5.43635	5.68613	6.31947	3.2779	3.5829	0.0460352	0.217582	-3.23186	-3.36532	1.58279e-12
ENSG00000106852	LHX6	0.196831	0.148788	0.230502	0.255306	4.19466	4.07016	2.84897	1.94092	0.179347	0.176876	0.157966	0.0201577	4.57973	3.30154	0.0435938	-1.44751	-4.53613	-4.74904	1.30523e-07
ENSG00000188730	VWC2	0.01	0.00946139	0.01	0.01	3.37046	3.31723	4.07622	3.18912	0.01	0.01	0.01	0.0102546	8.42475	8.50489	0.0393855	0.018248	-8.38536	-8.48664	1.17743e-11
ENSG00000177599	ZNF491	1.83182	1.30457	2.09126	2.03282	4.89363	6.66575	6.41371	5.62506	1.32223	1.90013	0.786105	1.45215	1.88189	1.54554	0.0390118	-0.881695	-1.84287	-2.42724	2.39579e-05
ENSG00000131037	EPS8L1	1.3095	1.12088	1.00998	0.915871	4.93101	4.35738	5.98842	7.05877	1.32965	1.16328	1.14752	1.063	1.93425	2.76017	0.0366562	0.198886	-1.89759	-2.56128	6.51945e-08
ENSG00000187008	PKD1L3	0.178187	0.205783	0.273255	0.225987	0.642624	0.613031	0.615672	0.888631	0.176389	0.217449	0.152934	0.223035	1.70938	1.59129	0.0366099	-0.409127	-1.67277	-2.00041	0.000133407
ENSG00000151117	TMEM86A	0.945388	0.781058	0.780652	0.714785	3.32208	4.41685	4.49271	3.14315	0.890858	0.878584	1.71198	0.628077	2.16433	2.35222	0.0354892	0.645973	-2.12884	-1.70625	2.31523e-05
ENSG00000088899	LZTS3	9.90269	8.05429	7.67856	8.96211	57.4655	50.8135	59.5316	59.9818	9.46493	8.93326	7.12947	7.42984	2.59214	2.84439	0.0350194	-0.192772	-2.55712	-3.03716	3.04241e-11
ENSG00000204396	VWA7	0.083327	0.577392	0.843379	0.36988	2.40413	2.51394	2.9367	1.66223	0.309324	0.366075	0.490407	0.156449	2.89598	1.92241	0.0317024	-0.90737	-2.86428	-2.82978	0.000436304
ENSG00000213471	TTLL13	0.31931	0.29501	0.326448	0.134989	1.10893	0.760534	1.5446	1.19432	0.316089	0.311734	0.156604	0.0799355	1.60556	2.5694	0.0313674	-0.964055	-1.57419	-3.53345	0.000341161
ENSG00000101203	COL20A1	0.01	0.01	0.01	0.01	0.281679	0.357174	0.303112	0.175279	0.0104376	0.01	0.0103425	0.01	4.99741	4.58012	0.031229	0.024497	-4.96618	-4.55562	2.90456e-06
ENSG00000109046	WSB1	81.7347	86.5641	98.9138	85.5479	263.367	287.353	312.286	323.138	75.369	96.6119	95.125	81.9351	1.71029	1.7844	0.0312231	-0.0590824	-1.67907	-1.84348	4.73196e-08
ENSG00000204934	ATP6V0E2-AS1	3.7816	3.50825	2.9044	3.2403	26.525	26.6861	24.0634	25.9508	4.55943	2.88333	2.44862	3.94319	2.86777	3.02493	0.029948	0.0568821	-2.83782	-2.96804	1.85591e-09
ENSG00000100314	CABP7	8.52114	7.24941	7.6372	8.04521	24.0538	27.6247	25.713	31.9504	8.78665	7.31376	7.9752	7.32387	1.71233	1.87851	0.0298637	-0.0357026	-1.68247	-1.91421	9.96238e-09
ENSG00000090097	PCBP4	95.3193	87.6754	99.1818	100.116	452.383	465.096	513.309	600.538	84.866	101.809	72.1452	68.1179	2.32587	2.48255	0.0287282	-0.506789	-2.29715	-2.98934	1.99335e-09
ENSG00000270011	ZNF559-ZNF177	3.27359	2.10156	3.23357	3.41146	11.6903	11.0649	13.3536	14.345	2.19811	3.27817	2.364	2.22351	2.08182	2.05946	0.02689	-0.534565	-2.05493	-2.59403	1.35285e-07
ENSG00000214820	MPRIPP1	0.944475	0.490837	0.608321	1.16789	3.17913	2.81194	3.0545	2.00182	0.525908	0.933592	0.208446	0.425589	2.06145	1.50929	0.0241099	-1.48617	-2.03734	-2.99546	0.000425747
ENSG00000256576	RP13-977J11.2	0.557093	0.579034	0.704814	0.529903	3.5997	2.90256	4.07111	4.68833	0.465306	0.688342	0.845284	0.627577	2.51682	2.82666	0.0220782	0.254441	-2.49474	-2.57222	6.36766e-07
ENSG00000226314	ZNF192P1	0.689746	0.548227	1.0453	0.771861	3.12162	4.44533	4.23932	3.23748	0.632583	0.623868	0.268636	0.365654	2.61173	2.04073	0.0213744	-1.51848	-2.59036	-3.55921	2.34809e-06
ENSG00000105048	TNNT1	4.7376	4.87495	4.96944	6.44411	37.7031	35.9961	48.3814	45.4816	4.27359	5.46351	4.28691	2.29491	2.93866	3.03981	0.0185728	-0.794188	-2.92008	-3.834	1.09768e-08
ENSG00000201785	SNORD117	10.8267	9.84644	4.98091	6.4364	29.2845	38.6805	42.0844	23.6221	9.04285	11.891	1.4934	7.62279	1.71704	2.52481	0.0180831	-0.324719	-1.69895	-2.84953	0.00114152
ENSG00000267508	ZNF285	1.16794	1.08943	1.15731	1.0682	3.99612	3.78039	4.39555	3.37901	1.13392	1.15119	1.12358	1.38318	1.78448	1.80463	0.0176233	0.171689	-1.76686	-1.63294	1.70819e-07
ENSG00000128607	KLHDC10	24.8668	22.23	22.3517	25.0862	87.31	80.1112	91.0935	88.1684	24.0951	23.5755	17.311	23.8662	1.82978	1.91796	0.0174713	-0.204194	-1.81231	-2.12215	1.77554e-09
ENSG00000135924	DNAJB2	12.6513	10.6432	13.0878	13.0644	84.6991	77.0182	90.8555	89.8033	10.1193	13.3961	12.3796	10.8859	2.79541	2.78826	0.0136125	-0.168745	-2.7818	-2.95701	2.18552e-11
ENSG00000226853	AC010894.3	0.650148	1.35151	1.31607	0.989465	4.53315	5.57469	5.49917	7.45737	1.01365	0.999687	1.86534	0.878886	2.33621	2.49051	0.00839735	0.251297	-2.32781	-2.23921	2.69661e-05
ENSG00000155530	LRGUK	0.126628	0.394845	0.233025	0.210783	1.7506	1.65881	1.69322	1.69716	0.211529	0.312921	0.1048	0.106987	2.70886	2.93344	0.00821425	-1.06732	-2.70065	-4.00076	4.20579e-06
ENSG00000204580	DDR1	29.7781	24.1302	26.7458	26.7159	131.399	124.57	134.01	142.025	24.3727	29.8325	49.5203	39.5917	2.24739	2.36827	0.00792223	0.737114	-2.23946	-1.63116	2.15648e-07
ENSG00000180479	ZNF571	0.900703	1.0442	0.908442	1.25216	4.74759	3.71302	4.30908	4.23273	0.90662	1.04632	1.08949	1.13174	2.12106	1.98311	0.00595203	0.039926	-2.11511	-1.94318	8.38203e-08
ENSG00000015285	WAS	0.51837	0.763281	1.31165	0.903962	3.06388	1.7491	3.17021	3.17758	0.288642	0.996328	0.715027	1.11925	1.90892	1.51855	0.00373083	-0.272494	-1.90519	-1.79105	0.00339389
ENSG00000271912	RP11-661A12.14	1.97495	2.32283	1.81719	1.63138	7.43498	7.11781	7.9516	11.858	1.91001	2.39743	1.7779	2.75176	1.75963	2.52213	0.00323891	0.393402	-1.75639	-2.12872	3.31218e-06
ENSG00000271975	RP11-383J24.6	4.7478	3.95761	3.97927	3.57709	15.7665	17.4663	17.4246	21.685	3.71688	5.00803	4.51297	5.24259	1.93263	2.37176	0.00322858	0.368534	-1.9294	-2.00323	5.70419e-08
ENSG00000197050	ZNF420	3.68155	2.15243	3.62271	3.64777	11.7406	13.4576	14.5014	11.7939	2.47706	3.36956	2.28521	3.45612	2.11077	1.85468	0.00312232	-0.340666	-2.10765	-2.19535	5.18599e-07
ENSG00000005486	RHBDD2	54.1444	45.6784	49.9356	53.1851	179.365	172.618	193.818	192.64	43.2644	56.7368	56.4471	43.622	1.81806	1.90598	0.00257552	-0.0433384	-1.81548	-1.94932	4.65552e-09
ENSG00000270008	RP11-298P3.4	3.76949	3.21832	3.71613	4.22578	9.38671	11.2227	13.8989	16.4489	3.29835	3.69649	3.86252	2.42652	1.56039	1.93403	0.00144914	-0.336646	-1.55894	-2.27068	1.45581e-05
ENSG00000162526	TSSK3	4.88213	6.73335	7.42931	4.82246	18.623	19.6227	23.0064	22.9429	5.43699	6.18702	5.49103	6.1873	1.71925	1.90705	0.001058	-0.0691554	-1.71819	-1.97621	2.00932e-06
ENSG00000139998	RAB15	16.7234	13.5736	15.9278	16.5104	66.8912	55.3561	66.4663	69.2858	14.7004	15.6071	23.0418	24.2899	2.01256	2.06521	0.000503292	0.545117	-2.01205	-1.52009	1.16783e-07
ENSG00000166111	SVOP	0.01	0.01	0.01	0.01	29.9454	27.4734	29.1146	28.7299	0.01	0.01	0.01	0.01	11.4873	11.498	0	0	-11.4873	-11.498	1.02269e-09
ENSG00000266459	MIR4724	0.01	0.01	0.01	0.01	47.2354	27.5254	22.9999	31.6984	0.01	0.01	0.01	0.01	11.8681	11.4173	0	0	-11.8681	-11.4173	3.76094e-05
ENSG00000216197	AP001623.1	0.01	0.01	0.01	0.01	29.1941	37.427	23.0997	17.8103	0.01	0.01	0.01	0.01	11.7018	10.9982	0	0	-11.7018	-10.9982	9.92512e-05
ENSG00000237341	SYP-AS1	0.01	0.01	0.01	0.01	26.0066	13.3336	17.2313	21.2935	0.01	0.01	0.01	0.213776	10.9418	10.9116	0	3.48398	-10.9418	-7.42759	6.00807e-08
ENSG00000152266	PTH	0.01	0.01	0.01	0.01	9.99025	10.1538	14.6328	13.3213	0.01	0.01	0.01	0.01	9.97614	10.4488	0	0	-9.97614	-10.4488	5.58318e-07
ENSG00000259203	RP11-209K10.2	0.01	0.01	0.01	0.01	12.3213	10.0646	11.1833	12.106	0.01	0.01	0.01	0.01	10.1284	10.1855	0	0	-10.1284	-10.1855	9.93286e-07
ENSG00000156959	LHFPL4	0.01	0.01	0.01	0.01	14.2392	11.1941	12.3003	10.3644	0.01	0.01	0.059957	0.0612079	10.3125	10.1462	0	2.5989	-10.3125	-7.54733	2.30687e-09
ENSG00000227757	AP000282.2	0.01	0.01	0.01	0.01	9.42752	9.51888	9.00434	12.2218	0.01	0.01	0.01	0.339784	9.88771	10.0516	0	4.12839	-9.88771	-5.92323	2.671e-07
ENSG00000259017	RP11-561B11.6	0.01	0.01	0.01	0.01	6.62387	10.4504	8.88449	11.9584	0.01	0.01	0.01	0.01	9.73761	10.0253	0	0	-9.73761	-10.0253	7.05098e-06
ENSG00000162728	KCNJ9	0.01	0.01	0.01	0.01	9.7849	7.28467	7.88483	8.51821	0.01	0.01	0.01	0.0277857	9.73721	9.67975	0	0.917841	-9.73721	-8.76191	6.40801e-10
ENSG00000272079	LA16c-380H5.5	0.01	0.01	0.01	0.01	4.49265	4.54735	7.98341	7.39424	0.01	0.01	0.01	0.01	8.82018	9.58662	0	0	-8.82018	-9.58662	3.93627e-06
ENSG00000188011	CXXC11	0.01	0.01	0.01	0.0375416	17.0333	15.2288	14.2861	15.6479	0.01	0.01	0.01	0.01	10.6556	9.29838	0	-1.24919	-10.6556	-10.5476	2.91994e-10
ENSG00000258114	CTA-109P11.4	0.01	0.01	0.01	0.01	7.9923	6.98602	6.81032	5.11962	0.01	0.01	0.01	0.01	9.54866	9.22037	0	0	-9.54866	-9.22037	9.0185e-06
ENSG00000230260	RP11-75C23.1	0.01	0.01	0.01	0.01	4.51261	3.5763	5.36961	6.55212	0.01	0.01	0.01	0.01	8.6598	9.21938	0	0	-8.6598	-9.21938	2.2008e-05
ENSG00000141433	ADCYAP1	0.01	0.01	0.01	0.01	4.02945	4.79652	5.51422	6.40329	0.01	0.01	0.01	0.01	8.78561	9.21887	0	0	-8.78561	-9.21887	2.15952e-07
ENSG00000183317	EPHA10	0.01	0.01	0.01	0.0120026	6.61385	6.38664	5.74467	5.23887	0.01	0.01	0.01	0.014215	9.34435	8.96345	0	0.138226	-9.34435	-8.82523	5.66561e-12
ENSG00000175077	RTP1	0.01	0.01	0.01	0.01	5.46562	6.0222	4.44345	5.49493	0.01	0.01	0.01	0.01	9.16589	8.95687	0	0	-9.16589	-8.95687	3.99135e-07
ENSG00000257935	RP11-82C23.2	0.01	0.01	0.01	0.01	3.55303	5.39699	3.92143	5.65017	0.01	0.01	0.01	0.01	8.80575	8.90262	0	0	-8.80575	-8.90262	2.97174e-05
ENSG00000165105	RASEF	0.01	0.01	0.0142333	0.014714	4.96516	4.05285	7.11935	6.36447	0.01	0.01	0.01	0.01	8.81667	8.86358	0	-0.533429	-8.81667	-9.39701	1.80941e-09
ENSG00000260987	RP11-423G4.7	0.01	0.01	0.01	0.01	5.02891	3.68223	4.92064	4.13842	0.01	0.01	0.01	0.01	8.76672	8.82322	0	0	-8.76672	-8.82322	5.24449e-07
ENSG00000253477	RP11-1C8.4	0.01	0.01	0.01	0.01	2.22785	3.06527	4.3542	4.23597	0.01	0.01	0.01	0.01	8.04797	8.74654	0	0	-8.04797	-8.74654	1.99791e-05
ENSG00000205856	C22orf42	0.01	0.01	0.01	0.01	3.73043	3.87432	2.67702	4.86729	0.01	0.01	0.01	0.01	8.57076	8.55925	0	0	-8.57076	-8.55925	2.55623e-06
ENSG00000182698	RESP18	0.01	0.01	0.01	0.01	3.47075	2.25636	3.92788	3.2621	0.01	0.01	0.01	0.01	8.16167	8.48984	0	0	-8.16167	-8.48984	9.2571e-06
ENSG00000235024	AC097468.7	0.01	0.01	0.01	0.01	3.13027	4.20846	3.2389	3.94211	0.01	0.01	0.01	0.01	8.51939	8.48804	0	0	-8.51939	-8.48804	3.06133e-05
ENSG00000155052	CNTNAP5	0.01	0.01	0.01	0.01	5.04027	3.84603	4.01711	3.06105	0.01	0.01	0.01	0.01	8.79544	8.46723	0	0	-8.79544	-8.46723	2.64886e-07
ENSG00000184221	OLIG1	0.01	0.01	0.01	0.128898	18.6799	24.6913	22.8117	25.3991	0.01	0.01	0.0996913	0.203542	11.0825	8.43919	0	1.12641	-11.0825	-7.31278	6.15952e-10
ENSG00000186487	MYT1L	0.01	0.01	0.01	0.00747904	3.78092	3.1837	2.65047	3.19581	0.01	0.01	0.01	0.00885762	8.4439	8.38575	0	0.109521	-8.4439	-8.27623	1.23127e-11
ENSG00000006071	ABCC8	0.01	0.01	0.013846	0.01	3.41902	3.42286	3.20076	3.65848	0.01	0.01	0.01	0.01	8.41825	8.16816	0	-0.253747	-8.41825	-8.4219	1.19826e-09
ENSG00000178171	AMER3	0.01	0.01	0.01	0.01	3.08027	3.61306	2.89388	2.72422	0.01	0.01	0.01	0.01	8.38658	8.13394	0	0	-8.38658	-8.13394	1.38666e-07
ENSG00000265179	RP11-672L10.2	0.01	0.01	0.01	0.0250726	3.42228	3.82972	4.72139	5.12675	0.01	0.01	0.01	0.01	8.50223	8.13336	0	-0.810345	-8.50223	-8.94371	6.10827e-09
ENSG00000259594	CTD-2034I4.2	0.01	0.01	0.01	0.01	1.25124	1.35222	2.23624	3.30319	0.01	0.01	0.01	0.106593	7.02429	8.11359	0	2.54341	-7.02429	-5.57019	1.90364e-05
ENSG00000143032	BARHL2	0.01	0.01	0.01	0.01	3.37386	2.90902	2.06871	3.36947	0.01	0.01	0.01	0.01	8.29528	8.08698	0	0	-8.29528	-8.08698	3.93686e-06
ENSG00000089116	LHX5	0.01	0.01	0.01	0.01	2.09703	1.72463	1.84229	3.07762	0.01	0.01	0.01	0.01	7.57806	7.94249	0	0	-7.57806	-7.94249	3.65169e-06
ENSG00000136698	CFC1	0.01	0.01	0.01	0.01	1.30029	1.28812	2.20159	2.32931	0.01	0.01	0.01	0.01	7.01592	7.82365	0	0	-7.01592	-7.82365	8.53104e-05
ENSG00000225978	HAR1A	0.01	0.01	0.01	0.01	2.40211	1.81603	2.81251	1.70455	0.01	0.01	0.0580259	0.118473	7.72046	7.81924	0	3.14159	-7.72046	-4.67765	1.33693e-06
ENSG00000164398	ACSL6	0.01	0.01	0.01	0.00685443	1.94049	1.82793	1.90027	1.66211	0.01	0.01	0.01	0.01	7.55781	7.72357	0	0.246872	-7.55781	-7.4767	8.90316e-10
ENSG00000107187	LHX3	0.01	0.01	0.01	0.01	1.00681	1.32985	2.52996	1.49168	0.01	0.01	0.01	0.01	6.8683	7.65164	0	0	-6.8683	-7.65164	3.22902e-05
ENSG00000006128	TAC1	0.01	0.01	0.0501257	0.01	7.98981	5.06043	7.86052	3.73564	0.01	0.01	0.01	0.12274	9.34986	7.59145	0	1.14255	-9.34986	-6.4489	1.52015e-08
ENSG00000108878	CACNG1	0.01	0.01	0.01	0.01	2.05749	1.65	1.82477	1.82902	0.01	0.01	0.0899355	0.275435	7.5343	7.51325	0	4.19129	-7.5343	-3.32196	1.65557e-05
ENSG00000255366	RP11-1134I14.8	0.01	0.01	0.01	0.01	1.38983	1.13096	1.28399	2.26508	0.01	0.01	0.01	0.01	6.97774	7.4713	0	0	-6.97774	-7.4713	1.86969e-05
ENSG00000050030	KIAA2022	0.01	0.01	0.00807555	0.01	1.85695	1.57827	1.56114	1.4444	0.01	0.01	0.00968501	0.01	7.42426	7.37744	0	0.123058	-7.42426	-7.25438	1.18461e-10
ENSG00000175874	CREG2	0.01	0.01	0.013236	0.01	2.42103	1.81591	1.87879	1.9011	0.01	0.01	0.01	0.01	7.72688	7.34584	0	-0.216361	-7.72688	-7.5622	7.45499e-09
ENSG00000254968	RP11-65M17.3	0.01	0.01	0.01	0.01	1.40595	0.773773	2.18212	1.05309	0.01	0.01	0.01	0.01	6.768	7.33772	0	0	-6.768	-7.33772	0.000155334
ENSG00000091664	SLC17A6	0.01	0.01	0.01	0.0231887	2.90138	2.93229	2.48656	2.43156	0.01	0.01	0.01	0.01	8.18826	7.21127	0	-0.730694	-8.18826	-7.94196	1.18136e-08
ENSG00000118432	CNR1	0.01	0.01	0.00968652	0.0200273	2.70831	3.17191	2.39636	1.98192	0.01	0.01	0.01	0.01	8.19972	7.20309	0	-0.571134	-8.19972	-7.77422	9.04974e-09
ENSG00000254921	RP11-236J17.6	0.01	0.01	0.01	0.01	1.60971	1.29564	1.14508	1.77379	0.01	0.01	0.01	0.01	7.18257	7.18926	0	0	-7.18257	-7.18926	4.97785e-05
ENSG00000151790	TDO2	0.01	0.01	0.0179782	0.01	1.22142	1.2798	2.13876	1.92449	0.01	0.01	0.0215613	0.01	6.96649	7.18219	0	0.173852	-6.96649	-7.00833	5.50417e-09
ENSG00000152214	RIT2	0.01	0.01	0.01	0.01	1.82087	1.11665	1.43547	1.34889	0.01	0.01	0.01	0.01	7.19846	7.1212	0	0	-7.19846	-7.1212	3.61164e-05
ENSG00000198491	RP11-208N14.4	0.01	0.01	0.01	0.01	1.34096	1.87809	1.43534	1.15094	0.01	0.01	0.01	0.01	7.33049	7.01474	0	0	-7.33049	-7.01474	9.46458e-06
ENSG00000169840	GSX1	0.01	0.01	0.01	0.01	1.78442	0.88386	1.07704	1.4651	0.01	0.01	0.01	0.01	7.05977	6.9899	0	0	-7.05977	-6.9899	6.23968e-05
ENSG00000225539	AC018799.1	0.01	0.01	0.01	0.01	1.61417	1.1993	1.41966	0.920743	0.01	0.01	0.01	0.01	7.13621	6.87061	0	0	-7.13621	-6.87061	5.03541e-05
ENSG00000149654	CDH22	0.01	0.01	0.0192001	0.0595455	3.96348	4.02579	4.23081	4.42277	0.01	0.01	0.01	0.01	8.64192	6.77995	0	-1.9772	-8.64192	-8.75715	1.29139e-08
ENSG00000259964	RP11-673C5.2	0.01	0.01	0.0627777	0.01	3.85495	3.61574	3.98874	3.31751	0.01	0.01	0.0752893	0.01	8.5451	6.64949	0	0.228869	-8.5451	-6.42062	9.08009e-09
ENSG00000198883	PNMA5	0.01	0.01	0.01	0.0568964	3.12799	1.74525	3.08774	3.43052	0.01	0.01	0.01	0.01	7.92874	6.60642	0	-1.74193	-7.92874	-8.34834	2.15605e-07
ENSG00000229356	LRRC3-AS1	0.01	0.01	0.01	0.124787	6.30845	4.53082	8.15923	4.90693	0.01	0.01	0.01	0.01	9.08205	6.59901	0	-2.75261	-9.08205	-9.35162	4.45098e-07
ENSG00000167748	KLK1	0.01	0.01	0.01	0.01	0.727939	0.618107	0.914602	0.970655	0.01	0.01	0.0954572	0.0487243	6.07258	6.55862	0	2.84981	-6.07258	-3.7088	1.78538e-05
ENSG00000008197	TFAP2D	0.01	0.01	0.01	0.01	0.866052	1.12193	1.03397	0.829102	0.01	0.01	0.01	0.01	6.63516	6.54154	0	0	-6.63516	-6.54154	4.19734e-05
ENSG00000196542	SPTSSB	0.01	0.01	0.0505406	0.01	2.01399	2.42033	2.80128	2.63659	0.01	0.01	0.01	0.01	7.79257	6.489	0	-1.5979	-7.79257	-8.0869	1.11747e-07
ENSG00000126733	DACH2	0.01	0.01	0.0134658	0.01	0.703731	0.50543	0.855581	1.13127	0.01	0.01	0.01	0.01	5.91786	6.40378	0	-0.230557	-5.91786	-6.63434	4.64298e-07
ENSG00000125851	PCSK2	0.01	0.01	0.01	0.0276443	2.00894	1.8863	1.55447	1.57621	0.01	0.01	0.01	0.01	7.60557	6.3779	0	-0.912433	-7.60557	-7.29033	4.75788e-08
ENSG00000162456	KNCN	0.01	0.01	0.01	0.01	0.528024	1.13334	1.0927	0.54762	0.01	0.01	0.01	0.01	6.37623	6.35783	0	0	-6.37623	-6.35783	0.000126993
ENSG00000147036	LANCL3	0.01	0.01	0.01	0.00950023	0.756426	0.440092	0.906912	0.68488	0.01	0.01	0.0110214	0.01	5.9027	6.35102	0	0.108369	-5.9027	-6.24265	1.12924e-08
ENSG00000166006	KCNC2	0.01	0.01	0.01	0.01	0.990252	0.577049	1.02462	0.604119	0.01	0.01	0.0356465	0.01	6.29214	6.34761	0	1.19051	-6.29214	-5.1571	1.71537e-06
ENSG00000166105	GLB1L3	0.01	0.01	0.01	0.0109372	0.635852	0.520353	0.915366	0.573435	0.01	0.01	0.01	0.01	5.85325	6.15194	0	-0.0660691	-5.85325	-6.21801	1.94596e-07
ENSG00000257434	RP11-81K13.1	0.01	0.01	0.01	0.01	0.65934	0.422638	0.642091	0.563137	0.01	0.01	0.01	0.01	5.75753	5.91316	0	0	-5.75753	-5.91316	4.44285e-05
ENSG00000132975	GPR12	0.01	0.01	0.01	0.01848	0.980944	0.717253	0.894155	0.775123	0.01	0.01	0.01	0.01	6.40786	5.87313	0	-0.509951	-6.40786	-6.38308	2.20916e-07
ENSG00000184611	KCNH7	0.01	0.01	0.01	0.01	0.672258	0.69063	0.51525	0.645562	0.01	0.01	0.01	0.01	6.09052	5.85899	0	0	-6.09052	-5.85899	8.95888e-06
ENSG00000255571	LINC00925	0.01	0.01	0.01	0.01	1.05954	1.12285	0.509911	0.587762	0.01	0.01	0.01	0.01	6.76976	5.7783	0	0	-6.76976	-5.7783	4.28688e-05
ENSG00000070748	CHAT	0.01	0.01	0.01	0.01	0.558399	0.553173	0.412699	0.661855	0.01	0.01	0.01	0.01	5.79646	5.74759	0	0	-5.79646	-5.74759	5.73592e-05
ENSG00000213937	CLDN9	0.01	0.01	0.0923291	0.01	2.53323	1.67301	2.93318	2.56469	0.01	0.01	0.01	0.01	7.71639	5.74758	0	-2.35514	-7.71639	-8.10273	1.08304e-06
ENSG00000259772	RP11-16E12.2	0.01	0.01	0.0605485	0.01	1.58216	1.48898	1.55521	2.21518	0.01	0.01	0.01	0.01	7.26263	5.73996	0	-1.81862	-7.26263	-7.55857	1.69886e-06
ENSG00000231977	RP5-963E22.4	0.01	0.01	0.174608	0.01	8.66888	8.36174	5.90114	3.31233	0.01	0.01	0.01	0.01	9.73392	5.64121	0	-3.20639	-9.73392	-8.8476	4.57796e-06
ENSG00000272887	CSPG4P5	0.01	0.01	0.01	0.01	0.62983	0.656773	0.411593	0.584446	0.01	0.01	0.0304286	0.0310634	6.00742	5.63813	0	1.6204	-6.00742	-4.01773	5.5355e-06
ENSG00000171722	C1orf111	0.01	0.01	0.101542	0.157457	3.78101	5.32272	6.52038	6.19157	0.01	0.01	0.01	0.01	8.83031	5.61709	0	-3.69488	-8.83031	-9.31197	2.78413e-07
ENSG00000230633	RP11-37E23.5	0.01	0.01	0.01	0.223875	3.96119	3.92411	4.68418	6.16229	0.01	0.01	0.01	0.01	8.62302	5.53535	0	-3.54767	-8.62302	-9.08301	4.68922e-06
ENSG00000111344	RASAL1	0.01	0.01	0.01	0.01	0.359659	0.636236	0.345559	0.532867	0.01	0.01	0.01	0.01	5.63792	5.45685	0	0	-5.63792	-5.45685	6.12503e-05
ENSG00000225174	OSTM1-AS1	0.01	0.01	0.0274152	0.01	1.21783	1.45481	0.815355	0.817253	0.01	0.01	0.01	0.01	7.06212	5.44741	0	-0.903625	-7.06212	-6.35103	1.51853e-06
ENSG00000148734	NPFFR1	0.01	0.01	0.0318251	0.01	0.900904	0.768898	0.975193	0.761845	0.01	0.01	0.01	0.0259761	6.38353	5.37612	0	-0.217331	-6.38353	-5.59345	1.11943e-07
ENSG00000175556	LONRF3	0.01	0.01	0.01	0.01	0.428793	0.303414	0.380292	0.444707	0.01	0.01	0.196802	0.0574023	5.19418	5.36632	0	3.66792	-5.19418	-1.6984	0.00103144
ENSG00000266923	RP11-693J15.4	0.01	0.01	0.0480881	0.01	0.942421	0.933599	1.23516	0.977396	0.01	0.01	0.01	0.01	6.55153	5.25133	0	-1.53824	-6.55153	-6.78957	3.80276e-06
ENSG00000185352	HS6ST3	0.01	0.01	0.0570448	0.01	0.819832	1.18132	1.00252	1.54592	0.01	0.01	0.01	0.0698412	6.64469	5.24835	0	0.252007	-6.64469	-4.99634	2.35945e-06
ENSG00000235370	DNM1P51	0.01	0.01	0.0215183	0.01	0.604452	0.598794	0.581795	0.583149	0.01	0.01	0.0129034	0.0263453	5.91079	5.20793	0	0.316457	-5.91079	-4.89147	1.23844e-07
ENSG00000273079	GRIN2B	0.01	0.01	0.01	0.01	0.513354	0.436542	0.366648	0.339232	0.01	0.01	0.00417014	0.01	5.5697	5.14135	0	-0.497146	-5.5697	-5.6385	2.43411e-08
ENSG00000147481	SNTG1	0.01	0.01	0.01	0.0577188	1.06989	1.05988	0.930906	1.23569	0.01	0.01	0.01	0.01	6.73455	4.99973	0	-1.75956	-6.73455	-6.75929	1.4153e-06
ENSG00000226779	NAALADL2-AS2	0.01	0.01	0.182346	0.01	3.0971	1.18004	2.71157	3.33558	0.01	0.01	0.328031	0.01	7.7405	4.97448	0	0.813454	-7.7405	-4.16103	2.71213e-05
ENSG00000227467	RP11-169D4.1	0.01	0.01	0.01	0.039932	0.757014	0.999904	0.731067	0.785108	0.01	0.01	0.01	0.01	6.4569	4.92433	0	-1.31996	-6.4569	-6.24429	4.3051e-06
ENSG00000106113	CRHR2	0.01	0.01	0.0554083	0.01	1.08588	1.07572	0.823948	0.900944	0.01	0.01	0.01	0.0339188	6.75595	4.72089	0	-0.574636	-6.75595	-5.29553	4.29859e-07
ENSG00000136297	MMD2	0.01	0.01	0.01	0.0396729	1.05294	0.645721	0.622563	0.676013	0.01	0.01	0.01	0.01	6.40826	4.70833	0	-1.31246	-6.40826	-6.02079	9.35818e-06
ENSG00000227115	RP11-267C16.1	0.01	0.01	0.01	0.0177459	0.22428	0.311053	0.394508	0.302385	0.01	0.01	0.01	0.01	4.74236	4.65059	0	-0.472276	-4.74236	-5.12287	1.01195e-05
ENSG00000268460	AC006262.6	0.01	0.01	0.01	0.01	0.230097	0.290109	0.28137	0.216942	0.01	0.01	0.01	0.01	4.70101	4.63898	0	0	-4.70101	-4.63898	6.62764e-05
ENSG00000189431	RASSF10	0.01	0.01	0.102421	0.0529401	1.60579	1.52447	2.21535	1.31843	0.01	0.01	0.01	0.01	7.29014	4.50751	0	-2.95756	-7.29014	-7.46507	3.71767e-06
ENSG00000255136	CTD-2562J17.4	0.01	0.01	0.109788	0.113496	4.01633	1.42098	2.67153	2.38022	0.01	0.01	0.01	0.01	8.08675	4.49983	0	-3.48081	-8.08675	-7.98064	1.61603e-05
ENSG00000136931	NR5A1	0.01	0.01	0.0829909	0.01	0.939721	1.25317	0.710552	1.08705	0.01	0.01	0.01	0.01	6.77669	4.27284	0	-2.21709	-6.77669	-6.48993	1.19146e-05
ENSG00000186094	AGBL4	0.01	0.01	0.0251027	0.0389257	0.47556	0.308657	0.492064	0.408173	0.01	0.01	0.01	0.01	5.29318	3.81352	0	-1.67871	-5.29318	-5.49223	8.99569e-06
ENSG00000185737	NRG3	0.01	0.01	0.0746498	0.01	0.536423	0.483093	0.454124	0.429892	0.01	0.01	0.01	0.01	5.67174	3.38449	0	-2.08151	-5.67174	-5.466	6.18021e-05
ENSG00000261568	RP11-524C21.2	0.01	0.01	0.175797	0.0605779	1.37809	0.910129	0.792178	1.58804	0.01	0.01	0.01	0.01	6.83808	3.33195	0	-3.563	-6.83808	-6.89495	8.21259e-05
ENSG00000272543	MIR4787	0.01	0.01	1.12663	2.32936	17.6637	17.4983	16.7536	16.7926	0.01	0.01	0.01	0.01	10.7798	3.27897	0	-7.43296	-10.7798	-10.7119	3.91392e-05
ENSG00000135423	GLS2	0.810268	0.789544	1.04842	1.01157	6.11836	6.00078	6.67715	6.15601	0.958753	0.639632	0.950013	0.798686	2.92131	2.63917	-0.00128688	-0.236356	-2.9226	-2.87552	3.01751e-09
ENSG00000267355	RPL9P29	1.04067	1.26194	1.59591	0.824902	3.54465	4.13114	4.74639	4.10869	0.96579	1.33348	0.765589	1.75851	1.73704	1.87102	-0.00209725	0.0602808	-1.73914	-1.81073	0.000625827
ENSG00000159388	BTG2	11.2665	9.84899	11.362	14.3006	76.959	73.4396	71.277	79.8151	9.51407	11.5136	19.4722	26.6447	2.83242	2.55769	-0.00601061	0.845627	-2.83843	-1.71206	3.44063e-06
ENSG00000173805	HAP1	0.0826397	0.137431	0.152077	0.0786062	7.07341	6.16083	6.57878	6.51166	0.0920318	0.127069	0.0547157	0.148953	5.91016	5.82646	-0.00637094	-0.17969	-5.91653	-6.00615	2.18504e-11
ENSG00000003249	DBNDD1	15.3024	15.3284	12.2529	14.9167	110.27	119.08	122.597	128.999	15.6106	14.754	22.139	32.9966	2.90449	3.21105	-0.0125924	1.02099	-2.91709	-2.19005	5.95054e-08
ENSG00000244425	RN7SL268P	1.73739	2.52814	3.19721	2.97466	8.35443	6.62099	13.3988	8.66448	1.93484	2.28982	1.91721	2.34864	1.8118	1.83787	-0.0138866	-0.532874	-1.82569	-2.37074	0.000191047
ENSG00000123570	RAB9B	1.70142	1.39763	1.81801	1.35735	18.6392	17.1575	18.3303	20.1179	1.40581	1.6577	1.99864	1.76211	3.52993	3.59793	-0.0166392	0.244104	-3.54657	-3.35382	3.20878e-11
ENSG00000181191	PJA1	32.8985	29.9414	30.7867	38.7316	115.712	111.564	111.806	105.731	28.847	33.2697	24.5422	25.3516	1.85469	1.64579	-0.0167025	-0.478532	-1.87139	-2.12433	1.05201e-08
ENSG00000186469	GNG2	39.3244	27.8582	31.1795	33.046	260.288	238.52	263.179	262.605	21.4206	44.9803	31.0723	20.6138	2.89233	3.03325	-0.0168841	-0.313369	-2.90921	-3.34662	9.61987e-08
ENSG00000196123	KIAA0895L	25.3045	25.6525	29.3613	26.3822	81.6113	82.7949	82.0079	87.0009	20.2966	30.0136	26.76	20.8947	1.68991	1.60022	-0.0184306	-0.226185	-1.70834	-1.82641	2.81262e-07
ENSG00000132563	REEP2	20.483	18.5227	19.1926	19.9897	151.432	144.345	156.609	160.488	13.847	24.6293	10.6794	10.7258	2.92276	3.01665	-0.0197138	-0.872244	-2.94247	-3.8889	9.71874e-08
ENSG00000109771	LRP2BP	0.516991	0.580922	0.642829	0.51834	1.78052	1.6973	2.05088	1.93371	0.62243	0.460391	0.493405	0.629624	1.66342	1.77885	-0.0199693	-0.0481835	-1.68339	-1.82704	2.38047e-06
ENSG00000259007	RP11-463J10.3	57.3316	38.3873	40.8976	51.0612	371.195	359.026	386.748	350.971	29.8911	64.3828	54.4983	33.1393	2.93146	3.00401	-0.0219463	-0.0694384	-2.9534	-3.07345	3.8553e-08
ENSG00000260006	RP11-469M7.1	1.8904	2.84704	2.69784	2.86234	6.63215	7.94841	9.4057	7.64789	3.17936	1.48303	2.08606	2.56419	1.62187	1.61687	-0.0230386	-0.257825	-1.64491	-1.8747	7.34321e-05
ENSG00000150637	CD226	0.0779783	0.01	0.0239164	0.0741723	0.593699	0.681006	0.452644	0.712953	0.0578937	0.028548	0.01	0.20497	3.85687	3.57084	-0.0254187	1.13197	-3.88229	-2.43886	0.000220308
ENSG00000173273	TNKS	20.823	16.3755	17.7987	19.917	72.6132	66.6493	76.6484	70.1013	18.9989	17.5268	16.7776	15.8779	1.90449	1.96012	-0.0263301	-0.207839	-1.93082	-2.16796	8.6129e-11
ENSG00000002016	RAD52	6.45595	6.5061	6.75336	7.42506	17.6763	21.4281	21.5263	24.3309	5.82282	6.9019	6.17606	8.13001	1.59304	1.69345	-0.0266612	0.0129308	-1.6197	-1.68052	2.09208e-07
ENSG00000260948	RP11-552M11.8	1.52526	1.00404	0.982394	0.822129	4.15615	3.99616	4.74308	3.86668	1.18902	1.28432	1.90754	1.08822	1.68847	2.25436	-0.0322745	0.731303	-1.72074	-1.52305	2.90447e-05
ENSG00000246922	UBAP1L	0.804896	1.01679	0.911508	0.77739	3.21544	3.20009	2.71091	2.87161	0.868793	0.911224	0.601245	0.948582	1.8163	1.72484	-0.0333809	-0.123976	-1.84968	-1.84881	2.70278e-06
ENSG00000224903	AC005534.8	0.693082	0.720379	0.637718	0.527403	2.33294	2.14602	2.4139	1.90105	0.771851	0.608974	0.458889	0.156154	1.66393	1.88886	-0.0337012	-0.92172	-1.69763	-2.81058	0.000784272
ENSG00000137699	TRIM29	0.0100659	0.0104623	0.0185237	0.0191492	0.496131	0.551425	0.550912	0.514544	0.01	0.01	0.01	0.01	5.67327	4.8218	-0.0376098	-0.913526	-5.71088	-5.73533	2.60126e-08
ENSG00000188629	ZNF177	3.22926	2.00759	3.30453	3.21518	12.5895	12.292	15.2413	16.97	2.15104	2.95007	2.26464	2.0739	2.2483	2.30469	-0.0378872	-0.587597	-2.28619	-2.89228	4.87928e-08
ENSG00000262580	RP11-334C17.5	0.522098	0.980964	1.34879	1.06963	2.94509	2.67838	3.37201	3.48	0.603798	0.860137	0.775566	0.972717	1.90356	1.50246	-0.0380534	-0.468131	-1.94161	-1.97059	0.000111246
ENSG00000159753	RLTPR	0.708044	0.555419	0.565439	0.546413	8.75268	7.95482	9.77098	9.07751	0.818269	0.410834	3.16953	0.842775	3.72504	4.08341	-0.0397773	1.85147	-3.76482	-2.23195	3.37386e-05
ENSG00000232561	GTF2IP1	4.98729	2.79123	3.31813	3.90458	10.054	12.5184	11.5005	10.9054	3.37519	4.17139	4.27578	3.45741	1.53699	1.63327	-0.0436744	0.0985237	-1.58066	-1.53474	6.33922e-06
[truncated: 4,455 more rows]
